# Supplementary material for: Baleen whale navigation in astronomically referenced magnetic coordinates
Source: Research Square preprint supplement (doi:10.21203/rs.3.rs-4613940/v1), 2024-07-01
Supplement: Supplementary file 1 [file 256d1a5756671c6fe58b1590.xlsx]

## Sheet: Satellite - All Species
Index	Published Reference	Species	Region/Population	DeploymentID / PTT Number	timestamp_gmt	EMM Declination	SRA-MD	SSAacw+MD
1	Irvine et al., 2014	Balaenoptera musculus	Northeast Pacific	1993CA-ST6-00834	34210.1	15.5499	62.9642	93.6183
2	Irvine et al., 2014	Balaenoptera musculus	Northeast Pacific	1993CA-ST6-00834	34212.5	15.8484	63.4338	94.676
3	Irvine et al., 2014	Balaenoptera musculus	Northeast Pacific	1993CA-ST6-00834	34213.1	15.848	63.9532	95.2024
4	Irvine et al., 2014	Balaenoptera musculus	Northeast Pacific	1993CA-ST6-10823	34209.8	15.5594	62.5145	93.1863
5	Irvine et al., 2014	Balaenoptera musculus	Northeast Pacific	1993CA-ST6-10823	34213.9	16.0547	63.5841	95.2309
6	Irvine et al., 2014	Balaenoptera musculus	Northeast Pacific	1993CA-ST6-10833	34209.8	15.5626	62.5095	93.1875
7	Irvine et al., 2014	Balaenoptera musculus	Northeast Pacific	1993CA-ST6-10836	34213	15.845	63.5095	94.7516
8	Irvine et al., 2014	Balaenoptera musculus	Northeast Pacific	1993CA-ST6-10836	34213.2	15.7352	64.0705	95.0942
9	Irvine et al., 2014	Balaenoptera musculus	Northeast Pacific	1993CA-ST6-10836	34214.6	15.2795	65.0112	95.1287
10	Irvine et al., 2014	Balaenoptera musculus	Northeast Pacific	1993CA-ST6-10836	34215.6	15.506	65.224	95.7947
11	Irvine et al., 2014	Balaenoptera musculus	Northeast Pacific	1993CA-ST6-10836	34216.2	15.3456	65.8671	96.1221
12	Irvine et al., 2014	Balaenoptera musculus	Northeast Pacific	1994CA-ST10-10820	34590.9	15.8641	69.1965	100.473
13	Irvine et al., 2014	Balaenoptera musculus	Northeast Pacific	1994CA-ST10-10820	34592.7	15.8495	70.1308	101.378
14	Irvine et al., 2014	Balaenoptera musculus	Northeast Pacific	1994CA-ST10-10820	34593.1	15.8054	70.6541	101.817
15	Irvine et al., 2014	Balaenoptera musculus	Northeast Pacific	1994CA-ST10-10820	34595.7	16.1979	71.1764	103.118
16	Irvine et al., 2014	Balaenoptera musculus	Northeast Pacific	1994CA-ST10-10820	34596.6	15.8656	72.009	103.3
17	Irvine et al., 2014	Balaenoptera musculus	Northeast Pacific	1994CA-ST10-10821	34590.9	15.8489	69.2185	100.466
18	Irvine et al., 2014	Balaenoptera musculus	Northeast Pacific	1994CA-ST10-10821	34591	15.8573	69.6661	100.93
19	Irvine et al., 2014	Balaenoptera musculus	Northeast Pacific	1994CA-ST10-10822	34591	15.3178	70.3179	100.527
20	Irvine et al., 2014	Balaenoptera musculus	Northeast Pacific	1994CA-ST10-10823	34591.9	15.8808	69.6371	100.947
21	Irvine et al., 2014	Balaenoptera musculus	Northeast Pacific	1994CA-ST10-10823	34592.2	15.8445	70.1399	101.377
22	Irvine et al., 2014	Balaenoptera musculus	Northeast Pacific	1994CA-ST10-10823	34594.1	15.8853	71.0215	102.339
23	Irvine et al., 2014	Balaenoptera musculus	Northeast Pacific	1994CA-ST10-10823	34595.1	16.1675	71.1755	103.048
24	Irvine et al., 2014	Balaenoptera musculus	Northeast Pacific	1994CA-ST10-10823	34600	15.4411	74.2717	104.715
25	Irvine et al., 2014	Balaenoptera musculus	Northeast Pacific	1994CA-ST10-10824	34591.9	15.8785	69.6393	100.944
26	Irvine et al., 2014	Balaenoptera musculus	Northeast Pacific	1994CA-ST10-10824	34592.1	15.8242	70.1666	101.365
27	Irvine et al., 2014	Balaenoptera musculus	Northeast Pacific	1994CA-ST10-10828	34608.8	14.4971	78.795	107.386
28	Irvine et al., 2014	Balaenoptera musculus	Northeast Pacific	1994CA-ST10-10828	34609	14.4967	79.24	107.83
29	Irvine et al., 2014	Balaenoptera musculus	Northeast Pacific	1994CA-ST10-10828	34610.1	14.5852	79.594	108.361
30	Irvine et al., 2014	Balaenoptera musculus	Northeast Pacific	1994CA-ST10-10828	34611.1	14.314	80.2862	108.516
31	Irvine et al., 2014	Balaenoptera musculus	Northeast Pacific	1994CA-ST10-10828	34612.2	14.1807	80.8402	108.808
32	Irvine et al., 2014	Balaenoptera musculus	Northeast Pacific	1994CA-ST10-10828	34613.1	13.9014	81.5231	108.94
33	Irvine et al., 2014	Balaenoptera musculus	Northeast Pacific	1994CA-ST10-10828	34614.1	13.2257	82.5832	108.66
34	Irvine et al., 2014	Balaenoptera musculus	Northeast Pacific	1994CA-ST10-10828	34615	12.9998	83.1671	108.807
35	Irvine et al., 2014	Balaenoptera musculus	Northeast Pacific	1994CA-ST10-10828	34616	12.6822	83.8472	108.865
36	Irvine et al., 2014	Balaenoptera musculus	Northeast Pacific	1994CA-ST10-10828	34617	12.236	84.6394	108.78
37	Irvine et al., 2014	Balaenoptera musculus	Northeast Pacific	1994CA-ST10-10828	34618.1	12.0977	85.1004	108.983
38	Irvine et al., 2014	Balaenoptera musculus	Northeast Pacific	1994CA-ST10-10828	34619.2	11.8877	85.6438	109.122
39	Irvine et al., 2014	Balaenoptera musculus	Northeast Pacific	1994CA-ST10-10828	34620	11.9587	86.0302	109.638
40	Irvine et al., 2014	Balaenoptera musculus	Northeast Pacific	1994CA-ST10-10828	34621.1	11.7751	86.6803	109.908
41	Irvine et al., 2014	Balaenoptera musculus	Northeast Pacific	1994CA-ST10-10828	34622.1	11.994	86.8031	110.48
42	Irvine et al., 2014	Balaenoptera musculus	Northeast Pacific	1994CA-ST10-10829	34604.9	14.4589	77.0509	105.57
43	Irvine et al., 2014	Balaenoptera musculus	Northeast Pacific	1994CA-ST10-10829	34605.1	14.465	77.4909	106.021
44	Irvine et al., 2014	Balaenoptera musculus	Northeast Pacific	1994CA-ST10-10829	34606	14.4604	77.9386	106.46
45	Irvine et al., 2014	Balaenoptera musculus	Northeast Pacific	1994CA-ST10-10829	34607.1	14.4439	78.395	106.885
46	Irvine et al., 2014	Balaenoptera musculus	Northeast Pacific	1994CA-ST6-00848	34614	14.4739	81.4355	109.985
47	Irvine et al., 2014	Balaenoptera musculus	Northeast Pacific	1994CA-ST6-00848	34615	14.4446	81.9432	110.426
48	Irvine et al., 2014	Balaenoptera musculus	Northeast Pacific	1994CA-ST6-23029	34614.7	14.443	81.5044	109.984
49	Irvine et al., 2014	Balaenoptera musculus	Northeast Pacific	1994CA-ST6-23029	34615	14.4542	81.9333	110.435
50	Irvine et al., 2014	Balaenoptera musculus	Northeast Pacific	1995CA-ST10-04172	34934.8	14.275	62.1657	90.321
51	Irvine et al., 2014	Balaenoptera musculus	Northeast Pacific	1995CA-ST10-04172	34935.1	14.249	62.5956	90.7001
52	Irvine et al., 2014	Balaenoptera musculus	Northeast Pacific	1995CA-ST10-04172	34936.1	14.1837	63.051	91.0244
53	Irvine et al., 2014	Balaenoptera musculus	Northeast Pacific	1995CA-ST10-04172	34937.1	14.1734	63.4615	91.4148
54	Irvine et al., 2014	Balaenoptera musculus	Northeast Pacific	1995CA-ST10-04172	34939.1	14.0621	64.4007	92.1338
55	Irvine et al., 2014	Balaenoptera musculus	Northeast Pacific	1995CA-ST10-04172	34940.1	14.1714	64.7495	92.7067
56	Irvine et al., 2014	Balaenoptera musculus	Northeast Pacific	1995CA-ST10-04172	34941.1	13.5986	65.7266	92.5384
57	Irvine et al., 2014	Balaenoptera musculus	Northeast Pacific	1995CA-ST10-04172	34942.1	14.2567	65.4551	93.58
58	Irvine et al., 2014	Balaenoptera musculus	Northeast Pacific	1995CA-ST10-04172	34943.1	13.9368	66.3557	93.8609
59	Irvine et al., 2014	Balaenoptera musculus	Northeast Pacific	1995CA-ST10-04172	34947.4	14.0279	67.8178	95.4912
60	Irvine et al., 2014	Balaenoptera musculus	Northeast Pacific	1995CA-ST10-04172	34949.1	13.7901	68.9659	96.1752
61	Irvine et al., 2014	Balaenoptera musculus	Northeast Pacific	1995CA-ST10-04172	34950.4	14.1511	69.0115	96.939
62	Irvine et al., 2014	Balaenoptera musculus	Northeast Pacific	1995CA-ST10-04172	34951.1	13.7089	69.948	97.0047
63	Irvine et al., 2014	Balaenoptera musculus	Northeast Pacific	1995CA-ST10-04172	34952.1	13.8779	70.1953	97.5896
64	Irvine et al., 2014	Balaenoptera musculus	Northeast Pacific	1995CA-ST10-04172	34953.6	13.7152	70.7659	97.8316
65	Irvine et al., 2014	Balaenoptera musculus	Northeast Pacific	1995CA-ST10-04173	34961.1	14.3735	73.5056	101.869
66	Irvine et al., 2014	Balaenoptera musculus	Northeast Pacific	1995CA-ST10-04173	34962.1	14.4348	73.8547	102.325
67	Irvine et al., 2014	Balaenoptera musculus	Northeast Pacific	1995CA-ST10-04173	34963.5	14.902	73.8111	103.199
68	Irvine et al., 2014	Balaenoptera musculus	Northeast Pacific	1995CA-ST10-04173	34964.5	14.611	74.5657	103.383
69	Irvine et al., 2014	Balaenoptera musculus	Northeast Pacific	1995CA-ST10-04173	34965	14.7883	74.835	104.005
70	Irvine et al., 2014	Balaenoptera musculus	Northeast Pacific	1995CA-ST10-04173	34966.1	14.7962	75.2746	104.46
71	Irvine et al., 2014	Balaenoptera musculus	Northeast Pacific	1995CA-ST10-04173	34967.1	14.9186	75.6007	105.025
72	Irvine et al., 2014	Balaenoptera musculus	Northeast Pacific	1995CA-ST10-04173	34968.1	14.7513	76.2157	105.307
73	Irvine et al., 2014	Balaenoptera musculus	Northeast Pacific	1995CA-ST10-04173	34969	14.3735	77.0249	105.379
74	Irvine et al., 2014	Balaenoptera musculus	Northeast Pacific	1995CA-ST10-04173	34970.5	14.1493	77.6855	105.595
75	Irvine et al., 2014	Balaenoptera musculus	Northeast Pacific	1995CA-ST10-04173	34971.1	13.8388	78.4231	105.719
76	Irvine et al., 2014	Balaenoptera musculus	Northeast Pacific	1995CA-ST10-04173	34972.1	13.0195	79.6503	105.323
77	Irvine et al., 2014	Balaenoptera musculus	Northeast Pacific	1995CA-ST10-04173	34973.6	12.0688	80.9247	104.748
78	Irvine et al., 2014	Balaenoptera musculus	Northeast Pacific	1995CA-ST10-04173	34974.6	12.8715	80.6078	106.005
79	Irvine et al., 2014	Balaenoptera musculus	Northeast Pacific	1995CA-ST10-04173	34975.4	12.6616	81.1998	106.194
80	Irvine et al., 2014	Balaenoptera musculus	Northeast Pacific	1995CA-ST10-04173	34976.1	12.8322	81.4321	106.773
81	Irvine et al., 2014	Balaenoptera musculus	Northeast Pacific	1995CA-ST10-04173	34977.4	11.942	82.639	106.233
82	Irvine et al., 2014	Balaenoptera musculus	Northeast Pacific	1995CA-ST10-04173	34978.1	11.5888	83.3735	106.27
83	Irvine et al., 2014	Balaenoptera musculus	Northeast Pacific	1995CA-ST10-04176	34974.9	14.4426	79.1782	107.663
84	Irvine et al., 2014	Balaenoptera musculus	Northeast Pacific	1995CA-ST10-04176	34975.9	14.2785	79.7745	107.934
85	Irvine et al., 2014	Balaenoptera musculus	Northeast Pacific	1995CA-ST10-04176	34976.1	14.2459	80.2466	108.341
86	Irvine et al., 2014	Balaenoptera musculus	Northeast Pacific	1995CA-ST10-04176	34978.4	14.1709	81.1205	109.084
87	Irvine et al., 2014	Balaenoptera musculus	Northeast Pacific	1995CA-ST10-04176	34980	13.7918	81.9633	109.16
88	Irvine et al., 2014	Balaenoptera musculus	Northeast Pacific	1995CA-ST10-04176	34980.1	13.9252	82.2767	109.737
89	Irvine et al., 2014	Balaenoptera musculus	Northeast Pacific	1995CA-ST10-04176	34981.1	13.402	83.213	109.63
90	Irvine et al., 2014	Balaenoptera musculus	Northeast Pacific	1995CA-ST10-04176	34982.6	13.9078	83.1512	110.577
91	Irvine et al., 2014	Balaenoptera musculus	Northeast Pacific	1995CA-ST10-04176	34983.6	13.4742	83.9259	110.5
92	Irvine et al., 2014	Balaenoptera musculus	Northeast Pacific	1995CA-ST10-04176	34984.1	13.5197	84.3185	110.981
93	Irvine et al., 2014	Balaenoptera musculus	Northeast Pacific	1995CA-ST10-04176	34985.4	13.5781	84.7624	111.528
94	Irvine et al., 2014	Balaenoptera musculus	Northeast Pacific	1995CA-ST10-04176	34986.4	13.557	85.1945	111.919
95	Irvine et al., 2014	Balaenoptera musculus	Northeast Pacific	1995CA-ST10-04176	34988.4	13.485	86.0577	112.645
96	Irvine et al., 2014	Balaenoptera musculus	Northeast Pacific	1995CA-ST10-04176	34989.1	13.1924	86.6788	112.693
97	Irvine et al., 2014	Balaenoptera musculus	Northeast Pacific	1995CA-ST10-04176	34992.5	12.5939	88.2345	113.086
98	Irvine et al., 2014	Balaenoptera musculus	Northeast Pacific	1995CA-ST10-04176	34993.1	12.3297	88.8685	113.195
99	Irvine et al., 2014	Balaenoptera musculus	Northeast Pacific	1995CA-ST10-04176	34995.1	11.9469	89.8996	113.478
100	Irvine et al., 2014	Balaenoptera musculus	Northeast Pacific	1995CA-ST10-04176	34996.1	11.5714	90.6264	113.457
101	Irvine et al., 2014	Balaenoptera musculus	Northeast Pacific	1995CA-ST10-04176	34997.1	11.7457	90.7721	113.959
102	Irvine et al., 2014	Balaenoptera musculus	Northeast Pacific	1995CA-ST10-04176	34998.1	11.5026	91.3349	114.043
103	Irvine et al., 2014	Balaenoptera musculus	Northeast Pacific	1995CA-ST10-04176	34999.4	11.266	91.8568	114.103
104	Irvine et al., 2014	Balaenoptera musculus	Northeast Pacific	1995CA-ST10-04176	35000.1	11.1079	92.3198	114.258
105	Irvine et al., 2014	Balaenoptera musculus	Northeast Pacific	1995CA-ST10-04176	35001.9	10.7014	93.0365	114.168
106	Irvine et al., 2014	Balaenoptera musculus	Northeast Pacific	1995CA-ST10-04176	35002.1	10.7441	93.3292	114.549
107	Irvine et al., 2014	Balaenoptera musculus	Northeast Pacific	1995CA-ST10-04176	35004.6	10.5241	94.1756	114.965
108	Irvine et al., 2014	Balaenoptera musculus	Northeast Pacific	1995CA-ST10-04176	35008.1	9.78127	96.1533	115.472
109	Irvine et al., 2014	Balaenoptera musculus	Northeast Pacific	1995CA-ST10-04176	35011.1	9.80597	96.9305	116.321
110	Irvine et al., 2014	Balaenoptera musculus	Northeast Pacific	1995CA-ST10-04176	35013.6	9.27018	98.1874	116.491
111	Irvine et al., 2014	Balaenoptera musculus	Northeast Pacific	1995CA-ST10-04176	35017.1	9.35626	99.1501	117.643
112	Irvine et al., 2014	Balaenoptera musculus	Northeast Pacific	1995CA-ST10-23037	34953.8	14.4132	69.9239	98.3549
113	Irvine et al., 2014	Balaenoptera musculus	Northeast Pacific	1995CA-ST10-23037	34954.1	14.4116	70.3633	98.7915
114	Irvine et al., 2014	Balaenoptera musculus	Northeast Pacific	1995CA-ST10-23040	34961.2	14.2106	73.6531	101.684
115	Irvine et al., 2014	Balaenoptera musculus	Northeast Pacific	1995CA-ST10-23040	34962.1	14.4172	73.8777	102.316
116	Irvine et al., 2014	Balaenoptera musculus	Northeast Pacific	1995CA-ST10-23040	34963.1	14.5331	74.2033	102.871
117	Irvine et al., 2014	Balaenoptera musculus	Northeast Pacific	1995CA-ST10-23040	34964.1	14.4746	74.7116	103.267
118	Irvine et al., 2014	Balaenoptera musculus	Northeast Pacific	1995CA-ST10-23040	34965	14.2096	75.4196	103.449
119	Irvine et al., 2014	Balaenoptera musculus	Northeast Pacific	1995CA-ST10-23040	34966.6	14.0731	75.9979	103.758
120	Irvine et al., 2014	Balaenoptera musculus	Northeast Pacific	1995CA-ST10-23040	34967.4	14.0626	76.4481	104.188
121	Irvine et al., 2014	Balaenoptera musculus	Northeast Pacific	1995CA-ST10-23040	34968.1	14.1199	76.832	104.684
122	Irvine et al., 2014	Balaenoptera musculus	Northeast Pacific	1995CA-ST10-23040	34969.1	14.0686	77.3185	105.073
123	Irvine et al., 2014	Balaenoptera musculus	Northeast Pacific	1995CA-ST10-23040	34970.1	14.1707	77.6493	105.612
124	Irvine et al., 2014	Balaenoptera musculus	Northeast Pacific	1995CA-ST10-23040	34971.1	13.819	78.4282	105.694
125	Irvine et al., 2014	Balaenoptera musculus	Northeast Pacific	1995CA-ST10-23040	34972.1	13.36	79.3171	105.666
126	Irvine et al., 2014	Balaenoptera musculus	Northeast Pacific	1995CA-ST10-23040	34973.5	13.1727	79.9315	105.909
127	Irvine et al., 2014	Balaenoptera musculus	Northeast Pacific	1995CA-ST10-23040	34974.4	13.7449	79.8261	106.934
128	Irvine et al., 2014	Balaenoptera musculus	Northeast Pacific	1995CA-ST10-23040	34975.1	13.7701	80.2523	107.405
129	Irvine et al., 2014	Balaenoptera musculus	Northeast Pacific	1995CA-ST10-23040	34976.1	13.8468	80.6485	107.944
130	Irvine et al., 2014	Balaenoptera musculus	Northeast Pacific	1995CA-ST10-23040	34977.6	13.8667	81.0668	108.402
131	Irvine et al., 2014	Balaenoptera musculus	Northeast Pacific	1995CA-ST10-23040	34978.4	14.4842	80.9134	109.477
132	Irvine et al., 2014	Balaenoptera musculus	Northeast Pacific	1995CA-ST10-23040	34979.6	13.9602	81.772	109.311
133	Irvine et al., 2014	Balaenoptera musculus	Northeast Pacific	1995CA-ST10-23040	34981.1	12.884	83.6765	109.069
134	Irvine et al., 2014	Balaenoptera musculus	Northeast Pacific	1995CA-ST10-23040	34982.1	13.0381	83.8569	109.576
135	Irvine et al., 2014	Balaenoptera musculus	Northeast Pacific	1995CA-ST10-23040	34983.5	12.1797	85.0023	109.031
136	Irvine et al., 2014	Balaenoptera musculus	Northeast Pacific	1995CA-ST10-23040	34984.1	12.17	85.3833	109.4
137	Irvine et al., 2014	Balaenoptera musculus	Northeast Pacific	1995CA-ST10-23040	34985.1	12.0161	85.8723	109.596
138	Irvine et al., 2014	Balaenoptera musculus	Northeast Pacific	1995CA-ST10-23040	34986.1	11.592	86.5985	109.494
139	Irvine et al., 2014	Balaenoptera musculus	Northeast Pacific	1995CA-ST10-23040	34987.1	11.2889	87.245	109.544
140	Irvine et al., 2014	Balaenoptera musculus	Northeast Pacific	1995CA-ST10-23040	34989.1	10.8852	88.341	109.85
141	Irvine et al., 2014	Balaenoptera musculus	Northeast Pacific	1995CA-ST10-23040	34990.1	10.7403	88.82	110.049
142	Irvine et al., 2014	Balaenoptera musculus	Northeast Pacific	1995CA-ST10-23040	34991.1	10.5237	89.3884	110.189
143	Irvine et al., 2014	Balaenoptera musculus	Northeast Pacific	1995CA-ST10-23040	34992.1	10.7345	89.5608	110.782
144	Irvine et al., 2014	Balaenoptera musculus	Northeast Pacific	1995CA-ST10-23040	34993.1	10.576	90.0799	110.987
145	Irvine et al., 2014	Balaenoptera musculus	Northeast Pacific	1995CA-ST10-23040	34994.4	10.431	90.6036	111.22
146	Irvine et al., 2014	Balaenoptera musculus	Northeast Pacific	1995CA-ST10-23040	34995.1	10.4189	90.9934	111.584
147	Irvine et al., 2014	Balaenoptera musculus	Northeast Pacific	1995CA-ST10-23040	34996.1	10.3976	91.3899	111.937
148	Irvine et al., 2014	Balaenoptera musculus	Northeast Pacific	1995CA-ST10-23040	34997.1	10.4257	91.7285	112.331
149	Irvine et al., 2014	Balaenoptera musculus	Northeast Pacific	1995CA-ST10-23040	34998.1	10.4876	92.0329	112.759
150	Irvine et al., 2014	Balaenoptera musculus	Northeast Pacific	1995CA-ST10-23040	34999.1	10.5067	92.3844	113.147
151	Irvine et al., 2014	Balaenoptera musculus	Northeast Pacific	1995CA-ST10-23040	35000.1	10.1961	93.0493	113.191
152	Irvine et al., 2014	Balaenoptera musculus	Northeast Pacific	1995CA-ST10-23040	35001.1	10.441	93.1382	113.773
153	Irvine et al., 2014	Balaenoptera musculus	Northeast Pacific	1995CA-ST10-23040	35002.1	9.87996	94.1379	113.637
154	Irvine et al., 2014	Balaenoptera musculus	Northeast Pacific	1995CA-ST10-23040	35003.1	10.4707	93.8545	114.542
155	Irvine et al., 2014	Balaenoptera musculus	Northeast Pacific	1995CA-ST10-23040	35004.1	10.4327	94.2407	114.851
156	Irvine et al., 2014	Balaenoptera musculus	Northeast Pacific	1995CA-ST10-23040	35006.1	10.5066	94.8889	115.641
157	Irvine et al., 2014	Balaenoptera musculus	Northeast Pacific	1995CA-ST10-23040	35007.1	10.4483	95.2654	115.903
158	Irvine et al., 2014	Balaenoptera musculus	Northeast Pacific	1995CA-ST10-23040	35008.6	9.97919	95.9281	115.647
159	Irvine et al., 2014	Balaenoptera musculus	Northeast Pacific	1995CA-ST10-23040	35009.1	10.0481	96.1116	115.978
160	Irvine et al., 2014	Balaenoptera musculus	Northeast Pacific	1995CA-ST10-23040	35010.1	9.98792	96.422	116.178
161	Irvine et al., 2014	Balaenoptera musculus	Northeast Pacific	1995CA-ST10-23040	35011.9	9.81348	96.8993	116.308
162	Irvine et al., 2014	Balaenoptera musculus	Northeast Pacific	1995CA-ST10-23040	35013.6	9.60894	97.6329	116.645
163	Irvine et al., 2014	Balaenoptera musculus	Northeast Pacific	1995CA-ST10-23040	35014.1	9.56503	97.9952	116.917
164	Irvine et al., 2014	Balaenoptera musculus	Northeast Pacific	1995CA-ST10-23040	35016.1	9.34606	98.6735	117.176
165	Irvine et al., 2014	Balaenoptera musculus	Northeast Pacific	1995CA-ST10-23040	35017.6	9.39352	98.9413	117.534
166	Irvine et al., 2014	Balaenoptera musculus	Northeast Pacific	1995CA-ST10-23040	35018.6	9.0797	99.3593	117.352
167	Irvine et al., 2014	Balaenoptera musculus	Northeast Pacific	1995CA-ST10-23040	35019.1	8.892	99.8676	117.477
168	Irvine et al., 2014	Balaenoptera musculus	Northeast Pacific	1995CA-ST10-23040	35020.1	8.80312	100.25	117.678
169	Irvine et al., 2014	Balaenoptera musculus	Northeast Pacific	1995CA-ST10-23040	35022.1	8.69184	100.87	118.076
170	Irvine et al., 2014	Balaenoptera musculus	Northeast Pacific	1995CA-ST10-23040	35023.6	8.29175	101.46	117.876
171	Irvine et al., 2014	Balaenoptera musculus	Northeast Pacific	1995CA-ST10-23040	35026.1	8.01359	102.456	118.314
172	Irvine et al., 2014	Balaenoptera musculus	Northeast Pacific	1995CA-ST10-23040	35027.6	8.61348	102.143	119.192
173	Irvine et al., 2014	Balaenoptera musculus	Northeast Pacific	1995CA-ST10-23040	35028.6	7.94845	102.961	118.69
174	Irvine et al., 2014	Balaenoptera musculus	Northeast Pacific	1995CA-ST10-23040	35029.1	7.88527	103.164	118.779
175	Irvine et al., 2014	Balaenoptera musculus	Northeast Pacific	1995CA-ST10-23040	35031.6	7.58525	103.887	118.898
176	Irvine et al., 2014	Balaenoptera musculus	Northeast Pacific	1995CA-ST10-23040	35035.1	6.88481	105.284	118.897
177	Irvine et al., 2014	Balaenoptera musculus	Northeast Pacific	1995CA-ST10-23040	35036.6	7.35005	104.826	119.4
178	Irvine et al., 2014	Balaenoptera musculus	Northeast Pacific	1995CA-ST10-23040	35039.1	7.17384	105.442	119.663
179	Irvine et al., 2014	Balaenoptera musculus	Northeast Pacific	1995CA-ST10-23040	35041.6	7.1041	105.704	119.799
180	Irvine et al., 2014	Balaenoptera musculus	Northeast Pacific	1995CA-ST10-23041	34952.9	14.414	69.4845	97.9165
181	Irvine et al., 2014	Balaenoptera musculus	Northeast Pacific	1995CA-ST10-23041	34953.1	14.4079	69.9295	98.35
182	Irvine et al., 2014	Balaenoptera musculus	Northeast Pacific	1995CA-ST10-23041	34954.1	14.4252	70.3417	98.7955
183	Irvine et al., 2014	Balaenoptera musculus	Northeast Pacific	1995CA-ST10-23041	34955.1	14.2964	70.9051	99.1007
184	Irvine et al., 2014	Balaenoptera musculus	Northeast Pacific	1995CA-ST10-23041	34956.1	14.3557	71.3036	99.6218
185	Irvine et al., 2014	Balaenoptera musculus	Northeast Pacific	1995CA-ST10-23041	34957.1	14.4494	71.6314	100.133
186	Irvine et al., 2014	Balaenoptera musculus	Northeast Pacific	1995CA-ST10-23041	34958.1	14.5219	72.0013	100.648
187	Irvine et al., 2014	Balaenoptera musculus	Northeast Pacific	1995CA-ST10-23041	34959.1	14.1341	72.8688	100.753
188	Irvine et al., 2014	Balaenoptera musculus	Northeast Pacific	1995CA-ST10-23041	34960.5	13.8343	73.6428	100.944
189	Irvine et al., 2014	Balaenoptera musculus	Northeast Pacific	1995CA-ST10-23041	34961.1	13.8654	74.0423	101.405
190	Irvine et al., 2014	Balaenoptera musculus	Northeast Pacific	1995CA-ST10-23041	34962.1	13.8092	74.533	101.785
191	Irvine et al., 2014	Balaenoptera musculus	Northeast Pacific	1995CA-ST10-23041	34963.1	13.8612	74.9113	102.265
192	Irvine et al., 2014	Balaenoptera musculus	Northeast Pacific	1995CA-ST10-23042	34934.9	14.3004	62.1516	90.3587
193	Irvine et al., 2014	Balaenoptera musculus	Northeast Pacific	1995CA-ST10-23042	34935.1	13.8398	63.0797	90.3727
194	Irvine et al., 2014	Balaenoptera musculus	Northeast Pacific	1995CA-ST10-23042	34937.6	14.0361	63.7829	91.4792
195	Irvine et al., 2014	Balaenoptera musculus	Northeast Pacific	1995CA-ST10-23042	34938.2	14.4176	63.5672	92.0038
196	Irvine et al., 2014	Balaenoptera musculus	Northeast Pacific	1995CA-ST10-23042	34940.1	14.0858	64.7651	92.5438
197	Irvine et al., 2014	Balaenoptera musculus	Northeast Pacific	1995CA-ST10-23042	34944.1	13.7454	66.7679	93.8672
198	Irvine et al., 2014	Balaenoptera musculus	Northeast Pacific	1995CA-ST10-23042	34945.1	14.0274	66.9881	94.662
199	Irvine et al., 2014	Balaenoptera musculus	Northeast Pacific	1995CA-ST10-23042	34947.1	14.5694	67.1212	95.856
200	Irvine et al., 2014	Balaenoptera musculus	Northeast Pacific	1995CA-ST10-23042	34948.1	14.9004	67.1196	96.5023
201	Irvine et al., 2014	Balaenoptera musculus	Northeast Pacific	1995CA-ST10-23042	34949.1	15.4769	66.8332	97.3484
202	Irvine et al., 2014	Balaenoptera musculus	Northeast Pacific	1995CA-ST10-23042	34951.5	16.7386	66.1246	99.1165
203	Irvine et al., 2014	Balaenoptera musculus	Northeast Pacific	1995CA-ST10-23042	34952.2	16.6076	66.7778	99.5141
204	Irvine et al., 2014	Balaenoptera musculus	Northeast Pacific	1995CA-ST10-23042	34953.5	16.2093	67.7248	99.6765
205	Irvine et al., 2014	Balaenoptera musculus	Northeast Pacific	1995CA-ST10-23043	34975.1	14.7155	79.3714	108.394
206	Irvine et al., 2014	Balaenoptera musculus	Northeast Pacific	1995CA-ST6-00837	34962	14.4138	73.4337	101.863
207	Irvine et al., 2014	Balaenoptera musculus	Northeast Pacific	1995CA-ST6-00837	34962.1	14.4229	73.8701	102.319
208	Irvine et al., 2014	Balaenoptera musculus	Northeast Pacific	1995CA-ST6-00837	34963.1	14.2839	74.4607	102.637
209	Irvine et al., 2014	Balaenoptera musculus	Northeast Pacific	1995CA-ST6-00837	34964.4	14.4998	74.6828	103.286
210	Irvine et al., 2014	Balaenoptera musculus	Northeast Pacific	1995CA-ST6-00837	34965.1	14.4265	75.2003	103.658
211	Irvine et al., 2014	Balaenoptera musculus	Northeast Pacific	1995CA-ST6-00837	34966.1	14.1256	75.9456	103.811
212	Irvine et al., 2014	Balaenoptera musculus	Northeast Pacific	1995CA-ST6-00837	34967.1	13.9742	76.5355	104.103
213	Irvine et al., 2014	Balaenoptera musculus	Northeast Pacific	1995CA-ST6-00837	34969.1	13.6462	77.7419	104.65
214	Irvine et al., 2014	Balaenoptera musculus	Northeast Pacific	1995CA-ST6-00837	34970.1	13.8229	77.9995	105.265
215	Irvine et al., 2014	Balaenoptera musculus	Northeast Pacific	1995CA-ST6-00837	34971.1	13.8654	78.3993	105.747
216	Irvine et al., 2014	Balaenoptera musculus	Northeast Pacific	1995CA-ST6-00837	34972.1	13.8946	78.7982	106.209
217	Irvine et al., 2014	Balaenoptera musculus	Northeast Pacific	1995CA-ST6-00841	34952.9	14.4157	69.4816	97.9168
218	Irvine et al., 2014	Balaenoptera musculus	Northeast Pacific	1995CA-ST6-00841	34953.1	14.4189	69.911	98.352
219	Irvine et al., 2014	Balaenoptera musculus	Northeast Pacific	1995CA-ST6-00841	34954.5	14.4157	70.3574	98.7934
220	Irvine et al., 2014	Balaenoptera musculus	Northeast Pacific	1995CA-ST6-00841	34955	14.4111	70.7993	99.2262
221	Irvine et al., 2014	Balaenoptera musculus	Northeast Pacific	1995CA-ST6-00841	34956.1	14.3783	71.2784	99.6417
222	Irvine et al., 2014	Balaenoptera musculus	Northeast Pacific	1995CA-ST6-00841	34957.1	14.4193	71.6675	100.11
223	Irvine et al., 2014	Balaenoptera musculus	Northeast Pacific	1995CA-ST6-00841	34958.1	14.4076	72.1223	100.543
224	Irvine et al., 2014	Balaenoptera musculus	Northeast Pacific	1995CA-ST6-00841	34959.1	14.4767	72.4868	101.042
225	Irvine et al., 2014	Balaenoptera musculus	Northeast Pacific	1995CA-ST6-00841	34960	14.3885	73.0219	101.404
226	Irvine et al., 2014	Balaenoptera musculus	Northeast Pacific	1995CA-ST6-00841	34961.1	14.4129	73.4397	101.87
227	Irvine et al., 2014	Balaenoptera musculus	Northeast Pacific	1995CA-ST6-00841	34962.6	14.4023	73.8941	102.303
228	Irvine et al., 2014	Balaenoptera musculus	Northeast Pacific	1995CA-ST6-00841	34967.1	14.101	76.411	104.226
229	Irvine et al., 2014	Balaenoptera musculus	Northeast Pacific	1995CA-ST6-00841	34968.4	13.8588	77.0847	104.432
230	Irvine et al., 2014	Balaenoptera musculus	Northeast Pacific	1995CA-ST6-00845	34953	14.4119	69.4876	97.9156
231	Irvine et al., 2014	Balaenoptera musculus	Northeast Pacific	1995CA-ST6-00845	34953.1	14.4227	69.8903	98.3356
232	Irvine et al., 2014	Balaenoptera musculus	Northeast Pacific	1995CA-ST6-00845	34954.1	14.2081	70.6087	98.6384
233	Irvine et al., 2014	Balaenoptera musculus	Northeast Pacific	1995CA-ST6-00845	34955.1	13.9731	71.375	98.9585
234	Irvine et al., 2014	Balaenoptera musculus	Northeast Pacific	1995CA-ST6-02082	34974.8	14.4036	79.2148	107.623
235	Irvine et al., 2014	Balaenoptera musculus	Northeast Pacific	1995CA-ST6-02082	34978.7	13.9636	81.3371	108.883
236	Irvine et al., 2014	Balaenoptera musculus	Northeast Pacific	1995CA-ST6-02082	34979.4	13.8674	81.8908	109.238
237	Irvine et al., 2014	Balaenoptera musculus	Northeast Pacific	1995CA-ST6-02082	34986.6	14.1706	84.6697	112.608
238	Irvine et al., 2014	Balaenoptera musculus	Northeast Pacific	1995CA-ST6-02083	34919.9	14.4155	56.1739	84.5769
239	Irvine et al., 2014	Balaenoptera musculus	Northeast Pacific	1995CA-ST6-02083	34920.1	14.3597	56.5708	84.8631
240	Irvine et al., 2014	Balaenoptera musculus	Northeast Pacific	1995CA-ST6-02083	34922.6	14.5158	57.0998	85.705
241	Irvine et al., 2014	Balaenoptera musculus	Northeast Pacific	1995CA-ST6-02083	34926.4	14.4535	58.6535	87.1402
242	Irvine et al., 2014	Balaenoptera musculus	Northeast Pacific	1995CA-ST6-02083	34929.4	14.2611	60.1191	88.2335
243	Irvine et al., 2014	Balaenoptera musculus	Northeast Pacific	1995CA-ST6-02083	34931.9	14.4454	61.037	89.5475
244	Irvine et al., 2014	Balaenoptera musculus	Northeast Pacific	1995CA-ST6-23031	34974.8	14.4241	79.1956	107.644
245	Irvine et al., 2014	Balaenoptera musculus	Northeast Pacific	1995CA-ST6-23031	34975.1	14.2976	79.7564	107.954
246	Irvine et al., 2014	Balaenoptera musculus	Northeast Pacific	1995CA-ST6-23031	34976.4	14.361	80.1436	108.465
247	Irvine et al., 2014	Balaenoptera musculus	Northeast Pacific	1995CA-ST6-23031	34978	14.5357	80.4445	109.106
248	Irvine et al., 2014	Balaenoptera musculus	Northeast Pacific	1995CA-ST6-23031	34979.9	14.0984	81.6811	109.486
249	Irvine et al., 2014	Balaenoptera musculus	Northeast Pacific	1998CA-ST15-00823	36079	17.2429	80.9043	114.859
250	Irvine et al., 2014	Balaenoptera musculus	Northeast Pacific	1998CA-ST15-00823	36079.1	17.1119	81.4885	115.184
251	Irvine et al., 2014	Balaenoptera musculus	Northeast Pacific	1998CA-ST15-00823	36080.1	17.2293	81.8978	115.823
252	Irvine et al., 2014	Balaenoptera musculus	Northeast Pacific	1998CA-ST15-00823	36081.7	17.2803	82.3503	116.375
253	Irvine et al., 2014	Balaenoptera musculus	Northeast Pacific	1998CA-ST15-00823	36082.2	17.2501	82.8678	116.831
254	Irvine et al., 2014	Balaenoptera musculus	Northeast Pacific	1998CA-ST15-00823	36083.5	17.1909	83.3864	117.233
255	Irvine et al., 2014	Balaenoptera musculus	Northeast Pacific	1998CA-ST15-00823	36084.5	17.1107	83.9543	117.639
256	Irvine et al., 2014	Balaenoptera musculus	Northeast Pacific	1998CA-ST15-00823	36086.1	16.5516	85.2344	117.817
257	Irvine et al., 2014	Balaenoptera musculus	Northeast Pacific	1998CA-ST15-00823	36087.6	16.3643	85.7635	117.981
258	Irvine et al., 2014	Balaenoptera musculus	Northeast Pacific	1998CA-ST15-00823	36088.7	15.8799	86.4875	117.753
259	Irvine et al., 2014	Balaenoptera musculus	Northeast Pacific	1998CA-ST15-00823	36090	15.487	87.1577	117.651
260	Irvine et al., 2014	Balaenoptera musculus	Northeast Pacific	1998CA-ST15-00823	36095.5	14.9444	90.0898	119.506
261	Irvine et al., 2014	Balaenoptera musculus	Northeast Pacific	1998CA-ST15-00823	36096.2	14.9254	90.5174	119.895
262	Irvine et al., 2014	Balaenoptera musculus	Northeast Pacific	1998CA-ST15-00823	36097.1	14.831	90.9604	120.153
263	Irvine et al., 2014	Balaenoptera musculus	Northeast Pacific	1998CA-ST15-00823	36099.5	14.2217	91.9521	119.955
264	Irvine et al., 2014	Balaenoptera musculus	Northeast Pacific	1998CA-ST15-00823	36100.2	14.047	92.4541	120.112
265	Irvine et al., 2014	Balaenoptera musculus	Northeast Pacific	1998CA-ST15-00823	36102.6	13.161	93.5915	119.517
266	Irvine et al., 2014	Balaenoptera musculus	Northeast Pacific	1998CA-ST15-00823	36103.6	12.8126	94.0507	119.3
267	Irvine et al., 2014	Balaenoptera musculus	Northeast Pacific	1998CA-ST15-00823	36104.7	12.2044	94.7815	118.835
268	Irvine et al., 2014	Balaenoptera musculus	Northeast Pacific	1998CA-ST15-00823	36106	11.6274	95.413	118.341
269	Irvine et al., 2014	Balaenoptera musculus	Northeast Pacific	1998CA-ST15-00823	36107.5	11.5309	95.9883	118.741
270	Irvine et al., 2014	Balaenoptera musculus	Northeast Pacific	1998CA-ST15-00823	36108.2	11.4934	96.3741	119.049
271	Irvine et al., 2014	Balaenoptera musculus	Northeast Pacific	1998CA-ST15-00823	36110.1	10.8652	97.455	118.891
272	Irvine et al., 2014	Balaenoptera musculus	Northeast Pacific	1998CA-ST15-00823	36111.6	10.4404	98.0141	118.619
273	Irvine et al., 2014	Balaenoptera musculus	Northeast Pacific	1998CA-ST15-00823	36112.5	10.3835	98.3859	118.874
274	Irvine et al., 2014	Balaenoptera musculus	Northeast Pacific	1998CA-ST15-00823	36113.5	10.4986	98.6303	119.34
275	Irvine et al., 2014	Balaenoptera musculus	Northeast Pacific	1998CA-ST15-00823	36114.2	10.4524	98.9763	119.592
276	Irvine et al., 2014	Balaenoptera musculus	Northeast Pacific	1998CA-ST15-00823	36115.1	10.4611	99.2791	119.908
277	Irvine et al., 2014	Balaenoptera musculus	Northeast Pacific	1998CA-ST15-00823	36116.1	10.3907	99.6588	120.143
278	Irvine et al., 2014	Balaenoptera musculus	Northeast Pacific	1998CA-ST15-00823	36117.1	10.4948	99.8442	120.534
279	Irvine et al., 2014	Balaenoptera musculus	Northeast Pacific	1998CA-ST15-00823	36118.1	10.5528	100.074	120.876
280	Irvine et al., 2014	Balaenoptera musculus	Northeast Pacific	1998CA-ST15-00823	36119.1	10.6442	100.293	121.271
281	Irvine et al., 2014	Balaenoptera musculus	Northeast Pacific	1998CA-ST15-00823	36120.1	10.6582	100.58	121.581
282	Irvine et al., 2014	Balaenoptera musculus	Northeast Pacific	1998CA-ST15-00823	36121.5	10.6978	100.838	121.912
283	Irvine et al., 2014	Balaenoptera musculus	Northeast Pacific	1998CA-ST15-00823	36122.5	10.73	101.077	122.211
284	Irvine et al., 2014	Balaenoptera musculus	Northeast Pacific	1998CA-ST15-00823	36123.2	10.7669	101.305	122.509
285	Irvine et al., 2014	Balaenoptera musculus	Northeast Pacific	1998CA-ST15-00823	36124.1	10.8602	101.507	122.891
286	Irvine et al., 2014	Balaenoptera musculus	Northeast Pacific	1998CA-ST15-00823	36125.1	10.9077	101.718	123.192
287	Irvine et al., 2014	Balaenoptera musculus	Northeast Pacific	1998CA-ST15-00823	36126.5	11.0447	101.875	123.614
288	Irvine et al., 2014	Balaenoptera musculus	Northeast Pacific	1998CA-ST15-00823	36127.2	10.9391	102.216	123.741
289	Irvine et al., 2014	Balaenoptera musculus	Northeast Pacific	1998CA-ST15-00823	36128.1	10.9122	102.43	123.9
290	Irvine et al., 2014	Balaenoptera musculus	Northeast Pacific	1998CA-ST15-00823	36129.1	10.9892	102.555	124.177
291	Irvine et al., 2014	Balaenoptera musculus	Northeast Pacific	1998CA-ST15-00823	36130.5	10.8841	102.816	124.229
292	Irvine et al., 2014	Balaenoptera musculus	Northeast Pacific	1998CA-ST15-00823	36131.7	10.8876	103.027	124.441
293	Irvine et al., 2014	Balaenoptera musculus	Northeast Pacific	1998CA-ST15-00823	36132.2	10.867	103.229	124.599
294	Irvine et al., 2014	Balaenoptera musculus	Northeast Pacific	1998CA-ST15-00823	36133.1	10.844	103.423	124.744
295	Irvine et al., 2014	Balaenoptera musculus	Northeast Pacific	1998CA-ST15-00823	36134.1	10.8545	103.587	124.926
296	Irvine et al., 2014	Balaenoptera musculus	Northeast Pacific	1998CA-ST15-00823	36135.5	10.462	103.912	124.482
297	Irvine et al., 2014	Balaenoptera musculus	Northeast Pacific	1998CA-ST15-00823	36136.5	10.4758	104.087	124.678
298	Irvine et al., 2014	Balaenoptera musculus	Northeast Pacific	1998CA-ST15-00823	36137.5	10.3436	104.319	124.646
299	Irvine et al., 2014	Balaenoptera musculus	Northeast Pacific	1998CA-ST15-00823	36138.1	10.3607	104.375	124.737
300	Irvine et al., 2014	Balaenoptera musculus	Northeast Pacific	1998CA-ST15-00823	36139.2	10.3443	104.532	124.857
301	Irvine et al., 2014	Balaenoptera musculus	Northeast Pacific	1998CA-ST15-00824	36019.9	15.2519	56.1345	86.1724
302	Irvine et al., 2014	Balaenoptera musculus	Northeast Pacific	1998CA-ST15-00824	36212.6	11.1636	90.3146	112.065
303	Irvine et al., 2014	Balaenoptera musculus	Northeast Pacific	1998CA-ST15-00824	36231.7	11.2014	82.6702	104.484
304	Irvine et al., 2014	Balaenoptera musculus	Northeast Pacific	1998CA-ST15-00824	36234	11.6534	81.4249	104.127
305	Irvine et al., 2014	Balaenoptera musculus	Northeast Pacific	1998CA-ST15-00824	36234.5	11.5902	81.0788	103.651
306	Irvine et al., 2014	Balaenoptera musculus	Northeast Pacific	1998CA-ST15-00824	36235.5	11.867	80.3956	103.513
307	Irvine et al., 2014	Balaenoptera musculus	Northeast Pacific	1998CA-ST15-00824	36236.5	12.0732	79.7768	103.3
308	Irvine et al., 2014	Balaenoptera musculus	Northeast Pacific	1998CA-ST15-00824	36237.5	12.4749	78.9618	103.276
309	Irvine et al., 2014	Balaenoptera musculus	Northeast Pacific	1998CA-ST15-00824	36238.1	12.41	78.6042	102.782
310	Irvine et al., 2014	Balaenoptera musculus	Northeast Pacific	1998CA-ST15-00824	36239.6	12.8075	77.7769	102.727
311	Irvine et al., 2014	Balaenoptera musculus	Northeast Pacific	1998CA-ST15-00824	36240.7	12.7944	77.3561	102.283
312	Irvine et al., 2014	Balaenoptera musculus	Northeast Pacific	1998CA-ST15-00824	36241.2	12.8876	76.8259	101.935
313	Irvine et al., 2014	Balaenoptera musculus	Northeast Pacific	1998CA-ST15-00824	36242.1	13.1545	76.1104	101.743
314	Irvine et al., 2014	Balaenoptera musculus	Northeast Pacific	1998CA-ST15-00824	36243.2	13.2171	75.6027	101.357
315	Irvine et al., 2014	Balaenoptera musculus	Northeast Pacific	1998CA-ST15-00824	36244.7	13.5741	74.7594	101.208
316	Irvine et al., 2014	Balaenoptera musculus	Northeast Pacific	1998CA-ST15-00824	36245.2	14.1433	73.7447	101.333
317	Irvine et al., 2014	Balaenoptera musculus	Northeast Pacific	1998CA-ST15-00824	36246.7	13.9619	73.5273	100.766
318	Irvine et al., 2014	Balaenoptera musculus	Northeast Pacific	1998CA-ST15-00824	36247.1	13.3716	73.6933	99.7558
319	Irvine et al., 2014	Balaenoptera musculus	Northeast Pacific	1998CA-ST15-00824	36250.7	13.7567	72.0387	98.879
320	Irvine et al., 2014	Balaenoptera musculus	Northeast Pacific	1998CA-ST15-00824	36252	13.9656	71.3648	98.6161
321	Irvine et al., 2014	Balaenoptera musculus	Northeast Pacific	1998CA-ST15-00824	36252.5	13.9515	70.9323	98.1526
322	Irvine et al., 2014	Balaenoptera musculus	Northeast Pacific	1998CA-ST15-00824	36254.2	14.4077	69.5309	97.651
323	Irvine et al., 2014	Balaenoptera musculus	Northeast Pacific	1998CA-ST15-00824	36256.1	15.0461	67.866	97.2436
324	Irvine et al., 2014	Balaenoptera musculus	Northeast Pacific	1998CA-ST15-00824	36257.7	15.2441	67.0942	96.8535
325	Irvine et al., 2014	Balaenoptera musculus	Northeast Pacific	1998CA-ST15-00824	36258.5	15.3507	66.4876	96.4552
326	Irvine et al., 2014	Balaenoptera musculus	Northeast Pacific	1998CA-ST15-00824	36260.5	14.9879	66.0826	95.3355
327	Irvine et al., 2014	Balaenoptera musculus	Northeast Pacific	1998CA-ST15-00826	36020	15.2673	56.099	86.1665
328	Irvine et al., 2014	Balaenoptera musculus	Northeast Pacific	1998CA-ST15-00826	36020.1	15.2773	56.4649	86.5534
329	Irvine et al., 2014	Balaenoptera musculus	Northeast Pacific	1998CA-ST15-00826	36021.1	15.6344	56.4706	87.2727
330	Irvine et al., 2014	Balaenoptera musculus	Northeast Pacific	1998CA-ST15-00826	36022.5	15.545	56.8645	87.4842
331	Irvine et al., 2014	Balaenoptera musculus	Northeast Pacific	1998CA-ST15-00826	36023.2	15.594	57.2802	88.0029
332	Irvine et al., 2014	Balaenoptera musculus	Northeast Pacific	1998CA-ST15-00826	36024.5	15.4629	57.8524	88.3165
333	Irvine et al., 2014	Balaenoptera musculus	Northeast Pacific	1998CA-ST15-00826	36025.1	15.3855	58.3386	88.6494
334	Irvine et al., 2014	Balaenoptera musculus	Northeast Pacific	1998CA-ST15-00826	36026.5	15.4437	58.7178	89.1478
335	Irvine et al., 2014	Balaenoptera musculus	Northeast Pacific	1998CA-ST15-00826	36027.2	15.3673	59.2148	89.4938
336	Irvine et al., 2014	Balaenoptera musculus	Northeast Pacific	1998CA-ST15-00826	36028.2	15.5751	59.3519	90.0429
337	Irvine et al., 2014	Balaenoptera musculus	Northeast Pacific	1998CA-ST15-00826	36029.1	15.5974	59.6427	90.3723
338	Irvine et al., 2014	Balaenoptera musculus	Northeast Pacific	1998CA-ST15-00826	36030.1	15.7945	59.7847	90.9036
339	Irvine et al., 2014	Balaenoptera musculus	Northeast Pacific	1998CA-ST15-00826	36032.1	15.568	61.0525	91.7333
340	Irvine et al., 2014	Balaenoptera musculus	Northeast Pacific	1998CA-ST15-00826	36033.1	15.4351	61.6655	92.0852
341	Irvine et al., 2014	Balaenoptera musculus	Northeast Pacific	1998CA-ST15-00826	36034.1	15.2944	62.2538	92.3945
342	Irvine et al., 2014	Balaenoptera musculus	Northeast Pacific	1998CA-ST15-00826	36035.2	15.1154	62.9162	92.7039
343	Irvine et al., 2014	Balaenoptera musculus	Northeast Pacific	1998CA-ST15-00826	36036.2	14.8616	63.6966	92.986
344	Irvine et al., 2014	Balaenoptera musculus	Northeast Pacific	1998CA-ST15-00826	36037.1	14.7936	64.2449	93.404
345	Irvine et al., 2014	Balaenoptera musculus	Northeast Pacific	1998CA-ST15-00826	36038.1	14.4555	65.106	93.5991
346	Irvine et al., 2014	Balaenoptera musculus	Northeast Pacific	1998CA-ST15-00826	36039.1	14.4149	65.5888	94.0027
347	Irvine et al., 2014	Balaenoptera musculus	Northeast Pacific	1998CA-ST15-00826	36040.7	14.3912	66.0524	94.4206
348	Irvine et al., 2014	Balaenoptera musculus	Northeast Pacific	1998CA-ST15-00826	36041.2	14.3226	66.5654	94.7984
349	Irvine et al., 2014	Balaenoptera musculus	Northeast Pacific	1998CA-ST15-00826	36042.1	14.3662	66.957	95.2779
350	Irvine et al., 2014	Balaenoptera musculus	Northeast Pacific	1998CA-ST15-00826	36043.1	14.3284	67.4659	95.7169
351	Irvine et al., 2014	Balaenoptera musculus	Northeast Pacific	1998CA-ST15-00826	36044.1	14.2497	68.0466	96.1504
352	Irvine et al., 2014	Balaenoptera musculus	Northeast Pacific	1998CA-ST15-00826	36045.5	14.3147	68.3754	96.6038
353	Irvine et al., 2014	Balaenoptera musculus	Northeast Pacific	1998CA-ST15-00826	36046.2	14.2889	68.7894	96.9591
354	Irvine et al., 2014	Balaenoptera musculus	Northeast Pacific	1998CA-ST15-00826	36047.1	14.5692	68.9032	97.6263
355	Irvine et al., 2014	Balaenoptera musculus	Northeast Pacific	1998CA-ST15-00826	36048.1	14.7821	69.0849	98.2255
356	Irvine et al., 2014	Balaenoptera musculus	Northeast Pacific	1998CA-ST15-00826	36049.5	14.7974	69.5277	98.701
357	Irvine et al., 2014	Balaenoptera musculus	Northeast Pacific	1998CA-ST15-00826	36050.2	14.7642	70.0095	99.1168
358	Irvine et al., 2014	Balaenoptera musculus	Northeast Pacific	1998CA-ST15-00826	36051.1	14.7853	70.4306	99.5789
359	Irvine et al., 2014	Balaenoptera musculus	Northeast Pacific	1998CA-ST15-00826	36052.2	14.7363	70.9291	99.9795
360	Irvine et al., 2014	Balaenoptera musculus	Northeast Pacific	1998CA-ST15-00826	36053.5	14.9183	71.1852	100.596
361	Irvine et al., 2014	Balaenoptera musculus	Northeast Pacific	1998CA-ST15-00826	36055	14.8604	71.6898	100.984
362	Irvine et al., 2014	Balaenoptera musculus	Northeast Pacific	1998CA-ST15-00826	36055.2	14.8438	72.1614	101.423
363	Irvine et al., 2014	Balaenoptera musculus	Northeast Pacific	1998CA-ST15-00826	36056.1	14.676	72.8048	101.739
364	Irvine et al., 2014	Balaenoptera musculus	Northeast Pacific	1998CA-ST15-00827	36033.9	14.0906	63.6723	91.4616
365	Irvine et al., 2014	Balaenoptera musculus	Northeast Pacific	1998CA-ST15-00827	36051.1	14.3046	71.0272	99.2411
366	Irvine et al., 2014	Balaenoptera musculus	Northeast Pacific	1998CA-ST15-00833	36031.9	13.7874	63.1967	90.3811
367	Irvine et al., 2014	Balaenoptera musculus	Northeast Pacific	1998CA-ST15-00833	36032.2	13.7878	63.5963	90.7819
368	Irvine et al., 2014	Balaenoptera musculus	Northeast Pacific	1998CA-ST15-00833	36033.1	13.8499	63.9316	91.2414
369	Irvine et al., 2014	Balaenoptera musculus	Northeast Pacific	1998CA-ST15-00833	36034.1	14.0526	64.1373	91.8534
370	Irvine et al., 2014	Balaenoptera musculus	Northeast Pacific	1998CA-ST15-00833	36035.2	14.0656	64.5283	92.2705
371	Irvine et al., 2014	Balaenoptera musculus	Northeast Pacific	1998CA-ST15-00833	36036.2	14.0732	64.9444	92.7038
372	Irvine et al., 2014	Balaenoptera musculus	Northeast Pacific	1998CA-ST15-00833	36037.2	13.9899	65.4793	93.0772
373	Irvine et al., 2014	Balaenoptera musculus	Northeast Pacific	1998CA-ST15-00833	36038.1	13.7747	66.1036	93.2712
374	Irvine et al., 2014	Balaenoptera musculus	Northeast Pacific	1998CA-ST15-00833	36039.7	13.8321	66.4273	93.7057
375	Irvine et al., 2014	Balaenoptera musculus	Northeast Pacific	1998CA-ST15-00833	36040.7	13.6763	66.9716	93.9354
376	Irvine et al., 2014	Balaenoptera musculus	Northeast Pacific	1998CA-ST15-00833	36041.2	13.0932	68.0466	93.8541
377	Irvine et al., 2014	Balaenoptera musculus	Northeast Pacific	1998CA-ST15-00833	36042.1	13.5003	68.1705	94.8087
378	Irvine et al., 2014	Balaenoptera musculus	Northeast Pacific	1998CA-ST15-00833	36043.2	13.3409	68.6658	94.9731
379	Irvine et al., 2014	Balaenoptera musculus	Northeast Pacific	1998CA-ST15-00833	36044.2	13.0671	69.3543	95.1131
380	Irvine et al., 2014	Balaenoptera musculus	Northeast Pacific	1998CA-ST15-00833	36045.1	12.8597	69.9761	95.3188
381	Irvine et al., 2014	Balaenoptera musculus	Northeast Pacific	1998CA-ST15-00833	36046.2	13.526	69.704	96.3738
382	Irvine et al., 2014	Balaenoptera musculus	Northeast Pacific	1998CA-ST15-00833	36047.1	13.8562	69.8113	97.1433
383	Irvine et al., 2014	Balaenoptera musculus	Northeast Pacific	1998CA-ST15-01390	36035.9	15.5437	62.3304	92.9614
384	Irvine et al., 2014	Balaenoptera musculus	Northeast Pacific	1998CA-ST15-01390	36036.7	15.6536	62.5905	93.4362
385	Irvine et al., 2014	Balaenoptera musculus	Northeast Pacific	1998CA-ST15-04174	36031.9	13.7658	63.2176	90.3587
386	Irvine et al., 2014	Balaenoptera musculus	Northeast Pacific	1998CA-ST15-04174	36032.2	13.7146	63.6735	90.7132
387	Irvine et al., 2014	Balaenoptera musculus	Northeast Pacific	1998CA-ST15-04174	36033.1	13.8385	63.9703	91.2601
388	Irvine et al., 2014	Balaenoptera musculus	Northeast Pacific	1998CA-ST15-04174	36034.7	13.9789	64.2214	91.7912
389	Irvine et al., 2014	Balaenoptera musculus	Northeast Pacific	1998CA-ST15-04174	36035.2	13.8625	64.7519	92.09
390	Irvine et al., 2014	Balaenoptera musculus	Northeast Pacific	1998CA-ST15-04174	36036.1	13.9785	65.0454	92.616
391	Irvine et al., 2014	Balaenoptera musculus	Northeast Pacific	1998CA-ST15-04174	36037.2	13.9817	65.4604	93.0388
392	Irvine et al., 2014	Balaenoptera musculus	Northeast Pacific	1998CA-ST15-04174	36038.1	13.5773	66.317	93.0915
393	Irvine et al., 2014	Balaenoptera musculus	Northeast Pacific	1998CA-ST15-04174	36039.1	13.5386	66.7439	93.4387
394	Irvine et al., 2014	Balaenoptera musculus	Northeast Pacific	1998CA-ST15-04174	36040.5	14.1305	66.4931	94.3613
395	Irvine et al., 2014	Balaenoptera musculus	Northeast Pacific	1998CA-ST15-04174	36042.1	13.7907	67.7405	94.9387
396	Irvine et al., 2014	Balaenoptera musculus	Northeast Pacific	1998CA-ST15-04174	36043.2	13.9536	68.0041	95.5291
397	Irvine et al., 2014	Balaenoptera musculus	Northeast Pacific	1998CA-ST15-04174	36044.2	13.8494	68.5436	95.8621
398	Irvine et al., 2014	Balaenoptera musculus	Northeast Pacific	1998CA-ST15-04174	36045.1	13.9199	68.8958	96.3551
399	Irvine et al., 2014	Balaenoptera musculus	Northeast Pacific	1998CA-ST15-04174	36046.1	13.8464	69.3955	96.7079
400	Irvine et al., 2014	Balaenoptera musculus	Northeast Pacific	1998CA-ST15-04174	36047.1	13.8902	69.7736	97.1727
401	Irvine et al., 2014	Balaenoptera musculus	Northeast Pacific	1998CA-ST15-04174	36048.6	14.0436	70.0403	97.7444
402	Irvine et al., 2014	Balaenoptera musculus	Northeast Pacific	1998CA-ST15-04174	36049.7	14.178	70.29	98.2529
403	Irvine et al., 2014	Balaenoptera musculus	Northeast Pacific	1998CA-ST15-04174	36050.2	13.7742	71.1855	98.3539
404	Irvine et al., 2014	Balaenoptera musculus	Northeast Pacific	1998CA-ST15-04174	36052	13.9545	71.4431	98.9734
405	Irvine et al., 2014	Balaenoptera musculus	Northeast Pacific	1998CA-ST15-04174	36052.2	13.8593	71.9753	99.3166
406	Irvine et al., 2014	Balaenoptera musculus	Northeast Pacific	1998CA-ST15-04174	36053.1	13.6608	72.631	99.5833
407	Irvine et al., 2014	Balaenoptera musculus	Northeast Pacific	1998CA-ST15-04174	36054.1	13.0256	73.737	99.4344
408	Irvine et al., 2014	Balaenoptera musculus	Northeast Pacific	1998CA-ST15-04174	36055.5	12.7577	74.4503	99.6201
409	Irvine et al., 2014	Balaenoptera musculus	Northeast Pacific	1998CA-ST15-04174	36056.5	12.6732	74.9807	99.9928
410	Irvine et al., 2014	Balaenoptera musculus	Northeast Pacific	1998CA-ST15-04174	36057.1	12.5621	75.543	100.354
411	Irvine et al., 2014	Balaenoptera musculus	Northeast Pacific	1998CA-ST15-04174	36059.7	11.8446	77.1066	100.502
412	Irvine et al., 2014	Balaenoptera musculus	Northeast Pacific	1998CA-ST15-04174	36060.1	11.6685	77.6911	100.727
413	Irvine et al., 2014	Balaenoptera musculus	Northeast Pacific	1998CA-ST15-04174	36061.1	11.8029	77.9692	101.267
414	Irvine et al., 2014	Balaenoptera musculus	Northeast Pacific	1998CA-ST15-04174	36064	12.4945	78.1116	102.787
415	Irvine et al., 2014	Balaenoptera musculus	Northeast Pacific	1998CA-ST15-04174	36064.7	12.3793	78.6471	103.088
416	Irvine et al., 2014	Balaenoptera musculus	Northeast Pacific	1998CA-ST15-04174	36065.7	12.4984	78.9493	103.624
417	Irvine et al., 2014	Balaenoptera musculus	Northeast Pacific	1998CA-ST15-04174	36066.7	12.4368	79.4361	103.983
418	Irvine et al., 2014	Balaenoptera musculus	Northeast Pacific	1998CA-ST15-04174	36067.2	12.3714	79.9064	104.333
419	Irvine et al., 2014	Balaenoptera musculus	Northeast Pacific	1998CA-ST15-04174	36068.1	11.8986	80.7667	104.265
420	Irvine et al., 2014	Balaenoptera musculus	Northeast Pacific	1998CA-ST15-04174	36069.1	11.4621	81.575	104.222
421	Irvine et al., 2014	Balaenoptera musculus	Northeast Pacific	1998CA-ST15-04174	36070.1	11.1683	82.2438	104.319
422	Irvine et al., 2014	Balaenoptera musculus	Northeast Pacific	1998CA-ST15-04174	36071.5	10.8549	82.9004	104.377
423	Irvine et al., 2014	Balaenoptera musculus	Northeast Pacific	1998CA-ST15-04174	36072.6	10.6448	83.4901	104.553
424	Irvine et al., 2014	Balaenoptera musculus	Northeast Pacific	1998CA-ST15-04174	36073.5	10.6867	83.8391	104.987
425	Irvine et al., 2014	Balaenoptera musculus	Northeast Pacific	1998CA-ST15-04174	36074.1	10.4735	84.4314	105.158
426	Irvine et al., 2014	Balaenoptera musculus	Northeast Pacific	1998CA-ST15-04174	36075.2	10.5358	84.7546	105.608
427	Irvine et al., 2014	Balaenoptera musculus	Northeast Pacific	1998CA-ST15-04174	36076.2	10.5044	85.177	105.967
428	Irvine et al., 2014	Balaenoptera musculus	Northeast Pacific	1998CA-ST15-04174	36077.1	10.4977	85.5726	106.349
429	Irvine et al., 2014	Balaenoptera musculus	Northeast Pacific	1998CA-ST15-04174	36078.1	10.5006	85.9603	106.741
430	Irvine et al., 2014	Balaenoptera musculus	Northeast Pacific	1998CA-ST15-04174	36079.7	10.5307	86.3185	107.159
431	Irvine et al., 2014	Balaenoptera musculus	Northeast Pacific	1998CA-ST15-04174	36080.5	10.5145	86.7279	107.534
432	Irvine et al., 2014	Balaenoptera musculus	Northeast Pacific	1998CA-ST15-04174	36082.2	10.5385	87.4838	108.335
433	Irvine et al., 2014	Balaenoptera musculus	Northeast Pacific	1998CA-ST15-04174	36083.1	10.6856	87.7597	108.895
434	Irvine et al., 2014	Balaenoptera musculus	Northeast Pacific	1998CA-ST15-04174	36084.1	10.4938	88.3371	109.088
435	Irvine et al., 2014	Balaenoptera musculus	Northeast Pacific	1998CA-ST15-04174	36085.5	10.4479	88.7631	109.423
436	Irvine et al., 2014	Balaenoptera musculus	Northeast Pacific	1998CA-ST15-04174	36086.1	10.4747	89.1257	109.836
437	Irvine et al., 2014	Balaenoptera musculus	Northeast Pacific	1998CA-ST15-04174	36087.2	10.535	89.442	110.273
438	Irvine et al., 2014	Balaenoptera musculus	Northeast Pacific	1998CA-ST15-04174	36088.1	10.4542	89.9015	110.57
439	Irvine et al., 2014	Balaenoptera musculus	Northeast Pacific	1998CA-ST15-04174	36089.5	10.4091	90.3248	110.903
440	Irvine et al., 2014	Balaenoptera musculus	Northeast Pacific	1998CA-ST15-04174	36090.2	10.587	90.5108	111.446
441	Irvine et al., 2014	Balaenoptera musculus	Northeast Pacific	1998CA-ST15-04174	36091.2	10.4146	91.0649	111.653
442	Irvine et al., 2014	Balaenoptera musculus	Northeast Pacific	1998CA-ST15-04174	36092.1	10.488	91.3399	112.078
443	Irvine et al., 2014	Balaenoptera musculus	Northeast Pacific	1998CA-ST15-04174	36093.1	10.359	91.8746	112.347
444	Irvine et al., 2014	Balaenoptera musculus	Northeast Pacific	1998CA-ST15-04174	36094.1	10.3256	92.2799	112.684
445	Irvine et al., 2014	Balaenoptera musculus	Northeast Pacific	1998CA-ST15-04174	36095.7	11.0029	92.1654	113.893
446	Irvine et al., 2014	Balaenoptera musculus	Northeast Pacific	1998CA-ST15-04174	36097.1	10.6491	93.1499	114.182
447	Irvine et al., 2014	Balaenoptera musculus	Northeast Pacific	1998CA-ST15-04174	36099.2	10.489	93.973	114.691
448	Irvine et al., 2014	Balaenoptera musculus	Northeast Pacific	1998CA-ST15-04174	36100.1	10.42	94.3749	114.956
449	Irvine et al., 2014	Balaenoptera musculus	Northeast Pacific	1998CA-ST15-04174	36102.7	9.79969	95.4813	114.849
450	Irvine et al., 2014	Balaenoptera musculus	Northeast Pacific	1998CA-ST15-04174	36104.7	9.70214	96.098	115.291
451	Irvine et al., 2014	Balaenoptera musculus	Northeast Pacific	1998CA-ST15-04174	36105.7	9.74826	96.4907	115.759
452	Irvine et al., 2014	Balaenoptera musculus	Northeast Pacific	1998CA-ST15-04174	36106.1	9.47606	97.0372	115.767
453	Irvine et al., 2014	Balaenoptera musculus	Northeast Pacific	1998CA-ST15-04175	36078.8	17.2108	80.9237	114.816
454	Irvine et al., 2014	Balaenoptera musculus	Northeast Pacific	1998CA-ST15-04175	36079.7	17.6028	81.1693	115.829
455	Irvine et al., 2014	Balaenoptera musculus	Northeast Pacific	1998CA-ST15-04175	36080.5	17.2835	81.8568	115.889
456	Irvine et al., 2014	Balaenoptera musculus	Northeast Pacific	1998CA-ST15-04175	36081.7	16.825	82.6544	115.784
457	Irvine et al., 2014	Balaenoptera musculus	Northeast Pacific	1998CA-ST15-04175	36082.2	16.8178	83.1628	116.275
458	Irvine et al., 2014	Balaenoptera musculus	Northeast Pacific	1998CA-ST15-04175	36083.1	16.8031	83.6372	116.72
459	Irvine et al., 2014	Balaenoptera musculus	Northeast Pacific	1998CA-ST15-04175	36084.1	16.7175	84.1814	117.094
460	Irvine et al., 2014	Balaenoptera musculus	Northeast Pacific	1998CA-ST15-04175	36085.5	16.5622	84.7615	117.366
461	Irvine et al., 2014	Balaenoptera musculus	Northeast Pacific	1998CA-ST15-04175	36086.5	16.5455	85.2332	117.805
462	Irvine et al., 2014	Balaenoptera musculus	Northeast Pacific	1998CA-ST15-04175	36087.2	16.6883	85.5961	118.449
463	Irvine et al., 2014	Balaenoptera musculus	Northeast Pacific	1998CA-ST15-04175	36088.1	16.5557	86.18	118.767
464	Irvine et al., 2014	Balaenoptera musculus	Northeast Pacific	1998CA-ST15-04175	36089.1	16.7012	86.5154	119.391
465	Irvine et al., 2014	Balaenoptera musculus	Northeast Pacific	1998CA-ST15-04175	36090.5	16.5158	87.0364	119.549
466	Irvine et al., 2014	Balaenoptera musculus	Northeast Pacific	1998CA-ST15-04175	36091.2	16.253	87.5982	119.595
467	Irvine et al., 2014	Balaenoptera musculus	Northeast Pacific	1998CA-ST15-04175	36092.2	15.8208	88.2908	119.436
468	Irvine et al., 2014	Balaenoptera musculus	Northeast Pacific	1998CA-ST15-04175	36093.1	15.7341	88.8059	119.777
469	Irvine et al., 2014	Balaenoptera musculus	Northeast Pacific	1998CA-ST15-04175	36094.6	15.6998	89.2636	120.166
470	Irvine et al., 2014	Balaenoptera musculus	Northeast Pacific	1998CA-ST15-04175	36095.1	15.8877	89.6038	120.874
471	Irvine et al., 2014	Balaenoptera musculus	Northeast Pacific	1998CA-ST15-04175	36096.2	16.2766	89.9628	121.989
472	Irvine et al., 2014	Balaenoptera musculus	Northeast Pacific	1998CA-ST15-04175	36097.1	16.7238	90.1701	123.076
473	Irvine et al., 2014	Balaenoptera musculus	Northeast Pacific	1998CA-ST15-04175	36098.6	16.8536	90.6107	123.767
474	Irvine et al., 2014	Balaenoptera musculus	Northeast Pacific	1998CA-ST15-04175	36099.2	16.6588	91.1128	123.885
475	Irvine et al., 2014	Balaenoptera musculus	Northeast Pacific	1998CA-ST15-04175	36100.5	16.6429	91.5349	124.275
476	Irvine et al., 2014	Balaenoptera musculus	Northeast Pacific	1998CA-ST15-04175	36101.2	16.5311	92.019	124.537
477	Irvine et al., 2014	Balaenoptera musculus	Northeast Pacific	1998CA-ST15-04175	36102.1	16.757	92.3158	125.278
478	Irvine et al., 2014	Balaenoptera musculus	Northeast Pacific	1998CA-ST15-04175	36103.5	16.9348	92.6461	125.958
479	Irvine et al., 2014	Balaenoptera musculus	Northeast Pacific	1998CA-ST15-04175	36105	16.5775	93.1067	125.718
480	Irvine et al., 2014	Balaenoptera musculus	Northeast Pacific	1998CA-ST15-04175	36105.1	16.5221	93.5566	126.056
481	Irvine et al., 2014	Balaenoptera musculus	Northeast Pacific	1998CA-ST15-04175	36106.1	16.1529	94.0564	125.829
482	Irvine et al., 2014	Balaenoptera musculus	Northeast Pacific	1998CA-ST15-04175	36107.2	16.6937	94.2331	127.07
483	Irvine et al., 2014	Balaenoptera musculus	Northeast Pacific	1998CA-ST15-04175	36108.2	16.4111	94.65	126.932
484	Irvine et al., 2014	Balaenoptera musculus	Northeast Pacific	1998CA-ST15-04175	36109.5	15.6537	95.3225	126.111
485	Irvine et al., 2014	Balaenoptera musculus	Northeast Pacific	1998CA-ST15-04175	36110.5	15.3924	95.6211	125.903
486	Irvine et al., 2014	Balaenoptera musculus	Northeast Pacific	1998CA-ST15-04175	36111.1	15.2521	95.7626	125.782
487	Irvine et al., 2014	Balaenoptera musculus	Northeast Pacific	1998CA-ST15-04175	36112.6	14.4155	96.6438	125.006
488	Irvine et al., 2014	Balaenoptera musculus	Northeast Pacific	1998CA-ST15-04175	36113.5	14.4845	96.7949	125.3
489	Irvine et al., 2014	Balaenoptera musculus	Northeast Pacific	1998CA-ST15-04175	36114.2	14.1943	97.3083	125.238
490	Irvine et al., 2014	Balaenoptera musculus	Northeast Pacific	1998CA-ST15-04175	36115.1	13.9617	97.6797	125.154
491	Irvine et al., 2014	Balaenoptera musculus	Northeast Pacific	1998CA-ST15-04175	36116.6	13.4823	98.2022	124.733
492	Irvine et al., 2014	Balaenoptera musculus	Northeast Pacific	1998CA-ST15-04175	36117.5	13.2989	98.5489	124.72
493	Irvine et al., 2014	Balaenoptera musculus	Northeast Pacific	1998CA-ST15-04175	36118.2	12.8297	99.0754	124.322
494	Irvine et al., 2014	Balaenoptera musculus	Northeast Pacific	1998CA-ST15-04175	36119.6	12.2261	99.5969	123.662
495	Irvine et al., 2014	Balaenoptera musculus	Northeast Pacific	1998CA-ST15-04175	36120.1	12.2487	99.7552	123.87
496	Irvine et al., 2014	Balaenoptera musculus	Northeast Pacific	1998CA-ST15-04175	36121.6	11.4704	100.482	123.064
497	Irvine et al., 2014	Balaenoptera musculus	Northeast Pacific	1998CA-ST15-04175	36122.5	11.1852	100.869	122.892
498	Irvine et al., 2014	Balaenoptera musculus	Northeast Pacific	1998CA-ST15-04175	36123.2	10.971	101.2	122.804
499	Irvine et al., 2014	Balaenoptera musculus	Northeast Pacific	1998CA-ST15-04175	36124.2	10.7399	101.493	122.649
500	Irvine et al., 2014	Balaenoptera musculus	Northeast Pacific	1998CA-ST15-04175	36125.1	10.5402	101.79	122.557
501	Irvine et al., 2014	Balaenoptera musculus	Northeast Pacific	1998CA-ST15-04175	36126.5	10.6102	101.996	122.896
502	Irvine et al., 2014	Balaenoptera musculus	Northeast Pacific	1998CA-ST15-04175	36127.5	10.5289	102.32	123.052
503	Irvine et al., 2014	Balaenoptera musculus	Northeast Pacific	1998CA-ST15-04175	36128.1	10.4442	102.649	123.205
504	Irvine et al., 2014	Balaenoptera musculus	Northeast Pacific	1998CA-ST15-04175	36129.1	10.5428	102.73	123.484
505	Irvine et al., 2014	Balaenoptera musculus	Northeast Pacific	1998CA-ST15-04175	36130.5	10.6448	102.835	123.789
506	Irvine et al., 2014	Balaenoptera musculus	Northeast Pacific	1998CA-ST15-04175	36131.7	10.5237	103.094	123.808
507	Irvine et al., 2014	Balaenoptera musculus	Northeast Pacific	1998CA-ST15-04175	36132.2	10.4722	103.284	123.895
508	Irvine et al., 2014	Balaenoptera musculus	Northeast Pacific	1998CA-ST15-04175	36133.7	10.4259	103.517	124.032
509	Irvine et al., 2014	Balaenoptera musculus	Northeast Pacific	1998CA-ST15-04175	36134.1	10.306	103.806	124.077
510	Irvine et al., 2014	Balaenoptera musculus	Northeast Pacific	1998CA-ST15-04175	36135.6	10.4344	103.782	124.311
511	Irvine et al., 2014	Balaenoptera musculus	Northeast Pacific	1998CA-ST15-04175	36137.2	10.444	104.084	124.624
512	Irvine et al., 2014	Balaenoptera musculus	Northeast Pacific	1998CA-ST15-04175	36138.1	10.3602	104.249	124.622
513	Irvine et al., 2014	Balaenoptera musculus	Northeast Pacific	1998CA-ST15-04175	36139.2	10.4551	104.293	124.851
514	Irvine et al., 2014	Balaenoptera musculus	Northeast Pacific	1998CA-ST15-10823	36038.9	13.5393	66.3533	93.0516
515	Irvine et al., 2014	Balaenoptera musculus	Northeast Pacific	1998CA-ST15-10823	36039.1	13.8043	66.5088	93.7384
516	Irvine et al., 2014	Balaenoptera musculus	Northeast Pacific	1998CA-ST15-10823	36040.5	13.9514	66.7237	94.241
517	Irvine et al., 2014	Balaenoptera musculus	Northeast Pacific	1998CA-ST15-10823	36041.2	13.5392	67.6098	94.3102
518	Irvine et al., 2014	Balaenoptera musculus	Northeast Pacific	1998CA-ST15-10823	36042.1	13.9785	67.578	95.1557
519	Irvine et al., 2014	Balaenoptera musculus	Northeast Pacific	1998CA-ST15-10823	36043.2	14.034	67.9511	95.641
520	Irvine et al., 2014	Balaenoptera musculus	Northeast Pacific	1998CA-ST15-10823	36044.2	13.8595	68.5468	95.8877
521	Irvine et al., 2014	Balaenoptera musculus	Northeast Pacific	1998CA-ST15-10823	36045.1	13.8399	68.9952	96.2979
522	Irvine et al., 2014	Balaenoptera musculus	Northeast Pacific	1998CA-ST15-10823	36046.1	13.9252	69.3395	96.8139
523	Irvine et al., 2014	Balaenoptera musculus	Northeast Pacific	1998CA-ST15-10823	36047.1	13.8274	69.8488	97.1247
524	Irvine et al., 2014	Balaenoptera musculus	Northeast Pacific	1998CA-ST15-10823	36048.6	14.3117	69.7114	97.9394
525	Irvine et al., 2014	Balaenoptera musculus	Northeast Pacific	1998CA-ST15-10823	36049.5	14.4482	69.9683	98.4609
526	Irvine et al., 2014	Balaenoptera musculus	Northeast Pacific	1998CA-ST15-10823	36050.2	14.4263	70.4208	98.8677
527	Irvine et al., 2014	Balaenoptera musculus	Northeast Pacific	1998CA-ST15-10823	36051.2	14.3552	70.9214	99.2236
528	Irvine et al., 2014	Balaenoptera musculus	Northeast Pacific	1998CA-ST15-10823	36052.2	14.3197	71.3987	99.6295
529	Irvine et al., 2014	Balaenoptera musculus	Northeast Pacific	1998CA-ST15-10823	36053.5	14.4712	71.7027	100.239
530	Irvine et al., 2014	Balaenoptera musculus	Northeast Pacific	1998CA-ST15-10823	36055	14.4437	72.15	100.624
531	Irvine et al., 2014	Balaenoptera musculus	Northeast Pacific	1998CA-ST15-10823	36055.2	14.5279	72.5162	101.159
532	Irvine et al., 2014	Balaenoptera musculus	Northeast Pacific	1998CA-ST15-10823	36056.1	14.7856	72.6806	101.829
533	Irvine et al., 2014	Balaenoptera musculus	Northeast Pacific	1998CA-ST15-10823	36057.1	14.8603	73.0453	102.336
534	Irvine et al., 2014	Balaenoptera musculus	Northeast Pacific	1998CA-ST15-10823	36058.7	14.7483	73.6248	102.697
535	Irvine et al., 2014	Balaenoptera musculus	Northeast Pacific	1998CA-ST15-10823	36059.5	14.5783	74.273	103.024
536	Irvine et al., 2014	Balaenoptera musculus	Northeast Pacific	1998CA-ST15-10823	36060.2	14.4981	74.8156	103.423
537	Irvine et al., 2014	Balaenoptera musculus	Northeast Pacific	1998CA-ST15-10823	36062.5	14.3799	75.8147	104.188
538	Irvine et al., 2014	Balaenoptera musculus	Northeast Pacific	1998CA-ST15-10823	36063.7	13.9984	76.636	104.241
539	Irvine et al., 2014	Balaenoptera musculus	Northeast Pacific	1998CA-ST15-10823	36065.5	14.0005	77.5156	105.126
540	Irvine et al., 2014	Balaenoptera musculus	Northeast Pacific	1998CA-ST15-10823	36066.6	13.6755	78.2671	105.238
541	Irvine et al., 2014	Balaenoptera musculus	Northeast Pacific	1998CA-ST15-10823	36067.2	14.1907	78.2178	106.202
542	Irvine et al., 2014	Balaenoptera musculus	Northeast Pacific	1998CA-ST15-10823	36068.2	14.2321	78.6146	106.684
543	Irvine et al., 2014	Balaenoptera musculus	Northeast Pacific	1998CA-ST15-10823	36069.2	13.7462	79.5507	106.644
544	Irvine et al., 2014	Balaenoptera musculus	Northeast Pacific	1998CA-ST15-10823	36070.1	13.9328	79.7764	107.253
545	Irvine et al., 2014	Balaenoptera musculus	Northeast Pacific	1998CA-ST15-10823	36071.5	13.8518	80.2888	107.605
546	Irvine et al., 2014	Balaenoptera musculus	Northeast Pacific	1998CA-ST15-10823	36072.5	13.7623	80.7878	107.933
547	Irvine et al., 2014	Balaenoptera musculus	Northeast Pacific	1998CA-ST15-10823	36073.2	13.9375	81.082	108.568
548	Irvine et al., 2014	Balaenoptera musculus	Northeast Pacific	1998CA-ST15-10823	36074.1	13.989	81.4982	109.079
549	Irvine et al., 2014	Balaenoptera musculus	Northeast Pacific	1998CA-ST15-10823	36076.2	14.1939	82.1975	110.18
550	Irvine et al., 2014	Balaenoptera musculus	Northeast Pacific	1998CA-ST15-10823	36077.2	14.1078	82.7092	110.522
551	Irvine et al., 2014	Balaenoptera musculus	Northeast Pacific	1998CA-ST15-10823	36078.2	13.9143	83.2936	110.727
552	Irvine et al., 2014	Balaenoptera musculus	Northeast Pacific	1998CA-ST15-10823	36079.1	13.7594	83.8517	110.979
553	Irvine et al., 2014	Balaenoptera musculus	Northeast Pacific	1998CA-ST15-10823	36081	14.0512	84.0143	111.72
554	Irvine et al., 2014	Balaenoptera musculus	Northeast Pacific	1998CA-ST15-10823	36081.7	13.8882	84.6277	112.004
555	Irvine et al., 2014	Balaenoptera musculus	Northeast Pacific	1998CA-ST15-10823	36082.5	13.8791	85.1263	112.475
556	Irvine et al., 2014	Balaenoptera musculus	Northeast Pacific	1998CA-ST15-10823	36083.1	14.1276	85.3104	113.155
557	Irvine et al., 2014	Balaenoptera musculus	Northeast Pacific	1998CA-ST15-10823	36084.2	14.176	85.7014	113.64
558	Irvine et al., 2014	Balaenoptera musculus	Northeast Pacific	1998CA-ST15-10823	36085.1	14.1307	86.1674	114.016
559	Irvine et al., 2014	Balaenoptera musculus	Northeast Pacific	1998CA-ST15-10823	36086.1	14.1612	86.5756	114.482
560	Irvine et al., 2014	Balaenoptera musculus	Northeast Pacific	1998CA-ST15-10823	36087.1	14.2078	86.9754	114.972
561	Irvine et al., 2014	Balaenoptera musculus	Northeast Pacific	1998CA-ST15-10823	36088.1	14.1494	87.4397	115.32
562	Irvine et al., 2014	Balaenoptera musculus	Northeast Pacific	1998CA-ST15-10823	36089.5	14.0863	87.8945	115.651
563	Irvine et al., 2014	Balaenoptera musculus	Northeast Pacific	1998CA-ST15-10823	36090.7	14.1256	88.301	116.132
564	Irvine et al., 2014	Balaenoptera musculus	Northeast Pacific	1998CA-ST15-10823	36091.2	14.1012	88.7427	116.524
565	Irvine et al., 2014	Balaenoptera musculus	Northeast Pacific	1998CA-ST15-10823	36092.1	13.8063	89.3532	116.553
566	Irvine et al., 2014	Balaenoptera musculus	Northeast Pacific	1998CA-ST15-10823	36093.6	12.5616	90.8117	115.54
567	Irvine et al., 2014	Balaenoptera musculus	Northeast Pacific	1998CA-ST15-10823	36095	12.638	90.8972	115.803
568	Irvine et al., 2014	Balaenoptera musculus	Northeast Pacific	1998CA-ST15-10823	36096.2	12.448	91.748	116.284
569	Irvine et al., 2014	Balaenoptera musculus	Northeast Pacific	1998CA-ST15-10823	36097.7	11.7986	92.5424	115.804
570	Irvine et al., 2014	Balaenoptera musculus	Northeast Pacific	1998CA-ST15-10823	36098.6	11.7398	92.9609	116.105
571	Irvine et al., 2014	Balaenoptera musculus	Northeast Pacific	1998CA-ST15-10823	36099.2	12.0761	93.0362	116.847
572	Irvine et al., 2014	Balaenoptera musculus	Northeast Pacific	1998CA-ST15-10823	36100.2	11.6136	93.8311	116.72
573	Irvine et al., 2014	Balaenoptera musculus	Northeast Pacific	1998CA-ST15-10823	36101.1	11.8917	93.9152	117.359
574	Irvine et al., 2014	Balaenoptera musculus	Northeast Pacific	1998CA-ST15-10823	36102.1	11.665	94.6025	117.581
575	Irvine et al., 2014	Balaenoptera musculus	Northeast Pacific	1998CA-ST15-10823	36105.7	11.4939	95.5224	118.186
576	Irvine et al., 2014	Balaenoptera musculus	Northeast Pacific	1998CA-ST15-10823	36106.7	11.2201	95.9658	118.099
577	Irvine et al., 2014	Balaenoptera musculus	Northeast Pacific	1998CA-ST15-10823	36107.7	11.0608	96.3656	118.189
578	Irvine et al., 2014	Balaenoptera musculus	Northeast Pacific	1998CA-ST15-10823	36108.1	10.8988	96.8146	118.317
579	Irvine et al., 2014	Balaenoptera musculus	Northeast Pacific	1998CA-ST15-10823	36109.2	10.7903	97.1945	118.484
580	Irvine et al., 2014	Balaenoptera musculus	Northeast Pacific	1998CA-ST15-10823	36111.1	9.94524	98.5749	118.181
581	Irvine et al., 2014	Balaenoptera musculus	Northeast Pacific	1998CA-ST15-10823	36112.7	9.84655	98.8767	118.296
582	Irvine et al., 2014	Balaenoptera musculus	Northeast Pacific	1998CA-ST15-10823	36113.7	9.93252	99.0679	118.66
583	Irvine et al., 2014	Balaenoptera musculus	Northeast Pacific	1998CA-ST15-10823	36114.2	9.88556	99.3538	118.857
584	Irvine et al., 2014	Balaenoptera musculus	Northeast Pacific	1998CA-ST15-10823	36115.7	9.89432	99.3855	118.935
585	Irvine et al., 2014	Balaenoptera musculus	Northeast Pacific	1998CA-ST15-10823	36116.1	9.62427	99.9326	118.941
586	Irvine et al., 2014	Balaenoptera musculus	Northeast Pacific	1998CA-ST15-10823	36118	10.1824	99.7001	119.817
587	Irvine et al., 2014	Balaenoptera musculus	Northeast Pacific	1998CA-ST15-10823	36118.2	9.91846	100.242	119.828
588	Irvine et al., 2014	Balaenoptera musculus	Northeast Pacific	1998CA-ST15-10823	36119.1	10.2945	100.222	120.547
589	Irvine et al., 2014	Balaenoptera musculus	Northeast Pacific	1998CA-ST15-10823	36120.7	11.3723	99.9126	122.338
590	Irvine et al., 2014	Balaenoptera musculus	Northeast Pacific	1998CA-ST15-10823	36121.6	10.6181	100.682	121.621
591	Irvine et al., 2014	Balaenoptera musculus	Northeast Pacific	1998CA-ST15-10823	36122.5	10.5305	101.077	121.832
592	Irvine et al., 2014	Balaenoptera musculus	Northeast Pacific	1998CA-ST15-10823	36123.7	10.4616	101.464	122.072
593	Irvine et al., 2014	Balaenoptera musculus	Northeast Pacific	1998CA-ST15-10823	36124.2	10.7838	101.532	122.767
594	Irvine et al., 2014	Balaenoptera musculus	Northeast Pacific	1998CA-ST15-10823	36126.1	10.6469	102.135	123.091
595	Irvine et al., 2014	Balaenoptera musculus	Northeast Pacific	1998CA-ST15-10823	36127.2	10.3764	102.57	122.987
596	Irvine et al., 2014	Balaenoptera musculus	Northeast Pacific	1998CA-ST15-10823	36128.1	9.83334	103.212	122.551
597	Irvine et al., 2014	Balaenoptera musculus	Northeast Pacific	1998CA-ST15-10823	36129.5	9.35303	103.831	122.212
598	Irvine et al., 2014	Balaenoptera musculus	Northeast Pacific	1998CA-ST15-10823	36132	9.01098	104.41	122.116
599	Irvine et al., 2014	Balaenoptera musculus	Northeast Pacific	1998CA-ST15-10823	36135.6	8.06673	105.329	121.212
600	Irvine et al., 2014	Balaenoptera musculus	Northeast Pacific	1998CA-ST15-10823	36136.5	7.90211	105.576	121.135
601	Irvine et al., 2014	Balaenoptera musculus	Northeast Pacific	1998CA-ST15-10823	36138.1	7.64248	105.921	120.978
602	Irvine et al., 2014	Balaenoptera musculus	Northeast Pacific	1998CA-ST15-10823	36141	6.91039	106.649	120.271
603	Irvine et al., 2014	Balaenoptera musculus	Northeast Pacific	1998CA-ST15-10823	36142.1	6.74755	106.942	120.241
604	Irvine et al., 2014	Balaenoptera musculus	Northeast Pacific	1998CA-ST15-10823	36144.6	6.77542	106.944	120.315
605	Irvine et al., 2014	Balaenoptera musculus	Northeast Pacific	1998CA-ST15-10823	36146.2	6.68388	107.044	120.247
606	Irvine et al., 2014	Balaenoptera musculus	Northeast Pacific	1998CA-ST15-10823	36156.7	5.42645	108.213	118.891
607	Irvine et al., 2014	Balaenoptera musculus	Northeast Pacific	1998CA-ST15-10823	36158.5	5.4479	108.093	118.804
608	Irvine et al., 2014	Balaenoptera musculus	Northeast Pacific	1998CA-ST15-10823	36164.7	6.84574	106.241	119.704
609	Irvine et al., 2014	Balaenoptera musculus	Northeast Pacific	1998CA-ST15-10823	36205.7	5.76727	97.1781	108.351
610	Irvine et al., 2014	Balaenoptera musculus	Northeast Pacific	1999CA-ST15-00830	36362.8	14.1815	50.8761	78.7669
611	Irvine et al., 2014	Balaenoptera musculus	Northeast Pacific	1999CA-ST15-00830	36363.2	14.1807	51.1392	79.0318
612	Irvine et al., 2014	Balaenoptera musculus	Northeast Pacific	1999CA-ST15-00830	36364.1	14.0844	51.5765	79.283
613	Irvine et al., 2014	Balaenoptera musculus	Northeast Pacific	1999CA-ST15-00830	36365.5	14.1084	51.7369	79.4901
614	Irvine et al., 2014	Balaenoptera musculus	Northeast Pacific	1999CA-ST15-00830	36366.5	14.1117	52.0113	79.7741
615	Irvine et al., 2014	Balaenoptera musculus	Northeast Pacific	1999CA-ST15-00830	36367.5	13.6478	52.7871	79.6261
616	Irvine et al., 2014	Balaenoptera musculus	Northeast Pacific	1999CA-ST15-00830	36368.7	14.1823	52.4809	80.3887
617	Irvine et al., 2014	Balaenoptera musculus	Northeast Pacific	1999CA-ST15-00830	36369.1	14.1657	52.8238	80.7026
618	Irvine et al., 2014	Balaenoptera musculus	Northeast Pacific	1999CA-ST15-00830	36370.7	14.1681	53.0421	80.924
619	Irvine et al., 2014	Balaenoptera musculus	Northeast Pacific	1999CA-ST15-00830	36371.7	14.1533	53.4451	81.3041
620	Irvine et al., 2014	Balaenoptera musculus	Northeast Pacific	1999CA-ST15-00830	36372.2	14.1779	53.739	81.6499
621	Irvine et al., 2014	Balaenoptera musculus	Northeast Pacific	1999CA-ST15-00830	36373	14.1809	54.0445	81.9633
622	Irvine et al., 2014	Balaenoptera musculus	Northeast Pacific	1999CA-ST15-00830	36374.5	14.2962	54.2406	82.3914
623	Irvine et al., 2014	Balaenoptera musculus	Northeast Pacific	1999CA-ST15-00830	36375.7	14.1732	54.8172	82.7311
624	Irvine et al., 2014	Balaenoptera musculus	Northeast Pacific	1999CA-ST15-00830	36376.2	14.2	55.1277	83.0977
625	Irvine et al., 2014	Balaenoptera musculus	Northeast Pacific	1999CA-ST15-00830	36379.7	14.6423	55.6787	84.5371
626	Irvine et al., 2014	Balaenoptera musculus	Northeast Pacific	1999CA-ST15-00830	36380.6	14.803	55.6901	84.861
627	Irvine et al., 2014	Balaenoptera musculus	Northeast Pacific	1999CA-ST15-00830	36381.2	14.9471	55.8854	85.3451
628	Irvine et al., 2014	Balaenoptera musculus	Northeast Pacific	1999CA-ST15-00830	36382	14.8664	56.4007	85.7055
629	Irvine et al., 2014	Balaenoptera musculus	Northeast Pacific	1999CA-ST15-00830	36383.7	14.4376	57.3219	85.779
630	Irvine et al., 2014	Balaenoptera musculus	Northeast Pacific	1999CA-ST15-00830	36385.2	14.2899	58.2078	86.3727
631	Irvine et al., 2014	Balaenoptera musculus	Northeast Pacific	1999CA-ST15-00830	36386.2	14.3598	58.5436	86.8519
632	Irvine et al., 2014	Balaenoptera musculus	Northeast Pacific	1999CA-ST15-00830	36387.2	14.4446	58.8949	87.3785
633	Irvine et al., 2014	Balaenoptera musculus	Northeast Pacific	1999CA-ST15-00830	36390.5	14.2854	59.9627	88.115
634	Irvine et al., 2014	Balaenoptera musculus	Northeast Pacific	1999CA-ST15-00830	36392	14.1745	60.5466	88.4844
635	Irvine et al., 2014	Balaenoptera musculus	Northeast Pacific	1999CA-ST15-00830	36393	14.1752	60.937	88.877
636	Irvine et al., 2014	Balaenoptera musculus	Northeast Pacific	1999CA-ST15-00830	36394	14.1703	61.3298	89.2604
637	Irvine et al., 2014	Balaenoptera musculus	Northeast Pacific	1999CA-ST15-00832	36364.8	14.1799	51.3973	79.2907
638	Irvine et al., 2014	Balaenoptera musculus	Northeast Pacific	1999CA-ST15-00834	36370.8	14.1731	53.1093	81.005
639	Irvine et al., 2014	Balaenoptera musculus	Northeast Pacific	1999CA-ST15-00834	36371.1	14.1775	53.4071	81.3138
640	Irvine et al., 2014	Balaenoptera musculus	Northeast Pacific	1999CA-ST15-00834	36372.5	13.9096	53.9891	81.3626
641	Irvine et al., 2014	Balaenoptera musculus	Northeast Pacific	1999CA-ST15-00834	36373.5	13.9608	54.2402	81.7175
642	Irvine et al., 2014	Balaenoptera musculus	Northeast Pacific	1999CA-ST15-00834	36374.5	13.9174	54.6435	82.0381
643	Irvine et al., 2014	Balaenoptera musculus	Northeast Pacific	1999CA-ST15-00834	36376.1	13.8549	55.4078	82.6841
644	Irvine et al., 2014	Balaenoptera musculus	Northeast Pacific	1999CA-ST15-00834	36377.1	14.1826	55.356	83.2862
645	Irvine et al., 2014	Balaenoptera musculus	Northeast Pacific	1999CA-ST15-00834	36378.1	14.1828	55.6962	83.6286
646	Irvine et al., 2014	Balaenoptera musculus	Northeast Pacific	1999CA-ST15-00834	36380.1	14.1777	56.4007	84.3268
647	Irvine et al., 2014	Balaenoptera musculus	Northeast Pacific	1999CA-ST15-00834	36381.1	14.1933	56.7199	84.6777
648	Irvine et al., 2014	Balaenoptera musculus	Northeast Pacific	1999CA-ST15-00834	36382.1	14.1888	57.078	85.0282
649	Irvine et al., 2014	Balaenoptera musculus	Northeast Pacific	1999CA-ST15-00834	36383.5	13.9392	57.7422	85.1982
650	Irvine et al., 2014	Balaenoptera musculus	Northeast Pacific	1999CA-ST15-00834	36384.1	14.1554	57.8892	85.7788
651	Irvine et al., 2014	Balaenoptera musculus	Northeast Pacific	1999CA-ST15-00834	36385.1	14.1734	58.2544	86.1822
652	Irvine et al., 2014	Balaenoptera musculus	Northeast Pacific	1999CA-ST15-00834	36386.1	14.1733	58.6232	86.552
653	Irvine et al., 2014	Balaenoptera musculus	Northeast Pacific	1999CA-ST15-00834	36388.1	14.177	59.3586	87.2961
654	Irvine et al., 2014	Balaenoptera musculus	Northeast Pacific	1999CA-ST15-00834	36389.1	14.1519	59.7506	87.6379
655	Irvine et al., 2014	Balaenoptera musculus	Northeast Pacific	1999CA-ST15-00834	36390.1	14.1526	60.1838	88.0773
656	Irvine et al., 2014	Balaenoptera musculus	Northeast Pacific	1999CA-ST15-00834	36391.1	14.0588	60.6705	88.3777
657	Irvine et al., 2014	Balaenoptera musculus	Northeast Pacific	1999CA-ST15-00834	36392.4	14.1853	60.8814	88.8382
658	Irvine et al., 2014	Balaenoptera musculus	Northeast Pacific	1999CA-ST15-00834	36394.1	13.5666	62.388	89.1169
659	Irvine et al., 2014	Balaenoptera musculus	Northeast Pacific	1999CA-ST15-00834	36395.1	14.0491	62.2384	89.9276
660	Irvine et al., 2014	Balaenoptera musculus	Northeast Pacific	1999CA-ST15-00834	36396.5	14.0626	62.6644	90.3845
661	Irvine et al., 2014	Balaenoptera musculus	Northeast Pacific	1999CA-ST15-00834	36398.1	13.712	63.849	90.8713
662	Irvine et al., 2014	Balaenoptera musculus	Northeast Pacific	1999CA-ST15-00834	36399.1	14.1447	63.7794	91.6631
663	Irvine et al., 2014	Balaenoptera musculus	Northeast Pacific	1999CA-ST15-00834	36400.5	13.6807	64.7034	91.6646
664	Irvine et al., 2014	Balaenoptera musculus	Northeast Pacific	1999CA-ST15-00834	36401.5	13.7426	65.0507	92.1357
665	Irvine et al., 2014	Balaenoptera musculus	Northeast Pacific	1999CA-ST15-00834	36402.5	14.3573	64.7987	93.1073
666	Irvine et al., 2014	Balaenoptera musculus	Northeast Pacific	1999CA-ST15-00834	36403.1	14.2007	65.3569	93.3506
667	Irvine et al., 2014	Balaenoptera musculus	Northeast Pacific	1999CA-ST15-00834	36406.1	14.2209	66.5908	94.6237
668	Irvine et al., 2014	Balaenoptera musculus	Northeast Pacific	1999CA-ST15-00834	36407.1	14.2749	66.938	95.0755
669	Irvine et al., 2014	Balaenoptera musculus	Northeast Pacific	1999CA-ST15-00834	36408.1	14.4774	67.143	95.6825
670	Irvine et al., 2014	Balaenoptera musculus	Northeast Pacific	1999CA-ST15-00834	36409.5	14.4134	67.6639	96.0787
671	Irvine et al., 2014	Balaenoptera musculus	Northeast Pacific	1999CA-ST15-00834	36411.4	14.2773	68.6833	96.8279
672	Irvine et al., 2014	Balaenoptera musculus	Northeast Pacific	1999CA-ST15-00834	36415.5	15.5042	68.9887	99.544
673	Irvine et al., 2014	Balaenoptera musculus	Northeast Pacific	1999CA-ST15-00834	36416.1	15.5081	69.4474	100.011
674	Irvine et al., 2014	Balaenoptera musculus	Northeast Pacific	1999CA-ST15-00834	36417.1	15.4966	69.9276	100.469
675	Irvine et al., 2014	Balaenoptera musculus	Northeast Pacific	1999CA-ST15-00834	36420.1	15.8802	70.8841	102.179
676	Irvine et al., 2014	Balaenoptera musculus	Northeast Pacific	1999CA-ST15-00834	36422.1	15.0609	72.7545	102.452
677	Irvine et al., 2014	Balaenoptera musculus	Northeast Pacific	1999CA-ST15-00834	36423.5	14.9839	73.313	102.873
678	Irvine et al., 2014	Balaenoptera musculus	Northeast Pacific	1999CA-ST15-00834	36424.1	14.6884	74.0682	103.046
679	Irvine et al., 2014	Balaenoptera musculus	Northeast Pacific	1999CA-ST15-00834	36425.1	14.5292	74.6825	103.355
680	Irvine et al., 2014	Balaenoptera musculus	Northeast Pacific	1999CA-ST15-00834	36426.5	13.9972	75.6581	103.276
681	Irvine et al., 2014	Balaenoptera musculus	Northeast Pacific	1999CA-ST15-00834	36429.1	13.736	77.2154	104.332
682	Irvine et al., 2014	Balaenoptera musculus	Northeast Pacific	1999CA-ST15-00834	36435.5	14.7678	78.905	108.028
683	Irvine et al., 2014	Balaenoptera musculus	Northeast Pacific	1999CA-ST15-00834	36440.1	12.2172	83.2956	107.409
684	Irvine et al., 2014	Balaenoptera musculus	Northeast Pacific	1999CA-ST15-00834	36443.1	11.8298	84.8368	108.194
685	Irvine et al., 2014	Balaenoptera musculus	Northeast Pacific	1999CA-ST15-00834	36444.1	11.7498	85.2912	108.495
686	Irvine et al., 2014	Balaenoptera musculus	Northeast Pacific	1999CA-ST15-00834	36445.5	11.4052	85.9815	108.508
687	Irvine et al., 2014	Balaenoptera musculus	Northeast Pacific	1999CA-ST15-00834	36448.1	10.8359	87.632	109.042
688	Irvine et al., 2014	Balaenoptera musculus	Northeast Pacific	1999CA-ST15-00834	36450.5	10.9064	88.3255	109.878
689	Irvine et al., 2014	Balaenoptera musculus	Northeast Pacific	1999CA-ST15-00834	36452.1	10.931	89.0732	110.673
690	Irvine et al., 2014	Balaenoptera musculus	Northeast Pacific	1999CA-ST15-00834	36453.5	10.8121	89.5214	110.893
691	Irvine et al., 2014	Balaenoptera musculus	Northeast Pacific	1999CA-ST15-00834	36454.5	10.7063	89.9783	111.143
692	Irvine et al., 2014	Balaenoptera musculus	Northeast Pacific	1999CA-ST15-00834	36455.4	10.6215	90.4418	111.436
693	Irvine et al., 2014	Balaenoptera musculus	Northeast Pacific	1999CA-ST15-00834	36456.1	10.5962	90.8371	111.781
694	Irvine et al., 2014	Balaenoptera musculus	Northeast Pacific	1999CA-ST15-00834	36457.1	10.3396	91.4416	111.875
695	Irvine et al., 2014	Balaenoptera musculus	Northeast Pacific	1999CA-ST15-00834	36459.5	10.5874	91.9901	112.908
696	Irvine et al., 2014	Balaenoptera musculus	Northeast Pacific	1999CA-ST15-00834	36460.1	10.3293	92.5982	113.002
697	Irvine et al., 2014	Balaenoptera musculus	Northeast Pacific	1999CA-ST15-00834	36461.5	10.859	92.5201	113.969
698	Irvine et al., 2014	Balaenoptera musculus	Northeast Pacific	1999CA-ST15-00834	36462.1	10.8268	92.9129	114.297
699	Irvine et al., 2014	Balaenoptera musculus	Northeast Pacific	1999CA-ST15-00834	36463.1	10.6105	93.458	114.413
700	Irvine et al., 2014	Balaenoptera musculus	Northeast Pacific	1999CA-ST15-00834	36464.8	10.9191	93.5641	115.128
701	Irvine et al., 2014	Balaenoptera musculus	Northeast Pacific	1999CA-ST15-00834	36465.5	10.8467	93.9369	115.362
702	Irvine et al., 2014	Balaenoptera musculus	Northeast Pacific	1999CA-ST15-00834	36466.2	10.767	94.4154	115.673
703	Irvine et al., 2014	Balaenoptera musculus	Northeast Pacific	1999CA-ST15-00834	36467	10.7893	94.7458	116.047
704	Irvine et al., 2014	Balaenoptera musculus	Northeast Pacific	1999CA-ST15-00834	36468.7	10.8242	95.08	116.446
705	Irvine et al., 2014	Balaenoptera musculus	Northeast Pacific	1999CA-ST15-00834	36469.6	10.8882	95.3855	116.875
706	Irvine et al., 2014	Balaenoptera musculus	Northeast Pacific	1999CA-ST15-00834	36471.1	10.9193	96.0506	117.597
707	Irvine et al., 2014	Balaenoptera musculus	Northeast Pacific	1999CA-ST15-00834	36472.4	10.8504	96.44	117.849
708	Irvine et al., 2014	Balaenoptera musculus	Northeast Pacific	1999CA-ST15-00834	36473.1	10.9366	96.6774	118.258
709	Irvine et al., 2014	Balaenoptera musculus	Northeast Pacific	1999CA-ST15-00834	36474.1	10.8575	97.0999	118.518
710	Irvine et al., 2014	Balaenoptera musculus	Northeast Pacific	1999CA-ST15-00834	36475.1	10.8366	97.3937	118.774
711	Irvine et al., 2014	Balaenoptera musculus	Northeast Pacific	1999CA-ST15-00834	36476.1	10.7613	97.719	118.954
712	Irvine et al., 2014	Balaenoptera musculus	Northeast Pacific	1999CA-ST15-00834	36478.1	10.7785	98.3287	119.593
713	Irvine et al., 2014	Balaenoptera musculus	Northeast Pacific	1999CA-ST15-00834	36479.1	10.7798	98.6238	119.89
714	Irvine et al., 2014	Balaenoptera musculus	Northeast Pacific	1999CA-ST15-00834	36480.9	10.7094	99.0267	120.146
715	Irvine et al., 2014	Balaenoptera musculus	Northeast Pacific	1999CA-ST15-00834	36481.1	10.7056	99.3661	120.471
716	Irvine et al., 2014	Balaenoptera musculus	Northeast Pacific	1999CA-ST15-00834	36482.1	10.7929	99.5975	120.871
717	Irvine et al., 2014	Balaenoptera musculus	Northeast Pacific	1999CA-ST15-00834	36483.7	11.0683	99.7136	121.525
718	Irvine et al., 2014	Balaenoptera musculus	Northeast Pacific	1999CA-ST15-00834	36484.7	10.7895	100.193	121.452
719	Irvine et al., 2014	Balaenoptera musculus	Northeast Pacific	1999CA-ST15-00834	36485.7	10.944	100.361	121.921
720	Irvine et al., 2014	Balaenoptera musculus	Northeast Pacific	1999CA-ST15-00834	36486.1	10.8353	100.709	122.052
721	Irvine et al., 2014	Balaenoptera musculus	Northeast Pacific	1999CA-ST15-00837	36373.7	14.1521	54.0739	81.935
722	Irvine et al., 2014	Balaenoptera musculus	Northeast Pacific	1999CA-ST15-00837	36375.1	14.1787	54.7003	82.6192
723	Irvine et al., 2014	Balaenoptera musculus	Northeast Pacific	1999CA-ST15-00837	36376.1	14.1156	55.0732	82.8668
724	Irvine et al., 2014	Balaenoptera musculus	Northeast Pacific	1999CA-ST15-00837	36381.1	14.2923	56.6306	84.7869
725	Irvine et al., 2014	Balaenoptera musculus	Northeast Pacific	1999CA-ST15-00837	36382.5	14.034	57.2771	84.9203
726	Irvine et al., 2014	Balaenoptera musculus	Northeast Pacific	1999CA-ST15-00837	36383.5	14.0659	57.609	85.3176
727	Irvine et al., 2014	Balaenoptera musculus	Northeast Pacific	1999CA-ST15-00837	36387.1	13.5291	59.9285	86.5906
728	Irvine et al., 2014	Balaenoptera musculus	Northeast Pacific	1999CA-ST15-00837	36388.1	13.8285	60.0589	87.325
729	Irvine et al., 2014	Balaenoptera musculus	Northeast Pacific	1999CA-ST15-00837	36389.1	13.3753	61.0898	87.4674
730	Irvine et al., 2014	Balaenoptera musculus	Northeast Pacific	1999CA-ST15-00837	36391.5	13.5598	61.5312	88.2692
731	Irvine et al., 2014	Balaenoptera musculus	Northeast Pacific	1999CA-ST15-00837	36393.1	13.4501	62.4223	88.9441
732	Irvine et al., 2014	Balaenoptera musculus	Northeast Pacific	1999CA-ST15-00837	36399.1	13.8491	64.2633	91.574
733	Irvine et al., 2014	Balaenoptera musculus	Northeast Pacific	1999CA-ST15-00837	36401.5	13.9292	64.9516	92.4186
734	Irvine et al., 2014	Balaenoptera musculus	Northeast Pacific	1999CA-ST15-00837	36407.1	13.5381	67.9856	94.6919
735	Irvine et al., 2014	Balaenoptera musculus	Northeast Pacific	1999CA-ST15-00837	36415.1	13.966	70.8716	98.4186
736	Irvine et al., 2014	Balaenoptera musculus	Northeast Pacific	1999CA-ST15-00837	36416.1	13.8878	71.3966	98.7909
737	Irvine et al., 2014	Balaenoptera musculus	Northeast Pacific	1999CA-ST15-00837	36417.1	13.929	71.7741	99.2469
738	Irvine et al., 2014	Balaenoptera musculus	Northeast Pacific	1999CA-ST15-00837	36420.5	13.9059	73.113	100.542
739	Irvine et al., 2014	Balaenoptera musculus	Northeast Pacific	1999CA-ST15-00837	36423.1	13.7601	74.5753	101.716
740	Irvine et al., 2014	Balaenoptera musculus	Northeast Pacific	1999CA-ST15-00837	36426.1	14.1277	75.5139	103.375
741	Irvine et al., 2014	Balaenoptera musculus	Northeast Pacific	1999CA-ST15-00837	36428.5	14.588	75.9456	104.701
742	Irvine et al., 2014	Balaenoptera musculus	Northeast Pacific	1999CA-ST15-00837	36429.1	14.6021	76.3856	105.167
743	Irvine et al., 2014	Balaenoptera musculus	Northeast Pacific	1999CA-ST15-00837	36431.1	14.9219	76.9919	106.399
744	Irvine et al., 2014	Balaenoptera musculus	Northeast Pacific	1999CA-ST15-00837	36434.1	15.6257	77.7411	108.527
745	Irvine et al., 2014	Balaenoptera musculus	Northeast Pacific	1999CA-ST15-00838	36435.9	14.2581	79.3806	107.495
746	Irvine et al., 2014	Balaenoptera musculus	Northeast Pacific	1999CA-ST15-00838	36442.6	14.5113	82.2477	110.858
747	Irvine et al., 2014	Balaenoptera musculus	Northeast Pacific	1999CA-ST15-00838	36443.6	14.2394	82.9385	111.008
748	Irvine et al., 2014	Balaenoptera musculus	Northeast Pacific	1999CA-ST15-00838	36446.6	14.2781	84.213	112.357
749	Irvine et al., 2014	Balaenoptera musculus	Northeast Pacific	1999CA-ST15-00838	36447.6	14.1656	84.7461	112.666
750	Irvine et al., 2014	Balaenoptera musculus	Northeast Pacific	1999CA-ST15-00838	36449.6	14.2541	85.5416	113.634
751	Irvine et al., 2014	Balaenoptera musculus	Northeast Pacific	1999CA-ST15-00838	36451.6	14.2847	86.3772	114.528
752	Irvine et al., 2014	Balaenoptera musculus	Northeast Pacific	1999CA-ST15-00838	36456.6	14.3585	88.4613	116.749
753	Irvine et al., 2014	Balaenoptera musculus	Northeast Pacific	1999CA-ST15-00838	36458.6	14.3863	89.3039	117.641
754	Irvine et al., 2014	Balaenoptera musculus	Northeast Pacific	1999CA-ST15-00838	36461.6	14.3266	90.6334	118.844
755	Irvine et al., 2014	Balaenoptera musculus	Northeast Pacific	1999CA-ST15-00838	36462.6	14.4351	90.9882	119.41
756	Irvine et al., 2014	Balaenoptera musculus	Northeast Pacific	1999CA-ST15-00838	36463.6	14.326	91.4598	119.665
757	Irvine et al., 2014	Balaenoptera musculus	Northeast Pacific	1999CA-ST15-00838	36464.1	14.366	91.8294	120.113
758	Irvine et al., 2014	Balaenoptera musculus	Northeast Pacific	1999CA-ST15-00838	36465.6	14.4531	92.231	120.68
759	Irvine et al., 2014	Balaenoptera musculus	Northeast Pacific	1999CA-ST15-00838	36469.1	14.3399	93.826	122.047
760	Irvine et al., 2014	Balaenoptera musculus	Northeast Pacific	1999CA-ST15-00838	36470.6	14.2429	94.2726	122.3
761	Irvine et al., 2014	Balaenoptera musculus	Northeast Pacific	1999CA-ST15-00838	36471.1	14.3439	94.5893	122.814
762	Irvine et al., 2014	Balaenoptera musculus	Northeast Pacific	1999CA-ST15-00838	36472.6	14.3348	94.9416	123.148
763	Irvine et al., 2014	Balaenoptera musculus	Northeast Pacific	1999CA-ST15-00838	36473.6	14.1845	95.3953	123.303
764	Irvine et al., 2014	Balaenoptera musculus	Northeast Pacific	1999CA-ST15-00838	36474.6	14.0041	95.9021	123.449
765	Irvine et al., 2014	Balaenoptera musculus	Northeast Pacific	1999CA-ST15-00838	36475.1	13.8567	96.405	123.655
766	Irvine et al., 2014	Balaenoptera musculus	Northeast Pacific	1999CA-ST15-00838	36476.1	13.648	96.9162	123.75
767	Irvine et al., 2014	Balaenoptera musculus	Northeast Pacific	1999CA-ST15-00838	36477.6	13.6424	97.2925	124.111
768	Irvine et al., 2014	Balaenoptera musculus	Northeast Pacific	1999CA-ST15-00838	36478.5	13.4047	97.7375	124.087
769	Irvine et al., 2014	Balaenoptera musculus	Northeast Pacific	1999CA-ST15-00838	36479.6	13.5316	97.7756	124.387
770	Irvine et al., 2014	Balaenoptera musculus	Northeast Pacific	1999CA-ST15-00838	36480.1	13.28	98.2157	124.33
771	Irvine et al., 2014	Balaenoptera musculus	Northeast Pacific	1999CA-ST15-00838	36481.1	13.1535	98.4624	124.335
772	Irvine et al., 2014	Balaenoptera musculus	Northeast Pacific	1999CA-ST15-00838	36482.9	12.4123	99.0851	123.502
773	Irvine et al., 2014	Balaenoptera musculus	Northeast Pacific	1999CA-ST15-00838	36487.6	11.5727	100.739	123.511
774	Irvine et al., 2014	Balaenoptera musculus	Northeast Pacific	1999CA-ST15-00838	36489.6	11.1375	101.452	123.366
775	Irvine et al., 2014	Balaenoptera musculus	Northeast Pacific	1999CA-ST15-00838	36490.1	11.1341	101.662	123.569
776	Irvine et al., 2014	Balaenoptera musculus	Northeast Pacific	1999CA-ST15-00838	36491.4	10.9765	102.05	123.64
777	Irvine et al., 2014	Balaenoptera musculus	Northeast Pacific	1999CA-ST15-00838	36492.6	10.95	102.183	123.727
778	Irvine et al., 2014	Balaenoptera musculus	Northeast Pacific	1999CA-ST15-00838	36493.6	10.6389	102.546	123.479
779	Irvine et al., 2014	Balaenoptera musculus	Northeast Pacific	1999CA-ST15-00838	36495.5	10.6656	102.914	123.896
780	Irvine et al., 2014	Balaenoptera musculus	Northeast Pacific	1999CA-ST15-00838	36498.1	10.2642	103.703	123.888
781	Irvine et al., 2014	Balaenoptera musculus	Northeast Pacific	1999CA-ST15-00838	36499.4	9.87779	104.243	123.654
782	Irvine et al., 2014	Balaenoptera musculus	Northeast Pacific	1999CA-ST15-00838	36500.6	9.71008	104.474	123.555
783	Irvine et al., 2014	Balaenoptera musculus	Northeast Pacific	1999CA-ST15-00838	36502.6	9.51912	104.992	123.681
784	Irvine et al., 2014	Balaenoptera musculus	Northeast Pacific	1999CA-ST15-00838	36503.6	9.67007	105.058	124.037
785	Irvine et al., 2014	Balaenoptera musculus	Northeast Pacific	1999CA-ST15-00838	36504.6	9.52468	105.338	124.023
786	Irvine et al., 2014	Balaenoptera musculus	Northeast Pacific	1999CA-ST15-00838	36505.6	9.46845	105.644	124.201
787	Irvine et al., 2014	Balaenoptera musculus	Northeast Pacific	1999CA-ST15-00838	36508.6	9.81423	105.792	125.014
788	Irvine et al., 2014	Balaenoptera musculus	Northeast Pacific	1999CA-ST15-00838	36514.5	10.215	106.042	126.021
789	Irvine et al., 2014	Balaenoptera musculus	Northeast Pacific	1999CA-ST15-00838	36515.5	10.2255	106.033	126.03
790	Irvine et al., 2014	Balaenoptera musculus	Northeast Pacific	1999CA-ST15-00838	36517.1	10.3189	105.845	126.03
791	Irvine et al., 2014	Balaenoptera musculus	Northeast Pacific	1999CA-ST15-00838	36518.6	10.3567	105.902	126.151
792	Irvine et al., 2014	Balaenoptera musculus	Northeast Pacific	1999CA-ST15-00838	36520.1	10.2594	105.817	125.874
793	Irvine et al., 2014	Balaenoptera musculus	Northeast Pacific	1999CA-ST15-00838	36521.1	10.0299	106.002	125.596
794	Irvine et al., 2014	Balaenoptera musculus	Northeast Pacific	1999CA-ST15-00838	36522.9	9.98272	105.831	125.341
795	Irvine et al., 2014	Balaenoptera musculus	Northeast Pacific	1999CA-ST15-00838	36523.6	9.96206	105.87	125.329
796	Irvine et al., 2014	Balaenoptera musculus	Northeast Pacific	1999CA-ST15-00838	36524.5	10.082	105.744	125.434
797	Irvine et al., 2014	Balaenoptera musculus	Northeast Pacific	1999CA-ST15-00838	36526.4	10.0477	105.597	125.213
798	Irvine et al., 2014	Balaenoptera musculus	Northeast Pacific	1999CA-ST15-00838	36527.6	10.143	105.452	125.253
799	Irvine et al., 2014	Balaenoptera musculus	Northeast Pacific	1999CA-ST15-00838	36529.5	10.2898	105.162	125.243
800	Irvine et al., 2014	Balaenoptera musculus	Northeast Pacific	1999CA-ST15-00838	36530.5	10.3817	105.005	125.263
801	Irvine et al., 2014	Balaenoptera musculus	Northeast Pacific	1999CA-ST15-00838	36532.9	10.7129	104.6	125.501
802	Irvine et al., 2014	Balaenoptera musculus	Northeast Pacific	1999CA-ST15-00838	36534.6	10.9046	104.189	125.461
803	Irvine et al., 2014	Balaenoptera musculus	Northeast Pacific	1999CA-ST15-00838	36535.1	10.7633	104.127	125.115
804	Irvine et al., 2014	Balaenoptera musculus	Northeast Pacific	1999CA-ST15-00838	36536.6	10.9052	103.804	125.073
805	Irvine et al., 2014	Balaenoptera musculus	Northeast Pacific	1999CA-ST15-00838	36538.6	10.9055	103.473	124.733
806	Irvine et al., 2014	Balaenoptera musculus	Northeast Pacific	1999CA-ST15-00838	36539.1	10.9271	103.237	124.538
807	Irvine et al., 2014	Balaenoptera musculus	Northeast Pacific	1999CA-ST15-00838	36540.9	10.9497	102.987	124.332
808	Irvine et al., 2014	Balaenoptera musculus	Northeast Pacific	1999CA-ST15-00838	36541.6	10.9119	102.81	124.076
809	Irvine et al., 2014	Balaenoptera musculus	Northeast Pacific	1999CA-ST15-00838	36542.1	10.9395	102.529	123.849
810	Irvine et al., 2014	Balaenoptera musculus	Northeast Pacific	1999CA-ST15-00838	36543.1	10.8577	102.344	123.499
811	Irvine et al., 2014	Balaenoptera musculus	Northeast Pacific	1999CA-ST15-00838	36544.6	10.7367	102.192	123.105
812	Irvine et al., 2014	Balaenoptera musculus	Northeast Pacific	1999CA-ST15-00838	36545.4	10.8998	101.816	123.05
813	Irvine et al., 2014	Balaenoptera musculus	Northeast Pacific	1999CA-ST15-00838	36546.6	10.9402	101.536	122.847
814	Irvine et al., 2014	Balaenoptera musculus	Northeast Pacific	1999CA-ST15-00838	36548.6	10.9723	100.999	122.368
815	Irvine et al., 2014	Balaenoptera musculus	Northeast Pacific	1999CA-ST15-00838	36549.1	10.9134	100.745	121.996
816	Irvine et al., 2014	Balaenoptera musculus	Northeast Pacific	1999CA-ST15-00838	36550.5	10.9385	100.393	121.695
817	Irvine et al., 2014	Balaenoptera musculus	Northeast Pacific	1999CA-ST15-00838	36551.1	10.5626	100.401	120.954
818	Irvine et al., 2014	Balaenoptera musculus	Northeast Pacific	1999CA-ST15-00838	36552.1	10.8852	99.7596	120.958
819	Irvine et al., 2014	Balaenoptera musculus	Northeast Pacific	1999CA-ST15-00838	36553.1	10.7756	99.5351	120.515
820	Irvine et al., 2014	Balaenoptera musculus	Northeast Pacific	1999CA-ST15-00838	36554.6	10.8294	99.1977	120.281
821	Irvine et al., 2014	Balaenoptera musculus	Northeast Pacific	1999CA-ST15-00838	36555.6	10.789	98.9361	119.937
822	Irvine et al., 2014	Balaenoptera musculus	Northeast Pacific	1999CA-ST15-00838	36556.1	10.9249	98.5304	119.797
823	Irvine et al., 2014	Balaenoptera musculus	Northeast Pacific	1999CA-ST15-00838	36557.1	10.847	98.2571	119.368
824	Irvine et al., 2014	Balaenoptera musculus	Northeast Pacific	1999CA-ST15-00838	36558.5	10.7473	97.9504	118.867
825	Irvine et al., 2014	Balaenoptera musculus	Northeast Pacific	1999CA-ST15-00838	36559.6	10.8877	97.4565	118.654
826	Irvine et al., 2014	Balaenoptera musculus	Northeast Pacific	1999CA-ST15-00838	36560.1	10.8875	97.1177	118.313
827	Irvine et al., 2014	Balaenoptera musculus	Northeast Pacific	1999CA-ST15-00838	36561.1	10.7776	96.9291	117.9
828	Irvine et al., 2014	Balaenoptera musculus	Northeast Pacific	1999CA-ST15-00838	36562.1	10.7743	96.5809	117.544
829	Irvine et al., 2014	Balaenoptera musculus	Northeast Pacific	1999CA-ST15-00838	36563.6	10.9507	96.1311	117.44
830	Irvine et al., 2014	Balaenoptera musculus	Northeast Pacific	1999CA-ST15-00838	36564.1	10.5772	96.0065	116.579
831	Irvine et al., 2014	Balaenoptera musculus	Northeast Pacific	1999CA-ST15-00838	36565.6	10.7266	95.6012	116.463
832	Irvine et al., 2014	Balaenoptera musculus	Northeast Pacific	1999CA-ST15-00838	36566.1	10.758	95.1564	116.084
833	Irvine et al., 2014	Balaenoptera musculus	Northeast Pacific	1999CA-ST15-00838	36567.6	10.7657	94.8464	115.782
834	Irvine et al., 2014	Balaenoptera musculus	Northeast Pacific	1999CA-ST15-00838	36568.6	10.7474	94.4465	115.35
835	Irvine et al., 2014	Balaenoptera musculus	Northeast Pacific	1999CA-ST15-00838	36569.1	10.7224	94.1173	114.968
836	Irvine et al., 2014	Balaenoptera musculus	Northeast Pacific	1999CA-ST15-00838	36570.1	10.8728	93.5682	114.721
837	Irvine et al., 2014	Balaenoptera musculus	Northeast Pacific	1999CA-ST15-00838	36571.1	10.922	93.0701	114.328
838	Irvine et al., 2014	Balaenoptera musculus	Northeast Pacific	1999CA-ST15-00838	36572.6	10.6236	93.0059	113.664
839	Irvine et al., 2014	Balaenoptera musculus	Northeast Pacific	1999CA-ST15-00838	36573.1	10.6822	92.5673	113.342
840	Irvine et al., 2014	Balaenoptera musculus	Northeast Pacific	1999CA-ST15-00838	36574.1	10.697	92.1561	112.961
841	Irvine et al., 2014	Balaenoptera musculus	Northeast Pacific	1999CA-ST15-00838	36575.5	10.6804	91.7494	112.525
842	Irvine et al., 2014	Balaenoptera musculus	Northeast Pacific	1999CA-ST15-00838	36577.4	10.2593	91.3401	111.279
843	Irvine et al., 2014	Balaenoptera musculus	Northeast Pacific	1999CA-ST15-00838	36578.4	10.2207	90.9983	110.858
844	Irvine et al., 2014	Balaenoptera musculus	Northeast Pacific	1999CA-ST15-00838	36579.1	10.2711	90.5473	110.508
845	Irvine et al., 2014	Balaenoptera musculus	Northeast Pacific	1999CA-ST15-00838	36580.6	10.0321	90.3165	109.811
846	Irvine et al., 2014	Balaenoptera musculus	Northeast Pacific	1999CA-ST15-00838	36581.6	9.97153	89.9639	109.34
847	Irvine et al., 2014	Balaenoptera musculus	Northeast Pacific	1999CA-ST15-00838	36582.6	10.0833	89.4748	109.072
848	Irvine et al., 2014	Balaenoptera musculus	Northeast Pacific	1999CA-ST15-00838	36583.6	10.0302	89.1127	108.607
849	Irvine et al., 2014	Balaenoptera musculus	Northeast Pacific	1999CA-ST15-00838	36584.6	9.92942	88.8436	108.131
850	Irvine et al., 2014	Balaenoptera musculus	Northeast Pacific	1999CA-ST15-00838	36585.5	9.99394	88.3612	107.781
851	Irvine et al., 2014	Balaenoptera musculus	Northeast Pacific	1999CA-ST15-00838	36586.4	9.77185	88.1709	107.149
852	Irvine et al., 2014	Balaenoptera musculus	Northeast Pacific	1999CA-ST15-00838	36587.1	9.6119	87.9356	106.593
853	Irvine et al., 2014	Balaenoptera musculus	Northeast Pacific	1999CA-ST15-00838	36588.1	9.82415	87.3106	106.395
854	Irvine et al., 2014	Balaenoptera musculus	Northeast Pacific	1999CA-ST15-00838	36589.1	9.63245	87.0933	105.797
855	Irvine et al., 2014	Balaenoptera musculus	Northeast Pacific	1999CA-ST15-00838	36590.5	9.90619	86.4473	105.691
856	Irvine et al., 2014	Balaenoptera musculus	Northeast Pacific	1999CA-ST15-00838	36592.5	9.73594	85.8006	104.707
857	Irvine et al., 2014	Balaenoptera musculus	Northeast Pacific	1999CA-ST15-00838	36593.6	9.59755	85.499	104.142
858	Irvine et al., 2014	Balaenoptera musculus	Northeast Pacific	1999CA-ST15-00838	36594.5	9.60898	85.0594	103.736
859	Irvine et al., 2014	Balaenoptera musculus	Northeast Pacific	1999CA-ST15-00838	36598.6	10.5956	82.5241	103.145
860	Irvine et al., 2014	Balaenoptera musculus	Northeast Pacific	1999CA-ST15-00838	36601.6	11.249	80.6782	102.58
861	Irvine et al., 2014	Balaenoptera musculus	Northeast Pacific	1999CA-ST15-00838	36603.6	11.8033	79.3038	102.298
862	Irvine et al., 2014	Balaenoptera musculus	Northeast Pacific	1999CA-ST15-00838	36604.6	11.6174	79.0729	101.7
863	Irvine et al., 2014	Balaenoptera musculus	Northeast Pacific	1999CA-ST15-00838	36605.1	11.1354	79.1435	100.818
864	Irvine et al., 2014	Balaenoptera musculus	Northeast Pacific	1999CA-ST15-00838	36606.1	11.1043	78.7645	100.379
865	Irvine et al., 2014	Balaenoptera musculus	Northeast Pacific	1999CA-ST15-00838	36607.6	10.9651	78.4939	99.8301
866	Irvine et al., 2014	Balaenoptera musculus	Northeast Pacific	1999CA-ST15-00838	36609.1	11.1177	77.5198	99.1598
867	Irvine et al., 2014	Balaenoptera musculus	Northeast Pacific	1999CA-ST15-00838	36610.1	10.9042	77.3337	98.5529
868	Irvine et al., 2014	Balaenoptera musculus	Northeast Pacific	1999CA-ST15-00838	36611.6	10.9691	76.8714	98.2254
869	Irvine et al., 2014	Balaenoptera musculus	Northeast Pacific	1999CA-ST15-00838	36613.6	11.2492	75.7513	97.6534
870	Irvine et al., 2014	Balaenoptera musculus	Northeast Pacific	1999CA-ST15-00838	36615.1	11.1804	75.0048	96.7687
871	Irvine et al., 2014	Balaenoptera musculus	Northeast Pacific	1999CA-ST15-00838	36616.7	11.2146	74.5543	96.3836
872	Irvine et al., 2014	Balaenoptera musculus	Northeast Pacific	1999CA-ST15-00838	36617.5	10.9893	74.4032	95.7899
873	Irvine et al., 2014	Balaenoptera musculus	Northeast Pacific	1999CA-ST15-00838	36618.6	11.2027	73.7793	95.5907
874	Irvine et al., 2014	Balaenoptera musculus	Northeast Pacific	1999CA-ST15-00838	36619.1	11.2736	73.2986	95.2502
875	Irvine et al., 2014	Balaenoptera musculus	Northeast Pacific	1999CA-ST15-00838	36620.1	11.1377	73.0483	94.7315
876	Irvine et al., 2014	Balaenoptera musculus	Northeast Pacific	1999CA-ST15-00838	36621.7	11.1963	72.5874	94.3873
877	Irvine et al., 2014	Balaenoptera musculus	Northeast Pacific	1999CA-ST15-00838	36624.6	11.1917	71.3955	93.1855
878	Irvine et al., 2014	Balaenoptera musculus	Northeast Pacific	1999CA-ST15-00838	36625.5	11.1863	71.0076	92.7872
879	Irvine et al., 2014	Balaenoptera musculus	Northeast Pacific	1999CA-ST15-00838	36627.1	11.2118	70.173	92.0001
880	Irvine et al., 2014	Balaenoptera musculus	Northeast Pacific	1999CA-ST15-00838	36628.5	11.1039	69.8901	91.5016
881	Irvine et al., 2014	Balaenoptera musculus	Northeast Pacific	1999CA-ST15-00838	36629.6	11.2002	69.3993	91.2031
882	Irvine et al., 2014	Balaenoptera musculus	Northeast Pacific	1999CA-ST15-00838	36630.4	10.9397	69.3074	90.5953
883	Irvine et al., 2014	Balaenoptera musculus	Northeast Pacific	1999CA-ST15-00838	36632.6	11.1517	68.3189	90.0301
884	Irvine et al., 2014	Balaenoptera musculus	Northeast Pacific	1999CA-ST15-00838	36635.5	11.1138	67.2458	88.8857
885	Irvine et al., 2014	Balaenoptera musculus	Northeast Pacific	1999CA-ST15-00838	36636.1	10.9918	67.0385	88.4403
886	Irvine et al., 2014	Balaenoptera musculus	Northeast Pacific	1999CA-ST15-00838	36637.1	10.977	66.7165	88.0934
887	Irvine et al., 2014	Balaenoptera musculus	Northeast Pacific	1999CA-ST15-00838	36638.4	10.9785	66.3767	87.7607
888	Irvine et al., 2014	Balaenoptera musculus	Northeast Pacific	1999CA-ST15-00838	36640.6	10.6338	66.0881	86.795
889	Irvine et al., 2014	Balaenoptera musculus	Northeast Pacific	1999CA-ST15-00838	36641.6	10.5655	65.8159	86.3887
890	Irvine et al., 2014	Balaenoptera musculus	Northeast Pacific	1999CA-ST15-00838	36642.1	10.4746	65.5637	85.9567
891	Irvine et al., 2014	Balaenoptera musculus	Northeast Pacific	1999CA-ST15-00838	36646.1	10.7719	63.8008	84.7829
892	Irvine et al., 2014	Balaenoptera musculus	Northeast Pacific	1999CA-ST15-00838	36647.1	10.3568	63.99	84.155
893	Irvine et al., 2014	Balaenoptera musculus	Northeast Pacific	1999CA-ST15-00838	36648.4	10.2547	63.8053	83.7723
894	Irvine et al., 2014	Balaenoptera musculus	Northeast Pacific	1999CA-ST15-00838	36650.6	10.0049	63.373	82.8399
895	Irvine et al., 2014	Balaenoptera musculus	Northeast Pacific	1999CA-ST15-00838	36651.6	9.95619	63.0896	82.4594
896	Irvine et al., 2014	Balaenoptera musculus	Northeast Pacific	1999CA-ST15-00838	36652.7	10.0166	62.7386	82.2334
897	Irvine et al., 2014	Balaenoptera musculus	Northeast Pacific	1999CA-ST15-00838	36653.6	10.0834	62.3576	81.9875
898	Irvine et al., 2014	Balaenoptera musculus	Northeast Pacific	1999CA-ST15-00838	36654.6	10.0671	62.1639	81.773
899	Irvine et al., 2014	Balaenoptera musculus	Northeast Pacific	1999CA-ST15-00838	36656.6	9.61782	62.1144	80.8395
900	Irvine et al., 2014	Balaenoptera musculus	Northeast Pacific	1999CA-ST15-00838	36657.6	9.58287	61.8828	80.5428
901	Irvine et al., 2014	Balaenoptera musculus	Northeast Pacific	1999CA-ST15-00838	36658.6	9.38208	61.7354	79.9893
902	Irvine et al., 2014	Balaenoptera musculus	Northeast Pacific	1999CA-ST15-00838	36660.5	9.49919	61.0157	79.5039
903	Irvine et al., 2014	Balaenoptera musculus	Northeast Pacific	1999CA-ST15-00838	36661.5	9.71336	60.4385	79.3485
904	Irvine et al., 2014	Balaenoptera musculus	Northeast Pacific	1999CA-ST15-00838	36662.5	9.62412	60.1557	78.8799
905	Irvine et al., 2014	Balaenoptera musculus	Northeast Pacific	1999CA-ST15-00838	36663.9	9.54079	59.9361	78.4926
906	Irvine et al., 2014	Balaenoptera musculus	Northeast Pacific	1999CA-ST15-00845	36441.9	14.198	82.0896	110.08
907	Irvine et al., 2014	Balaenoptera musculus	Northeast Pacific	1999CA-ST15-00845	36443.9	14.1419	83.0213	110.899
908	Irvine et al., 2014	Balaenoptera musculus	Northeast Pacific	1999CA-ST15-00849	36441.8	14.1954	82.0919	110.078
909	Irvine et al., 2014	Balaenoptera musculus	Northeast Pacific	1999CA-ST15-00849	36478.9	9.50737	98.7106	117.552
910	Irvine et al., 2014	Balaenoptera musculus	Northeast Pacific	1999CA-ST15-01388	36442	14.1816	82.1043	110.063
911	Irvine et al., 2014	Balaenoptera musculus	Northeast Pacific	1999CA-ST15-01388	36703.1	11.6151	52.0423	74.8292
912	Irvine et al., 2014	Balaenoptera musculus	Northeast Pacific	1999CA-ST15-02082	36437.6	14.165	80.3569	108.285
913	Irvine et al., 2014	Balaenoptera musculus	Northeast Pacific	1999CA-ST15-02082	36438.6	14.0953	80.8591	108.649
914	Irvine et al., 2014	Balaenoptera musculus	Northeast Pacific	1999CA-ST15-02082	36439.1	14.149	81.2527	109.148
915	Irvine et al., 2014	Balaenoptera musculus	Northeast Pacific	1999CA-ST15-02082	36440.1	14.1118	81.7274	109.548
916	Irvine et al., 2014	Balaenoptera musculus	Northeast Pacific	1999CA-ST15-02082	36441.1	14.3037	81.9943	110.194
917	Irvine et al., 2014	Balaenoptera musculus	Northeast Pacific	1999CA-ST15-02082	36442.1	14.1834	82.5432	110.504
918	Irvine et al., 2014	Balaenoptera musculus	Northeast Pacific	1999CA-ST15-02082	36443.6	14.2133	83.0255	111.032
919	Irvine et al., 2014	Balaenoptera musculus	Northeast Pacific	1999CA-ST15-02082	36444.1	14.2702	83.3462	111.477
920	Irvine et al., 2014	Balaenoptera musculus	Northeast Pacific	1999CA-ST15-02082	36445.1	14.6536	83.4942	112.376
921	Irvine et al., 2014	Balaenoptera musculus	Northeast Pacific	1999CA-ST15-02082	36446.1	14.1021	84.3688	112.164
922	Irvine et al., 2014	Balaenoptera musculus	Northeast Pacific	1999CA-ST15-02082	36447.6	14.333	84.608	112.859
923	Irvine et al., 2014	Balaenoptera musculus	Northeast Pacific	1999CA-ST15-02082	36448.1	14.1059	85.2355	113.036
924	Irvine et al., 2014	Balaenoptera musculus	Northeast Pacific	1999CA-ST15-02082	36449.1	14.0299	85.7515	113.397
925	Irvine et al., 2014	Balaenoptera musculus	Northeast Pacific	1999CA-ST15-02082	36450.1	14.2256	86.0092	114.043
926	Irvine et al., 2014	Balaenoptera musculus	Northeast Pacific	1999CA-ST15-02082	36451.1	14.1345	86.5071	114.36
927	Irvine et al., 2014	Balaenoptera musculus	Northeast Pacific	1999CA-ST15-02082	36452.5	14.1646	86.9257	114.835
928	Irvine et al., 2014	Balaenoptera musculus	Northeast Pacific	1999CA-ST15-02082	36453.1	14.1799	87.3364	115.275
929	Irvine et al., 2014	Balaenoptera musculus	Northeast Pacific	1999CA-ST15-02082	36454.1	14.1525	87.7848	115.668
930	Irvine et al., 2014	Balaenoptera musculus	Northeast Pacific	1999CA-ST15-02082	36455.1	14.2796	88.0913	116.226
931	Irvine et al., 2014	Balaenoptera musculus	Northeast Pacific	1999CA-ST15-02082	36456.6	14.2822	88.5298	116.666
932	Irvine et al., 2014	Balaenoptera musculus	Northeast Pacific	1999CA-ST15-02082	36458.1	14.2344	89.3872	117.427
933	Irvine et al., 2014	Balaenoptera musculus	Northeast Pacific	1999CA-ST15-02082	36459.1	14.3663	89.7534	118.048
934	Irvine et al., 2014	Balaenoptera musculus	Northeast Pacific	1999CA-ST15-02082	36460.5	14.3499	90.2321	118.488
935	Irvine et al., 2014	Balaenoptera musculus	Northeast Pacific	1999CA-ST15-02082	36461.9	14.3777	90.5779	118.891
936	Irvine et al., 2014	Balaenoptera musculus	Northeast Pacific	1999CA-ST15-02082	36462.5	13.9375	91.2555	118.701
937	Irvine et al., 2014	Balaenoptera musculus	Northeast Pacific	1999CA-ST15-02082	36463.1	13.8834	91.646	118.987
938	Irvine et al., 2014	Balaenoptera musculus	Northeast Pacific	1999CA-ST15-02082	36464.1	13.45	92.2949	118.783
939	Irvine et al., 2014	Balaenoptera musculus	Northeast Pacific	1999CA-ST15-02082	36465.6	12.5142	93.5224	118.146
940	Irvine et al., 2014	Balaenoptera musculus	Northeast Pacific	1999CA-ST15-02082	36466.6	12.822	93.4381	118.69
941	Irvine et al., 2014	Balaenoptera musculus	Northeast Pacific	1999CA-ST15-02082	36467.1	12.6649	93.9073	118.848
942	Irvine et al., 2014	Balaenoptera musculus	Northeast Pacific	1999CA-ST15-04172	36441.8	14.1935	82.0936	110.075
943	Irvine et al., 2014	Balaenoptera musculus	Northeast Pacific	1999CA-ST15-04172	36442.1	14.1946	82.5329	110.516
944	Irvine et al., 2014	Balaenoptera musculus	Northeast Pacific	1999CA-ST15-04172	36443.5	14.1586	83.0039	110.915
945	Irvine et al., 2014	Balaenoptera musculus	Northeast Pacific	1999CA-ST15-04172	36444.1	14.2851	83.3321	111.492
946	Irvine et al., 2014	Balaenoptera musculus	Northeast Pacific	1999CA-ST15-04172	36445.1	14.2192	83.8289	111.857
947	Irvine et al., 2014	Balaenoptera musculus	Northeast Pacific	1999CA-ST15-04172	36446.1	14.1031	84.3701	112.167
948	Irvine et al., 2014	Balaenoptera musculus	Northeast Pacific	1999CA-ST15-04172	36447.6	14.1403	84.7729	112.642
949	Irvine et al., 2014	Balaenoptera musculus	Northeast Pacific	1999CA-ST15-04172	36448.1	14.2198	85.1359	113.162
950	Irvine et al., 2014	Balaenoptera musculus	Northeast Pacific	1999CA-ST15-04172	36449.1	14.0118	85.7489	113.361
951	Irvine et al., 2014	Balaenoptera musculus	Northeast Pacific	1999CA-ST15-04172	36450.1	14.2784	85.951	114.091
952	Irvine et al., 2014	Balaenoptera musculus	Northeast Pacific	1999CA-ST15-04172	36451.1	14.2193	86.4316	114.453
953	Irvine et al., 2014	Balaenoptera musculus	Northeast Pacific	1999CA-ST15-04172	36452.6	14.133	86.9852	114.828
954	Irvine et al., 2014	Balaenoptera musculus	Northeast Pacific	1999CA-ST15-04172	36453.1	14.1567	87.3463	115.24
955	Irvine et al., 2014	Balaenoptera musculus	Northeast Pacific	1999CA-ST15-04172	36454.1	14.1868	87.7427	115.695
956	Irvine et al., 2014	Balaenoptera musculus	Northeast Pacific	1999CA-ST15-04172	36456.6	13.902	88.7509	116.143
957	Irvine et al., 2014	Balaenoptera musculus	Northeast Pacific	1999CA-ST15-04172	36457.1	14.3595	89.0095	117.286
958	Irvine et al., 2014	Balaenoptera musculus	Northeast Pacific	1999CA-ST15-04172	36458.1	14.2579	89.4048	117.488
959	Irvine et al., 2014	Balaenoptera musculus	Northeast Pacific	1999CA-ST15-04172	36459.5	13.8938	89.962	117.336
960	Irvine et al., 2014	Balaenoptera musculus	Northeast Pacific	1999CA-ST15-04172	36460.6	13.798	90.4784	117.658
961	Irvine et al., 2014	Balaenoptera musculus	Northeast Pacific	1999CA-ST15-04172	36461.5	13.8947	90.868	118.232
962	Irvine et al., 2014	Balaenoptera musculus	Northeast Pacific	1999CA-ST15-04172	36462.1	13.6263	91.5896	118.411
963	Irvine et al., 2014	Balaenoptera musculus	Northeast Pacific	1999CA-ST15-04172	36463.1	13.5951	91.8876	118.657
964	Irvine et al., 2014	Balaenoptera musculus	Northeast Pacific	1999CA-ST15-04172	36464.1	14.0638	91.869	119.569
965	Irvine et al., 2014	Balaenoptera musculus	Northeast Pacific	1999CA-ST15-04172	36465.9	13.8109	92.4469	119.645
966	Irvine et al., 2014	Balaenoptera musculus	Northeast Pacific	1999CA-ST15-04172	36466.1	13.5527	93.2141	119.884
967	Irvine et al., 2014	Balaenoptera musculus	Northeast Pacific	1999CA-ST15-04172	36467.1	13.1603	93.957	119.843
968	Irvine et al., 2014	Balaenoptera musculus	Northeast Pacific	1999CA-ST15-04172	36468.1	14.2039	93.4463	121.407
969	Irvine et al., 2014	Balaenoptera musculus	Northeast Pacific	1999CA-ST15-04172	36469.1	14.0284	93.8602	121.478
970	Irvine et al., 2014	Balaenoptera musculus	Northeast Pacific	1999CA-ST15-04172	36470.6	13.6252	94.6982	121.504
971	Irvine et al., 2014	Balaenoptera musculus	Northeast Pacific	1999CA-ST15-04172	36471.6	13.6694	94.9259	121.825
972	Irvine et al., 2014	Balaenoptera musculus	Northeast Pacific	1999CA-ST15-04172	36472.1	13.1665	95.6363	121.539
973	Irvine et al., 2014	Balaenoptera musculus	Northeast Pacific	1999CA-ST15-04172	36473.1	13.179	95.9245	121.854
974	Irvine et al., 2014	Balaenoptera musculus	Northeast Pacific	1999CA-ST15-04172	36474.4	13.1542	95.9626	121.866
975	Irvine et al., 2014	Balaenoptera musculus	Northeast Pacific	1999CA-ST15-04172	36475.1	12.9893	96.3838	121.962
976	Irvine et al., 2014	Balaenoptera musculus	Northeast Pacific	1999CA-ST15-04172	36477.1	11.4803	98.1979	120.783
977	Irvine et al., 2014	Balaenoptera musculus	Northeast Pacific	1999CA-ST15-04172	36478.1	11.8681	97.9943	121.365
978	Irvine et al., 2014	Balaenoptera musculus	Northeast Pacific	1999CA-ST15-04172	36479.5	11.5877	98.3649	121.192
979	Irvine et al., 2014	Balaenoptera musculus	Northeast Pacific	1999CA-ST15-04172	36480.1	11.3209	98.7944	121.099
980	Irvine et al., 2014	Balaenoptera musculus	Northeast Pacific	1999CA-ST15-04172	36481.1	11.0345	99.1854	120.933
981	Irvine et al., 2014	Balaenoptera musculus	Northeast Pacific	1999CA-ST15-04172	36483.4	11.0162	99.7496	121.459
982	Irvine et al., 2014	Balaenoptera musculus	Northeast Pacific	1999CA-ST15-04172	36484.1	10.6361	100.171	121.141
983	Irvine et al., 2014	Balaenoptera musculus	Northeast Pacific	1999CA-ST15-04172	36485.1	10.432	100.488	121.063
984	Irvine et al., 2014	Balaenoptera musculus	Northeast Pacific	1999CA-ST15-04172	36486.6	9.52352	101.245	120.049
985	Irvine et al., 2014	Balaenoptera musculus	Northeast Pacific	1999CA-ST15-04172	36488.5	9.4706	101.853	120.538
986	Irvine et al., 2014	Balaenoptera musculus	Northeast Pacific	1999CA-ST15-04172	36489.5	9.56641	101.949	120.83
987	Irvine et al., 2014	Balaenoptera musculus	Northeast Pacific	1999CA-ST15-04172	36490.6	8.99	102.539	120.291
988	Irvine et al., 2014	Balaenoptera musculus	Northeast Pacific	1999CA-ST15-04172	36491.6	9.18902	102.644	120.781
989	Irvine et al., 2014	Balaenoptera musculus	Northeast Pacific	1999CA-ST15-04172	36492.6	8.96465	102.999	120.696
990	Irvine et al., 2014	Balaenoptera musculus	Northeast Pacific	1999CA-ST15-04172	36493.4	8.80614	103.258	120.65
991	Irvine et al., 2014	Balaenoptera musculus	Northeast Pacific	1999CA-ST15-04172	36494.4	8.41997	103.738	120.369
992	Irvine et al., 2014	Balaenoptera musculus	Northeast Pacific	1999CA-ST15-04172	36495.5	8.55028	103.749	120.645
993	Irvine et al., 2014	Balaenoptera musculus	Northeast Pacific	1999CA-ST15-04172	36496.6	7.9258	104.534	120.182
994	Irvine et al., 2014	Balaenoptera musculus	Northeast Pacific	1999CA-ST15-04172	36497.5	7.9511	104.611	120.318
995	Irvine et al., 2014	Balaenoptera musculus	Northeast Pacific	1999CA-ST15-04172	36498.1	8.11157	104.456	120.508
996	Irvine et al., 2014	Balaenoptera musculus	Northeast Pacific	1999CA-ST15-04172	36499.1	7.65869	105.315	120.418
997	Irvine et al., 2014	Balaenoptera musculus	Northeast Pacific	1999CA-ST15-04172	36501.4	7.29859	105.697	120.118
998	Irvine et al., 2014	Balaenoptera musculus	Northeast Pacific	1999CA-ST15-04172	36502.4	7.05019	106.121	120.035
999	Irvine et al., 2014	Balaenoptera musculus	Northeast Pacific	1999CA-ST15-04172	36503.6	6.71087	106.564	119.799
1000	Irvine et al., 2014	Balaenoptera musculus	Northeast Pacific	1999CA-ST15-04172	36504.5	6.80602	106.569	119.995
1001	Irvine et al., 2014	Balaenoptera musculus	Northeast Pacific	1999CA-ST15-04172	36505.6	6.72526	106.623	119.91
1002	Irvine et al., 2014	Balaenoptera musculus	Northeast Pacific	1999CA-ST15-04172	36507.6	6.58622	106.853	119.876
1003	Irvine et al., 2014	Balaenoptera musculus	Northeast Pacific	1999CA-ST15-04172	36508.1	6.45366	107.097	119.845
1004	Irvine et al., 2014	Balaenoptera musculus	Northeast Pacific	1999CA-ST15-04172	36512.6	5.9218	107.77	119.463
1005	Irvine et al., 2014	Balaenoptera musculus	Northeast Pacific	1999CA-ST15-04172	36513.9	6.13183	107.459	119.607
1006	Irvine et al., 2014	Balaenoptera musculus	Northeast Pacific	1999CA-ST15-04172	36515.5	6.20967	107.55	119.811
1007	Irvine et al., 2014	Balaenoptera musculus	Northeast Pacific	1999CA-ST15-04172	36516.6	6.00131	107.795	119.629
1008	Irvine et al., 2014	Balaenoptera musculus	Northeast Pacific	1999CA-ST15-04172	36518.9	4.80885	109.06	118.313
1009	Irvine et al., 2014	Balaenoptera musculus	Northeast Pacific	1999CA-ST15-04172	36521.1	5.20948	108.485	118.718
1010	Irvine et al., 2014	Balaenoptera musculus	Northeast Pacific	1999CA-ST15-04172	36522.9	5.57308	108.255	119.172
1011	Irvine et al., 2014	Balaenoptera musculus	Northeast Pacific	1999CA-ST15-04172	36524.1	5.09681	108.427	118.425
1012	Irvine et al., 2014	Balaenoptera musculus	Northeast Pacific	1999CA-ST15-04172	36525.4	5.57362	107.835	118.793
1013	Irvine et al., 2014	Balaenoptera musculus	Northeast Pacific	1999CA-ST15-04172	36526.1	5.33978	108.012	118.492
1014	Irvine et al., 2014	Balaenoptera musculus	Northeast Pacific	1999CA-ST15-04172	36528.6	5.45073	107.668	118.373
1015	Irvine et al., 2014	Balaenoptera musculus	Northeast Pacific	1999CA-ST15-04172	36529.1	5.51871	107.486	118.325
1016	Irvine et al., 2014	Balaenoptera musculus	Northeast Pacific	1999CA-ST15-04172	36530.6	5.26086	107.586	117.918
1017	Irvine et al., 2014	Balaenoptera musculus	Northeast Pacific	1999CA-ST15-04172	36534.1	5.44481	106.883	117.558
1018	Irvine et al., 2014	Balaenoptera musculus	Northeast Pacific	1999CA-ST15-04172	36535.4	5.43729	106.733	117.389
1019	Irvine et al., 2014	Balaenoptera musculus	Northeast Pacific	1999CA-ST15-04173	36436.1	13.8624	80.1879	107.521
1020	Irvine et al., 2014	Balaenoptera musculus	Northeast Pacific	1999CA-ST15-04173	36439.1	13.9323	81.4446	108.913
1021	Irvine et al., 2014	Balaenoptera musculus	Northeast Pacific	1999CA-ST15-04173	36440.1	13.7478	82.0431	109.147
1022	Irvine et al., 2014	Balaenoptera musculus	Northeast Pacific	1999CA-ST15-04173	36442.1	14.1885	82.5384	110.509
1023	Irvine et al., 2014	Balaenoptera musculus	Northeast Pacific	1999CA-ST15-04173	36461.5	11.1896	92.3638	114.45
1024	Irvine et al., 2014	Balaenoptera musculus	Northeast Pacific	1999CA-ST15-04173	36466.6	10.5643	94.5524	115.414
1025	Irvine et al., 2014	Balaenoptera musculus	Northeast Pacific	1999CA-ST15-04173	36471.6	10.3497	96.4382	116.868
1026	Irvine et al., 2014	Balaenoptera musculus	Northeast Pacific	1999CA-ST15-04173	36497.5	10.3258	103.523	123.829
1027	Irvine et al., 2014	Balaenoptera musculus	Northeast Pacific	1999CA-ST15-04173	36505.6	10.2905	104.771	124.977
1028	Irvine et al., 2014	Balaenoptera musculus	Northeast Pacific	1999CA-ST15-04173	36511.1	10.3182	105.234	125.474
1029	Irvine et al., 2014	Balaenoptera musculus	Northeast Pacific	1999CA-ST15-04173	36524.1	10.2671	105.113	125.209
1030	Irvine et al., 2014	Balaenoptera musculus	Northeast Pacific	1999CA-ST15-04173	36525.1	10.2875	104.993	125.128
1031	Irvine et al., 2014	Balaenoptera musculus	Northeast Pacific	1999CA-ST15-04173	36531.5	10.2445	104.567	124.579
1032	Irvine et al., 2014	Balaenoptera musculus	Northeast Pacific	1999CA-ST15-04173	36547.1	10.8047	100.749	121.836
1033	Irvine et al., 2014	Balaenoptera musculus	Northeast Pacific	1999CA-ST15-04173	36551.1	10.7721	99.6691	120.683
1034	Irvine et al., 2014	Balaenoptera musculus	Northeast Pacific	1999CA-ST15-04173	36552.4	10.4796	99.5795	120.014
1035	Irvine et al., 2014	Balaenoptera musculus	Northeast Pacific	1999CA-ST15-04173	36556.1	10.5018	98.3437	118.815
1036	Irvine et al., 2014	Balaenoptera musculus	Northeast Pacific	1999CA-ST15-04173	36557.1	10.4464	98.0979	118.456
1037	Irvine et al., 2014	Balaenoptera musculus	Northeast Pacific	1999CA-ST15-04173	36558.1	10.3003	97.9552	118.016
1038	Irvine et al., 2014	Balaenoptera musculus	Northeast Pacific	1999CA-ST15-04173	36560.1	10.2183	97.3318	117.23
1039	Irvine et al., 2014	Balaenoptera musculus	Northeast Pacific	1999CA-ST15-04173	36561.1	10.217	97.0039	116.898
1040	Irvine et al., 2014	Balaenoptera musculus	Northeast Pacific	1999CA-ST15-04173	36562.1	10.2868	96.5912	116.624
1041	Irvine et al., 2014	Balaenoptera musculus	Northeast Pacific	1999CA-ST15-04173	36565.6	10.2767	95.5222	115.536
1042	Irvine et al., 2014	Balaenoptera musculus	Northeast Pacific	1999CA-ST15-04173	36566.1	10.2194	95.2518	115.147
1043	Irvine et al., 2014	Balaenoptera musculus	Northeast Pacific	1999CA-ST15-04173	36567.5	10.2723	94.8274	114.829
1044	Irvine et al., 2014	Balaenoptera musculus	Northeast Pacific	1999CA-ST15-04176	36436.7	14.1834	79.8974	107.862
1045	Irvine et al., 2014	Balaenoptera musculus	Northeast Pacific	1999CA-ST15-04176	36437.6	14.2427	80.2835	108.366
1046	Irvine et al., 2014	Balaenoptera musculus	Northeast Pacific	1999CA-ST15-04176	36438.6	14.2156	80.7488	108.777
1047	Irvine et al., 2014	Balaenoptera musculus	Northeast Pacific	1999CA-ST15-04176	36442.1	14.2308	82.5286	110.578
1048	Irvine et al., 2014	Balaenoptera musculus	Northeast Pacific	1999CA-ST15-04176	36443.6	14.266	82.9695	111.082
1049	Irvine et al., 2014	Balaenoptera musculus	Northeast Pacific	1999CA-ST15-04176	36444.6	14.2096	83.4776	111.475
1050	Irvine et al., 2014	Balaenoptera musculus	Northeast Pacific	1999CA-ST15-04176	36445.6	14.3472	83.748	112.025
1051	Irvine et al., 2014	Balaenoptera musculus	Northeast Pacific	1999CA-ST15-04176	36446.6	14.2695	84.2726	112.392
1052	Irvine et al., 2014	Balaenoptera musculus	Northeast Pacific	1999CA-ST15-04176	36447.6	14.2327	84.7651	112.807
1053	Irvine et al., 2014	Balaenoptera musculus	Northeast Pacific	1999CA-ST15-04176	36448.1	14.2303	85.1399	113.185
1054	Irvine et al., 2014	Balaenoptera musculus	Northeast Pacific	1999CA-ST15-04176	36449.1	14.3031	85.5572	113.739
1055	Irvine et al., 2014	Balaenoptera musculus	Northeast Pacific	1999CA-ST15-04176	36450.5	14.0219	86.1623	113.795
1056	Irvine et al., 2014	Balaenoptera musculus	Northeast Pacific	1999CA-ST15-04176	36451.6	13.4065	87.0548	113.474
1057	Irvine et al., 2014	Balaenoptera musculus	Northeast Pacific	1999CA-ST15-04176	36452.6	12.764	87.9924	113.141
1058	Irvine et al., 2014	Balaenoptera musculus	Northeast Pacific	1999CA-ST15-04176	36453.5	12.5806	88.4394	113.24
1059	Irvine et al., 2014	Balaenoptera musculus	Northeast Pacific	1999CA-ST15-04176	36458.1	12.0742	90.6527	114.471
1060	Irvine et al., 2014	Balaenoptera musculus	Northeast Pacific	1999CA-ST15-04176	36459.1	11.7234	91.2405	114.375
1061	Irvine et al., 2014	Balaenoptera musculus	Northeast Pacific	1999CA-ST15-04176	36461.6	11.5348	92.0427	114.816
1062	Irvine et al., 2014	Balaenoptera musculus	Northeast Pacific	1999CA-ST15-04176	36463.4	10.6378	93.3419	114.365
1063	Irvine et al., 2014	Balaenoptera musculus	Northeast Pacific	1999CA-ST15-04176	36466.6	10.2145	94.6266	114.828
1064	Irvine et al., 2014	Balaenoptera musculus	Northeast Pacific	1999CA-ST15-04176	36468.6	9.89112	95.6106	115.166
1065	Irvine et al., 2014	Balaenoptera musculus	Northeast Pacific	1999CA-ST15-04176	36471.6	9.6399	96.9619	115.996
1066	Irvine et al., 2014	Balaenoptera musculus	Northeast Pacific	1999CA-ST15-04176	36473.4	9.39084	97.8467	116.381
1067	Irvine et al., 2014	Balaenoptera musculus	Northeast Pacific	1999CA-ST15-04176	36474.4	9.09021	98.5112	116.437
1068	Irvine et al., 2014	Balaenoptera musculus	Northeast Pacific	1999CA-ST15-04176	36477.5	9.31052	99.3931	117.734
1069	Irvine et al., 2014	Balaenoptera musculus	Northeast Pacific	1999CA-ST15-04176	36478.6	9.66815	99.3375	118.392
1070	Irvine et al., 2014	Balaenoptera musculus	Northeast Pacific	1999CA-ST15-04176	36479.6	9.6742	99.6382	118.702
1071	Irvine et al., 2014	Balaenoptera musculus	Northeast Pacific	1999CA-ST15-04176	36480.4	9.54919	100.051	118.864
1072	Irvine et al., 2014	Balaenoptera musculus	Northeast Pacific	1999CA-ST15-04176	36481.6	9.58028	100.284	119.16
1073	Irvine et al., 2014	Balaenoptera musculus	Northeast Pacific	1999CA-ST15-04176	36482.4	9.66781	100.469	119.519
1074	Irvine et al., 2014	Balaenoptera musculus	Northeast Pacific	1999CA-ST15-04176	36483.6	9.61491	100.783	119.727
1075	Irvine et al., 2014	Balaenoptera musculus	Northeast Pacific	1999CA-ST15-04176	36485.6	9.82902	101.021	120.398
1076	Irvine et al., 2014	Balaenoptera musculus	Northeast Pacific	1999CA-ST15-04176	36487.6	9.77176	101.506	120.774
1077	Irvine et al., 2014	Balaenoptera musculus	Northeast Pacific	1999CA-ST15-04176	36488.6	9.96385	101.611	121.254
1078	Irvine et al., 2014	Balaenoptera musculus	Northeast Pacific	1999CA-ST15-04176	36490.4	9.77813	102.139	121.42
1079	Irvine et al., 2014	Balaenoptera musculus	Northeast Pacific	1999CA-ST15-04176	36492.6	9.83783	102.542	121.935
1080	Irvine et al., 2014	Balaenoptera musculus	Northeast Pacific	1999CA-ST15-04176	36497.9	9.52485	104.092	122.818
1081	Irvine et al., 2014	Balaenoptera musculus	Northeast Pacific	1999CA-ST15-04176	36499.4	9.59842	104.453	123.31
1082	Irvine et al., 2014	Balaenoptera musculus	Northeast Pacific	1999CA-ST15-04176	36500.6	9.60045	104.581	123.442
1083	Irvine et al., 2014	Balaenoptera musculus	Northeast Pacific	1999CA-ST15-04176	36501.6	9.61579	104.826	123.705
1084	Irvine et al., 2014	Balaenoptera musculus	Northeast Pacific	1999CA-ST15-04176	36502.6	9.59067	105.15	123.961
1085	Irvine et al., 2014	Balaenoptera musculus	Northeast Pacific	1999CA-ST15-04176	36503.5	9.80646	105.163	124.394
1086	Irvine et al., 2014	Balaenoptera musculus	Northeast Pacific	1999CA-ST15-04176	36505.6	10.0289	105.255	124.918
1087	Irvine et al., 2014	Balaenoptera musculus	Northeast Pacific	1999CA-ST15-04176	36506.6	10.0677	105.423	125.153
1088	Irvine et al., 2014	Balaenoptera musculus	Northeast Pacific	1999CA-ST15-04176	36510.6	10.0701	105.784	125.503
1089	Irvine et al., 2014	Balaenoptera musculus	Northeast Pacific	1999CA-ST15-04176	36511.6	10.5931	105.569	126.313
1090	Irvine et al., 2014	Balaenoptera musculus	Northeast Pacific	1999CA-ST15-04176	36513.6	10.9306	105.627	127.018
1091	Irvine et al., 2014	Balaenoptera musculus	Northeast Pacific	1999CA-ST15-04176	36514.6	11.0059	105.702	127.233
1092	Irvine et al., 2014	Balaenoptera musculus	Northeast Pacific	1999CA-ST15-04176	36515.5	10.9105	105.778	127.117
1093	Irvine et al., 2014	Balaenoptera musculus	Northeast Pacific	1999CA-ST15-04176	36516.1	11.1002	105.701	127.41
1094	Irvine et al., 2014	Balaenoptera musculus	Northeast Pacific	1999CA-ST15-04176	36517.6	11.0984	105.705	127.407
1095	Irvine et al., 2014	Balaenoptera musculus	Northeast Pacific	1999CA-ST15-04176	36519.6	11.1927	105.599	127.482
1096	Irvine et al., 2014	Balaenoptera musculus	Northeast Pacific	1999CA-ST15-04176	36521.1	11.19	105.578	127.446
1097	Irvine et al., 2014	Balaenoptera musculus	Northeast Pacific	1999CA-ST15-04176	36522.1	11.2821	105.51	127.555
1098	Irvine et al., 2014	Balaenoptera musculus	Northeast Pacific	1999CA-ST15-04176	36523.9	11.2449	105.488	127.455
1099	Irvine et al., 2014	Balaenoptera musculus	Northeast Pacific	1999CA-ST15-04176	36524.1	11.2744	105.393	127.415
1100	Irvine et al., 2014	Balaenoptera musculus	Northeast Pacific	1999CA-ST15-04176	36525.1	11.2272	105.337	127.262
1101	Irvine et al., 2014	Balaenoptera musculus	Northeast Pacific	1999CA-ST15-04176	36527.6	11.2288	105.126	127.05
1102	Irvine et al., 2014	Balaenoptera musculus	Northeast Pacific	1999CA-ST15-04176	36528.6	11.3069	104.92	126.998
1103	Irvine et al., 2014	Balaenoptera musculus	Northeast Pacific	1999CA-ST15-04176	36530.1	10.9562	104.797	126.18
1104	Irvine et al., 2014	Balaenoptera musculus	Northeast Pacific	1999CA-ST15-04176	36531.5	10.9639	104.647	126.043
1105	Irvine et al., 2014	Balaenoptera musculus	Northeast Pacific	1999CA-ST15-04176	36532.6	10.9137	104.521	125.816
1106	Irvine et al., 2014	Balaenoptera musculus	Northeast Pacific	1999CA-ST15-04176	36533.5	10.8683	104.397	125.598
1107	Irvine et al., 2014	Balaenoptera musculus	Northeast Pacific	1999CA-ST15-04176	36534.1	10.8831	104.225	125.453
1108	Irvine et al., 2014	Balaenoptera musculus	Northeast Pacific	1999CA-ST15-04176	36536.4	10.9485	103.833	125.184
1109	Irvine et al., 2014	Balaenoptera musculus	Northeast Pacific	1999CA-ST15-04176	36539.1	11.2712	103.028	125.009
1110	Irvine et al., 2014	Balaenoptera musculus	Northeast Pacific	1999CA-ST15-04176	36540.1	11.2132	102.934	124.793
1111	Irvine et al., 2014	Balaenoptera musculus	Northeast Pacific	1999CA-ST15-04176	36541.6	11.0762	102.764	124.351
1112	Irvine et al., 2014	Balaenoptera musculus	Northeast Pacific	1999CA-ST15-04176	36543.6	11.3496	102.212	124.329
1113	Irvine et al., 2014	Balaenoptera musculus	Northeast Pacific	1999CA-ST15-04176	36544.6	11.538	101.936	124.418
1114	Irvine et al., 2014	Balaenoptera musculus	Northeast Pacific	1999CA-ST15-04176	36545.6	11.8449	101.521	124.607
1115	Irvine et al., 2014	Balaenoptera musculus	Northeast Pacific	1999CA-ST15-04176	36546.6	11.9588	101.136	124.447
1116	Irvine et al., 2014	Balaenoptera musculus	Northeast Pacific	1999CA-ST15-04176	36547.1	11.8133	100.987	124.007
1117	Irvine et al., 2014	Balaenoptera musculus	Northeast Pacific	1999CA-ST15-04176	36548.1	11.8636	100.669	123.787
1118	Irvine et al., 2014	Balaenoptera musculus	Northeast Pacific	1999CA-ST15-04176	36549.1	11.8089	100.418	123.425
1119	Irvine et al., 2014	Balaenoptera musculus	Northeast Pacific	1999CA-ST15-04176	36550.5	11.7856	100.132	123.091
1120	Irvine et al., 2014	Balaenoptera musculus	Northeast Pacific	1999CA-ST15-04176	36552.4	11.7723	99.5081	122.439
1121	Irvine et al., 2014	Balaenoptera musculus	Northeast Pacific	1999CA-ST15-04176	36553.6	12.0413	99.0771	122.535
1122	Irvine et al., 2014	Balaenoptera musculus	Northeast Pacific	1999CA-ST15-04176	36554.6	11.9494	98.7909	122.067
1123	Irvine et al., 2014	Balaenoptera musculus	Northeast Pacific	1999CA-ST15-04176	36555.6	11.9344	98.436	121.683
1124	Irvine et al., 2014	Balaenoptera musculus	Northeast Pacific	1999CA-ST15-04176	36556.6	11.8489	98.1364	121.215
1125	Irvine et al., 2014	Balaenoptera musculus	Northeast Pacific	1999CA-ST15-04176	36557.1	11.8484	97.8273	120.902
1126	Irvine et al., 2014	Balaenoptera musculus	Northeast Pacific	1999CA-ST15-04176	36558.6	11.8396	97.4925	120.548
1127	Irvine et al., 2014	Balaenoptera musculus	Northeast Pacific	1999CA-ST15-04176	36559.5	11.8751	97.1286	120.253
1128	Irvine et al., 2014	Balaenoptera musculus	Northeast Pacific	1999CA-ST15-04176	36560.1	11.9677	96.6792	119.988
1129	Irvine et al., 2014	Balaenoptera musculus	Northeast Pacific	1999CA-ST15-04176	36561.6	11.9299	96.3802	119.611
1130	Irvine et al., 2014	Balaenoptera musculus	Northeast Pacific	1999CA-ST15-04176	36562.1	11.9842	96.0158	119.35
1131	Irvine et al., 2014	Balaenoptera musculus	Northeast Pacific	1999CA-ST15-04176	36564.5	11.8617	95.3216	118.415
1132	Irvine et al., 2014	Balaenoptera musculus	Northeast Pacific	1999CA-ST15-04176	36565.1	11.8797	94.9253	118.054
1133	Irvine et al., 2014	Balaenoptera musculus	Northeast Pacific	1999CA-ST15-04176	36566.1	11.882	94.5638	117.695
1134	Irvine et al., 2014	Balaenoptera musculus	Northeast Pacific	1999CA-ST15-04176	36567.9	11.9391	94.1247	117.37
1135	Irvine et al., 2014	Balaenoptera musculus	Northeast Pacific	1999CA-ST15-04176	36568.6	11.9044	93.781	116.955
1136	Irvine et al., 2014	Balaenoptera musculus	Northeast Pacific	1999CA-ST15-04176	36569.6	11.8731	93.4277	116.539
1137	Irvine et al., 2014	Balaenoptera musculus	Northeast Pacific	1999CA-ST15-04176	36570.1	11.9488	92.9698	116.231
1138	Irvine et al., 2014	Balaenoptera musculus	Northeast Pacific	1999CA-ST15-04176	36571.1	11.9439	92.5925	115.842
1139	Irvine et al., 2014	Balaenoptera musculus	Northeast Pacific	1999CA-ST15-04176	36572.6	11.9587	92.135	115.418
1140	Irvine et al., 2014	Balaenoptera musculus	Northeast Pacific	1999CA-ST15-04176	36573.5	11.9609	91.7722	115.056
1141	Irvine et al., 2014	Balaenoptera musculus	Northeast Pacific	1999CA-ST15-04176	36574.1	11.8683	91.4454	114.545
1142	Irvine et al., 2014	Balaenoptera musculus	Northeast Pacific	1999CA-ST15-04176	36575.6	11.8637	91.0631	114.151
1143	Irvine et al., 2014	Balaenoptera musculus	Northeast Pacific	1999CA-ST15-04176	36576.6	11.8313	90.6781	113.702
1144	Irvine et al., 2014	Balaenoptera musculus	Northeast Pacific	1999CA-ST15-04176	36577.6	11.883	90.2366	113.362
1145	Irvine et al., 2014	Balaenoptera musculus	Northeast Pacific	1999CA-ST15-04176	36578.1	11.9303	89.7625	112.984
1146	Irvine et al., 2014	Balaenoptera musculus	Northeast Pacific	1999CA-ST15-04176	36579.1	11.8357	89.451	112.482
1147	Irvine et al., 2014	Balaenoptera musculus	Northeast Pacific	1999CA-ST15-04176	36580.1	11.8921	88.9836	112.127
1148	Irvine et al., 2014	Balaenoptera musculus	Northeast Pacific	1999CA-ST15-04176	36582.5	11.8319	88.207	111.23
1149	Irvine et al., 2014	Balaenoptera musculus	Northeast Pacific	1999CA-ST15-04176	36583.1	11.9392	87.7066	110.941
1150	Irvine et al., 2014	Balaenoptera musculus	Northeast Pacific	1999CA-ST15-04176	36584.6	11.9333	87.2944	110.517
1151	Irvine et al., 2014	Balaenoptera musculus	Northeast Pacific	1999CA-ST15-04176	36586.9	11.9318	86.46	109.678
1152	Irvine et al., 2014	Balaenoptera musculus	Northeast Pacific	1999CA-ST15-04176	36587.1	11.9441	86.0288	109.271
1153	Irvine et al., 2014	Balaenoptera musculus	Northeast Pacific	1999CA-ST15-04176	36588.1	11.9356	85.6067	108.832
1154	Irvine et al., 2014	Balaenoptera musculus	Northeast Pacific	1999CA-ST15-04176	36589.1	11.9217	85.1927	108.391
1155	Irvine et al., 2014	Balaenoptera musculus	Northeast Pacific	1999CA-ST15-04176	36590.5	12.044	84.6666	108.105
1156	Irvine et al., 2014	Balaenoptera musculus	Northeast Pacific	1999CA-ST15-04176	36591.6	11.9469	84.3183	107.566
1157	Irvine et al., 2014	Balaenoptera musculus	Northeast Pacific	1999CA-ST15-04176	36592.1	11.9346	83.9011	107.125
1158	Irvine et al., 2014	Balaenoptera musculus	Northeast Pacific	1999CA-ST15-04176	36593.1	11.9592	83.4513	106.723
1159	Irvine et al., 2014	Balaenoptera musculus	Northeast Pacific	1999CA-ST15-04176	36594.7	11.6573	83.2928	105.97
1160	Irvine et al., 2014	Balaenoptera musculus	Northeast Pacific	1999CA-ST15-04176	36595.4	11.5776	82.9517	105.468
1161	Irvine et al., 2014	Balaenoptera musculus	Northeast Pacific	1999CA-ST15-04176	36596.1	11.5188	82.5791	104.98
1162	Irvine et al., 2014	Balaenoptera musculus	Northeast Pacific	1999CA-ST15-04176	36597.6	10.6535	82.9487	103.649
1163	Irvine et al., 2014	Balaenoptera musculus	Northeast Pacific	1999CA-ST15-04176	36598.1	10.546	82.6349	103.123
1164	Irvine et al., 2014	Balaenoptera musculus	Northeast Pacific	1999CA-ST15-04176	36602.1	9.91767	81.5843	100.849
1165	Irvine et al., 2014	Balaenoptera musculus	Northeast Pacific	1999CA-ST15-04176	36603.5	9.59551	81.4948	100.135
1166	Irvine et al., 2014	Balaenoptera musculus	Northeast Pacific	1999CA-ST15-04176	36604.6	9.89739	80.7919	100.035
1167	Irvine et al., 2014	Balaenoptera musculus	Northeast Pacific	1999CA-ST15-04176	36607.6	10.6361	78.8373	99.5347
1168	Irvine et al., 2014	Balaenoptera musculus	Northeast Pacific	1999CA-ST15-04176	36609.5	11.0821	77.556	99.1255
1169	Irvine et al., 2014	Balaenoptera musculus	Northeast Pacific	1999CA-ST15-04176	36610.1	11.1633	77.0659	98.798
1170	Irvine et al., 2014	Balaenoptera musculus	Northeast Pacific	1999CA-ST15-04176	36612.6	11.2646	76.1377	98.068
1171	Irvine et al., 2014	Balaenoptera musculus	Northeast Pacific	1999CA-ST15-04176	36614.6	11.6137	74.9344	97.55
1172	Irvine et al., 2014	Balaenoptera musculus	Northeast Pacific	1999CA-ST15-04176	36617.5	12.2322	73.0109	96.8453
1173	Irvine et al., 2014	Balaenoptera musculus	Northeast Pacific	1999CA-ST15-04176	36618.5	12.3463	72.4838	96.5464
1174	Irvine et al., 2014	Balaenoptera musculus	Northeast Pacific	1999CA-ST15-04176	36619.6	11.8479	72.5536	95.6163
1175	Irvine et al., 2014	Balaenoptera musculus	Northeast Pacific	1999CA-ST15-04176	36620.1	11.3194	72.646	94.6473
1176	Irvine et al., 2014	Balaenoptera musculus	Northeast Pacific	1999CA-ST15-04176	36621.4	12.0512	71.4772	94.9379
1177	Irvine et al., 2014	Balaenoptera musculus	Northeast Pacific	1999CA-ST15-04176	36622.6	12.3259	70.8514	94.8718
1178	Irvine et al., 2014	Balaenoptera musculus	Northeast Pacific	1999CA-ST15-04176	36623.1	12.3371	70.4387	94.4827
1179	Irvine et al., 2014	Balaenoptera musculus	Northeast Pacific	1999CA-ST15-04176	36624.1	11.8796	70.492	93.6214
1180	Irvine et al., 2014	Balaenoptera musculus	Northeast Pacific	1999CA-ST15-04176	36625.1	11.8883	70.0638	93.2086
1181	Irvine et al., 2014	Balaenoptera musculus	Northeast Pacific	1999CA-ST15-04176	36626.6	11.8467	69.6897	92.7499
1182	Irvine et al., 2014	Balaenoptera musculus	Northeast Pacific	1999CA-ST15-04176	36627.6	11.7246	69.42	92.2376
1183	Irvine et al., 2014	Balaenoptera musculus	Northeast Pacific	1999CA-ST15-04176	36629.1	11.4624	68.8908	91.1853
1184	Irvine et al., 2014	Balaenoptera musculus	Northeast Pacific	1999CA-ST15-04176	36632.6	11.2435	68.1699	90.0573
1185	Irvine et al., 2014	Balaenoptera musculus	Northeast Pacific	1999CA-ST15-04176	36633.6	11.0754	68.017	89.5764
1186	Irvine et al., 2014	Balaenoptera musculus	Northeast Pacific	1999CA-ST15-04176	36634.5	10.8753	67.8746	89.0388
1187	Irvine et al., 2014	Balaenoptera musculus	Northeast Pacific	1999CA-ST15-04176	36641.1	10.3278	66.0092	86.1013
1188	Irvine et al., 2014	Balaenoptera musculus	Northeast Pacific	1999CA-ST15-04176	36643.6	10.4827	65.0785	85.474
1189	Irvine et al., 2014	Balaenoptera musculus	Northeast Pacific	1999CA-ST15-04176	36650.1	10.8462	62.3273	83.4562
1190	Irvine et al., 2014	Balaenoptera musculus	Northeast Pacific	1999CA-ST15-10821	36441.8	14.1837	82.1023	110.065
1191	Irvine et al., 2014	Balaenoptera musculus	Northeast Pacific	1999CA-ST15-10821	36476.6	9.73433	98.8603	118.028
1192	Irvine et al., 2014	Balaenoptera musculus	Northeast Pacific	1999CA-ST15-10821	36477.5	9.80573	99.105	118.413
1193	Irvine et al., 2014	Balaenoptera musculus	Northeast Pacific	1999CA-ST15-10821	36478.6	9.68867	99.4978	118.574
1194	Irvine et al., 2014	Balaenoptera musculus	Northeast Pacific	1999CA-ST15-10821	36479.6	9.73755	99.8334	118.996
1195	Irvine et al., 2014	Balaenoptera musculus	Northeast Pacific	1999CA-ST15-10821	36480.6	10.089	99.9231	119.773
1196	Irvine et al., 2014	Balaenoptera musculus	Northeast Pacific	1999CA-ST15-10821	36481.6	10.2572	100.123	120.3
1197	Irvine et al., 2014	Balaenoptera musculus	Northeast Pacific	1999CA-ST15-10821	36482.1	10.2597	100.436	120.614
1198	Irvine et al., 2014	Balaenoptera musculus	Northeast Pacific	1999CA-ST15-10821	36483.6	10.9015	100.353	121.788
1199	Irvine et al., 2014	Balaenoptera musculus	Northeast Pacific	1999CA-ST15-10821	36486.5	11.0602	101.115	122.852
1200	Irvine et al., 2014	Balaenoptera musculus	Northeast Pacific	1999CA-ST15-10821	36487.6	10.7407	101.385	122.507
1201	Irvine et al., 2014	Balaenoptera musculus	Northeast Pacific	1999CA-ST15-10821	36488.6	9.32168	102.762	121.069
1202	Irvine et al., 2014	Balaenoptera musculus	Northeast Pacific	1999CA-ST15-10821	36489.6	10.0907	102.239	122.082
1203	Irvine et al., 2014	Balaenoptera musculus	Northeast Pacific	1999CA-ST15-10821	36491.6	9.63116	102.85	121.798
1204	Irvine et al., 2014	Balaenoptera musculus	Northeast Pacific	1999CA-ST15-10821	36492.6	9.87595	102.762	122.203
1205	Irvine et al., 2014	Balaenoptera musculus	Northeast Pacific	1999CA-ST15-10821	36493.1	9.7501	103.048	122.241
1206	Irvine et al., 2014	Balaenoptera musculus	Northeast Pacific	1999CA-ST15-10821	36495.6	9.92566	103.217	122.761
1207	Irvine et al., 2014	Balaenoptera musculus	Northeast Pacific	1999CA-ST15-10824	36368.8	14.1808	52.5146	80.4208
1208	Irvine et al., 2014	Balaenoptera musculus	Northeast Pacific	1999CA-ST15-10824	36370.2	14.0599	53.2851	80.9576
1209	Irvine et al., 2014	Balaenoptera musculus	Northeast Pacific	1999CA-ST15-10824	36372.2	13.7592	54.1665	81.2404
1210	Irvine et al., 2014	Balaenoptera musculus	Northeast Pacific	1999CA-ST15-10824	36380.7	14.9497	55.217	84.6632
1211	Irvine et al., 2014	Balaenoptera musculus	Northeast Pacific	1999CA-ST15-10824	36383	14.5785	56.3446	85.0536
1212	Irvine et al., 2014	Balaenoptera musculus	Northeast Pacific	1999CA-ST15-10824	36383.7	14.6761	56.5793	85.4829
1213	Irvine et al., 2014	Balaenoptera musculus	Northeast Pacific	1999CA-ST15-10824	36385.7	14.7037	57.2911	86.252
1214	Irvine et al., 2014	Balaenoptera musculus	Northeast Pacific	1999CA-ST15-10824	36386.5	14.9172	57.2989	86.6785
1215	Irvine et al., 2014	Balaenoptera musculus	Northeast Pacific	1999CA-ST15-10824	36389.7	15.4793	57.6091	88.0981
1216	Irvine et al., 2014	Balaenoptera musculus	Northeast Pacific	1999CA-ST15-10824	36390	15.4681	58.0668	88.5368
1217	Irvine et al., 2014	Balaenoptera musculus	Northeast Pacific	1999CA-ST15-10824	36391.1	15.4998	58.3976	88.9292
1218	Irvine et al., 2014	Balaenoptera musculus	Northeast Pacific	1999CA-ST15-10824	36394.2	14.1942	61.69	89.6681
1219	Irvine et al., 2014	Balaenoptera musculus	Northeast Pacific	1999CA-ST15-10824	36396.5	14.2373	62.4903	90.5595
1220	Irvine et al., 2014	Balaenoptera musculus	Northeast Pacific	1999CA-ST15-10824	36397.5	14.2461	62.8873	90.9749
1221	Irvine et al., 2014	Balaenoptera musculus	Northeast Pacific	1999CA-ST15-10824	36398.5	13.999	63.5884	91.1867
1222	Irvine et al., 2014	Balaenoptera musculus	Northeast Pacific	1999CA-ST15-10824	36399.5	14.1715	63.7858	91.7263
1223	Irvine et al., 2014	Balaenoptera musculus	Northeast Pacific	1999CA-ST15-10824	36400.1	14.3595	63.9846	92.2989
1224	Irvine et al., 2014	Balaenoptera musculus	Northeast Pacific	1999CA-ST15-10824	36401.2	14.2759	64.5082	92.6584
1225	Irvine et al., 2014	Balaenoptera musculus	Northeast Pacific	1999CA-ST15-10824	36402.6	14.3317	64.8619	93.1233
1226	Irvine et al., 2014	Balaenoptera musculus	Northeast Pacific	1999CA-ST15-10824	36404.2	14.2518	65.7968	93.9011
1227	Irvine et al., 2014	Balaenoptera musculus	Northeast Pacific	1999CA-ST15-10824	36405.5	14.2686	66.1995	94.3375
1228	Irvine et al., 2014	Balaenoptera musculus	Northeast Pacific	1999CA-ST15-10824	36406.5	14.2354	66.6616	94.7342
1229	Irvine et al., 2014	Balaenoptera musculus	Northeast Pacific	1999CA-ST15-10824	36407.5	14.2288	67.1011	95.1618
1230	Irvine et al., 2014	Balaenoptera musculus	Northeast Pacific	1999CA-ST15-10824	36408	14.0955	67.6836	95.4809
1231	Irvine et al., 2014	Balaenoptera musculus	Northeast Pacific	1999CA-ST15-10824	36409.1	14.2281	67.9537	96.0129
1232	Irvine et al., 2014	Balaenoptera musculus	Northeast Pacific	1999CA-ST15-10824	36410.7	14.1905	68.4143	96.3975
1233	Irvine et al., 2014	Balaenoptera musculus	Northeast Pacific	1999CA-ST15-10824	36412	14.1867	68.8702	96.8491
1234	Irvine et al., 2014	Balaenoptera musculus	Northeast Pacific	1999CA-ST15-10824	36413.5	14.2726	69.6083	97.7514
1235	Irvine et al., 2014	Balaenoptera musculus	Northeast Pacific	1999CA-ST15-10824	36414.7	14.1793	70.1685	98.131
1236	Irvine et al., 2014	Balaenoptera musculus	Northeast Pacific	1999CA-ST15-10824	36415	14.1961	70.5863	98.582
1237	Irvine et al., 2014	Balaenoptera musculus	Northeast Pacific	1999CA-ST15-10824	36416.7	14.2333	70.9913	99.0623
1238	Irvine et al., 2014	Balaenoptera musculus	Northeast Pacific	1999CA-ST15-10824	36417.2	14.2181	71.4471	99.4884
1239	Irvine et al., 2014	Balaenoptera musculus	Northeast Pacific	1999CA-ST15-10824	36418.1	14.2309	71.875	99.9423
1240	Irvine et al., 2014	Balaenoptera musculus	Northeast Pacific	1999CA-ST15-10824	36419	14.1875	72.361	100.342
1241	Irvine et al., 2014	Balaenoptera musculus	Northeast Pacific	1999CA-ST15-10824	36421.5	14.1734	73.2408	101.188
1242	Irvine et al., 2014	Balaenoptera musculus	Northeast Pacific	1999CA-ST15-10824	36422.2	14.3134	73.5423	101.768
1243	Irvine et al., 2014	Balaenoptera musculus	Northeast Pacific	1999CA-ST15-10824	36423.5	14.2785	74.0199	102.174
1244	Irvine et al., 2014	Balaenoptera musculus	Northeast Pacific	1999CA-ST15-10824	36424.5	14.2914	74.4556	102.637
1245	Irvine et al., 2014	Balaenoptera musculus	Northeast Pacific	1999CA-ST15-10824	36425.5	14.2689	74.9222	103.058
1246	Irvine et al., 2014	Balaenoptera musculus	Northeast Pacific	1999CA-ST15-10824	36426.2	14.2386	75.3985	103.473
1247	Irvine et al., 2014	Balaenoptera musculus	Northeast Pacific	1999CA-ST15-10824	36427.7	14.1817	75.9016	103.865
1248	Irvine et al., 2014	Balaenoptera musculus	Northeast Pacific	1999CA-ST15-10824	36428.5	14.2738	76.2552	104.401
1249	Irvine et al., 2014	Balaenoptera musculus	Northeast Pacific	1999CA-ST15-10824	36430	14.2537	76.7216	104.826
1250	Irvine et al., 2014	Balaenoptera musculus	Northeast Pacific	1999CA-ST15-10824	36430.2	14.2536	77.1679	105.272
1251	Irvine et al., 2014	Balaenoptera musculus	Northeast Pacific	1999CA-ST15-10824	36431.2	14.2818	77.5882	105.746
1252	Irvine et al., 2014	Balaenoptera musculus	Northeast Pacific	1999CA-ST15-10824	36432.7	14.2962	78.0232	106.208
1253	Irvine et al., 2014	Balaenoptera musculus	Northeast Pacific	1999CA-ST15-10824	36433.7	14.254	78.5	106.606
1254	Irvine et al., 2014	Balaenoptera musculus	Northeast Pacific	1999CA-ST15-10824	36435.2	14.159	79.4746	107.393
1255	Irvine et al., 2014	Balaenoptera musculus	Northeast Pacific	1999CA-ST15-10824	36437	14.1436	79.9312	107.818
1256	Irvine et al., 2014	Balaenoptera musculus	Northeast Pacific	1999CA-ST15-10824	36437.6	13.9571	80.5429	108.061
1257	Irvine et al., 2014	Balaenoptera musculus	Northeast Pacific	1999CA-ST15-10824	36438.5	14.1693	80.7913	108.728
1258	Irvine et al., 2014	Balaenoptera musculus	Northeast Pacific	1999CA-ST15-10824	36439.2	14.121	81.2782	109.118
1259	Irvine et al., 2014	Balaenoptera musculus	Northeast Pacific	1999CA-ST15-10824	36440.2	14.1246	81.7158	109.562
1260	Irvine et al., 2014	Balaenoptera musculus	Northeast Pacific	1999CA-ST15-10824	36441.2	14.1684	82.116	110.048
1261	Irvine et al., 2014	Balaenoptera musculus	Northeast Pacific	1999CA-ST15-10824	36442.2	14.0346	82.6735	110.34
1262	Irvine et al., 2014	Balaenoptera musculus	Northeast Pacific	1999CA-ST15-10824	36444.2	13.0881	84.2221	110.044
1263	Irvine et al., 2014	Balaenoptera musculus	Northeast Pacific	1999CA-ST15-10824	36446	12.6419	84.9755	109.926
1264	Irvine et al., 2014	Balaenoptera musculus	Northeast Pacific	1999CA-ST15-10824	36446	12.657	85.3751	110.354
1265	Irvine et al., 2014	Balaenoptera musculus	Northeast Pacific	1999CA-ST15-10824	36447.7	12.3515	86.0145	110.396
1266	Irvine et al., 2014	Balaenoptera musculus	Northeast Pacific	1999CA-ST15-10824	36449.5	12.0374	86.9745	110.756
1267	Irvine et al., 2014	Balaenoptera musculus	Northeast Pacific	1999CA-ST15-10824	36450.7	11.7413	87.5822	110.787
1268	Irvine et al., 2014	Balaenoptera musculus	Northeast Pacific	1999CA-ST15-10824	36451.6	11.5188	88.1292	110.901
1269	Irvine et al., 2014	Balaenoptera musculus	Northeast Pacific	1999CA-ST15-10824	36452.2	11.5557	88.4556	111.304
1270	Irvine et al., 2014	Balaenoptera musculus	Northeast Pacific	1999CA-ST15-10824	36453.2	11.3895	88.9462	111.473
1271	Irvine et al., 2014	Balaenoptera musculus	Northeast Pacific	1999CA-ST15-10824	36454.5	11.4875	89.2526	111.97
1272	Irvine et al., 2014	Balaenoptera musculus	Northeast Pacific	1999CA-ST15-10824	36455.5	11.6338	89.4941	112.502
1273	Irvine et al., 2014	Balaenoptera musculus	Northeast Pacific	1999CA-ST15-10824	36456.5	11.5954	89.8716	112.808
1274	Irvine et al., 2014	Balaenoptera musculus	Northeast Pacific	1999CA-ST15-10824	36457.2	11.5422	90.2706	113.105
1275	Irvine et al., 2014	Balaenoptera musculus	Northeast Pacific	1999CA-ST15-10824	36461.2	11.3735	91.8673	114.367
1276	Irvine et al., 2014	Balaenoptera musculus	Northeast Pacific	1999CA-ST15-10824	36462.2	11.3738	92.202	114.705
1277	Irvine et al., 2014	Balaenoptera musculus	Northeast Pacific	1999CA-ST15-10824	36463.1	11.2393	92.6833	114.918
1278	Irvine et al., 2014	Balaenoptera musculus	Northeast Pacific	1999CA-ST15-10824	36480.7	9.40377	99.5636	118.166
1279	Irvine et al., 2014	Balaenoptera musculus	Northeast Pacific	1999CA-ST15-23030	36441.8	14.1943	82.0929	110.076
1280	Irvine et al., 2014	Balaenoptera musculus	Northeast Pacific	1999CA-ST15-23030	36442.1	14.1542	82.5692	110.472
1281	Irvine et al., 2014	Balaenoptera musculus	Northeast Pacific	1999CA-ST15-23030	36443.6	14.3796	82.8224	111.168
1282	Irvine et al., 2014	Balaenoptera musculus	Northeast Pacific	1999CA-ST15-23030	36444.6	14.175	83.4649	111.401
1283	Irvine et al., 2014	Balaenoptera musculus	Northeast Pacific	1999CA-ST15-23030	36445.1	14.2825	83.7921	111.943
1284	Irvine et al., 2014	Balaenoptera musculus	Northeast Pacific	1999CA-ST15-23030	36446.4	14.1936	84.2933	112.269
1285	Irvine et al., 2014	Balaenoptera musculus	Northeast Pacific	1999CA-ST15-23030	36447.6	14.2001	84.7192	112.707
1286	Irvine et al., 2014	Balaenoptera musculus	Northeast Pacific	1999CA-ST15-23030	36448.1	14.2729	85.0895	113.221
1287	Irvine et al., 2014	Balaenoptera musculus	Northeast Pacific	1999CA-ST15-23030	36449.1	14.2786	85.5698	113.704
1288	Irvine et al., 2014	Balaenoptera musculus	Northeast Pacific	1999CA-ST15-23030	36450.1	14.2597	85.9665	114.069
1289	Irvine et al., 2014	Balaenoptera musculus	Northeast Pacific	1999CA-ST15-23030	36451.6	14.181	86.5292	114.467
1290	Irvine et al., 2014	Balaenoptera musculus	Northeast Pacific	1999CA-ST15-23030	36452.6	14.0802	87.0137	114.754
1291	Irvine et al., 2014	Balaenoptera musculus	Northeast Pacific	1999CA-ST15-23030	36453.4	14.1641	87.3532	115.26
1292	Irvine et al., 2014	Balaenoptera musculus	Northeast Pacific	1999CA-ST15-23030	36454.6	14.2291	87.7346	115.768
1293	Irvine et al., 2014	Balaenoptera musculus	Northeast Pacific	1999CA-ST15-23030	36455.1	14.2033	88.1934	116.173
1294	Irvine et al., 2014	Balaenoptera musculus	Northeast Pacific	1999CA-ST15-23030	36456.6	14.1686	88.6342	116.544
1295	Irvine et al., 2014	Balaenoptera musculus	Northeast Pacific	1999CA-ST15-23030	36457.1	14.0592	89.1491	116.84
1296	Irvine et al., 2014	Balaenoptera musculus	Northeast Pacific	1999CA-ST15-23030	36459.1	13.5949	90.3634	117.13
1297	Irvine et al., 2014	Balaenoptera musculus	Northeast Pacific	1999CA-ST15-23030	36462.9	13.3358	91.6752	117.934
1298	Irvine et al., 2014	Balaenoptera musculus	Northeast Pacific	1999CA-ST15-23030	36464.1	12.8941	92.759	118.144
1299	Irvine et al., 2014	Balaenoptera musculus	Northeast Pacific	1999CA-ST15-23030	36466.6	12.7383	93.462	118.551
1300	Irvine et al., 2014	Balaenoptera musculus	Northeast Pacific	1999CA-ST15-23030	36467.1	12.1953	94.1563	118.179
1301	Irvine et al., 2014	Balaenoptera musculus	Northeast Pacific	1999CA-ST15-23030	36469.6	11.3691	95.6666	118.037
1302	Irvine et al., 2014	Balaenoptera musculus	Northeast Pacific	1999CA-ST15-23030	36472.6	11.7039	96.2023	119.254
1303	Irvine et al., 2014	Balaenoptera musculus	Northeast Pacific	1999CA-ST15-23030	36473.1	11.6523	96.6246	119.569
1304	Irvine et al., 2014	Balaenoptera musculus	Northeast Pacific	1999CA-ST15-23030	36474.6	11.724	96.8755	119.962
1305	Irvine et al., 2014	Balaenoptera musculus	Northeast Pacific	1999CA-ST15-23030	36475.1	12.007	96.9757	120.622
1306	Irvine et al., 2014	Balaenoptera musculus	Northeast Pacific	1999CA-ST15-23030	36477.1	12.1791	97.4538	121.441
1307	Irvine et al., 2014	Balaenoptera musculus	Northeast Pacific	1999CA-ST15-23030	36478.6	12.074	97.8858	121.66
1308	Irvine et al., 2014	Balaenoptera musculus	Northeast Pacific	1999CA-ST15-23030	36481.6	11.4845	99.0656	121.682
1309	Irvine et al., 2014	Balaenoptera musculus	Northeast Pacific	1999CA-ST15-23030	36484.6	10.9061	100.188	121.67
1310	Irvine et al., 2014	Balaenoptera musculus	Northeast Pacific	1999CA-ST15-23030	36485.1	10.691	100.606	121.661
1311	Irvine et al., 2014	Balaenoptera musculus	Northeast Pacific	1999CA-ST15-23030	36486.5	10.2659	101.139	121.357
1312	Irvine et al., 2014	Balaenoptera musculus	Northeast Pacific	1999CA-ST15-23030	36487.6	10.4339	101.2	121.754
1313	Irvine et al., 2014	Balaenoptera musculus	Northeast Pacific	1999CA-ST15-23030	36489.6	10.3723	101.801	122.222
1314	Irvine et al., 2014	Balaenoptera musculus	Northeast Pacific	1999CA-ST15-23030	36491.4	10.3569	102.302	122.685
1315	Irvine et al., 2014	Balaenoptera musculus	Northeast Pacific	1999CA-ST15-23030	36492.6	11.2394	102.068	124.176
1316	Irvine et al., 2014	Balaenoptera musculus	Northeast Pacific	1999CA-ST15-23030	36493.6	10.327	102.666	122.993
1317	Irvine et al., 2014	Balaenoptera musculus	Northeast Pacific	1999CA-ST15-23030	36494.5	10.1738	103.005	123.025
1318	Irvine et al., 2014	Balaenoptera musculus	Northeast Pacific	1999CA-ST15-23030	36495.6	10.3296	103.088	123.413
1319	Irvine et al., 2014	Balaenoptera musculus	Northeast Pacific	1999CA-ST15-23030	36496.5	10.3083	103.274	123.556
1320	Irvine et al., 2014	Balaenoptera musculus	Northeast Pacific	1999CA-ST15-23030	36497.6	10.3163	103.468	123.762
1321	Irvine et al., 2014	Balaenoptera musculus	Northeast Pacific	1999CA-ST15-23030	36498.1	10.1838	103.738	123.766
1322	Irvine et al., 2014	Balaenoptera musculus	Northeast Pacific	1999CA-ST15-23030	36499.1	10.4352	103.749	124.268
1323	Irvine et al., 2014	Balaenoptera musculus	Northeast Pacific	1999CA-ST15-23030	36500.6	10.2493	104.042	124.191
1324	Irvine et al., 2014	Balaenoptera musculus	Northeast Pacific	1999CA-ST15-23030	36502.1	10.355	104.333	124.677
1325	Irvine et al., 2014	Balaenoptera musculus	Northeast Pacific	1999CA-ST15-23030	36504.5	10.2218	104.768	124.836
1326	Irvine et al., 2014	Balaenoptera musculus	Northeast Pacific	1999CA-ST15-23030	36508.6	9.69796	105.573	124.59
1327	Irvine et al., 2014	Balaenoptera musculus	Northeast Pacific	1999CA-ST15-23030	36509.4	9.97831	105.382	124.955
1328	Irvine et al., 2014	Balaenoptera musculus	Northeast Pacific	1999CA-ST15-23030	36510.6	10.3771	105.077	125.443
1329	Irvine et al., 2014	Balaenoptera musculus	Northeast Pacific	1999CA-ST15-23030	36515.9	10.004	106.038	125.608
1330	Irvine et al., 2014	Balaenoptera musculus	Northeast Pacific	1999CA-ST15-23030	36519.6	9.95484	106.126	125.579
1331	Irvine et al., 2014	Balaenoptera musculus	Northeast Pacific	1999CA-ST15-23030	36520.1	10.0728	105.963	125.65
1332	Irvine et al., 2014	Balaenoptera musculus	Northeast Pacific	1999CA-ST15-23030	36521.1	10.3099	105.619	125.782
1333	Irvine et al., 2014	Balaenoptera musculus	Northeast Pacific	1999CA-ST15-23030	36523.6	9.75132	105.834	124.89
1334	Irvine et al., 2014	Balaenoptera musculus	Northeast Pacific	1999CA-ST15-23030	36526.6	9.68884	105.873	124.777
1335	Irvine et al., 2014	Balaenoptera musculus	Northeast Pacific	1999CA-ST15-23030	36527.6	9.72245	105.745	124.713
1336	Irvine et al., 2014	Balaenoptera musculus	Northeast Pacific	1999CA-ST15-23030	36529.1	9.79487	105.439	124.546
1337	Irvine et al., 2014	Balaenoptera musculus	Northeast Pacific	1999CA-ST15-23030	36531.1	9.75818	105.174	124.204
1338	Irvine et al., 2014	Balaenoptera musculus	Northeast Pacific	1999CA-ST15-23030	36532.6	10.5321	104.095	124.683
1339	Irvine et al., 2014	Balaenoptera musculus	Northeast Pacific	1999CA-ST15-23030	36533.9	10.0927	104.573	124.264
1340	Irvine et al., 2014	Balaenoptera musculus	Northeast Pacific	1999CA-ST15-23030	36534.1	9.87249	104.574	123.825
1341	Irvine et al., 2014	Balaenoptera musculus	Northeast Pacific	1999CA-ST15-23030	36535.1	9.74232	104.482	123.475
1342	Irvine et al., 2014	Balaenoptera musculus	Northeast Pacific	1999CA-ST15-23030	36536.6	9.86127	104.313	123.53
1343	Irvine et al., 2014	Balaenoptera musculus	Northeast Pacific	1999CA-ST15-23030	36538.1	9.8394	103.815	122.993
1344	Irvine et al., 2014	Balaenoptera musculus	Northeast Pacific	1999CA-ST15-23030	36539.1	9.93508	103.491	122.86
1345	Irvine et al., 2014	Balaenoptera musculus	Northeast Pacific	1999CA-ST15-23030	36540.9	9.59867	103.428	122.137
1346	Irvine et al., 2014	Balaenoptera musculus	Northeast Pacific	1999CA-ST15-23030	36541.5	9.98534	102.992	122.458
1347	Irvine et al., 2014	Balaenoptera musculus	Northeast Pacific	1999CA-ST15-23030	36542.1	9.71264	103.018	121.938
1348	Irvine et al., 2014	Balaenoptera musculus	Northeast Pacific	1999CA-ST15-23030	36543.1	9.69233	102.809	121.685
1349	Irvine et al., 2014	Balaenoptera musculus	Northeast Pacific	1999CA-ST15-23030	36544.6	9.67065	102.644	121.47
1350	Irvine et al., 2014	Balaenoptera musculus	Northeast Pacific	1999CA-ST15-23030	36545.6	10.0827	102.187	121.818
1351	Irvine et al., 2014	Balaenoptera musculus	Northeast Pacific	1999CA-ST15-23030	36546.6	9.76999	102.144	121.156
1352	Irvine et al., 2014	Balaenoptera musculus	Northeast Pacific	1999CA-ST15-23030	36547.6	10.0598	101.648	121.233
1353	Irvine et al., 2014	Balaenoptera musculus	Northeast Pacific	1999CA-ST15-23030	36548.5	9.97805	101.534	120.947
1354	Irvine et al., 2014	Balaenoptera musculus	Northeast Pacific	1999CA-ST15-23030	36549.1	10.3859	100.927	121.148
1355	Irvine et al., 2014	Balaenoptera musculus	Northeast Pacific	1999CA-ST15-23030	36550.5	10.2053	100.806	120.665
1356	Irvine et al., 2014	Balaenoptera musculus	Northeast Pacific	1999CA-ST15-23030	36551.6	10.1964	100.49	120.332
1357	Irvine et al., 2014	Balaenoptera musculus	Northeast Pacific	1999CA-ST15-23030	36552.1	10.1871	100.201	120.023
1358	Irvine et al., 2014	Balaenoptera musculus	Northeast Pacific	1999CA-ST15-23030	36553.1	10.235	99.8162	119.735
1359	Irvine et al., 2014	Balaenoptera musculus	Northeast Pacific	1999CA-ST15-23030	36556.1	10.1474	98.9528	118.693
1360	Irvine et al., 2014	Balaenoptera musculus	Northeast Pacific	1999CA-ST15-23030	36557.6	10.3553	98.4534	118.605
1361	Irvine et al., 2014	Balaenoptera musculus	Northeast Pacific	1999CA-ST15-23030	36558.5	10.0584	98.3606	117.923
1362	Irvine et al., 2014	Balaenoptera musculus	Northeast Pacific	1999CA-ST15-23030	36559.5	9.94896	98.0466	117.397
1363	Irvine et al., 2014	Balaenoptera musculus	Northeast Pacific	1999CA-ST15-23030	36560.6	9.74543	97.9434	116.883
1364	Irvine et al., 2014	Balaenoptera musculus	Northeast Pacific	1999CA-ST15-23030	36562.1	10.093	97.0213	116.644
1365	Irvine et al., 2014	Balaenoptera musculus	Northeast Pacific	1999CA-ST15-23030	36563.6	10.0868	96.7246	116.329
1366	Irvine et al., 2014	Balaenoptera musculus	Northeast Pacific	1999CA-ST15-23030	36565.6	10.0735	95.979	115.56
1367	Irvine et al., 2014	Balaenoptera musculus	Northeast Pacific	1999CA-ST15-23030	36566.6	10.166	95.4922	115.261
1368	Irvine et al., 2014	Balaenoptera musculus	Northeast Pacific	1999CA-ST15-23030	36569.6	10.5329	94.1649	114.651
1369	Irvine et al., 2014	Balaenoptera musculus	Northeast Pacific	1999CA-ST15-23030	36570.6	10.1694	94.0783	113.844
1370	Irvine et al., 2014	Balaenoptera musculus	Northeast Pacific	1999CA-ST15-23030	36571.6	10.1727	93.6626	113.439
1371	Irvine et al., 2014	Balaenoptera musculus	Northeast Pacific	1999CA-ST15-23030	36572.5	9.73976	93.6054	112.529
1372	Irvine et al., 2014	Balaenoptera musculus	Northeast Pacific	1999CA-ST15-23030	36573.6	10.1647	92.9235	112.682
1373	Irvine et al., 2014	Balaenoptera musculus	Northeast Pacific	1999CA-ST15-23030	36574.1	10.2907	92.358	112.375
1374	Irvine et al., 2014	Balaenoptera musculus	Northeast Pacific	1999CA-ST15-23030	36575.1	10.2188	92.0344	111.909
1375	Irvine et al., 2014	Balaenoptera musculus	Northeast Pacific	1999CA-ST15-23030	36577.4	9.99727	91.5013	110.93
1376	Irvine et al., 2014	Balaenoptera musculus	Northeast Pacific	1999CA-ST15-23030	36578.1	10.3133	90.8105	110.869
1377	Irvine et al., 2014	Balaenoptera musculus	Northeast Pacific	1999CA-ST15-23030	36579.1	10.027	90.6984	110.185
1378	Irvine et al., 2014	Balaenoptera musculus	Northeast Pacific	1999CA-ST15-23030	36580.6	10.2811	90.0521	110.047
1379	Irvine et al., 2014	Balaenoptera musculus	Northeast Pacific	1999CA-ST15-23030	36581.5	9.82831	90.157	109.239
1380	Irvine et al., 2014	Balaenoptera musculus	Northeast Pacific	1999CA-ST15-23030	36582.6	9.56866	89.99	108.557
1381	Irvine et al., 2014	Balaenoptera musculus	Northeast Pacific	1999CA-ST15-23030	36583.5	10.2516	88.9035	108.838
1382	Irvine et al., 2014	Balaenoptera musculus	Northeast Pacific	1999CA-ST15-23030	36584.1	10.1938	88.5615	108.381
1383	Irvine et al., 2014	Balaenoptera musculus	Northeast Pacific	1999CA-ST15-23030	36585.6	9.57038	88.7147	107.302
1384	Irvine et al., 2014	Balaenoptera musculus	Northeast Pacific	1999CA-ST15-23030	36586.4	9.64874	88.2045	106.956
1385	Irvine et al., 2014	Balaenoptera musculus	Northeast Pacific	1999CA-ST15-23030	36592.1	9.80702	85.7396	104.785
1386	Irvine et al., 2014	Balaenoptera musculus	Northeast Pacific	1999CA-ST15-23030	36593.5	10.0783	85.0644	104.652
1387	Irvine et al., 2014	Balaenoptera musculus	Northeast Pacific	1999CA-ST15-23030	36594.5	9.99693	84.7425	104.167
1388	Irvine et al., 2014	Balaenoptera musculus	Northeast Pacific	1999CA-ST15-23030	36595.6	10.3152	84.0309	104.088
1389	Irvine et al., 2014	Balaenoptera musculus	Northeast Pacific	1999CA-ST15-23030	36596.6	9.78143	84.141	103.138
1390	Irvine et al., 2014	Balaenoptera musculus	Northeast Pacific	1999CA-ST15-23030	36600.6	10.1598	82.125	101.898
1391	Irvine et al., 2014	Balaenoptera musculus	Northeast Pacific	1999CA-ST15-23030	36603.7	10.3977	80.6932	100.93
1392	Irvine et al., 2014	Balaenoptera musculus	Northeast Pacific	1999CA-ST15-23030	36604.6	10.386	80.3038	100.513
1393	Irvine et al., 2014	Balaenoptera musculus	Northeast Pacific	1999CA-ST15-23030	36609.5	11.0358	77.6185	99.1077
1394	Irvine et al., 2014	Balaenoptera musculus	Northeast Pacific	1999CA-ST15-23030	36612.7	11.0029	76.4309	97.8519
1395	Irvine et al., 2014	Balaenoptera musculus	Northeast Pacific	1999CA-ST15-23031	36436.7	14.1908	79.8904	107.87
1396	Irvine et al., 2014	Balaenoptera musculus	Northeast Pacific	1999CA-ST15-23031	36445.6	14.268	83.7877	111.912
1397	Irvine et al., 2014	Balaenoptera musculus	Northeast Pacific	1999CA-ST15-23031	36449.1	14.0981	85.6719	113.456
1398	Irvine et al., 2014	Balaenoptera musculus	Northeast Pacific	1999CA-ST15-23031	36453.1	14.1523	87.3484	115.234
1399	Irvine et al., 2014	Balaenoptera musculus	Northeast Pacific	1999CA-ST15-23031	36457.1	12.8227	89.938	115.203
1400	Irvine et al., 2014	Balaenoptera musculus	Northeast Pacific	1999CA-ST15-23031	36461.6	11.5916	92.1202	114.989
1401	Irvine et al., 2014	Balaenoptera musculus	Northeast Pacific	1999CA-ST15-23031	36462.6	11.187	92.8007	114.872
1402	Irvine et al., 2014	Balaenoptera musculus	Northeast Pacific	1999CA-ST15-23031	36464.4	10.9886	93.5656	115.258
1403	Irvine et al., 2014	Balaenoptera musculus	Northeast Pacific	1999CA-ST15-23031	36467.6	10.1628	95.2771	115.337
1404	Irvine et al., 2014	Balaenoptera musculus	Northeast Pacific	1999CA-ST15-23031	36468.5	10.3462	95.3982	115.829
1405	Irvine et al., 2014	Balaenoptera musculus	Northeast Pacific	1999CA-ST15-23031	36469.6	9.8901	96.1885	115.707
1406	Irvine et al., 2014	Balaenoptera musculus	Northeast Pacific	1999CA-ST15-23031	36470.9	9.62086	96.7123	115.701
1407	Irvine et al., 2014	Balaenoptera musculus	Northeast Pacific	1999CA-ST15-23031	36471.4	9.54435	97.1042	115.941
1408	Irvine et al., 2014	Balaenoptera musculus	Northeast Pacific	1999CA-ST15-23031	36473.6	9.31981	98.0775	116.45
1409	Irvine et al., 2014	Balaenoptera musculus	Northeast Pacific	1999CA-ST15-23031	36474.6	9.82252	97.9584	117.327
1410	Irvine et al., 2014	Balaenoptera musculus	Northeast Pacific	1999CA-ST15-23031	36476.6	9.60046	99.0025	117.902
1411	Irvine et al., 2014	Balaenoptera musculus	Northeast Pacific	1999CA-ST15-23031	36477.6	9.66144	99.2494	118.269
1412	Irvine et al., 2014	Balaenoptera musculus	Northeast Pacific	1999CA-ST15-23031	36478.6	9.69496	99.4867	118.575
1413	Irvine et al., 2014	Balaenoptera musculus	Northeast Pacific	1999CA-ST15-23031	36479.6	9.70785	99.8562	118.96
1414	Irvine et al., 2014	Balaenoptera musculus	Northeast Pacific	1999CA-ST15-23031	36481.6	10.3002	100.061	120.326
1415	Irvine et al., 2014	Balaenoptera musculus	Northeast Pacific	1999CA-ST15-23031	36486.5	11.0702	101.108	122.866
1416	Irvine et al., 2014	Balaenoptera musculus	Northeast Pacific	1999CA-ST15-23031	36487.6	10.6595	101.468	122.428
1417	Irvine et al., 2014	Balaenoptera musculus	Northeast Pacific	1999CA-ST15-23031	36488.5	9.63877	102.536	121.469
1418	Irvine et al., 2014	Balaenoptera musculus	Northeast Pacific	1999CA-ST15-23031	36489.4	9.55875	102.77	121.549
1419	Irvine et al., 2014	Balaenoptera musculus	Northeast Pacific	1999CA-ST15-23031	36509.1	10.5193	104.704	125.372
1420	Irvine et al., 2014	Balaenoptera musculus	Northeast Pacific	1999CA-ST15-23033	36361.8	14.1797	50.6218	78.5057
1421	Irvine et al., 2014	Balaenoptera musculus	Northeast Pacific	1999CA-ST15-23033	36362.2	14.1766	50.9055	78.7878
1422	Irvine et al., 2014	Balaenoptera musculus	Northeast Pacific	1999CA-ST15-23033	36363.2	14.4806	50.3882	78.8601
1423	Irvine et al., 2014	Balaenoptera musculus	Northeast Pacific	1999CA-ST15-23033	36364	14.7526	50.2145	79.226
1424	Irvine et al., 2014	Balaenoptera musculus	Northeast Pacific	1999CA-ST15-23033	36365.6	14.3028	51.4009	79.5362
1425	Irvine et al., 2014	Balaenoptera musculus	Northeast Pacific	1999CA-ST15-23033	36366.5	13.9232	52.306	79.6969
1426	Irvine et al., 2014	Balaenoptera musculus	Northeast Pacific	1999CA-ST15-23033	36391.5	10.8947	65.6662	87.2405
1427	Irvine et al., 2014	Balaenoptera musculus	Northeast Pacific	1999CA-ST15-23033	36395	11.3098	66.1462	88.5286
1428	Irvine et al., 2014	Balaenoptera musculus	Northeast Pacific	1999CA-ST15-23033	36397.5	11.5458	66.853	89.6873
1429	Irvine et al., 2014	Balaenoptera musculus	Northeast Pacific	1999CA-ST15-23033	36398.7	11.6117	67.0574	90.009
1430	Irvine et al., 2014	Balaenoptera musculus	Northeast Pacific	1999CA-ST15-23033	36399.7	11.6703	67.3988	90.4725
1431	Irvine et al., 2014	Balaenoptera musculus	Northeast Pacific	1999CA-ST15-23033	36400	11.5928	67.8391	90.7564
1432	Irvine et al., 2014	Balaenoptera musculus	Northeast Pacific	1999CA-ST15-23038	36363.7	14.1803	51.1337	79.025
1433	Irvine et al., 2014	Balaenoptera musculus	Northeast Pacific	1999CA-ST15-23038	36364.1	13.9034	51.8651	79.215
1434	Irvine et al., 2014	Balaenoptera musculus	Northeast Pacific	1999CA-ST15-23038	36365.5	14.1658	51.7031	79.5724
1435	Irvine et al., 2014	Balaenoptera musculus	Northeast Pacific	1999CA-ST15-23038	36366.7	14.1755	51.9702	79.8616
1436	Irvine et al., 2014	Balaenoptera musculus	Northeast Pacific	1999CA-ST15-23038	36367.2	14.171	52.2429	80.1273
1437	Irvine et al., 2014	Balaenoptera musculus	Northeast Pacific	1999CA-ST15-23038	36370.5	14.358	52.8391	81.1
1438	Irvine et al., 2014	Balaenoptera musculus	Northeast Pacific	1999CA-ST15-23038	36371.2	14.3657	53.1285	81.4068
1439	Irvine et al., 2014	Balaenoptera musculus	Northeast Pacific	1999CA-ST15-23038	36372.2	14.2293	53.6371	81.6481
1440	Irvine et al., 2014	Balaenoptera musculus	Northeast Pacific	1999CA-ST15-23038	36373	14.3697	53.721	82.01
1441	Irvine et al., 2014	Balaenoptera musculus	Northeast Pacific	1999CA-ST15-23038	36374	14.3431	54.0833	82.322
1442	Irvine et al., 2014	Balaenoptera musculus	Northeast Pacific	1999CA-ST15-23038	36375.5	14.4172	54.277	82.6627
1443	Irvine et al., 2014	Balaenoptera musculus	Northeast Pacific	1999CA-ST15-23038	36376.2	14.5265	54.4484	83.0519
1444	Irvine et al., 2014	Balaenoptera musculus	Northeast Pacific	1999CA-ST15-23038	36377.2	14.3178	55.0778	83.2702
1445	Irvine et al., 2014	Balaenoptera musculus	Northeast Pacific	1999CA-ST15-23038	36378.1	14.3912	55.3774	83.7202
1446	Irvine et al., 2014	Balaenoptera musculus	Northeast Pacific	1999CA-ST15-23038	36379	14.3232	55.89	84.1044
1447	Irvine et al., 2014	Balaenoptera musculus	Northeast Pacific	1999CA-ST15-23038	36380.2	14.2675	56.3294	84.4361
1448	Irvine et al., 2014	Balaenoptera musculus	Northeast Pacific	1999CA-ST15-23038	36381.2	13.8518	57.2692	84.5569
1449	Irvine et al., 2014	Balaenoptera musculus	Northeast Pacific	1999CA-ST15-23038	36382	13.7694	57.8771	85.013
1450	Irvine et al., 2014	Balaenoptera musculus	Northeast Pacific	1999CA-ST15-23038	36383	13.5906	58.5119	85.2987
1451	Irvine et al., 2014	Balaenoptera musculus	Northeast Pacific	1999CA-ST15-23038	36384.7	12.8919	59.7318	85.135
1452	Irvine et al., 2014	Balaenoptera musculus	Northeast Pacific	1999CA-ST15-23038	36385.2	12.5234	60.3859	85.0481
1453	Irvine et al., 2014	Balaenoptera musculus	Northeast Pacific	1999CA-ST15-23038	36386.2	12.6238	60.5967	85.4572
1454	Irvine et al., 2014	Balaenoptera musculus	Northeast Pacific	1999CA-ST15-23038	36387.2	12.9164	60.6606	86.1067
1455	Irvine et al., 2014	Balaenoptera musculus	Northeast Pacific	1999CA-ST15-23038	36388.5	12.5856	61.2468	86.0236
1456	Irvine et al., 2014	Balaenoptera musculus	Northeast Pacific	1999CA-ST15-23038	36389.7	13.1765	60.9562	86.9101
1457	Irvine et al., 2014	Balaenoptera musculus	Northeast Pacific	1999CA-ST15-23038	36390	13.1443	61.3785	87.2697
1458	Irvine et al., 2014	Balaenoptera musculus	Northeast Pacific	1999CA-ST15-23038	36391.1	13.565	61.3564	88.0912
1459	Irvine et al., 2014	Balaenoptera musculus	Northeast Pacific	1999CA-ST15-23038	36392	14.0768	61.1873	88.9429
1460	Irvine et al., 2014	Balaenoptera musculus	Northeast Pacific	1999CA-ST15-23038	36393.5	13.7121	61.9345	88.9608
1461	Irvine et al., 2014	Balaenoptera musculus	Northeast Pacific	1999CA-ST15-23038	36394.2	14.0894	61.9674	89.7506
1462	Irvine et al., 2014	Balaenoptera musculus	Northeast Pacific	1999CA-ST15-23038	36395.2	13.9332	62.5	89.9699
1463	Irvine et al., 2014	Balaenoptera musculus	Northeast Pacific	1999CA-ST15-23038	36396.1	13.9675	62.9184	90.4625
1464	Irvine et al., 2014	Balaenoptera musculus	Northeast Pacific	1999CA-ST15-23038	36397	13.5233	63.6878	90.3371
1465	Irvine et al., 2014	Balaenoptera musculus	Northeast Pacific	1999CA-ST15-23038	36398.2	13.3567	64.3234	90.6465
1466	Irvine et al., 2014	Balaenoptera musculus	Northeast Pacific	1999CA-ST15-23038	36399.2	13.8329	64.2169	91.4893
1467	Irvine et al., 2014	Balaenoptera musculus	Northeast Pacific	1999CA-ST15-23038	36400.1	14.0867	64.4039	92.1878
1468	Irvine et al., 2014	Balaenoptera musculus	Northeast Pacific	1999CA-ST15-23038	36401.5	14.1045	64.7443	92.5586
1469	Irvine et al., 2014	Balaenoptera musculus	Northeast Pacific	1999CA-ST15-23038	36402.2	14.2391	64.9717	93.0498
1470	Irvine et al., 2014	Balaenoptera musculus	Northeast Pacific	1999CA-ST15-23038	36403.2	14.1742	65.4692	93.4196
1471	Irvine et al., 2014	Balaenoptera musculus	Northeast Pacific	1999CA-ST15-23038	36404.1	14.2073	65.8513	93.8679
1472	Irvine et al., 2014	Balaenoptera musculus	Northeast Pacific	1999CA-ST15-23038	36405.1	14.2622	66.2063	94.3315
1473	Irvine et al., 2014	Balaenoptera musculus	Northeast Pacific	1999CA-ST15-23038	36406	14.2158	66.6755	94.7082
1474	Irvine et al., 2014	Balaenoptera musculus	Northeast Pacific	1999CA-ST15-23043	36363.7	14.1781	51.1359	79.0229
1475	Irvine et al., 2014	Balaenoptera musculus	Northeast Pacific	1999CA-ST15-23043	36364.1	14.182	51.3863	79.2836
1476	Irvine et al., 2014	Balaenoptera musculus	Northeast Pacific	1999CA-ST15-23043	36365.1	14.0745	51.6976	79.3797
1477	Irvine et al., 2014	Balaenoptera musculus	Northeast Pacific	1999CA-ST15-23043	36366.5	14.0396	52.0686	79.6865
1478	Irvine et al., 2014	Balaenoptera musculus	Northeast Pacific	1999CA-ST15-23043	36367.2	14.0773	52.3405	80.0377
1479	Irvine et al., 2014	Balaenoptera musculus	Northeast Pacific	1999CA-ST15-23043	36368.2	13.8605	52.8402	80.1061
1480	Irvine et al., 2014	Balaenoptera musculus	Northeast Pacific	1999CA-ST15-23043	36369.2	14.1745	52.8304	80.7275
1481	Irvine et al., 2014	Balaenoptera musculus	Northeast Pacific	1999CA-ST15-23043	36370.7	14.1799	53.1535	81.0653
1482	Irvine et al., 2014	Balaenoptera musculus	Northeast Pacific	1999CA-ST15-23043	36371.2	14.1847	53.3428	81.2609
1483	Irvine et al., 2014	Balaenoptera musculus	Northeast Pacific	1999CA-ST15-23043	36372.2	14.341	53.4622	81.6934
1484	Irvine et al., 2014	Balaenoptera musculus	Northeast Pacific	1999CA-ST15-23043	36373.1	14.4018	53.7113	82.0657
1485	Irvine et al., 2014	Balaenoptera musculus	Northeast Pacific	1999CA-ST15-23043	36374	14.1856	54.3472	82.2767
1486	Irvine et al., 2014	Balaenoptera musculus	Northeast Pacific	1999CA-ST15-23043	36375.5	14.186	54.6797	82.6124
1487	Irvine et al., 2014	Balaenoptera musculus	Northeast Pacific	1999CA-ST15-23043	36376.2	14.1725	55.0447	82.9535
1488	Irvine et al., 2014	Balaenoptera musculus	Northeast Pacific	1999CA-ST15-23043	36377.2	14.1733	55.384	83.2968
1489	Irvine et al., 2014	Balaenoptera musculus	Northeast Pacific	1999CA-ST15-23043	36378.1	14.182	55.6839	83.614
1490	Irvine et al., 2014	Balaenoptera musculus	Northeast Pacific	1999CA-ST15-23043	36379	14.1804	56.0349	83.9639
1491	Irvine et al., 2014	Balaenoptera musculus	Northeast Pacific	1999CA-ST15-23043	36380.7	13.7704	56.8411	83.9546
1492	Irvine et al., 2014	Balaenoptera musculus	Northeast Pacific	1999CA-ST15-23043	36381.2	14.0464	56.8954	84.5613
1493	Irvine et al., 2014	Balaenoptera musculus	Northeast Pacific	1999CA-ST15-23043	36382	14.1671	57.13	85.0386
1494	Irvine et al., 2014	Balaenoptera musculus	Northeast Pacific	1999CA-ST15-23043	36383	14.1069	57.5633	85.3539
1495	Irvine et al., 2014	Balaenoptera musculus	Northeast Pacific	1999CA-ST15-23043	36384.5	14.1737	57.8589	85.7842
1496	Irvine et al., 2014	Balaenoptera musculus	Northeast Pacific	1999CA-ST15-23043	36385.2	13.4355	59.0364	85.4917
1497	Irvine et al., 2014	Balaenoptera musculus	Northeast Pacific	1999CA-ST15-23043	36386.2	14.1913	58.5731	86.5357
1498	Irvine et al., 2014	Balaenoptera musculus	Northeast Pacific	1999CA-ST15-23043	36387.1	14.1885	58.9622	86.9211
1499	Irvine et al., 2014	Balaenoptera musculus	Northeast Pacific	1999CA-ST15-23043	36388	14.1719	59.3878	87.3168
1500	Irvine et al., 2014	Balaenoptera musculus	Northeast Pacific	1999CA-ST15-23043	36389.2	13.9846	59.94	87.4943
1501	Irvine et al., 2014	Balaenoptera musculus	Northeast Pacific	1999CA-ST15-23043	36390	14.1914	60.1047	88.0725
1502	Irvine et al., 2014	Balaenoptera musculus	Northeast Pacific	1999CA-ST15-23043	36391	14.1201	60.561	88.387
1503	Irvine et al., 2014	Balaenoptera musculus	Northeast Pacific	1999CA-ST15-23043	36392	14.103	61.014	88.8102
1504	Irvine et al., 2014	Balaenoptera musculus	Northeast Pacific	1999CA-ST15-23043	36393.2	13.9746	61.5356	89.0759
1505	Irvine et al., 2014	Balaenoptera musculus	Northeast Pacific	1999CA-ST15-23043	36394.2	14.1571	61.7143	89.6173
1506	Irvine et al., 2014	Balaenoptera musculus	Northeast Pacific	1999CA-ST15-23043	36395.2	14.1798	62.1191	90.0705
1507	Irvine et al., 2014	Balaenoptera musculus	Northeast Pacific	1999CA-ST15-23043	36396.1	14.3311	62.359	90.6125
1508	Irvine et al., 2014	Balaenoptera musculus	Northeast Pacific	1999CA-ST15-23043	36397	14.2372	62.8754	90.9433
1509	Irvine et al., 2014	Balaenoptera musculus	Northeast Pacific	1999CA-ST15-23043	36398.2	14.1904	63.2937	91.2654
1510	Irvine et al., 2014	Balaenoptera musculus	Northeast Pacific	1999CA-ST15-23043	36399.2	14.2228	63.7365	91.7797
1511	Irvine et al., 2014	Balaenoptera musculus	Northeast Pacific	1999CA-ST15-23043	36400	14.5183	63.6869	92.3055
1512	Irvine et al., 2014	Balaenoptera musculus	Northeast Pacific	1999CA-ST15-23043	36401	14.5566	64.0918	92.7896
1513	Irvine et al., 2014	Balaenoptera musculus	Northeast Pacific	1999CA-ST15-23043	36402.6	14.622	64.4043	93.2289
1514	Irvine et al., 2014	Balaenoptera musculus	Northeast Pacific	1999CA-ST15-23043	36403.2	14.6265	64.769	93.5974
1515	Irvine et al., 2014	Balaenoptera musculus	Northeast Pacific	1999CA-ST15-23043	36404.2	15.3066	64.325	94.494
1516	Irvine et al., 2014	Balaenoptera musculus	Northeast Pacific	1999CA-ST15-23043	36405.5	15.7454	64.1125	95.1387
1517	Irvine et al., 2014	Balaenoptera musculus	Northeast Pacific	1999CA-ST15-23043	36406.6	15.4946	64.9041	95.438
1518	Irvine et al., 2014	Balaenoptera musculus	Northeast Pacific	1999CA-ST15-23043	36407.5	15.5357	65.2907	95.9052
1519	Irvine et al., 2014	Balaenoptera musculus	Northeast Pacific	1999CA-ST15-23043	36408	15.2184	66.1641	96.1562
1520	Irvine et al., 2014	Balaenoptera musculus	Northeast Pacific	1999CA-ST15-23043	36409.2	14.8339	67.1035	96.3403
1521	Irvine et al., 2014	Balaenoptera musculus	Northeast Pacific	1999CA-ST15-23043	36410.2	14.9257	67.4186	96.8342
1522	Irvine et al., 2014	Balaenoptera musculus	Northeast Pacific	1999CA-ST15-23043	36411.6	14.649	68.26	97.1397
1523	Irvine et al., 2014	Balaenoptera musculus	Northeast Pacific	1999CA-ST15-23043	36412.1	14.5725	68.814	97.5468
1524	Irvine et al., 2014	Balaenoptera musculus	Northeast Pacific	1999CA-ST15-23043	36413.2	14.5571	69.2757	97.979
1525	Irvine et al., 2014	Balaenoptera musculus	Northeast Pacific	1999CA-ST15-23043	36414.7	14.4602	69.831	98.3438
1526	Irvine et al., 2014	Balaenoptera musculus	Northeast Pacific	1999CA-ST15-23043	36416	14.3917	70.3485	98.7263
1527	Irvine et al., 2014	Balaenoptera musculus	Northeast Pacific	1999CA-ST15-23043	36416.2	14.1972	71.0055	98.999
1528	Irvine et al., 2014	Balaenoptera musculus	Northeast Pacific	1999CA-ST15-23043	36417	14.2755	71.3603	99.5087
1529	Irvine et al., 2014	Balaenoptera musculus	Northeast Pacific	1999CA-ST15-23043	36418.1	14.1624	71.9362	99.8641
1530	Irvine et al., 2014	Balaenoptera musculus	Northeast Pacific	1999CA-ST15-23043	36419.5	14.5692	71.9211	100.647
1531	Irvine et al., 2014	Balaenoptera musculus	Northeast Pacific	1999CA-ST15-23043	36420.1	14.3368	72.6018	100.864
1532	Irvine et al., 2014	Balaenoptera musculus	Northeast Pacific	1999CA-ST15-23043	36421.2	14.5923	72.779	101.546
1533	Irvine et al., 2014	Balaenoptera musculus	Northeast Pacific	1999CA-ST15-23043	36422.2	14.7472	73.0629	102.134
1534	Irvine et al., 2014	Balaenoptera musculus	Northeast Pacific	1999CA-ST15-23043	36423.1	14.8418	73.4139	102.67
1535	Irvine et al., 2014	Balaenoptera musculus	Northeast Pacific	1999CA-ST15-23043	36424.1	15.197	73.4895	103.439
1536	Irvine et al., 2014	Balaenoptera musculus	Northeast Pacific	1999CA-ST15-23043	36425.2	15.5161	73.621	104.198
1537	Irvine et al., 2014	Balaenoptera musculus	Northeast Pacific	1999CA-ST15-23043	36426	15.6583	73.9435	104.8
1538	Irvine et al., 2014	Balaenoptera musculus	Northeast Pacific	1999CA-ST15-23043	36427.2	15.7008	74.3704	105.311
1539	Irvine et al., 2014	Balaenoptera musculus	Northeast Pacific	1999CA-ST15-23043	36428.5	15.4861	75.0553	105.571
1540	Irvine et al., 2014	Balaenoptera musculus	Northeast Pacific	1999CA-ST15-23043	36429.5	15.4703	75.5375	106.024
1541	Irvine et al., 2014	Balaenoptera musculus	Northeast Pacific	1999CA-ST15-23043	36430.2	15.4684	76.007	106.488
1542	Irvine et al., 2014	Balaenoptera musculus	Northeast Pacific	1999CA-ST15-23043	36431.2	15.423	76.5183	106.909
1543	Irvine et al., 2014	Balaenoptera musculus	Northeast Pacific	1999CA-ST15-23043	36432.1	15.4517	76.9531	107.403
1544	Irvine et al., 2014	Balaenoptera musculus	Northeast Pacific	1999CA-ST15-23043	36433.2	15.4473	77.4253	107.865
1545	Irvine et al., 2014	Balaenoptera musculus	Northeast Pacific	1999CA-ST15-23043	36434.2	15.4385	77.9002	108.322
1546	Irvine et al., 2014	Balaenoptera musculus	Northeast Pacific	1999CA-ST15-23043	36435	15.449	78.3632	108.802
1547	Irvine et al., 2014	Balaenoptera musculus	Northeast Pacific	1999CA-ST15-23043	36436.2	15.3742	78.8751	109.172
1548	Irvine et al., 2014	Balaenoptera musculus	Northeast Pacific	1999CA-ST15-23043	36437.5	15.4645	79.2775	109.747
1549	Irvine et al., 2014	Balaenoptera musculus	Northeast Pacific	1999CA-ST15-23043	36438.5	15.4603	79.746	110.206
1550	Irvine et al., 2014	Balaenoptera musculus	Northeast Pacific	1999CA-ST15-23043	36439.2	15.4707	80.2058	110.685
1551	Irvine et al., 2014	Balaenoptera musculus	Northeast Pacific	1999CA-ST15-23043	36440.2	15.4076	80.7173	111.073
1552	Irvine et al., 2014	Balaenoptera musculus	Northeast Pacific	1999CA-ST15-23043	36441.2	15.4771	81.1344	111.624
1553	Irvine et al., 2014	Balaenoptera musculus	Northeast Pacific	1999CA-ST15-23043	36442.2	15.4589	81.5977	112.052
1554	Irvine et al., 2014	Balaenoptera musculus	Northeast Pacific	1999CA-ST15-23043	36443	15.4456	82.0715	112.499
1555	Irvine et al., 2014	Balaenoptera musculus	Northeast Pacific	1999CA-ST15-23043	36444	15.3918	82.5743	112.894
1556	Irvine et al., 2014	Balaenoptera musculus	Northeast Pacific	1999CA-ST15-23043	36445.1	15.4502	82.9905	113.424
1557	Irvine et al., 2014	Balaenoptera musculus	Northeast Pacific	1999CA-ST15-23043	36447	15.5169	83.4228	113.984
1558	Irvine et al., 2014	Balaenoptera musculus	Northeast Pacific	1999CA-ST15-23043	36447.5	15.4572	83.8993	114.345
1559	Irvine et al., 2014	Balaenoptera musculus	Northeast Pacific	1999CA-ST15-23043	36448.5	15.4651	84.3247	114.787
1560	Irvine et al., 2014	Balaenoptera musculus	Northeast Pacific	1999CA-ST15-23043	36449.2	15.4629	84.7976	115.253
1561	Irvine et al., 2014	Balaenoptera musculus	Northeast Pacific	1999CA-ST15-23043	36450.1	15.4604	85.2758	115.722
1562	Irvine et al., 2014	Balaenoptera musculus	Northeast Pacific	1999CA-ST15-23043	36452	15.207	85.8785	115.827
1563	Irvine et al., 2014	Balaenoptera musculus	Northeast Pacific	1999CA-ST15-23043	36452	15.2555	86.2663	116.311
1564	Irvine et al., 2014	Balaenoptera musculus	Northeast Pacific	1999CA-ST15-23043	36453.2	14.6959	87.0851	116.028
1565	Irvine et al., 2014	Balaenoptera musculus	Northeast Pacific	1999CA-ST15-23043	36454.5	14.5015	87.5992	116.163
1566	Irvine et al., 2014	Balaenoptera musculus	Northeast Pacific	1999CA-ST15-23043	36455.5	14.3143	88.1078	116.307
1567	Irvine et al., 2014	Balaenoptera musculus	Northeast Pacific	1999CA-ST15-23043	36456.5	13.875	88.8335	116.166
1568	Irvine et al., 2014	Balaenoptera musculus	Northeast Pacific	1999CA-ST15-23043	36457.2	13.1582	89.9263	115.828
1569	Irvine et al., 2014	Balaenoptera musculus	Northeast Pacific	1999CA-ST15-23043	36458.2	13.4534	89.9907	116.486
1570	Irvine et al., 2014	Balaenoptera musculus	Northeast Pacific	1999CA-ST15-23043	36459	13.4087	90.3829	116.793
1571	Irvine et al., 2014	Balaenoptera musculus	Northeast Pacific	1999CA-ST15-23043	36460.6	13.1456	90.8963	116.794
1572	Irvine et al., 2014	Balaenoptera musculus	Northeast Pacific	1999CA-ST15-23043	36461	13.3585	91.0195	117.348
1573	Irvine et al., 2014	Balaenoptera musculus	Northeast Pacific	1999CA-ST15-23043	36462.5	12.6961	91.8438	116.869
1574	Irvine et al., 2014	Balaenoptera musculus	Northeast Pacific	1999CA-ST15-23043	36463.1	12.2438	92.5705	116.701
1575	Irvine et al., 2014	Balaenoptera musculus	Northeast Pacific	1999CA-ST15-23043	36465.2	12.0553	93.4192	117.179
1576	Irvine et al., 2014	Balaenoptera musculus	Northeast Pacific	1999CA-ST15-23043	36466.2	11.7076	94.049	117.121
1577	Irvine et al., 2014	Balaenoptera musculus	Northeast Pacific	1999CA-ST15-23043	36467.6	11.879	94.1947	117.613
1578	Irvine et al., 2014	Balaenoptera musculus	Northeast Pacific	1999CA-ST15-23043	36468.1	11.5209	94.7904	117.503
1579	Irvine et al., 2014	Balaenoptera musculus	Northeast Pacific	1999CA-ST15-23043	36470.2	11.457	95.4763	118.066
1580	Irvine et al., 2014	Balaenoptera musculus	Northeast Pacific	1999CA-ST15-23043	36471.5	10.7429	96.3114	117.496
1581	Irvine et al., 2014	Balaenoptera musculus	Northeast Pacific	1999CA-ST15-23043	36472.2	10.8464	96.4889	117.885
1582	Irvine et al., 2014	Balaenoptera musculus	Northeast Pacific	1999CA-ST15-23043	36473.2	10.3623	97.1058	117.555
1583	Irvine et al., 2014	Balaenoptera musculus	Northeast Pacific	1999CA-ST15-23043	36474.5	10.0418	97.6301	117.451
1584	Irvine et al., 2014	Balaenoptera musculus	Northeast Pacific	1999CA-ST15-23043	36475.5	9.70176	98.1952	117.345
1585	Irvine et al., 2014	Balaenoptera musculus	Northeast Pacific	1999CA-ST15-23043	36476.5	9.64925	98.5264	117.574
1586	Irvine et al., 2014	Balaenoptera musculus	Northeast Pacific	1999CA-ST15-23043	36477.7	9.42868	99.0566	117.66
1587	Irvine et al., 2014	Balaenoptera musculus	Northeast Pacific	1999CA-ST15-23043	36479.2	9.04543	100.108	117.933
1588	Irvine et al., 2014	Balaenoptera musculus	Northeast Pacific	1999CA-ST15-23043	36480.2	9.18312	100.19	118.297
1589	Irvine et al., 2014	Balaenoptera musculus	Northeast Pacific	1999CA-ST15-23043	36482.5	9.13689	100.761	118.776
1590	Irvine et al., 2014	Balaenoptera musculus	Northeast Pacific	1999CA-ST15-23043	36484.5	9.07354	101.462	119.336
1591	Irvine et al., 2014	Balaenoptera musculus	Northeast Pacific	1999CA-ST15-23043	36486.7	9.40406	101.61	120.145
1592	Irvine et al., 2014	Balaenoptera musculus	Northeast Pacific	1999CA-ST15-23043	36490.1	9.81918	101.968	121.346
1593	Irvine et al., 2014	Balaenoptera musculus	Northeast Pacific	1999CA-ST15-23043	36492.5	10.1826	102.123	122.215
1594	Irvine et al., 2014	Balaenoptera musculus	Northeast Pacific	1999CA-ST15-23043	36493.2	10.2732	102.26	122.528
1595	Irvine et al., 2014	Balaenoptera musculus	Northeast Pacific	1999CA-ST15-23043	36494.2	10.5096	102.21	122.95
1596	Irvine et al., 2014	Balaenoptera musculus	Northeast Pacific	1999CA-ST15-23043	36496.2	10.6411	102.577	123.563
1597	Irvine et al., 2014	Balaenoptera musculus	Northeast Pacific	1999CA-ST15-23043	36497.2	10.7196	102.674	123.814
1598	Irvine et al., 2014	Balaenoptera musculus	Northeast Pacific	1999CA-ST15-23043	36498.2	10.8923	102.665	124.148
1599	Irvine et al., 2014	Balaenoptera musculus	Northeast Pacific	1999CA-ST15-23043	36499.1	10.7664	103.014	124.236
1600	Irvine et al., 2014	Balaenoptera musculus	Northeast Pacific	1999CA-ST15-23043	36502.2	11.1861	103.307	125.334
1601	Irvine et al., 2014	Balaenoptera musculus	Northeast Pacific	1999CA-ST15-23043	36503.2	11.3987	103.295	125.737
1602	Irvine et al., 2014	Balaenoptera musculus	Northeast Pacific	1999CA-ST15-23043	36504.7	11.7113	103.186	126.244
1603	Irvine et al., 2014	Balaenoptera musculus	Northeast Pacific	1999CA-ST15-23043	36505	11.5667	103.463	126.227
1604	Irvine et al., 2014	Balaenoptera musculus	Northeast Pacific	1999CA-ST15-23043	36507	11.5937	103.44	126.264
1605	Irvine et al., 2014	Balaenoptera musculus	Northeast Pacific	1999CA-ST15-23043	36507.5	11.4941	103.587	126.213
1606	Irvine et al., 2014	Balaenoptera musculus	Northeast Pacific	1999CA-ST15-23043	36508.1	11.3748	103.705	126.096
1607	Irvine et al., 2014	Balaenoptera musculus	Northeast Pacific	1999CA-ST15-23043	36509.5	11.2706	103.726	125.92
1608	Irvine et al., 2014	Balaenoptera musculus	Northeast Pacific	1999CA-ST15-23043	36510.2	11.1496	103.843	125.798
1609	Irvine et al., 2014	Balaenoptera musculus	Northeast Pacific	1999CA-ST15-23043	36511.7	11.0367	103.847	125.59
1610	Irvine et al., 2014	Balaenoptera musculus	Northeast Pacific	2000CA-ST15-00826	36805	15.3692	80.6507	110.928
1611	Irvine et al., 2014	Balaenoptera musculus	Northeast Pacific	2000CA-ST15-00826	36806.1	15.372	81.1151	111.396
1612	Irvine et al., 2014	Balaenoptera musculus	Northeast Pacific	2000CA-ST15-00826	36807.7	15.474	81.5184	111.996
1613	Irvine et al., 2014	Balaenoptera musculus	Northeast Pacific	2000CA-ST15-00826	36808.5	15.5301	81.9328	112.521
1614	Irvine et al., 2014	Balaenoptera musculus	Northeast Pacific	2000CA-ST15-00826	36809.1	15.5393	82.398	113.002
1615	Irvine et al., 2014	Balaenoptera musculus	Northeast Pacific	2000CA-ST15-00826	36810.1	15.4624	82.9174	113.369
1616	Irvine et al., 2014	Balaenoptera musculus	Northeast Pacific	2000CA-ST15-00827	36803.9	15.3695	79.722	110.002
1617	Irvine et al., 2014	Balaenoptera musculus	Northeast Pacific	2000CA-ST15-00827	36804.1	15.4088	80.1635	110.518
1618	Irvine et al., 2014	Balaenoptera musculus	Northeast Pacific	2000CA-ST15-00827	36805.1	15.381	80.6462	110.946
1619	Irvine et al., 2014	Balaenoptera musculus	Northeast Pacific	2000CA-ST15-00827	36806.1	15.3779	81.1128	111.405
1620	Irvine et al., 2014	Balaenoptera musculus	Northeast Pacific	2000CA-ST15-01386	36805	15.3692	80.1864	110.465
1621	Irvine et al., 2014	Balaenoptera musculus	Northeast Pacific	2000CA-ST15-01386	36805.1	15.371	80.6431	110.925
1622	Irvine et al., 2014	Balaenoptera musculus	Northeast Pacific	2000CA-ST15-01386	36806.1	15.3615	81.099	111.364
1623	Irvine et al., 2014	Balaenoptera musculus	Northeast Pacific	2000CA-ST15-01386	36807.6	15.2436	81.6787	111.707
1624	Irvine et al., 2014	Balaenoptera musculus	Northeast Pacific	2000CA-ST15-01386	36808.5	15.5728	81.8326	112.514
1625	Irvine et al., 2014	Balaenoptera musculus	Northeast Pacific	2000CA-ST15-01386	36809.1	15.423	82.4189	112.803
1626	Irvine et al., 2014	Balaenoptera musculus	Northeast Pacific	2000CA-ST15-01386	36810.1	15.3868	82.9257	113.235
1627	Irvine et al., 2014	Balaenoptera musculus	Northeast Pacific	2000CA-ST15-01386	36811.1	15.3534	83.4251	113.666
1628	Irvine et al., 2014	Balaenoptera musculus	Northeast Pacific	2000CA-ST15-01386	36812.7	15.371	83.8821	114.155
1629	Irvine et al., 2014	Balaenoptera musculus	Northeast Pacific	2000CA-ST15-01386	36813.6	15.4931	84.2768	114.786
1630	Irvine et al., 2014	Balaenoptera musculus	Northeast Pacific	2000CA-ST15-01386	36817.1	16.5224	85.5127	118.036
1631	Irvine et al., 2014	Balaenoptera musculus	Northeast Pacific	2000CA-ST15-01386	36818.1	16.6011	85.9052	118.584
1632	Irvine et al., 2014	Balaenoptera musculus	Northeast Pacific	2000CA-ST15-01386	36819.6	16.6894	86.404	119.249
1633	Irvine et al., 2014	Balaenoptera musculus	Northeast Pacific	2000CA-ST15-01386	36820.1	16.7165	86.9035	119.797
1634	Irvine et al., 2014	Balaenoptera musculus	Northeast Pacific	2000CA-ST15-01386	36821.5	16.3903	87.5198	119.772
1635	Irvine et al., 2014	Balaenoptera musculus	Northeast Pacific	2000CA-ST15-01386	36822.6	16.3347	87.997	120.139
1636	Irvine et al., 2014	Balaenoptera musculus	Northeast Pacific	2000CA-ST15-01386	36823.1	16.3334	88.4465	120.585
1637	Irvine et al., 2014	Balaenoptera musculus	Northeast Pacific	2000CA-ST15-01386	36824.1	16.3181	88.9208	121.027
1638	Irvine et al., 2014	Balaenoptera musculus	Northeast Pacific	2000CA-ST15-01386	36825.5	16.5525	89.2068	121.776
1639	Irvine et al., 2014	Balaenoptera musculus	Northeast Pacific	2000CA-ST15-01386	36826.1	16.7238	89.6633	122.562
1640	Irvine et al., 2014	Balaenoptera musculus	Northeast Pacific	2000CA-ST15-01386	36827.1	17.1038	89.9465	123.592
1641	Irvine et al., 2014	Balaenoptera musculus	Northeast Pacific	2000CA-ST15-01386	36828.1	17.1624	90.3903	124.149
1642	Irvine et al., 2014	Balaenoptera musculus	Northeast Pacific	2000CA-ST15-01386	36829.1	17.0988	90.8806	124.512
1643	Irvine et al., 2014	Balaenoptera musculus	Northeast Pacific	2000CA-ST15-01386	36830.1	17.024	91.3407	124.823
1644	Irvine et al., 2014	Balaenoptera musculus	Northeast Pacific	2000CA-ST15-01386	36832.1	16.329	92.3492	124.467
1645	Irvine et al., 2014	Balaenoptera musculus	Northeast Pacific	2000CA-ST15-01386	36833.1	15.9162	92.9554	124.258
1646	Irvine et al., 2014	Balaenoptera musculus	Northeast Pacific	2000CA-ST15-01386	36834.1	15.5218	93.4699	123.997
1647	Irvine et al., 2014	Balaenoptera musculus	Northeast Pacific	2000CA-ST15-01386	36835.6	15.5623	93.8627	124.468
1648	Irvine et al., 2014	Balaenoptera musculus	Northeast Pacific	2000CA-ST15-01386	36836.1	15.577	94.2502	124.882
1649	Irvine et al., 2014	Balaenoptera musculus	Northeast Pacific	2000CA-ST15-01386	36837.1	15.4796	94.6876	125.126
1650	Irvine et al., 2014	Balaenoptera musculus	Northeast Pacific	2000CA-ST15-01386	36838.5	15.4802	95.073	125.51
1651	Irvine et al., 2014	Balaenoptera musculus	Northeast Pacific	2000CA-ST15-01386	36840.1	15.5963	95.7618	126.425
1652	Irvine et al., 2014	Balaenoptera musculus	Northeast Pacific	2000CA-ST15-01386	36841.1	15.5377	96.1576	126.703
1653	Irvine et al., 2014	Balaenoptera musculus	Northeast Pacific	2000CA-ST15-01386	36842.1	15.4348	96.5908	126.93
1654	Irvine et al., 2014	Balaenoptera musculus	Northeast Pacific	2000CA-ST15-01386	36843.7	15.4231	96.965	127.278
1655	Irvine et al., 2014	Balaenoptera musculus	Northeast Pacific	2000CA-ST15-01386	36845.1	15.6513	97.6266	128.383
1656	Irvine et al., 2014	Balaenoptera musculus	Northeast Pacific	2000CA-ST15-01386	36847	15.4936	97.9865	128.432
1657	Irvine et al., 2014	Balaenoptera musculus	Northeast Pacific	2000CA-ST15-01386	36847.7	15.4102	98.3076	128.588
1658	Irvine et al., 2014	Balaenoptera musculus	Northeast Pacific	2000CA-ST15-01386	36849	15.3846	98.5558	128.788
1659	Irvine et al., 2014	Balaenoptera musculus	Northeast Pacific	2000CA-ST15-01386	36850	14.8785	99.1728	128.4
1660	Irvine et al., 2014	Balaenoptera musculus	Northeast Pacific	2000CA-ST15-01386	36850.1	14.8499	99.4738	128.643
1661	Irvine et al., 2014	Balaenoptera musculus	Northeast Pacific	2000CA-ST15-01386	36853.6	13.6995	100.363	127.282
1662	Irvine et al., 2014	Balaenoptera musculus	Northeast Pacific	2000CA-ST15-01386	36854.1	13.4415	100.72	127.13
1663	Irvine et al., 2014	Balaenoptera musculus	Northeast Pacific	2000CA-ST15-01386	36855.5	12.8939	101.142	126.476
1664	Irvine et al., 2014	Balaenoptera musculus	Northeast Pacific	2000CA-ST15-01386	36857.5	12.4426	101.595	126.053
1665	Irvine et al., 2014	Balaenoptera musculus	Northeast Pacific	2000CA-ST15-01386	36859.1	11.9571	102.248	125.749
1666	Irvine et al., 2014	Balaenoptera musculus	Northeast Pacific	2000CA-ST15-01386	36861.5	11.731	102.673	125.73
1667	Irvine et al., 2014	Balaenoptera musculus	Northeast Pacific	2000CA-ST15-01386	36864.1	11.2931	103.364	125.558
1668	Irvine et al., 2014	Balaenoptera musculus	Northeast Pacific	2000CA-ST15-01386	36865.5	11.0821	103.683	125.457
1669	Irvine et al., 2014	Balaenoptera musculus	Northeast Pacific	2000CA-ST15-01386	36866.5	10.9771	103.854	125.421
1670	Irvine et al., 2014	Balaenoptera musculus	Northeast Pacific	2000CA-ST15-01386	36868.5	10.6969	104.315	125.323
1671	Irvine et al., 2014	Balaenoptera musculus	Northeast Pacific	2000CA-ST15-01386	36869.5	10.6579	104.402	125.335
1672	Irvine et al., 2014	Balaenoptera musculus	Northeast Pacific	2000CA-ST15-01386	36870.5	10.5699	104.589	125.344
1673	Irvine et al., 2014	Balaenoptera musculus	Northeast Pacific	2000CA-ST15-01386	36871.1	10.5157	104.729	125.374
1674	Irvine et al., 2014	Balaenoptera musculus	Northeast Pacific	2000CA-ST15-01386	36873	10.5825	104.804	125.576
1675	Irvine et al., 2014	Balaenoptera musculus	Northeast Pacific	2000CA-ST15-01386	36874	10.3079	105.024	125.255
1676	Irvine et al., 2014	Balaenoptera musculus	Northeast Pacific	2000CA-ST15-01386	36874.5	10.3075	105.104	125.331
1677	Irvine et al., 2014	Balaenoptera musculus	Northeast Pacific	2000CA-ST15-01386	36875.1	10.4087	105.043	125.471
1678	Irvine et al., 2014	Balaenoptera musculus	Northeast Pacific	2000CA-ST15-01386	36876.1	10.3392	105.17	125.456
1679	Irvine et al., 2014	Balaenoptera musculus	Northeast Pacific	2000CA-ST15-01386	36877.1	10.3066	105.255	125.472
1680	Irvine et al., 2014	Balaenoptera musculus	Northeast Pacific	2000CA-ST15-01386	36878.5	10.2205	105.366	125.409
1681	Irvine et al., 2014	Balaenoptera musculus	Northeast Pacific	2000CA-ST15-01386	36879.5	10.2016	105.394	125.397
1682	Irvine et al., 2014	Balaenoptera musculus	Northeast Pacific	2000CA-ST15-01386	36880.1	10.1924	105.42	125.402
1683	Irvine et al., 2014	Balaenoptera musculus	Northeast Pacific	2000CA-ST15-01386	36881.1	10.1828	105.42	125.381
1684	Irvine et al., 2014	Balaenoptera musculus	Northeast Pacific	2000CA-ST15-01386	36883	10.1986	105.442	125.428
1685	Irvine et al., 2014	Balaenoptera musculus	Northeast Pacific	2000CA-ST15-01386	36883.7	10.3144	105.525	125.722
1686	Irvine et al., 2014	Balaenoptera musculus	Northeast Pacific	2000CA-ST15-01386	36884.1	10.1219	105.446	125.275
1687	Irvine et al., 2014	Balaenoptera musculus	Northeast Pacific	2000CA-ST15-01386	36885.1	10.0794	105.45	125.192
1688	Irvine et al., 2014	Balaenoptera musculus	Northeast Pacific	2000CA-ST15-01386	36886.1	10.0455	105.481	125.148
1689	Irvine et al., 2014	Balaenoptera musculus	Northeast Pacific	2000CA-ST15-01386	36887.7	9.96291	105.451	124.955
1690	Irvine et al., 2014	Balaenoptera musculus	Northeast Pacific	2000CA-ST15-01386	36888.5	9.98183	105.384	124.921
1691	Irvine et al., 2014	Balaenoptera musculus	Northeast Pacific	2000CA-ST15-01386	36889.1	9.99925	105.306	124.875
1692	Irvine et al., 2014	Balaenoptera musculus	Northeast Pacific	2000CA-ST15-01386	36890.1	9.99916	105.186	124.754
1693	Irvine et al., 2014	Balaenoptera musculus	Northeast Pacific	2000CA-ST15-01386	36891.5	10.0004	105.196	124.756
1694	Irvine et al., 2014	Balaenoptera musculus	Northeast Pacific	2000CA-ST15-01386	36892.5	9.86005	105.238	124.514
1695	Irvine et al., 2014	Balaenoptera musculus	Northeast Pacific	2000CA-ST15-01386	36893.1	10.033	104.979	124.595
1696	Irvine et al., 2014	Balaenoptera musculus	Northeast Pacific	2000CA-ST15-01386	36894.1	10.0785	104.848	124.55
1697	Irvine et al., 2014	Balaenoptera musculus	Northeast Pacific	2000CA-ST15-01386	36895.1	10.1899	104.611	124.532
1698	Irvine et al., 2014	Balaenoptera musculus	Northeast Pacific	2000CA-ST15-01386	36897	9.78448	105.142	124.228
1699	Irvine et al., 2014	Balaenoptera musculus	Northeast Pacific	2000CA-ST15-01386	36897.6	10.3248	104.264	124.444
1700	Irvine et al., 2014	Balaenoptera musculus	Northeast Pacific	2000CA-ST15-01386	36898.1	10.0699	104.272	123.947
1701	Irvine et al., 2014	Balaenoptera musculus	Northeast Pacific	2000CA-ST15-01386	36899.1	10.0426	104.073	123.696
1702	Irvine et al., 2014	Balaenoptera musculus	Northeast Pacific	2000CA-ST15-01386	36901	9.80673	104.111	123.262
1703	Irvine et al., 2014	Balaenoptera musculus	Northeast Pacific	2000CA-ST15-01386	36901.6	9.5638	104.128	122.794
1704	Irvine et al., 2014	Balaenoptera musculus	Northeast Pacific	2000CA-ST15-01386	36902.6	9.70169	103.765	122.707
1705	Irvine et al., 2014	Balaenoptera musculus	Northeast Pacific	2000CA-ST15-01386	36904.5	9.16531	103.702	121.585
1706	Irvine et al., 2014	Balaenoptera musculus	Northeast Pacific	2000CA-ST15-01386	36905.7	8.92638	103.487	120.917
1707	Irvine et al., 2014	Balaenoptera musculus	Northeast Pacific	2000CA-ST15-01386	36907	8.72473	103.297	120.341
1708	Irvine et al., 2014	Balaenoptera musculus	Northeast Pacific	2000CA-ST15-01386	36907.1	8.30336	103.493	119.693
1709	Irvine et al., 2014	Balaenoptera musculus	Northeast Pacific	2000CA-ST15-01386	36911.1	7.79674	102.819	118.03
1710	Irvine et al., 2014	Balaenoptera musculus	Northeast Pacific	2000CA-ST15-01386	36913.5	7.24248	102.822	116.927
1711	Irvine et al., 2014	Balaenoptera musculus	Northeast Pacific	2000CA-ST15-01386	36914.7	6.86719	102.903	116.261
1712	Irvine et al., 2014	Balaenoptera musculus	Northeast Pacific	2000CA-ST15-01386	36915.5	6.71758	102.752	115.815
1713	Irvine et al., 2014	Balaenoptera musculus	Northeast Pacific	2000CA-ST15-01386	36918.5	6.40226	102.139	114.585
1714	Irvine et al., 2014	Balaenoptera musculus	Northeast Pacific	2000CA-ST15-01386	36920	6.5787	101.674	114.472
1715	Irvine et al., 2014	Balaenoptera musculus	Northeast Pacific	2000CA-ST15-01386	36920.1	6.53681	101.416	114.131
1716	Irvine et al., 2014	Balaenoptera musculus	Northeast Pacific	2000CA-ST15-01386	36921.1	6.52635	101.124	113.818
1717	Irvine et al., 2014	Balaenoptera musculus	Northeast Pacific	2000CA-ST15-01386	36922.5	6.51144	100.806	113.477
1718	Irvine et al., 2014	Balaenoptera musculus	Northeast Pacific	2000CA-ST15-01386	36924	6.46665	100.523	113.109
1719	Irvine et al., 2014	Balaenoptera musculus	Northeast Pacific	2000CA-ST15-01386	36924.1	6.45218	100.232	112.787
1720	Irvine et al., 2014	Balaenoptera musculus	Northeast Pacific	2000CA-ST15-01386	36925.1	6.4441	99.9186	112.46
1721	Irvine et al., 2014	Balaenoptera musculus	Northeast Pacific	2000CA-ST15-01386	36926.5	6.62774	99.3874	112.304
1722	Irvine et al., 2014	Balaenoptera musculus	Northeast Pacific	2000CA-ST15-01386	36929.1	6.10607	98.9782	110.841
1723	Irvine et al., 2014	Balaenoptera musculus	Northeast Pacific	2000CA-ST15-01386	36930.1	6.40232	98.3074	110.775
1724	Irvine et al., 2014	Balaenoptera musculus	Northeast Pacific	2000CA-ST15-01386	36931	6.22341	98.185	110.286
1725	Irvine et al., 2014	Balaenoptera musculus	Northeast Pacific	2000CA-ST15-01390	36806.7	15.368	81.1129	111.387
1726	Irvine et al., 2014	Balaenoptera musculus	Northeast Pacific	2000CA-ST15-01390	36809.6	15.3643	82.4932	112.758
1727	Irvine et al., 2014	Balaenoptera musculus	Northeast Pacific	2000CA-ST15-01390	36839	10.1234	97.17	117.153
1728	Irvine et al., 2014	Balaenoptera musculus	Northeast Pacific	2000CA-ST15-01390	36858.1	6.48673	104.945	117.795
1729	Irvine et al., 2014	Balaenoptera musculus	Northeast Pacific	2000CA-ST15-01390	36862	6.43007	105.408	118.174
1730	Irvine et al., 2014	Balaenoptera musculus	Northeast Pacific	2000CA-ST15-01390	36864	6.45928	105.661	118.496
1731	Irvine et al., 2014	Balaenoptera musculus	Northeast Pacific	2000CA-ST15-01390	36866	6.22032	106.242	118.586
1732	Irvine et al., 2014	Balaenoptera musculus	Northeast Pacific	2000CA-ST15-01390	36872.1	6.69266	106.615	119.878
1733	Irvine et al., 2014	Balaenoptera musculus	Northeast Pacific	2000CA-ST15-01390	36877.1	6.00878	107.648	119.522
1734	Irvine et al., 2014	Balaenoptera musculus	Northeast Pacific	2000CA-ST15-01390	36878.5	6.02222	107.675	119.572
1735	Irvine et al., 2014	Balaenoptera musculus	Northeast Pacific	2000CA-ST15-01390	36880.5	6.00463	107.716	119.577
1736	Irvine et al., 2014	Balaenoptera musculus	Northeast Pacific	2000CA-ST15-01390	36885	5.61668	108.123	119.186
1737	Irvine et al., 2014	Balaenoptera musculus	Northeast Pacific	2000CA-ST15-01390	36886.1	5.65197	108.019	119.147
1738	Irvine et al., 2014	Balaenoptera musculus	Northeast Pacific	2000CA-ST15-01390	36889	5.33294	108.278	118.75
1739	Irvine et al., 2014	Balaenoptera musculus	Northeast Pacific	2000CA-ST15-01390	36889.1	5.35358	108.185	118.697
1740	Irvine et al., 2014	Balaenoptera musculus	Northeast Pacific	2000CA-ST15-01390	36890.1	5.50373	107.968	118.776
1741	Irvine et al., 2014	Balaenoptera musculus	Northeast Pacific	2000CA-ST15-01390	36893.1	5.3748	107.836	118.373
1742	Irvine et al., 2014	Balaenoptera musculus	Northeast Pacific	2000CA-ST15-01390	36894.1	5.3439	107.761	118.232
1743	Irvine et al., 2014	Balaenoptera musculus	Northeast Pacific	2000CA-ST15-01390	36897	6.04352	106.745	118.628
1744	Irvine et al., 2014	Balaenoptera musculus	Northeast Pacific	2000CA-ST15-01390	36897.1	5.91649	106.736	118.363
1745	Irvine et al., 2014	Balaenoptera musculus	Northeast Pacific	2000CA-ST15-01390	36898.1	5.80782	106.721	118.122
1746	Irvine et al., 2014	Balaenoptera musculus	Northeast Pacific	2000CA-ST15-01390	36900	5.84028	106.531	117.996
1747	Irvine et al., 2014	Balaenoptera musculus	Northeast Pacific	2000CA-ST15-01390	36901	6.37826	105.787	118.34
1748	Irvine et al., 2014	Balaenoptera musculus	Northeast Pacific	2000CA-ST15-01390	36903.1	6.03833	105.659	117.506
1749	Irvine et al., 2014	Balaenoptera musculus	Northeast Pacific	2000CA-ST15-01390	36905	6.09177	105.447	117.389
1750	Irvine et al., 2014	Balaenoptera musculus	Northeast Pacific	2000CA-ST15-01390	36905.5	6.14773	105.211	117.257
1751	Irvine et al., 2014	Balaenoptera musculus	Northeast Pacific	2000CA-ST15-01390	36906.5	5.79954	105.342	116.694
1752	Irvine et al., 2014	Balaenoptera musculus	Northeast Pacific	2000CA-ST15-01390	36907.1	6.03718	104.895	116.719
1753	Irvine et al., 2014	Balaenoptera musculus	Northeast Pacific	2000CA-ST15-01390	36908.1	6.04373	104.685	116.515
1754	Irvine et al., 2014	Balaenoptera musculus	Northeast Pacific	2000CA-ST15-01390	36909	6.26472	104.234	116.505
1755	Irvine et al., 2014	Balaenoptera musculus	Northeast Pacific	2000CA-ST15-01390	36911.1	6.20326	103.842	115.982
1756	Irvine et al., 2014	Balaenoptera musculus	Northeast Pacific	2000CA-ST15-01390	36912.1	6.25381	103.544	115.784
1757	Irvine et al., 2014	Balaenoptera musculus	Northeast Pacific	2000CA-ST15-01390	36915	6.17299	103.135	115.205
1758	Irvine et al., 2014	Balaenoptera musculus	Northeast Pacific	2000CA-ST15-01390	36915.1	6.32882	102.705	115.089
1759	Irvine et al., 2014	Balaenoptera musculus	Northeast Pacific	2000CA-ST15-01390	36919.1	6.59789	101.338	114.255
1760	Irvine et al., 2014	Balaenoptera musculus	Northeast Pacific	2000CA-ST15-01390	36920.1	6.49357	101.159	113.866
1761	Irvine et al., 2014	Balaenoptera musculus	Northeast Pacific	2000CA-ST15-01390	36921.1	6.44971	100.926	113.539
1762	Irvine et al., 2014	Balaenoptera musculus	Northeast Pacific	2000CA-ST15-01390	36923	6.59561	100.477	113.383
1763	Irvine et al., 2014	Balaenoptera musculus	Northeast Pacific	2000CA-ST15-01390	36923.1	6.59786	100.191	113.096
1764	Irvine et al., 2014	Balaenoptera musculus	Northeast Pacific	2000CA-ST15-01390	36924.1	6.48666	100.004	112.684
1765	Irvine et al., 2014	Balaenoptera musculus	Northeast Pacific	2000CA-ST15-01390	36925.1	6.47675	99.6917	112.356
1766	Irvine et al., 2014	Balaenoptera musculus	Northeast Pacific	2000CA-ST15-01390	36927	7.25987	98.5546	112.801
1767	Irvine et al., 2014	Balaenoptera musculus	Northeast Pacific	2000CA-ST15-01390	36927.5	6.8006	98.735	112.049
1768	Irvine et al., 2014	Balaenoptera musculus	Northeast Pacific	2000CA-ST15-01390	36928.1	6.71015	98.5001	111.636
1769	Irvine et al., 2014	Balaenoptera musculus	Northeast Pacific	2000CA-ST15-01390	36929	6.78801	98.1089	111.397
1770	Irvine et al., 2014	Balaenoptera musculus	Northeast Pacific	2000CA-ST15-01390	36930.1	6.78182	97.7908	111.066
1771	Irvine et al., 2014	Balaenoptera musculus	Northeast Pacific	2000CA-ST15-01390	36931.5	6.46546	97.7894	110.429
1772	Irvine et al., 2014	Balaenoptera musculus	Northeast Pacific	2000CA-ST15-01390	36933	6.43059	97.4854	110.059
1773	Irvine et al., 2014	Balaenoptera musculus	Northeast Pacific	2000CA-ST15-01390	36933.1	6.62308	96.9493	109.913
1774	Irvine et al., 2014	Balaenoptera musculus	Northeast Pacific	2000CA-ST15-01390	36934.1	6.62289	96.6194	109.581
1775	Irvine et al., 2014	Balaenoptera musculus	Northeast Pacific	2000CA-ST15-01390	36935.5	6.57575	96.3392	109.202
1776	Irvine et al., 2014	Balaenoptera musculus	Northeast Pacific	2000CA-ST15-01390	36937.1	6.598	95.6367	108.544
1777	Irvine et al., 2014	Balaenoptera musculus	Northeast Pacific	2000CA-ST15-01390	36938.1	6.42364	95.4731	108.03
1778	Irvine et al., 2014	Balaenoptera musculus	Northeast Pacific	2000CA-ST15-01390	36939.5	6.45048	95.1183	107.72
1779	Irvine et al., 2014	Balaenoptera musculus	Northeast Pacific	2000CA-ST15-01390	36940.5	6.51224	94.7292	107.444
1780	Irvine et al., 2014	Balaenoptera musculus	Northeast Pacific	2000CA-ST15-01390	36941.1	6.51421	94.3725	107.094
1781	Irvine et al., 2014	Balaenoptera musculus	Northeast Pacific	2000CA-ST15-01390	36942.1	6.49391	94.0493	106.726
1782	Irvine et al., 2014	Balaenoptera musculus	Northeast Pacific	2000CA-ST15-01390	36945	6.63006	93.2213	106.163
1783	Irvine et al., 2014	Balaenoptera musculus	Northeast Pacific	2000CA-ST15-01390	36945.1	6.68256	92.8129	105.859
1784	Irvine et al., 2014	Balaenoptera musculus	Northeast Pacific	2000CA-ST15-01390	36947.1	6.69705	92.0862	105.16
1785	Irvine et al., 2014	Balaenoptera musculus	Northeast Pacific	2000CA-ST15-01390	36949.5	6.55855	91.5226	104.309
1786	Irvine et al., 2014	Balaenoptera musculus	Northeast Pacific	2000CA-ST15-01390	36950.1	6.71034	91.0138	104.101
1787	Irvine et al., 2014	Balaenoptera musculus	Northeast Pacific	2000CA-ST15-01390	36951.1	6.61834	90.7386	103.645
1788	Irvine et al., 2014	Balaenoptera musculus	Northeast Pacific	2000CA-ST15-01390	36952.5	6.70528	90.2902	103.37
1789	Irvine et al., 2014	Balaenoptera musculus	Northeast Pacific	2000CA-ST15-01390	36955.1	6.79943	89.0827	102.368
1790	Irvine et al., 2014	Balaenoptera musculus	Northeast Pacific	2000CA-ST15-01390	36958	6.34043	88.8498	101.182
1791	Irvine et al., 2014	Balaenoptera musculus	Northeast Pacific	2000CA-ST15-01390	36959.1	5.91087	88.5306	100.018
1792	Irvine et al., 2014	Balaenoptera musculus	Northeast Pacific	2000CA-ST15-01390	36964.1	6.13	86.4725	98.3957
1793	Irvine et al., 2014	Balaenoptera musculus	Northeast Pacific	2000CA-ST15-01390	36965.1	5.83127	86.4049	97.7266
1794	Irvine et al., 2014	Balaenoptera musculus	Northeast Pacific	2000CA-ST15-01390	36966.5	5.86787	85.9993	97.3942
1795	Irvine et al., 2014	Balaenoptera musculus	Northeast Pacific	2000CA-ST15-01390	36969.1	5.24361	85.5215	95.6528
1796	Irvine et al., 2014	Balaenoptera musculus	Northeast Pacific	2000CA-ST15-01390	36973.1	5.12741	84.1604	94.0682
1797	Irvine et al., 2014	Balaenoptera musculus	Northeast Pacific	2000CA-ST15-01390	36974.1	5.20421	83.7163	93.7825
1798	Irvine et al., 2014	Balaenoptera musculus	Northeast Pacific	2000CA-ST15-01390	36976	6.92943	81.6253	95.1663
1799	Irvine et al., 2014	Balaenoptera musculus	Northeast Pacific	2000CA-ST15-01390	36978.1	5.36606	82.1005	92.5203
1800	Irvine et al., 2014	Balaenoptera musculus	Northeast Pacific	2000CA-ST15-01390	36980	4.75563	82.3429	91.5305
1801	Irvine et al., 2014	Balaenoptera musculus	Northeast Pacific	2000CA-ST15-01390	36982	4.52366	81.8444	90.5628
1802	Irvine et al., 2014	Balaenoptera musculus	Northeast Pacific	2000CA-ST15-01390	36988	5.44875	78.3594	88.9034
1803	Irvine et al., 2014	Balaenoptera musculus	Northeast Pacific	2000CA-ST15-01390	36990	5.40595	78.0491	88.5116
1804	Irvine et al., 2014	Balaenoptera musculus	Northeast Pacific	2000CA-ST15-01390	36991.1	5.06258	77.6639	87.4309
1805	Irvine et al., 2014	Balaenoptera musculus	Northeast Pacific	2000CA-ST15-01390	36997	5.4247	75.6082	86.1412
1806	Irvine et al., 2014	Balaenoptera musculus	Northeast Pacific	2000CA-ST15-01390	37003.7	4.10506	73.9797	82.3385
1807	Irvine et al., 2014	Balaenoptera musculus	Northeast Pacific	2000CA-ST15-01390	37006	5.1372	72.3601	82.7834
1808	Irvine et al., 2014	Balaenoptera musculus	Northeast Pacific	2000CA-ST15-01390	37009	5.13732	71.3667	81.7865
1809	Irvine et al., 2014	Balaenoptera musculus	Northeast Pacific	2000CA-ST15-01390	37013.1	5.30016	69.6476	80.3873
1810	Irvine et al., 2014	Balaenoptera musculus	Northeast Pacific	2000CA-ST15-01390	37016	5.2714	69.0715	79.7509
1811	Irvine et al., 2014	Balaenoptera musculus	Northeast Pacific	2000CA-ST15-01390	37020.1	5.33345	67.6098	78.4066
1812	Irvine et al., 2014	Balaenoptera musculus	Northeast Pacific	2000CA-ST15-01390	37021.1	5.35658	67.2951	78.1361
1813	Irvine et al., 2014	Balaenoptera musculus	Northeast Pacific	2000CA-ST15-01390	37022.1	5.4468	66.9192	77.9386
1814	Irvine et al., 2014	Balaenoptera musculus	Northeast Pacific	2000CA-ST15-01390	37025.1	5.50261	66.0484	77.1733
1815	Irvine et al., 2014	Balaenoptera musculus	Northeast Pacific	2000CA-ST15-01390	37026.1	5.53427	65.75	76.9361
1816	Irvine et al., 2014	Balaenoptera musculus	Northeast Pacific	2000CA-ST15-01390	37030.1	5.88235	64.8405	76.3462
1817	Irvine et al., 2014	Balaenoptera musculus	Northeast Pacific	2000CA-ST15-01390	37033	6.2884	63.9378	76.2518
1818	Irvine et al., 2014	Balaenoptera musculus	Northeast Pacific	2000CA-ST15-01390	37038	6.24158	62.5676	74.7663
1819	Irvine et al., 2014	Balaenoptera musculus	Northeast Pacific	2000CA-ST15-01390	37039.1	6.34094	62.1641	74.5399
1820	Irvine et al., 2014	Balaenoptera musculus	Northeast Pacific	2000CA-ST15-01390	37040.5	6.9653	61.1876	74.7843
1821	Irvine et al., 2014	Balaenoptera musculus	Northeast Pacific	2000CA-ST15-01390	37044.1	7.69449	59.5223	74.5522
1822	Irvine et al., 2014	Balaenoptera musculus	Northeast Pacific	2000CA-ST15-01390	37054.5	9.53285	55.443	74.0787
1823	Irvine et al., 2014	Balaenoptera musculus	Northeast Pacific	2000CA-ST15-01390	37057.1	10.2216	54.2217	74.2217
1824	Irvine et al., 2014	Balaenoptera musculus	Northeast Pacific	2000CA-ST15-01390	37064	12.3128	50.6046	74.7317
1825	Irvine et al., 2014	Balaenoptera musculus	Northeast Pacific	2000CA-ST15-01390	37077.1	14.0953	47.912	75.5749
1826	Irvine et al., 2014	Balaenoptera musculus	Northeast Pacific	2000CA-ST15-01390	37080.5	14.2264	48.1893	76.125
1827	Irvine et al., 2014	Balaenoptera musculus	Northeast Pacific	2000CA-ST15-10823	36803.8	15.3695	79.722	110.002
1828	Irvine et al., 2014	Balaenoptera musculus	Northeast Pacific	2000CA-ST15-10823	36804.1	15.1224	80.3984	110.19
1829	Irvine et al., 2014	Balaenoptera musculus	Northeast Pacific	2000CA-ST15-10825	36805	15.3692	80.6507	110.928
1830	Irvine et al., 2014	Balaenoptera musculus	Northeast Pacific	2000CA-ST15-10825	36807	15.0669	81.309	111
1831	Irvine et al., 2014	Balaenoptera musculus	Northeast Pacific	2000CA-ST15-10825	36808.6	15.1471	82.2332	112.068
1832	Irvine et al., 2014	Balaenoptera musculus	Northeast Pacific	2000CA-ST15-10825	36811	15.7322	82.7321	113.713
1833	Irvine et al., 2014	Balaenoptera musculus	Northeast Pacific	2000CA-ST15-10825	36811.5	15.7175	83.2066	114.158
1834	Irvine et al., 2014	Balaenoptera musculus	Northeast Pacific	2000CA-ST15-10825	36812.5	15.9042	83.5364	114.854
1835	Irvine et al., 2014	Balaenoptera musculus	Northeast Pacific	2000CA-ST15-10825	36814	15.5619	84.2298	114.874
1836	Irvine et al., 2014	Balaenoptera musculus	Northeast Pacific	2000CA-ST15-10825	36815.1	15.4808	85.1902	115.673
1837	Irvine et al., 2014	Balaenoptera musculus	Northeast Pacific	2000CA-ST15-10825	36817.5	15.7022	85.9862	116.899
1838	Irvine et al., 2014	Balaenoptera musculus	Northeast Pacific	2000CA-ST15-10825	36818.1	15.6101	86.4756	117.208
1839	Irvine et al., 2014	Balaenoptera musculus	Northeast Pacific	2000CA-ST15-10825	36819.1	15.605	86.9519	117.671
1840	Irvine et al., 2014	Balaenoptera musculus	Northeast Pacific	2000CA-ST15-10825	36820.5	15.7354	87.3287	118.302
1841	Irvine et al., 2014	Balaenoptera musculus	Northeast Pacific	2000CA-ST15-10825	36821.7	15.5023	87.8876	118.403
1842	Irvine et al., 2014	Balaenoptera musculus	Northeast Pacific	2000CA-ST15-10825	36822.1	15.5325	88.3226	118.895
1843	Irvine et al., 2014	Balaenoptera musculus	Northeast Pacific	2000CA-ST15-10827	36803.8	15.3689	79.7212	110
1844	Irvine et al., 2014	Balaenoptera musculus	Northeast Pacific	2000CA-ST15-10827	36804.1	15.3896	80.1768	110.494
1845	Irvine et al., 2014	Balaenoptera musculus	Northeast Pacific	2000CA-ST15-10827	36805.1	15.3815	80.6433	110.944
1846	Irvine et al., 2014	Balaenoptera musculus	Northeast Pacific	2000CA-ST15-10827	36806.1	15.3701	81.1138	111.392
1847	Irvine et al., 2014	Balaenoptera musculus	Northeast Pacific	2000CA-ST15-10828	36805	15.3692	80.1864	110.465
1848	Irvine et al., 2014	Balaenoptera musculus	Northeast Pacific	2000CA-ST15-10828	36805.1	15.3435	80.6719	110.899
1849	Irvine et al., 2014	Balaenoptera musculus	Northeast Pacific	2000CA-ST15-10828	36806.1	15.3735	81.1052	111.391
1850	Irvine et al., 2014	Balaenoptera musculus	Northeast Pacific	2000CA-ST15-10828	36807.1	15.3483	81.5933	111.827
1851	Irvine et al., 2014	Balaenoptera musculus	Northeast Pacific	2000CA-ST15-10828	36808.1	15.4775	81.9761	112.46
1852	Irvine et al., 2014	Balaenoptera musculus	Northeast Pacific	2000CA-ST15-10828	36813.6	15.2248	84.4068	114.395
1853	Irvine et al., 2014	Balaenoptera musculus	Northeast Pacific	2000CA-ST15-10828	36814.6	15.3315	84.77	114.968
1854	Irvine et al., 2014	Balaenoptera musculus	Northeast Pacific	2000CA-ST15-10828	36816	15.0678	85.454	115.127
1855	Irvine et al., 2014	Balaenoptera musculus	Northeast Pacific	2000CA-ST15-10828	36816.7	15.3237	85.6703	115.851
1856	Irvine et al., 2014	Balaenoptera musculus	Northeast Pacific	2000CA-ST15-10828	36821.6	15.0479	88.0639	117.694
1857	Irvine et al., 2014	Balaenoptera musculus	Northeast Pacific	2000CA-ST15-10828	36822.1	15.2415	88.3432	118.356
1858	Irvine et al., 2014	Balaenoptera musculus	Northeast Pacific	2000CA-ST15-10828	36830	13.2296	92.3272	118.384
1859	Irvine et al., 2014	Balaenoptera musculus	Northeast Pacific	2000CA-ST15-10828	36831	12.6677	93.0797	118.029
1860	Irvine et al., 2014	Balaenoptera musculus	Northeast Pacific	2000CA-ST15-10828	36843.7	9.72119	99.1799	118.345
1861	Irvine et al., 2014	Balaenoptera musculus	Northeast Pacific	2000CA-ST15-10828	36848.5	10.2428	99.9144	120.135
1862	Irvine et al., 2014	Balaenoptera musculus	Northeast Pacific	2000CA-ST15-10828	36863	7.39553	104.617	119.312
1863	Irvine et al., 2014	Balaenoptera musculus	Northeast Pacific	2000CA-ST15-10832	36803.9	15.3698	79.7217	110.002
1864	Irvine et al., 2014	Balaenoptera musculus	Northeast Pacific	2000CA-ST15-10832	36840.1	10.89	97.3367	118.816
1865	Irvine et al., 2014	Balaenoptera musculus	Northeast Pacific	2000CA-ST15-10832	36841.1	10.689	97.8589	118.934
1866	Irvine et al., 2014	Balaenoptera musculus	Northeast Pacific	2000CA-ST15-10832	36843.7	10.3699	98.6058	119.06
1867	Irvine et al., 2014	Balaenoptera musculus	Northeast Pacific	2000CA-ST15-10832	36844.5	10.3297	98.9828	119.351
1868	Irvine et al., 2014	Balaenoptera musculus	Northeast Pacific	2000CA-ST15-10832	36845.1	10.2469	99.363	119.563
1869	Irvine et al., 2014	Balaenoptera musculus	Northeast Pacific	2000CA-ST15-10832	36849.1	9.60136	100.712	119.661
1870	Irvine et al., 2014	Balaenoptera musculus	Northeast Pacific	2000CA-ST15-10832	36854.5	9.0924	102.165	120.123
1871	Irvine et al., 2014	Balaenoptera musculus	Northeast Pacific	2000CA-ST15-10832	36857.1	8.96652	102.827	120.545
1872	Irvine et al., 2014	Balaenoptera musculus	Northeast Pacific	2000CA-ST15-10832	36858.1	8.92238	103.049	120.68
1873	Irvine et al., 2014	Balaenoptera musculus	Northeast Pacific	2000CA-ST15-10832	36862.1	8.27329	104.229	120.584
1874	Irvine et al., 2014	Balaenoptera musculus	Northeast Pacific	2000CA-ST15-10832	36864	7.88754	104.726	120.316
1875	Irvine et al., 2014	Balaenoptera musculus	Northeast Pacific	2000CA-ST15-10832	36866	7.63642	105.186	120.286
1876	Irvine et al., 2014	Balaenoptera musculus	Northeast Pacific	2000CA-ST15-10832	36868	7.2984	105.735	120.166
1877	Irvine et al., 2014	Balaenoptera musculus	Northeast Pacific	2000CA-ST15-10832	36871.1	7.02438	106.281	120.189
1878	Irvine et al., 2014	Balaenoptera musculus	Northeast Pacific	2000CA-ST15-10832	36872.1	7.1149	106.24	120.336
1879	Irvine et al., 2014	Balaenoptera musculus	Northeast Pacific	2000CA-ST15-10832	36873.5	7.29037	106.137	120.584
1880	Irvine et al., 2014	Balaenoptera musculus	Northeast Pacific	2000CA-ST15-10832	36875	7.307	106.165	120.649
1881	Irvine et al., 2014	Balaenoptera musculus	Northeast Pacific	2000CA-ST15-10832	36876.1	7.24571	106.349	120.704
1882	Irvine et al., 2014	Balaenoptera musculus	Northeast Pacific	2000CA-ST15-10832	36879	6.92335	106.764	120.466
1883	Irvine et al., 2014	Balaenoptera musculus	Northeast Pacific	2000CA-ST15-10832	36879.5	7.12374	106.593	120.692
1884	Irvine et al., 2014	Balaenoptera musculus	Northeast Pacific	2000CA-ST15-10832	36881.5	7.23243	106.52	120.828
1885	Irvine et al., 2014	Balaenoptera musculus	Northeast Pacific	2000CA-ST15-10832	36884.5	7.17166	106.558	120.734
1886	Irvine et al., 2014	Balaenoptera musculus	Northeast Pacific	2000CA-ST15-10832	36888.5	6.71527	106.881	120.122
1887	Irvine et al., 2014	Balaenoptera musculus	Northeast Pacific	2000CA-ST15-10832	36889.6	6.52609	106.99	119.853
1888	Irvine et al., 2014	Balaenoptera musculus	Northeast Pacific	2000CA-ST15-10832	36890.1	6.60303	106.841	119.855
1889	Irvine et al., 2014	Balaenoptera musculus	Northeast Pacific	2000CA-ST15-10832	36893	6.49961	106.855	119.634
1890	Irvine et al., 2014	Balaenoptera musculus	Northeast Pacific	2000CA-ST15-10832	36899.1	5.78512	106.7	118.024
1891	Irvine et al., 2014	Balaenoptera musculus	Northeast Pacific	2000CA-ST15-10832	36901	5.7586	106.616	117.873
1892	Irvine et al., 2014	Balaenoptera musculus	Northeast Pacific	2000CA-ST15-10832	36902.5	5.96614	106.053	117.721
1893	Irvine et al., 2014	Balaenoptera musculus	Northeast Pacific	2000CA-ST15-10832	36905	5.88719	105.713	117.229
1894	Irvine et al., 2014	Balaenoptera musculus	Northeast Pacific	2000CA-ST15-10832	36906	5.95683	105.449	117.101
1895	Irvine et al., 2014	Balaenoptera musculus	Northeast Pacific	2000CA-ST15-10832	36906.5	5.90832	105.293	116.846
1896	Irvine et al., 2014	Balaenoptera musculus	Northeast Pacific	2000CA-ST15-10832	36910	6.43438	104.078	116.684
1897	Irvine et al., 2014	Balaenoptera musculus	Northeast Pacific	2000CA-ST15-10832	36910.1	6.43061	103.846	116.444
1898	Irvine et al., 2014	Balaenoptera musculus	Northeast Pacific	2000CA-ST15-10832	36912.1	6.51012	103.299	116.048
1899	Irvine et al., 2014	Balaenoptera musculus	Northeast Pacific	2000CA-ST15-10832	36916	6.653	102.398	115.425
1900	Irvine et al., 2014	Balaenoptera musculus	Northeast Pacific	2000CA-ST15-10832	36916.1	6.60594	102.177	115.108
1901	Irvine et al., 2014	Balaenoptera musculus	Northeast Pacific	2000CA-ST15-10832	36917.1	6.97924	101.53	115.207
1902	Irvine et al., 2014	Balaenoptera musculus	Northeast Pacific	2000CA-ST15-10832	36919.1	6.85543	101.082	114.513
1903	Irvine et al., 2014	Balaenoptera musculus	Northeast Pacific	2000CA-ST15-10832	36921.1	6.55336	100.823	113.643
1904	Irvine et al., 2014	Balaenoptera musculus	Northeast Pacific	2000CA-ST15-10832	36923	6.49835	100.578	113.288
1905	Irvine et al., 2014	Balaenoptera musculus	Northeast Pacific	2000CA-ST15-10832	36924.5	6.83801	99.626	113.018
1906	Irvine et al., 2014	Balaenoptera musculus	Northeast Pacific	2000CA-ST15-10832	36925.1	6.8357	99.3101	112.701
1907	Irvine et al., 2014	Balaenoptera musculus	Northeast Pacific	2000CA-ST15-10832	36927	6.58387	99.2927	112.164
1908	Irvine et al., 2014	Balaenoptera musculus	Northeast Pacific	2000CA-ST15-10832	36929.6	6.66929	98.2776	111.309
1909	Irvine et al., 2014	Balaenoptera musculus	Northeast Pacific	2000CA-ST15-10832	36930.1	6.64255	97.9815	110.958
1910	Irvine et al., 2014	Balaenoptera musculus	Northeast Pacific	2000CA-ST15-10832	36932.5	7.15816	96.7942	110.806
1911	Irvine et al., 2014	Balaenoptera musculus	Northeast Pacific	2000CA-ST15-10832	36934.1	7.13475	96.1634	110.123
1912	Irvine et al., 2014	Balaenoptera musculus	Northeast Pacific	2000CA-ST15-10832	36937.1	7.36736	94.9171	109.338
1913	Irvine et al., 2014	Balaenoptera musculus	Northeast Pacific	2000CA-ST15-10832	36938.1	7.46645	94.4791	109.096
1914	Irvine et al., 2014	Balaenoptera musculus	Northeast Pacific	2000CA-ST15-10832	36939.5	7.40304	94.2072	108.692
1915	Irvine et al., 2014	Balaenoptera musculus	Northeast Pacific	2000CA-ST15-10832	36940.5	7.48079	93.7801	108.421
1916	Irvine et al., 2014	Balaenoptera musculus	Northeast Pacific	2000CA-ST15-10832	36941.1	7.59228	93.3207	108.183
1917	Irvine et al., 2014	Balaenoptera musculus	Northeast Pacific	2000CA-ST15-10832	36942.1	7.68237	92.8827	107.924
1918	Irvine et al., 2014	Balaenoptera musculus	Northeast Pacific	2000CA-ST15-10832	36943.1	7.66248	92.5532	107.553
1919	Irvine et al., 2014	Balaenoptera musculus	Northeast Pacific	2000CA-ST15-10832	36944.5	7.60697	92.2582	107.144
1920	Irvine et al., 2014	Balaenoptera musculus	Northeast Pacific	2000CA-ST15-10832	36945.5	7.58405	91.9231	106.764
1921	Irvine et al., 2014	Balaenoptera musculus	Northeast Pacific	2000CA-ST15-10832	36946.1	7.57668	91.5737	106.4
1922	Irvine et al., 2014	Balaenoptera musculus	Northeast Pacific	2000CA-ST15-10832	36947.1	7.61121	91.1854	106.078
1923	Irvine et al., 2014	Balaenoptera musculus	Northeast Pacific	2000CA-ST15-10832	36948.5	7.62849	90.8131	105.738
1924	Irvine et al., 2014	Balaenoptera musculus	Northeast Pacific	2000CA-ST15-10832	36949.5	7.57791	90.5089	105.329
1925	Irvine et al., 2014	Balaenoptera musculus	Northeast Pacific	2000CA-ST15-10832	36950.1	7.59939	90.122	104.987
1926	Irvine et al., 2014	Balaenoptera musculus	Northeast Pacific	2000CA-ST15-10832	36951.1	7.60583	89.755	104.631
1927	Irvine et al., 2014	Balaenoptera musculus	Northeast Pacific	2000CA-ST15-10832	36952.1	7.61157	89.3869	104.274
1928	Irvine et al., 2014	Balaenoptera musculus	Northeast Pacific	2000CA-ST15-10832	36953.5	7.63105	89.0042	103.93
1929	Irvine et al., 2014	Balaenoptera musculus	Northeast Pacific	2000CA-ST15-10832	36955	7.596	88.6691	103.528
1930	Irvine et al., 2014	Balaenoptera musculus	Northeast Pacific	2000CA-ST15-10832	36955.1	7.5938	88.3067	103.161
1931	Irvine et al., 2014	Balaenoptera musculus	Northeast Pacific	2000CA-ST15-10832	36956.1	7.61718	87.9213	102.819
1932	Irvine et al., 2014	Balaenoptera musculus	Northeast Pacific	2000CA-ST15-10832	36957	7.61803	87.5518	102.453
1933	Irvine et al., 2014	Balaenoptera musculus	Northeast Pacific	2000CA-ST15-10832	36958.5	7.57972	87.2212	102.048
1934	Irvine et al., 2014	Balaenoptera musculus	Northeast Pacific	2000CA-ST15-10832	36959.1	7.64033	86.7936	101.741
1935	Irvine et al., 2014	Balaenoptera musculus	Northeast Pacific	2000CA-ST15-10832	36960.1	7.73319	86.3306	101.467
1936	Irvine et al., 2014	Balaenoptera musculus	Northeast Pacific	2000CA-ST15-10832	36961.5	7.75618	85.9401	101.123
1937	Irvine et al., 2014	Balaenoptera musculus	Northeast Pacific	2000CA-ST15-10832	36962.5	7.61219	85.714	100.613
1938	Irvine et al., 2014	Balaenoptera musculus	Northeast Pacific	2000CA-ST15-10832	36963	7.72774	85.2299	100.361
1939	Irvine et al., 2014	Balaenoptera musculus	Northeast Pacific	2000CA-ST15-10832	36964.1	7.81205	84.7774	100.078
1940	Irvine et al., 2014	Balaenoptera musculus	Northeast Pacific	2000CA-ST15-10832	36965.1	7.70949	84.5118	99.6088
1941	Irvine et al., 2014	Balaenoptera musculus	Northeast Pacific	2000CA-ST15-10832	36966.5	7.84473	84.008	99.3777
1942	Irvine et al., 2014	Balaenoptera musculus	Northeast Pacific	2000CA-ST15-10832	36968	7.8378	83.6468	99.0048
1943	Irvine et al., 2014	Balaenoptera musculus	Northeast Pacific	2000CA-ST15-10832	36968.1	7.6566	83.4603	98.4567
1944	Irvine et al., 2014	Balaenoptera musculus	Northeast Pacific	2000CA-ST15-10832	36969.1	7.70889	83.0409	98.1427
1945	Irvine et al., 2014	Balaenoptera musculus	Northeast Pacific	2000CA-ST15-10832	36970	7.71944	82.663	97.7874
1946	Irvine et al., 2014	Balaenoptera musculus	Northeast Pacific	2000CA-ST15-10832	36971	7.77379	82.2418	97.4771
1947	Irvine et al., 2014	Balaenoptera musculus	Northeast Pacific	2000CA-ST15-10832	36972.5	7.97581	81.6732	97.3142
1948	Irvine et al., 2014	Balaenoptera musculus	Northeast Pacific	2000CA-ST15-10832	36973.1	8.04993	81.233	97.0221
1949	Irvine et al., 2014	Balaenoptera musculus	Northeast Pacific	2000CA-ST15-10832	36974.5	8.04636	80.8712	96.6552
1950	Irvine et al., 2014	Balaenoptera musculus	Northeast Pacific	2000CA-ST15-10832	36975.5	8.06262	80.4905	96.3115
1951	Irvine et al., 2014	Balaenoptera musculus	Northeast Pacific	2000CA-ST15-10832	36976.1	8.06492	80.123	95.9463
1952	Irvine et al., 2014	Balaenoptera musculus	Northeast Pacific	2000CA-ST15-10832	36977.6	8.05618	79.768	95.5764
1953	Irvine et al., 2014	Balaenoptera musculus	Northeast Pacific	2000CA-ST15-10832	36978.1	8.06474	79.3963	95.2237
1954	Irvine et al., 2014	Balaenoptera musculus	Northeast Pacific	2000CA-ST15-10832	36980	8.09905	78.9994	94.8959
1955	Irvine et al., 2014	Balaenoptera musculus	Northeast Pacific	2000CA-ST15-10832	36980	8.08027	78.6562	94.5165
1956	Irvine et al., 2014	Balaenoptera musculus	Northeast Pacific	2000CA-ST15-10832	36981.1	8.09804	78.2771	94.1741
1957	Irvine et al., 2014	Balaenoptera musculus	Northeast Pacific	2000CA-ST15-10832	36982.1	8.09961	77.9145	93.8151
1958	Irvine et al., 2014	Balaenoptera musculus	Northeast Pacific	2000CA-ST15-10832	36983	8.08468	77.567	93.4343
1959	Irvine et al., 2014	Balaenoptera musculus	Northeast Pacific	2000CA-ST15-10832	36985.1	7.92317	77.008	92.55
1960	Irvine et al., 2014	Balaenoptera musculus	Northeast Pacific	2000CA-ST15-10832	36986.1	8.0788	76.4942	92.3482
1961	Irvine et al., 2014	Balaenoptera musculus	Northeast Pacific	2000CA-ST15-10832	36987.1	7.88271	76.332	91.7928
1962	Irvine et al., 2014	Balaenoptera musculus	Northeast Pacific	2000CA-ST15-10832	36988	7.78656	76.0687	91.3343
1963	Irvine et al., 2014	Balaenoptera musculus	Northeast Pacific	2000CA-ST15-10832	36989.1	7.623	75.8661	90.7942
1964	Irvine et al., 2014	Balaenoptera musculus	Northeast Pacific	2000CA-ST15-10832	36990.5	7.78515	75.3584	90.6199
1965	Irvine et al., 2014	Balaenoptera musculus	Northeast Pacific	2000CA-ST15-10832	36991.1	7.76539	75.0242	90.2463
1966	Irvine et al., 2014	Balaenoptera musculus	Northeast Pacific	2000CA-ST15-10832	36992.5	7.82439	74.5976	89.9263
1967	Irvine et al., 2014	Balaenoptera musculus	Northeast Pacific	2000CA-ST15-10832	36994.1	7.87525	73.8638	89.3089
1968	Irvine et al., 2014	Balaenoptera musculus	Northeast Pacific	2000CA-ST15-10832	36995.1	7.72539	73.668	88.8157
1969	Irvine et al., 2014	Balaenoptera musculus	Northeast Pacific	2000CA-ST15-10832	36996.1	7.86254	73.1849	88.6084
1970	Irvine et al., 2014	Balaenoptera musculus	Northeast Pacific	2000CA-ST15-10832	36997	7.80815	72.8882	88.1992
1971	Irvine et al., 2014	Balaenoptera musculus	Northeast Pacific	2000CA-ST15-10832	36998.5	7.81244	72.5461	87.8708
1972	Irvine et al., 2014	Balaenoptera musculus	Northeast Pacific	2000CA-ST15-10832	36999.1	7.88311	72.1332	87.5995
1973	Irvine et al., 2014	Balaenoptera musculus	Northeast Pacific	2000CA-ST15-10832	37000.1	7.85902	71.8199	87.2406
1974	Irvine et al., 2014	Balaenoptera musculus	Northeast Pacific	2000CA-ST15-10832	37002	7.76916	71.5754	86.8196
1975	Irvine et al., 2014	Balaenoptera musculus	Northeast Pacific	2000CA-ST15-10832	37003.1	7.80872	70.8654	86.1907
1976	Irvine et al., 2014	Balaenoptera musculus	Northeast Pacific	2000CA-ST15-10832	37004.1	7.7797	70.5613	85.8291
1977	Irvine et al., 2014	Balaenoptera musculus	Northeast Pacific	2000CA-ST15-10832	37005	7.5352	70.4818	85.2649
1978	Irvine et al., 2014	Balaenoptera musculus	Northeast Pacific	2000CA-ST15-10832	37006.5	7.80438	69.8859	85.2094
1979	Irvine et al., 2014	Balaenoptera musculus	Northeast Pacific	2000CA-ST15-10832	37007.1	7.85585	69.5005	84.9232
1980	Irvine et al., 2014	Balaenoptera musculus	Northeast Pacific	2000CA-ST15-10832	37008.1	7.87916	69.1568	84.6288
1981	Irvine et al., 2014	Balaenoptera musculus	Northeast Pacific	2000CA-ST15-10832	37009	7.8859	68.8223	84.3053
1982	Irvine et al., 2014	Balaenoptera musculus	Northeast Pacific	2000CA-ST15-10832	37011.7	7.73068	68.3321	83.5015
1983	Irvine et al., 2014	Balaenoptera musculus	Northeast Pacific	2000CA-ST15-10832	37012.1	7.78088	67.9657	83.2353
1984	Irvine et al., 2014	Balaenoptera musculus	Northeast Pacific	2000CA-ST15-10832	37013.1	7.70822	67.6873	82.7954
1985	Irvine et al., 2014	Balaenoptera musculus	Northeast Pacific	2000CA-ST15-10832	37014.5	7.74619	67.3751	82.5747
1986	Irvine et al., 2014	Balaenoptera musculus	Northeast Pacific	2000CA-ST15-10832	37015.5	7.75337	67.0455	82.2535
1987	Irvine et al., 2014	Balaenoptera musculus	Northeast Pacific	2000CA-ST15-10832	37016.1	7.85899	66.6499	82.0752
1988	Irvine et al., 2014	Balaenoptera musculus	Northeast Pacific	2000CA-ST15-10832	37017.1	7.64614	66.5646	81.5656
1989	Irvine et al., 2014	Balaenoptera musculus	Northeast Pacific	2000CA-ST15-10832	37018.5	7.91086	65.9748	81.4955
1990	Irvine et al., 2014	Balaenoptera musculus	Northeast Pacific	2000CA-ST15-10832	37020.1	7.85196	65.3685	80.7473
1991	Irvine et al., 2014	Balaenoptera musculus	Northeast Pacific	2000CA-ST15-10832	37021.1	8.21426	64.6674	80.7579
1992	Irvine et al., 2014	Balaenoptera musculus	Northeast Pacific	2000CA-ST15-10832	37022.5	8.42489	64.0912	80.5845
1993	Irvine et al., 2014	Balaenoptera musculus	Northeast Pacific	2000CA-ST15-10832	37023.7	8.70545	63.4451	80.4828
1994	Irvine et al., 2014	Balaenoptera musculus	Northeast Pacific	2000CA-ST15-10832	37025.1	8.91296	62.5325	79.9599
1995	Irvine et al., 2014	Balaenoptera musculus	Northeast Pacific	2000CA-ST15-10832	37026.1	8.98462	62.0763	79.6302
1996	Irvine et al., 2014	Balaenoptera musculus	Northeast Pacific	2000CA-ST15-10832	37029.1	9.4227	60.4356	78.8167
1997	Irvine et al., 2014	Balaenoptera musculus	Northeast Pacific	2000CA-ST15-10832	37030	9.45379	60.0192	78.4501
1998	Irvine et al., 2014	Balaenoptera musculus	Northeast Pacific	2000CA-ST15-10832	37031.1	9.61222	59.5048	78.2439
1999	Irvine et al., 2014	Balaenoptera musculus	Northeast Pacific	2000CA-ST15-10832	37032.5	9.80871	58.8991	78.0175
[truncated: 50,260 more rows]
