# Supplementary material for: Baleen whale navigation in astronomically referenced magnetic coordinates
Source: Research Square preprint supplement (doi:10.21203/rs.3.rs-4613940/v1), 2024-07-01
Supplement: Supplementary file 2 [file 90519e523803dc8a394bb68a.xlsx]

## Sheet: All Species - Whaling
Index	VoyageID	Year	Encounter	Species	Source	EMM Declination	Decimal Year	SRA-MD	SSAacw+MD			All Species	Blue	Bowhead	Fin	Gray	Humpback	Right
1	AV07925	1784	Sight	Finback	AOWL	2.06672	1784.41	58.0627	64.1721		Total	39302	666	2485	9753	612	9569	16217
2	AV07925	1784	Sight	Finback	AOWL	2.82709	1784.43	56.4492	64.0664
3	AV07925	1784	Sight	Finback	AOWL	4.00222	1784.54	57.0358	67.4566
4	AV07925	1784	Sight	Finback	AOWL	4.11934	1784.55	58.0522	68.6597
5	AV08064	1791	Sight	Finback	AOWL	9.67221	1791.28	70.1835	91.0561
6	AV08064	1791	Sight	Finback	AOWL	9.09673	1791.37	59.8259	79.487
7	AV08064	1791	Sight	Finback	AOWL	9.14064	1791.38	59.4876	79.2496
8	AV08064	1791	Sight	Finback	AOWL	9.18158	1791.38	58.9079	78.7655
9	AV08064	1791	Sight	Finback	AOWL	9.60531	1791.42	55.1007	75.9293
10	AV01286	1792	Sight	Finback	AOWL	-2.55196	1792.36	74.5355	68.2523
11	AV01286	1792	Sight	Finback	AOWL	-2.1602	1792.36	73.752	68.3325
12	AV01286	1792	Sight	Finback	AOWL	-1.92461	1792.37	73.1411	68.2814
13	AV01286	1792	Sight	Finback	AOWL	-2.03985	1792.39	72.0583	67.7661
14	AV01286	1792	Sight	Finback	AOWL	-1.96688	1792.39	71.7953	67.5588
15	AV01286	1792	Sight	Finback	AOWL	-1.83863	1792.41	70.1414	65.9702
16	AV01286	1792	Sight	Finback	AOWL	-5.42119	1792.51	72.6253	61.1927
17	AV08065	1792	Sight	Finback	AOWL	-1.85641	1792.05	112.457	110.107
18	AV08065	1792	Sight	Finback	AOWL	0.141982	1792.08	106.629	107.973
19	AV08065	1792	Sight	Finback	AOWL	1.53819	1792.1	103.724	107.906
20	AV08065	1792	Sight	Finback	AOWL	9.8531	1792.27	70.7545	92.0417
21	AV08065	1792	Sight	Finback	AOWL	10.1831	1792.31	65.0763	87.106
22	AV08065	1792	Sight	Finback	AOWL	9.80055	1792.32	64.6399	85.8207
23	AV08065	1792	Sight	Finback	AOWL	9.18923	1792.38	59.0574	78.8967
24	AV08065	1792	Sight	Finback	AOWL	9.18338	1792.39	57.9065	77.7357
25	AV08065	1792	Sight	Finback	AOWL	9.31845	1792.42	56.141	76.2752
26	AV08065	1792	Sight	Finback	AOWL	9.37011	1792.44	54.894	75.1367
27	AV08065	1792	Sight	Finback	AOWL	9.3141	1792.46	54.5601	74.6627
28	AV08065	1792	Sight	Finback	AOWL	9.14999	1792.48	54.9202	74.6251
29	AV08065	1792	Sight	Finback	AOWL	9.13504	1792.49	54.997	74.6646
30	AV08065	1792	Sight	Finback	AOWL	10.0319	1792.54	55.9468	77.5607
31	AV08065	1792	Sight	Finback	AOWL	10.1218	1792.58	58.9426	80.7075
32	AV01286	1792	Strike	Humpback	AOWL	-11.3912	1792.58	82.9492	59.0386
33	AV01286	1792	Strike	Humpback	AOWL	-11.3901	1792.59	84.0676	60.1625
34	AV01286	1792	Strike	Humpback	AOWL	-10.2665	1792.61	85.8801	64.3646
35	AV01286	1792	Strike	Humpback	AOWL	-10.2125	1792.62	86.7944	65.3938
36	AV01286	1792	Strike	Humpback	AOWL	-10.1924	1792.62	87.1026	65.7448
37	AV01286	1792	Strike	Humpback	AOWL	-10.1588	1792.63	87.7331	66.4469
38	AV01286	1792	Strike	Humpback	AOWL	-10.0858	1792.63	87.9977	66.8624
39	AV01286	1792	Strike	Humpback	AOWL	-10.0121	1792.63	88.2637	67.2806
40	AV01286	1792	Strike	Humpback	AOWL	-9.86795	1792.64	88.8048	68.1194
41	AV01286	1792	Strike	Humpback	AOWL	-10.2665	1792.61	85.8801	64.3646
42	AV01286	1792	Strike	Humpback	AOWL	-10.2125	1792.62	86.7944	65.3938
43	AV01286	1792	Sight	Humpback	AOWL	-11.0866	1792.56	80.8777	57.5783
44	AV01286	1792	Sight	Humpback	AOWL	-11.1986	1792.56	81.215	57.6855
45	AV01286	1792	Sight	Humpback	AOWL	-11.3567	1792.57	82.6429	58.7991
46	AV01286	1792	Sight	Humpback	AOWL	-11.3896	1792.59	84.6529	60.751
47	AV01286	1792	Sight	Humpback	AOWL	-11.3131	1792.6	84.889	61.1487
48	AV01286	1792	Sight	Humpback	AOWL	-10.307	1792.61	85.2896	63.6882
49	AV01286	1792	Sight	Humpback	AOWL	-10.2328	1792.62	86.4889	65.0453
50	AV08065	1792	Sight	Humpback	AOWL	2.24639	1792.1	102.713	108.33
51	AV01286	1792	Strike	Humpback	AOWL	-11.3993	1792.58	82.9554	59.0276
52	AV01286	1792	Strike	Humpback	AOWL	-11.3901	1792.59	84.0676	60.1625
53	AV01286	1792	Strike	Humpback	AOWL	-10.056	1792.61	85.6859	64.6065
54	AV01286	1792	Strike	Humpback	AOWL	-10.0555	1792.61	86.0035	64.926
55	AV01286	1792	Strike	Humpback	AOWL	-10.0549	1792.62	86.6477	65.5736
56	AV01286	1792	Strike	Humpback	AOWL	-10.0537	1792.63	87.6344	66.5658
57	AV01286	1792	Strike	Humpback	AOWL	-10.0535	1792.63	87.9686	66.9015
58	AV01286	1792	Strike	Humpback	AOWL	-10.0524	1792.64	88.9846	67.9231
59	AV01286	1792	Sight	Right	AOWL	-24.8639	1792.92	145.831	93.9475
60	AV01286	1792	Strike	Right	AOWL	-24.5506	1792.18	123.002	72.3041
61	AV01286	1793	Sight	Finback	AOWL	-21.1458	1793.46	86.0756	42.4
62	AV01286	1793	Strike	Humpback	AOWL	-24.1021	1793.49	89.5054	39.9193
63	AV01286	1793	Sight	Humpback	AOWL	-13.2563	1793.41	80.7903	53.2113
64	AV01286	1793	Sight	Humpback	AOWL	-14.3298	1793.42	81.2537	51.4665
65	AV01286	1793	Sight	Humpback	AOWL	-14.6481	1793.42	81.3946	50.9551
66	AV01286	1793	Sight	Humpback	AOWL	-21.1458	1793.46	86.0756	42.4
67	AV01286	1793	Sight	Humpback	AOWL	-21.4665	1793.46	86.4143	42.1034
68	AV01286	1793	Sight	Humpback	AOWL	-21.7023	1793.47	86.6398	41.8543
69	AV01286	1793	Sight	Humpback	AOWL	-22.9311	1793.48	87.9553	40.7004
70	AV01286	1793	Sight	Humpback	AOWL	-23.4226	1793.48	88.5498	40.3098
71	AV01286	1793	Sight	Humpback	AOWL	-24.334	1793.49	89.5993	39.535
72	AV01286	1793	Sight	Humpback	AOWL	-23.7774	1793.5	89.254	40.3127
73	AV01286	1793	Sight	Right	AOWL	-31.397	1793.09	147.897	82.9295
74	AV01286	1793	Sight	Right	AOWL	-31.1269	1793.78	131.031	67.2498
75	AV01286	1793	Strike	Right	AOWL	-24.6421	1793.52	91.211	40.5211
76	AV01286	1793	Strike	Right	AOWL	-24.6421	1793.52	91.373	40.6822
77	AV01286	1793	Strike	Right	AOWL	-24.6422	1793.55	92.9307	42.238
78	AV01286	1793	Strike	Right	AOWL	-24.6433	1793.67	107.503	56.8978
79	AV01286	1793	Strike	Right	AOWL	-24.6422	1793.53	91.7198	41.0274
80	AV01286	1793	Strike	Right	AOWL	-24.6423	1793.56	94.1198	43.4309
81	AV01286	1793	Strike	Right	AOWL	-24.6426	1793.57	95.454	44.7718
82	AV01286	1793	Strike	Right	AOWL	-24.6428	1793.61	99.814	49.1625
83	AV01286	1793	Strike	Right	AOWL	-24.643	1793.63	101.901	51.2647
84	AV01286	1793	Strike	Right	AOWL	-24.6431	1793.64	103.348	52.7211
85	AV01286	1793	Strike	Right	AOWL	-24.6431	1793.64	104.086	53.4634
86	AV01286	1793	Strike	Right	AOWL	-24.6433	1793.67	108.28	57.6783
87	AV01286	1793	Strike	Right	AOWL	-24.6434	1793.68	109.851	59.2536
88	AV08694	1797	Strike	Right	AOWL	14.296	1797.78	86.3142	113.218
89	AV08694	1797	Sight	Right	AOWL	23.1969	1797.83	90.2492	134.333
90	AV01642	1797	Strike	Right	AOWL	3.60134	1798	109.76	116.687
91	AV08694	1798	Strike	Right	AOWL	14.831	1798.83	94.2032	122.012
92	AV08694	1798	Strike	Right	AOWL	14.85	1798.83	93.7916	121.643
93	AV08694	1798	Strike	Right	AOWL	14.4997	1798.85	97.1319	124.254
94	AV08694	1798	Strike	Right	AOWL	14.69	1798.87	99.3758	126.808
95	AV08694	1798	Strike	Right	AOWL	14.7529	1798.87	99.9963	127.541
96	AV08694	1798	Sight	Right	AOWL	20.8779	1798.77	80.1142	119.833
97	AV08694	1798	Sight	Right	AOWL	19.3341	1798.79	84.8401	121.493
98	AV08694	1798	Sight	Right	AOWL	15.4058	1798.82	92.214	121.163
99	AV08694	1798	Sight	Right	AOWL	14.6386	1798.83	93.5317	120.975
100	AV08694	1798	Sight	Right	AOWL	14.9214	1798.84	95.7531	123.712
101	AV08694	1798	Sight	Right	AOWL	14.8882	1798.87	99.6214	127.432
102	AV09833	1800	Strike	Right	AOWL	15.1137	1800.17	84.4353	114.281
103	AV09833	1800	Strike	Right	AOWL	17.7702	1800.2	75.5775	110.719
104	AV09833	1800	Strike	Right	AOWL	18.4885	1800.22	71.8837	108.457
105	AV09833	1800	Strike	Right	AOWL	18.3865	1800.24	69.443	105.819
106	AV09833	1800	Strike	Right	AOWL	18.0174	1800.25	66.8423	102.486
107	AV09833	1800	Strike	Right	AOWL	17.8205	1800.26	65.1108	100.361
108	AV09833	1800	Strike	Right	AOWL	17.7015	1800.27	64.7655	99.779
109	AV09833	1800	Strike	Right	AOWL	17.9003	1800.26	65.5048	100.914
110	AV09833	1800	Sight	Right	AOWL	14.7893	1800.16	85.1664	114.364
111	AV09833	1800	Sight	Right	AOWL	17.1507	1800.2	76.6143	110.527
112	AV09833	1800	Sight	Right	AOWL	18.5278	1800.21	73.3807	110.028
113	AV09833	1800	Sight	Right	AOWL	18.3573	1800.23	70.9908	107.306
114	AV09833	1800	Sight	Right	AOWL	18.5786	1800.23	70.2644	107.019
115	AV09833	1800	Sight	Right	AOWL	18.5188	1800.24	68.8028	105.441
116	AV09833	1800	Sight	Right	AOWL	18.1776	1800.25	67.1623	103.124
117	AV09833	1800	Sight	Right	AOWL	17.9751	1800.26	66.3974	101.957
118	AV08113	1802	Sight	Right	AOWL	19.6445	1802.91	102.68	141.094
119	AV08113	1802	Sight	Right	AOWL	23.0949	1802.92	103.939	148.427
120	AV02590	1810	Sight	Right	AOWL	23.8156	1810.03	103.914	149.872
121	AV02590	1811	Sight	Right	AOWL	14.9626	1811.12	95.7746	125.094
122	AV09119	1815	Sight	Finback	AOWL	16.5932	1815.81	87.7395	120.254
123	AV09119	1815	Sight	Humpback	AOWL	6.81174	1815.65	73.9228	87.1768
124	AV09119	1815	Sight	Right	AOWL	16.6834	1815.77	82.1158	114.837
125	AV09119	1816	Sight	Finback	AOWL	21.1022	1816.05	101.03	142.438
126	AV09120	1816	Sight	Finback	AOWL	14.9846	1816.87	97.4347	126.7
127	AV09120	1816	Sight	Finback	AOWL	14.8922	1816.87	97.8299	126.909
128	AV05647	1817	Strike	Right	AOWL	16.4073	1817.74	77.3186	109.514
129	AV05647	1817	Strike	Right	AOWL	15.8384	1817.67	65.5119	96.5668
130	AV05647	1817	Strike	Right	AOWL	16.5509	1817.79	85.6323	118.08
131	AV05647	1817	Strike	Right	AOWL	17.517	1817.83	91.8728	126.187
132	AV05647	1817	Strike	Right	AOWL	17.7661	1817.84	93.4928	128.286
133	AV05647	1817	Strike	Right	AOWL	17.3976	1817.86	95.2857	129.334
134	AV05647	1817	Strike	Right	AOWL	17.2771	1817.86	96.5124	130.311
135	AV05647	1817	Strike	Right	AOWL	17.3085	1817.87	97.6325	131.483
136	AV05647	1817	Strike	Right	AOWL	17.6049	1817.89	99.6515	134.068
137	AV05647	1817	Strike	Right	AOWL	17.5875	1817.89	99.9815	134.361
138	AV05647	1817	Strike	Right	AOWL	16.1208	1817.71	72.4513	104.082
139	AV05647	1817	Strike	Right	AOWL	15.9016	1817.73	75.9113	107.106
140	AV05647	1817	Strike	Right	AOWL	15.7142	1817.73	76.5479	107.37
141	AV05647	1817	Sight	Right	AOWL	14.5588	1817.66	65.3932	93.9085
142	AV05647	1817	Sight	Right	AOWL	15.8857	1817.67	65.8876	97.0369
143	AV05647	1817	Sight	Right	AOWL	16.0592	1817.71	72.9767	104.485
144	AV09792	1818	Sight	Finback	AOWL	20.6949	1818.1	95.2882	135.984
145	AV09793	1818	Sight	Finback	AOWL	15.083	1818.85	95.4948	124.965
146	AV09793	1818	Sight	Finback	AOWL	15.402	1818.85	95.8782	125.971
147	AV09793	1818	Sight	Finback	AOWL	15.4781	1818.87	97.8184	128.043
148	AV09793	1818	Sight	Finback	AOWL	16.436	1818.97	107.22	139.257
149	AV05945	1818	Strike	Humpback	AOWL	14.2235	1818.23	74.259	102.377
150	AV09793	1818	Sight	Right	AOWL	15.402	1818.85	95.8782	125.971
151	AV05647	1818	Strike	Right	AOWL	20.7629	1818.19	75.8771	116.937
152	AV05647	1818	Strike	Right	AOWL	21.4902	1818.1	92.7906	135.111
153	AV05647	1818	Strike	Right	AOWL	21.5864	1818.14	84.6092	127.224
154	AV05647	1818	Strike	Right	AOWL	21.2467	1818.18	78.2765	120.276
155	AV05647	1818	Strike	Right	AOWL	20.1103	1818.21	73.1623	112.948
156	AV05647	1818	Strike	Right	AOWL	19.0658	1818.24	67.9358	105.668
157	AV05647	1818	Strike	Right	AOWL	20.0547	1818.23	69.5163	109.201
158	AV01138	1818	Sight	Right	AOWL	14.8569	1818.84	95.4409	124.434
159	AV05647	1818	Sight	Right	AOWL	21.5105	1818.09	95.0964	137.42
160	AV05945	1818	Strike	Right	AOWL	14.2232	1818.23	74.7255	102.842
161	AV05945	1818	Strike	Right	AOWL	14.2236	1818.24	73.7934	101.912
162	AV05945	1818	Strike	Right	AOWL	14.2247	1818.25	71.0195	99.1396
163	AV01488	1819	Sight	Finback	AOWL	12.5754	1819.21	80.091	104.93
164	AV01488	1819	Sight	Finback	AOWL	10.5948	1819.89	101.03	122.835
165	AV01488	1819	Sight	Finback	AOWL	8.09397	1819.93	105.87	122.543
166	AV01488	1819	Sight	Finback	AOWL	8.05161	1819.94	106.022	122.605
167	AV01488	1819	Sight	Finback	AOWL	8.06016	1819.96	106.771	123.328
168	AV01488	1819	Sight	Finback	AOWL	8.27202	1819.99	106.541	123.489
169	AV01488	1819	Sight	Finback	AOWL	8.30818	1819.99	106.462	123.477
170	AV01488	1819	Sight	Finback	AOWL	8.42024	1819.99	106.329	123.569
171	AV01488	1819	Sight	Finback	AOWL	8.42283	1819.99	106.249	123.488
172	AV09793	1819	Sight	Finback	AOWL	17.0289	1819.04	104.46	137.75
173	AV09793	1819	Sight	Finback	AOWL	19.3192	1819.24	67.1927	105.392
174	AV09793	1819	Sight	Finback	AOWL	14.9638	1819.77	82.7474	112.042
175	AV09793	1819	Strike	Humpback	AOWL	17.1371	1819.39	47.8747	81.6055
176	AV01488	1819	Sight	Humpback	AOWL	12.5754	1819.21	80.091	104.93
177	AV01488	1819	Sight	Humpback	AOWL	2.61695	1819.25	83.7262	88.9341
178	AV01488	1819	Sight	Humpback	AOWL	2.59372	1819.25	83.3723	88.5403
179	AV01488	1819	Sight	Humpback	AOWL	7.85972	1819.95	106.549	122.724
180	AV01488	1819	Sight	Humpback	AOWL	8.03539	1819.96	106.754	123.265
181	AV01488	1819	Sight	Humpback	AOWL	8.06016	1819.96	106.771	123.328
182	AV01488	1819	Sight	Humpback	AOWL	8.20867	1819.98	106.665	123.494
183	AV01488	1819	Sight	Humpback	AOWL	8.24012	1819.98	106.608	123.496
184	AV09793	1819	Sight	Right	AOWL	14.8129	1819.67	66.7897	95.795
185	AV13975	1819	Strike	Right	AOWL	16.2027	1819.76	80.1065	111.885
186	AV13975	1819	Strike	Right	AOWL	16.4841	1819.85	94.7554	127
187	AV13975	1819	Strike	Right	AOWL	16.0706	1819.87	97.6507	129.053
188	AV13975	1819	Strike	Right	AOWL	15.78	1819.74	78.1201	109.068
189	AV13975	1819	Strike	Right	AOWL	15.8053	1819.75	78.5716	109.567
190	AV13975	1819	Strike	Right	AOWL	15.9627	1819.79	84.9382	116.222
191	AV13975	1819	Strike	Right	AOWL	15.9728	1819.79	85.3936	116.694
192	AV13975	1819	Strike	Right	AOWL	16.031	1819.79	85.8114	117.225
193	AV13975	1819	Strike	Right	AOWL	15.9836	1819.8	86.2892	117.607
194	AV13975	1819	Strike	Right	AOWL	16.0542	1819.8	86.7163	118.171
195	AV13975	1819	Strike	Right	AOWL	16.0363	1819.81	88.0643	119.476
196	AV13975	1819	Strike	Right	AOWL	16.2616	1819.81	88.4142	120.268
197	AV13975	1819	Strike	Right	AOWL	15.9627	1819.87	97.3063	128.499
198	AV13975	1819	Strike	Right	AOWL	16.3663	1819.89	100.156	132.116
199	AV13975	1819	Strike	Right	AOWL	16.5043	1819.93	104.132	136.333
200	AV13975	1819	Strike	Right	AOWL	16.5325	1819.93	104.358	136.612
201	AV13975	1819	Strike	Right	AOWL	15.7728	1819.75	79.0546	109.986
202	AV13975	1819	Strike	Right	AOWL	16.2507	1819.78	83.4791	115.332
203	AV13975	1819	Strike	Right	AOWL	16.4732	1819.93	103.929	136.07
204	AV13975	1819	Sight	Right	AOWL	15.0182	1819.71	73.3569	102.798
205	AV13975	1819	Sight	Right	AOWL	15.8195	1819.74	77.6221	108.649
206	AV05945	1819	Strike	Right	AOWL	4.68095	1819.19	89.3343	98.5338
207	AV05945	1819	Strike	Right	AOWL	4.6816	1819.2	88.1281	97.3337
208	AV05945	1819	Strike	Right	AOWL	4.68399	1819.23	83.718	92.9378
209	AV01488	1820	Sight	Finback	AOWL	8.44782	1820	105.942	123.213
210	AV01488	1820	Sight	Finback	AOWL	8.50839	1820.03	104.535	121.871
211	AV01488	1820	Sight	Finback	AOWL	8.09683	1820.07	100.578	116.956
212	AV01488	1820	Sight	Finback	AOWL	8.31061	1820.08	99.825	116.631
213	AV01488	1820	Sight	Finback	AOWL	8.38262	1820.09	99.1523	116.095
214	AV01488	1820	Sight	Finback	AOWL	8.55175	1820.09	98.0674	115.341
215	AV01488	1820	Sight	Finback	AOWL	8.50037	1820.1	97.776	114.938
216	AV01488	1820	Sight	Finback	AOWL	8.56523	1820.17	87.3438	104.553
217	AV01488	1820	Sight	Finback	AOWL	7.60838	1820.24	79.3495	94.5522
218	AV01488	1820	Sight	Finback	AOWL	7.49214	1820.26	76.9553	91.9099
219	AV01488	1820	Sight	Finback	AOWL	7.40398	1820.27	76.3325	91.1078
220	AV01488	1820	Sight	Finback	AOWL	4.78435	1820.34	69.645	79.3638
221	AV01488	1820	Sight	Finback	AOWL	4.93451	1820.35	69.2219	79.2283
222	AV01488	1820	Sight	Finback	AOWL	4.11364	1820.41	64.5768	72.8592
223	AV01488	1820	Sight	Finback	AOWL	3.78317	1820.43	63.6808	71.3054
224	AV01488	1820	Sight	Finback	AOWL	3.29922	1820.44	63.7738	70.3951
225	AV01488	1820	Sight	Finback	AOWL	4.12176	1820.55	65.92	73.9793
226	AV01488	1820	Sight	Finback	AOWL	4.33245	1820.58	67.6053	76.0657
227	AV01488	1820	Sight	Finback	AOWL	4.79024	1820.6	69.554	79.2022
228	AV01488	1820	Sight	Finback	AOWL	4.5475	1820.61	70.0922	79.2579
229	AV01488	1820	Sight	Finback	AOWL	4.56358	1820.61	70.3806	79.5981
230	AV01488	1820	Sight	Finback	AOWL	2.98097	1820.64	75.7122	81.8381
231	AV01488	1820	Sight	Finback	AOWL	1.03896	1820.69	83.447	85.5198
232	AV01488	1820	Sight	Finback	AOWL	0.122916	1820.71	87.203	87.2945
233	AV01488	1820	Sight	Finback	AOWL	8.89002	1820.76	87.2571	103.949
234	AV01488	1820	Sight	Finback	AOWL	9.77461	1820.77	88.0402	107.023
235	AV01488	1820	Sight	Finback	AOWL	9.11816	1820.78	89.3619	107.045
236	AV01488	1820	Sight	Finback	AOWL	8.1603	1820.78	90.5603	106.342
237	AV01488	1820	Sight	Finback	AOWL	5.56144	1820.79	93.5528	104.177
238	AV01488	1820	Sight	Finback	AOWL	1.57576	1820.82	100.71	103.472
239	AV01488	1820	Sight	Finback	AOWL	1.34473	1820.82	101.189	103.504
240	AV01488	1820	Sight	Finback	AOWL	1.33781	1820.83	102.178	104.486
241	AV01488	1820	Sight	Finback	AOWL	1.35172	1820.83	102.491	104.828
242	AV01488	1820	Sight	Finback	AOWL	1.37446	1820.83	102.799	105.182
243	AV01488	1820	Sight	Finback	AOWL	1.57619	1820.84	103.33	106.105
244	AV01488	1820	Sight	Finback	AOWL	1.54778	1820.84	103.96	106.685
245	AV01488	1820	Sight	Finback	AOWL	1.77226	1820.85	104.758	107.921
246	AV01488	1820	Sight	Finback	AOWL	2.2626	1820.91	109.658	113.921
247	AV01488	1820	Sight	Finback	AOWL	4.97856	1820.97	108.639	118.502
248	AV01488	1820	Sight	Finback	AOWL	4.44764	1820.98	109.12	117.914
249	AV01488	1820	Sight	Finback	AOWL	4.3171	1820.99	109.125	117.675
250	AV01488	1820	Sight	Finback	AOWL	4.05713	1820.99	109.341	117.333
251	AV09795	1820	Sight	Finback	AOWL	-31.9348	1820.54	93.8587	30.546
252	AV09795	1820	Sight	Finback	AOWL	9.9161	1820.66	71.0254	90.3606
253	AV09795	1820	Sight	Finback	AOWL	13.3937	1820.69	71.7754	97.9678
254	AV01488	1820	Sight	Humpback	AOWL	8.46173	1820.03	104.749	121.997
255	AV01488	1820	Sight	Humpback	AOWL	8.50839	1820.03	104.535	121.871
256	AV01488	1820	Sight	Humpback	AOWL	8.48668	1820.03	104.353	121.638
257	AV01488	1820	Sight	Humpback	AOWL	8.09683	1820.07	100.578	116.956
258	AV01488	1820	Sight	Humpback	AOWL	8.55175	1820.09	98.0674	115.341
259	AV01488	1820	Sight	Humpback	AOWL	8.56523	1820.17	87.3438	104.553
260	AV01488	1820	Sight	Humpback	AOWL	8.88809	1820.19	85.5249	103.389
261	AV01488	1820	Sight	Humpback	AOWL	2.85691	1820.45	64.0068	69.704
262	AV01488	1820	Sight	Humpback	AOWL	3.96919	1820.52	63.9021	71.7322
263	AV01488	1820	Sight	Humpback	AOWL	4.02364	1820.52	63.9884	71.9271
264	AV01488	1820	Sight	Humpback	AOWL	4.12029	1820.54	64.7183	72.8242
265	AV01488	1820	Sight	Humpback	AOWL	4.09446	1820.54	64.9331	72.9748
266	AV01488	1820	Sight	Humpback	AOWL	2.21592	1820.81	98.8673	102.879
267	AV01488	1820	Sight	Humpback	AOWL	1.57576	1820.82	100.71	103.472
268	AV01488	1820	Sight	Humpback	AOWL	1.34473	1820.82	101.189	103.504
269	AV01488	1820	Sight	Humpback	AOWL	1.33781	1820.83	102.178	104.486
270	AV01488	1820	Sight	Humpback	AOWL	1.35172	1820.83	102.491	104.828
271	AV01488	1820	Sight	Humpback	AOWL	1.37446	1820.83	102.799	105.182
272	AV01488	1820	Sight	Humpback	AOWL	1.57619	1820.84	103.33	106.105
273	AV01488	1820	Sight	Humpback	AOWL	1.54778	1820.84	103.96	106.685
274	AV01488	1820	Sight	Humpback	AOWL	2.43419	1820.92	109.649	114.308
275	AV09795	1820	Sight	Right	AOWL	16.0076	1820.86	97.138	128.413
276	AV01488	1821	Sight	Finback	AOWL	24.5189	1821.29	51.3908	99.8647
277	AV09399	1821	Sight	Finback	AOWL	13.6777	1821.82	92.6406	119.343
278	AV09399	1821	Sight	Finback	AOWL	13.6777	1821.82	92.6406	119.343
279	AV09399	1821	Sight	Finback	AOWL	14.4285	1821.88	99.7783	127.913
280	AV09399	1821	Sight	Finback	AOWL	15.5248	1821.93	104.926	135.182
281	AV09399	1821	Sight	Finback	AOWL	15.5969	1821.93	105.106	135.503
282	AV09399	1821	Sight	Finback	AOWL	15.8221	1821.95	105.771	136.612
283	AV09399	1821	Sight	Finback	AOWL	18.5393	1821.97	105.28	141.515
284	AV09399	1821	Sight	Finback	AOWL	20.1157	1821.98	105.198	144.552
285	AV00455	1821	Sight	Humpback	AOWL	7.89733	1821.78	89.3981	104.773
286	AV00455	1821	Sight	Humpback	AOWL	8.56692	1821.78	89.9713	106.664
287	AV00455	1821	Sight	Humpback	AOWL	21.1776	1821.9	102.78	143.474
288	AV00455	1821	Sight	Humpback	AOWL	12.9765	1821.92	105.523	130.719
289	AV09399	1821	Sight	Humpback	AOWL	12.6267	1821.8	90.2735	114.919
290	AV00455	1821	Sight	Right	AOWL	16.4191	1821.81	88.4712	120.639
291	AV00455	1821	Sight	Right	AOWL	17.7622	1821.81	88.1717	123
292	AV00455	1821	Sight	Right	AOWL	21.1776	1821.9	102.78	143.474
293	AV00455	1821	Sight	Right	AOWL	19.4833	1821.9	103.094	140.452
294	AV00455	1821	Sight	Right	AOWL	18.4291	1821.91	102.965	138.271
295	AV01488	1821	Sight	Right	AOWL	23.2146	1821.29	52.4699	98.3435
296	AV09399	1821	Sight	Right	AOWL	13.0886	1821.81	90.4872	116.039
297	AV09399	1821	Sight	Right	AOWL	13.481	1821.81	91.1424	117.463
298	AV09399	1821	Sight	Right	AOWL	13.7507	1821.83	93.0125	119.857
299	AV09399	1821	Sight	Right	AOWL	16.2441	1821.95	106.194	137.857
300	AV09399	1821	Sight	Right	AOWL	16.5156	1821.96	106.559	138.754
301	AV09399	1821	Sight	Right	AOWL	21.5229	1821.99	105.176	147.317
302	AV05597	1821	Strike	Right	AOWL	15.8884	1821.78	84.3057	115.445
303	AV05597	1821	Strike	Right	AOWL	16.1401	1821.8	86.474	118.098
304	AV05597	1821	Strike	Right	AOWL	15.7146	1821.84	94.3177	125.039
305	AV05597	1821	Strike	Right	AOWL	15.898	1821.74	76.8654	108.049
306	AV05597	1821	Strike	Right	AOWL	15.8565	1821.74	77.3708	108.47
307	AV05597	1821	Strike	Right	AOWL	15.8895	1821.74	78.2659	109.43
308	AV05597	1821	Strike	Right	AOWL	15.5079	1821.76	80.8895	111.292
309	AV05597	1821	Strike	Right	AOWL	15.2776	1821.76	81.9777	111.921
310	AV05597	1821	Strike	Right	AOWL	15.3518	1821.77	82.381	112.469
311	AV05597	1821	Strike	Right	AOWL	15.9655	1821.77	82.8457	114.146
312	AV05597	1821	Strike	Right	AOWL	15.6651	1821.83	91.5707	122.224
313	AV05597	1821	Strike	Right	AOWL	15.8679	1821.84	94.6902	125.711
314	AV05597	1821	Strike	Right	AOWL	16.2711	1821.86	95.9289	127.741
315	AV05597	1821	Strike	Right	AOWL	16.5094	1821.87	98.1727	130.434
316	AV05597	1821	Strike	Right	AOWL	16.6514	1821.88	99.211	131.743
317	AV05597	1821	Strike	Right	AOWL	16.4493	1821.88	99.4936	131.626
318	AV05597	1821	Strike	Right	AOWL	16.757	1821.92	103.42	136.122
319	AV05597	1821	Strike	Right	AOWL	16.8676	1821.92	103.617	136.537
320	AV05597	1821	Strike	Right	AOWL	16.7713	1821.92	103.824	136.553
321	AV05597	1821	Strike	Right	AOWL	16.8396	1821.93	104.044	136.905
322	AV05597	1821	Strike	Right	AOWL	17.3936	1821.96	106.489	140.418
323	AV05597	1821	Strike	Right	AOWL	15.3329	1821.75	79.1912	109.253
324	AV05597	1821	Strike	Right	AOWL	15.4396	1821.76	81.3985	111.664
325	AV05597	1821	Strike	Right	AOWL	15.7785	1821.94	104.905	135.68
326	AV05597	1821	Strike	Right	AOWL	15.8255	1821.94	105.016	135.884
327	AV05597	1821	Strike	Right	AOWL	17.3882	1821.97	106.992	140.914
328	AV05597	1821	Strike	Right	AOWL	17.4156	1821.98	106.906	140.889
329	AV05597	1821	Sight	Right	AOWL	15.6489	1821.77	82.6219	113.296
330	AV05597	1821	Sight	Right	AOWL	16.0823	1821.79	86.0481	117.56
331	AV05597	1821	Sight	Right	AOWL	16.1083	1821.8	87.4191	118.974
332	AV05597	1821	Sight	Right	AOWL	15.721	1821.81	89.7157	120.479
333	AV05597	1821	Sight	Right	AOWL	15.5105	1821.83	92.0505	122.395
334	AV05597	1821	Sight	Right	AOWL	15.2855	1821.84	93.9946	123.874
335	AV05597	1821	Sight	Right	AOWL	16.1995	1821.86	96.4091	128.074
336	AV05597	1821	Sight	Right	AOWL	16.2929	1821.86	96.7569	128.603
337	AV05597	1821	Sight	Right	AOWL	15.9684	1821.89	101.367	132.525
338	AV05597	1821	Sight	Right	AOWL	16.7389	1821.91	103.084	135.755
339	AV05597	1821	Sight	Right	AOWL	17.2783	1821.97	106.725	140.434
340	AV05597	1821	Sight	Right	AOWL	17.3675	1821.98	106.917	140.801
341	AV05597	1821	Sight	Right	AOWL	17.4669	1821.98	106.874	140.958
342	AV05597	1821	Sight	Right	AOWL	17.3685	1821.99	106.837	140.731
343	AV05597	1821	Sight	Right	AOWL	17.2338	1822	106.388	140.032
344	AV12639	1821	Sight	Right	AOWL	17.4502	1821.81	88.2634	122.476
345	AV05597	1821	Strike	Right	AOWL	16.1455	1821.8	86.4707	118.105
346	AV05597	1821	Strike	Right	AOWL	15.7069	1821.84	94.3161	125.022
347	AV05597	1821	Strike	Right	AOWL	16.757	1821.92	103.42	136.122
348	AV05597	1821	Strike	Right	AOWL	16.7713	1821.92	103.824	136.553
349	AV05597	1821	Strike	Right	AOWL	15.898	1821.74	76.8654	108.049
350	AV05597	1821	Strike	Right	AOWL	15.8623	1821.74	77.365	108.476
351	AV05597	1821	Strike	Right	AOWL	15.8895	1821.74	78.2659	109.43
352	AV05597	1821	Strike	Right	AOWL	15.5079	1821.76	80.8895	111.292
353	AV05597	1821	Strike	Right	AOWL	15.2653	1821.76	81.9899	111.909
354	AV05597	1821	Strike	Right	AOWL	15.3652	1821.77	82.3677	112.483
355	AV05597	1821	Strike	Right	AOWL	15.9709	1821.77	82.8417	114.153
356	AV05597	1821	Strike	Right	AOWL	15.8528	1821.78	84.3271	115.396
357	AV05597	1821	Strike	Right	AOWL	15.6651	1821.83	91.5707	122.224
358	AV05597	1821	Strike	Right	AOWL	16.2711	1821.86	95.9289	127.741
359	AV05597	1821	Strike	Right	AOWL	16.3042	1821.86	97.1388	129.004
360	AV05597	1821	Strike	Right	AOWL	16.5094	1821.87	98.1727	130.434
361	AV05597	1821	Strike	Right	AOWL	16.7267	1821.88	99.2409	131.92
362	AV05597	1821	Strike	Right	AOWL	16.4493	1821.88	99.4936	131.626
363	AV05597	1821	Strike	Right	AOWL	16.8478	1821.92	103.642	136.522
364	AV05597	1821	Strike	Right	AOWL	16.8959	1821.93	103.993	136.967
365	AV05597	1821	Strike	Right	AOWL	16.8845	1821.95	105.628	138.566
366	AV05597	1821	Strike	Right	AOWL	17.0689	1821.95	105.778	139.079
367	AV05597	1821	Strike	Right	AOWL	17.3996	1821.96	106.489	140.43
368	AV05597	1821	Strike	Right	AOWL	17.2847	1821.97	107.02	140.731
369	AV05597	1821	Strike	Right	AOWL	17.4532	1821.98	106.875	140.933
370	AV00455	1822	Sight	Finback	AOWL	6.29919	1822.37	60.2604	73.3092
371	AV00455	1822	Sight	Finback	AOWL	6.15696	1822.37	60.0193	72.7913
372	AV00455	1822	Sight	Finback	AOWL	6.01489	1822.38	59.7816	72.2774
373	AV00455	1822	Sight	Finback	AOWL	5.19912	1822.51	56.5729	67.603
374	AV00455	1822	Sight	Finback	AOWL	5.52244	1822.52	56.3821	68.0828
375	AV00455	1822	Sight	Finback	AOWL	5.33633	1822.53	57.0433	68.3773
376	AV00455	1822	Sight	Finback	AOWL	5.23472	1822.53	57.7234	68.84
377	AV00455	1822	Sight	Finback	AOWL	5.50782	1822.54	57.1583	68.8573
378	AV00455	1822	Sight	Finback	AOWL	11.0841	1822.84	94.7522	117.554
379	AV00455	1822	Sight	Finback	AOWL	11.2618	1822.87	99.3936	122.579
380	AV09015	1822	Sight	Finback	AOWL	10.6201	1822.7	76.7082	97.4429
381	AV09015	1822	Sight	Finback	AOWL	13.838	1822.72	76.46	103.541
382	AV09015	1822	Sight	Finback	AOWL	14.2752	1822.73	76.4876	104.437
383	AV09015	1822	Sight	Finback	AOWL	15.1745	1822.73	76.9852	106.727
384	AV09015	1822	Sight	Finback	AOWL	16.7995	1822.8	86.8552	119.783
385	AV09015	1822	Sight	Finback	AOWL	16.4162	1822.81	87.9967	120.159
386	AV09015	1822	Sight	Finback	AOWL	16.3422	1822.86	97.016	128.958
387	AV09015	1822	Sight	Finback	AOWL	15.7838	1822.89	101.572	132.352
388	AV09015	1822	Sight	Finback	AOWL	14.8448	1822.93	106.64	135.51
389	AV09015	1822	Sight	Finback	AOWL	15.1091	1822.97	107.817	137.22
390	AV09015	1822	Sight	Finback	AOWL	15.3954	1822.99	107.87	137.845
391	AV09399	1822	Sight	Finback	AOWL	14.0985	1822.13	91.4123	119.172
392	AV09399	1822	Sight	Finback	AOWL	9.4493	1822.18	86.6699	105.303
393	AV09399	1822	Sight	Finback	AOWL	2.74381	1822.23	85.6136	91.1426
394	AV09399	1822	Sight	Finback	AOWL	3.93925	1822.24	83.2968	91.2276
395	AV09399	1822	Sight	Finback	AOWL	4.04187	1822.49	56.1949	64.9383
396	AV09399	1822	Sight	Finback	AOWL	3.74128	1822.51	56.4838	64.655
397	AV09399	1822	Sight	Finback	AOWL	3.78277	1822.52	57.4582	65.7044
398	AV09399	1822	Sight	Finback	AOWL	5.45836	1822.6	63.087	74.6823
399	AV09399	1822	Sight	Finback	AOWL	4.20669	1822.64	71.5559	80.6064
400	AV11187	1822	Sight	Finback	AOWL	-30.7345	1822.53	89.8891	29.0643
401	AV11187	1822	Sight	Finback	AOWL	-33.7151	1822.54	94.2156	27.3946
402	AV11187	1822	Sight	Finback	AOWL	-17.8423	1822.64	96.1078	60.4767
403	AV11187	1822	Sight	Finback	AOWL	-24.5253	1822.8	123.973	74.7509
404	AV11187	1822	Sight	Finback	AOWL	-24.5254	1822.86	131.119	81.9199
405	AV11187	1822	Sight	Finback	AOWL	-24.5258	1822.96	137.818	88.7315
406	AV09399	1822	Sight	Humpback	AOWL	14.0985	1822.13	91.4123	119.172
407	AV11187	1822	Sight	Humpback	AOWL	-24.5449	1822.69	109.421	60.1615
408	AV11187	1822	Sight	Humpback	AOWL	-24.5251	1822.71	112.942	63.719
409	AV09015	1822	Strike	Right	AOWL	16.4734	1822.81	88.466	120.736
410	AV09015	1822	Sight	Right	AOWL	15.3115	1822.74	78.6554	108.674
411	AV09015	1822	Sight	Right	AOWL	15.1825	1822.75	79.2183	108.981
412	AV09015	1822	Sight	Right	AOWL	16.4734	1822.81	88.466	120.736
413	AV09015	1822	Sight	Right	AOWL	15.7838	1822.89	101.572	132.352
414	AV05598	1822	Strike	Right	AOWL	16.8302	1822.83	90.9945	123.952
415	AV05598	1822	Strike	Right	AOWL	16.491	1822.88	98.9491	131.172
416	AV05598	1822	Strike	Right	AOWL	15.1326	1822.93	106.086	135.534
417	AV07019	1822	Strike	Right	AOWL	16.2951	1822.71	72.6393	104.616
418	AV05597	1822	Strike	Right	AOWL	17.399	1822.01	105.725	139.715
419	AV05597	1822	Strike	Right	AOWL	17.354	1822.01	105.464	139.373
420	AV05597	1822	Strike	Right	AOWL	17.4688	1822.03	104.601	138.757
421	AV05597	1822	Strike	Right	AOWL	17.547	1822.04	103.929	138.254
422	AV05598	1822	Strike	Right	AOWL	15.4608	1822.71	72.124	102.445
423	AV05598	1822	Strike	Right	AOWL	15.5547	1822.71	72.4792	102.986
424	AV05598	1822	Strike	Right	AOWL	15.7551	1822.78	83.348	114.23
425	AV05598	1822	Strike	Right	AOWL	16.2657	1822.78	84.3959	116.282
426	AV05598	1822	Strike	Right	AOWL	16.4894	1822.88	99.2546	131.472
427	AV05598	1822	Strike	Right	AOWL	15.6728	1822.91	103.271	133.819
428	AV05598	1822	Strike	Right	AOWL	15.4739	1822.91	104.023	134.174
429	AV05598	1822	Strike	Right	AOWL	15.3368	1822.94	106.78	136.624
430	AV05598	1822	Strike	Right	AOWL	14.9615	1822.94	107.272	136.369
431	AV05598	1822	Strike	Right	AOWL	15.2715	1822.96	107.26	136.982
432	AV05598	1822	Strike	Right	AOWL	15.496	1822.98	107.794	137.966
433	AV07019	1822	Strike	Right	AOWL	15.581	1822.71	72.4562	103.017
434	AV07019	1822	Strike	Right	AOWL	16.4569	1822.72	72.9432	105.242
435	AV07019	1822	Strike	Right	AOWL	16.3697	1822.79	85.4062	117.485
436	AV07019	1822	Strike	Right	AOWL	16.2415	1822.8	87.3458	119.16
437	AV07019	1822	Strike	Right	AOWL	16.1617	1822.81	88.3186	119.968
438	AV07019	1822	Strike	Right	AOWL	15.6743	1822.84	93.8001	124.446
439	AV07019	1822	Strike	Right	AOWL	15.455	1822.84	94.7022	124.908
440	AV07019	1822	Strike	Right	AOWL	15.7734	1822.87	98.7126	129.507
441	AV05598	1822	Strike	Right	AOWL	16.0449	1822.71	72.4276	103.905
442	AV05598	1822	Strike	Right	AOWL	15.5455	1822.73	76.6183	107.102
443	AV05598	1822	Strike	Right	AOWL	15.5371	1822.77	82.5718	113.027
444	AV05598	1822	Strike	Right	AOWL	15.6079	1822.9	103.061	133.481
445	AV05598	1822	Strike	Right	AOWL	15.6756	1822.91	103.558	134.108
446	AV05598	1822	Strike	Right	AOWL	15.5511	1822.91	103.805	134.109
447	AV05598	1822	Strike	Right	AOWL	15.2037	1822.94	106.674	136.254
448	AV05598	1822	Strike	Right	AOWL	15.0983	1822.94	107.061	136.43
449	AV05598	1822	Strike	Right	AOWL	14.9669	1822.95	107.588	136.694
450	AV05597	1822	Sight	Right	AOWL	17.4332	1822	106.262	140.303
451	AV05597	1822	Sight	Right	AOWL	17.5162	1822.02	105.33	139.561
452	AV05597	1822	Sight	Right	AOWL	17.4192	1822.03	104.541	138.602
453	AV05597	1822	Sight	Right	AOWL	17.5665	1822.03	103.983	138.346
454	AV05598	1822	Sight	Right	AOWL	15.2387	1822.7	71.0098	100.888
455	AV05598	1822	Sight	Right	AOWL	15.3526	1822.7	71.3342	101.439
456	AV05598	1822	Sight	Right	AOWL	15.3525	1822.7	71.7908	101.898
457	AV05598	1822	Sight	Right	AOWL	15.7615	1822.77	81.9475	112.849
458	AV05598	1822	Sight	Right	AOWL	15.707	1822.77	82.9143	113.704
459	AV05598	1822	Sight	Right	AOWL	16.9144	1822.82	89.8941	123.031
460	AV05598	1822	Sight	Right	AOWL	17.1364	1822.82	90.2269	123.801
461	AV05598	1822	Sight	Right	AOWL	15.5545	1822.92	104.439	134.747
462	AV05598	1822	Sight	Right	AOWL	14.9743	1822.95	107.261	136.388
463	AV05598	1822	Sight	Right	AOWL	15.4472	1822.98	107.924	137.994
464	AV07019	1822	Sight	Right	AOWL	15.5163	1822.69	69.3659	99.7932
465	AV07019	1822	Sight	Right	AOWL	16.3993	1822.78	83.928	116.076
466	AV07019	1822	Sight	Right	AOWL	16.2908	1822.78	84.515	116.443
467	AV07019	1822	Sight	Right	AOWL	16.4497	1822.8	86.2717	118.505
468	AV07019	1822	Sight	Right	AOWL	16.1733	1822.82	90.2471	121.903
469	AV07019	1822	Sight	Right	AOWL	16.298	1822.82	90.589	122.49
470	AV07019	1822	Sight	Right	AOWL	15.2008	1822.85	95.6992	125.393
471	AV07019	1822	Sight	Right	AOWL	15.3821	1822.85	96.1046	126.151
472	AV07019	1822	Sight	Right	AOWL	15.2819	1822.86	96.8107	126.656
473	AV07019	1822	Sight	Right	AOWL	15.9149	1822.86	97.546	128.63
474	AV07019	1822	Sight	Right	AOWL	15.5748	1822.87	97.9742	128.384
475	AV07019	1822	Sight	Right	AOWL	16.0575	1822.88	99.3553	130.704
476	AV07019	1822	Sight	Right	AOWL	15.3648	1822.91	104.27	134.194
477	AV07019	1822	Sight	Right	AOWL	14.596	1822.93	106.357	134.735
478	AV07019	1822	Sight	Right	AOWL	15.0401	1822.97	108.4	137.653
479	AV07019	1822	Sight	Right	AOWL	14.9281	1822.98	108.385	137.419
480	AV15481	1822	Sight	Right	AOWL	2.00239	1822.36	66.2119	70.6432
481	AV15481	1822	Sight	Right	AOWL	1.88017	1822.47	58.5425	62.9141
482	AV05597	1822	Strike	Right	AOWL	17.2581	1822	106.13	139.83
483	AV05597	1822	Strike	Right	AOWL	17.402	1822.01	105.728	139.724
484	AV05597	1822	Strike	Right	AOWL	17.4289	1822.01	105.548	139.602
485	AV05597	1822	Strike	Right	AOWL	17.4688	1822.03	104.601	138.757
486	AV05597	1822	Strike	Right	AOWL	17.4037	1822.03	104.033	138.074
487	AV00455	1823	Sight	Finback	AOWL	3.46905	1823.09	102.953	109.878
488	AV00455	1823	Sight	Finback	AOWL	3.69337	1823.09	102.427	109.656
489	AV00455	1823	Sight	Finback	AOWL	3.62493	1823.23	84.4763	91.5608
490	AV00455	1823	Sight	Finback	AOWL	4.4791	1823.24	82.8778	91.6926
491	AV09399	1823	Sight	Finback	AOWL	11.0203	1823.05	102.363	124.885
492	AV09399	1823	Sight	Finback	AOWL	9.4987	1823.13	92.3144	111.532
493	AV09399	1823	Sight	Finback	AOWL	5.91944	1823.4	58.8711	71.1415
494	AV09399	1823	Sight	Finback	AOWL	4.19221	1823.44	57.8879	66.7982
495	AV09399	1823	Sight	Finback	AOWL	2.67595	1823.53	58.5497	64.6024
496	AV09399	1823	Sight	Finback	AOWL	2.49931	1823.53	58.3092	64.0278
497	AV09399	1823	Sight	Finback	AOWL	2.14172	1823.56	62.177	67.1451
498	AV09399	1823	Sight	Finback	AOWL	2.30798	1823.61	68.7584	74.026
499	AV09399	1823	Sight	Finback	AOWL	11.3533	1823.93	105.167	128.556
500	AV09399	1823	Sight	Finback	AOWL	10.3206	1823.95	105.57	126.798
501	AV09399	1823	Sight	Finback	AOWL	10.1457	1823.95	105.684	126.549
502	AV09399	1823	Sight	Finback	AOWL	9.46068	1823.96	105.79	125.2
503	AV11187	1823	Sight	Finback	AOWL	-24.5259	1823.01	137.105	88.1092
504	AV11187	1823	Sight	Finback	AOWL	-24.5261	1823.08	131.434	82.5231
505	AV11187	1823	Sight	Finback	AOWL	-24.5266	1823.23	112.773	63.9025
506	AV11187	1823	Sight	Finback	AOWL	-25.048	1823.29	105.266	55.306
507	AV13262	1823	Sight	Finback	AOWL	15.9411	1823.87	97.3384	128.488
508	AV13262	1823	Sight	Finback	AOWL	15.6414	1823.88	99.2788	129.818
509	AV13262	1823	Sight	Finback	AOWL	15.3425	1823.88	100.115	130.055
510	AV13262	1823	Sight	Finback	AOWL	16.9194	1823.91	102.291	135.322
511	AV13262	1823	Sight	Finback	AOWL	16.5212	1823.92	103.641	135.87
512	AV13262	1823	Sight	Finback	AOWL	15.427	1823.93	105.222	135.27
513	AV13262	1823	Sight	Finback	AOWL	15.8188	1823.95	106.733	137.542
514	AV13262	1823	Sight	Finback	AOWL	15.4554	1823.97	107.362	137.458
515	AV09399	1823	Sight	Humpback	AOWL	9.4747	1823.15	90.3927	109.538
516	AV11187	1823	Sight	Humpback	AOWL	-25.048	1823.29	105.266	55.306
517	AV11187	1823	Sight	Humpback	AOWL	0.28234	1823.39	68.4916	69.4442
518	AV13262	1823	Sight	Humpback	AOWL	6.84261	1823.81	94.5514	107.829
519	AV13262	1823	Sight	Humpback	AOWL	8.88771	1823.81	93.7329	111.034
520	AV13262	1823	Sight	Humpback	AOWL	15.9411	1823.87	97.3384	128.488
521	AV13262	1823	Strike	Right	AOWL	15.4741	1823.84	94.1164	124.367
522	AV13262	1823	Strike	Right	AOWL	15.4742	1823.84	94.524	124.772
523	AV13262	1823	Strike	Right	AOWL	15.9411	1823.87	97.3384	128.488
524	AV13262	1823	Strike	Right	AOWL	16.7987	1823.91	102.565	135.356
525	AV13262	1823	Strike	Right	AOWL	16.7281	1823.91	102.897	135.544
526	AV13262	1823	Strike	Right	AOWL	15.427	1823.93	105.222	135.27
527	AV13262	1823	Strike	Right	AOWL	15.3088	1823.93	105.529	135.339
528	AV13262	1823	Strike	Right	AOWL	14.436	1823.93	106.747	134.806
529	AV13262	1823	Strike	Right	AOWL	15.7506	1823.95	106.61	137.284
530	AV13262	1823	Strike	Right	AOWL	15.5903	1823.96	106.972	137.336
531	AV13262	1823	Strike	Right	AOWL	16.1855	1823.99	106.68	138.245
532	AV13262	1823	Strike	Right	AOWL	15.8552	1823.99	106.46	137.384
533	AV09399	1823	Sight	Right	AOWL	10.9299	1823.11	95.0521	117.272
534	AV13262	1823	Sight	Right	AOWL	15.6414	1823.88	99.2788	129.818
535	AV13262	1823	Sight	Right	AOWL	16.9194	1823.91	102.291	135.322
536	AV13262	1823	Sight	Right	AOWL	16.4728	1823.92	103.943	136.078
537	AV13262	1823	Sight	Right	AOWL	16.4728	1823.92	103.943	136.078
538	AV13262	1823	Sight	Right	AOWL	16.3337	1823.93	104.197	136.056
539	AV13262	1823	Sight	Right	AOWL	15.427	1823.93	105.222	135.27
540	AV05598	1823	Strike	Right	AOWL	16.1753	1823.04	104.362	135.973
541	AV05598	1823	Strike	Right	AOWL	16.1266	1823.04	104.146	135.666
542	AV05598	1823	Strike	Right	AOWL	15.0553	1823.05	103.718	133.128
543	AV05598	1823	Strike	Right	AOWL	15.0267	1823.06	103.396	132.757
544	AV05598	1823	Strike	Right	AOWL	15.0365	1823.06	102.799	132.19
545	AV05598	1823	Strike	Right	AOWL	15.1341	1823.08	100.386	130.012
546	AV05598	1823	Strike	Right	AOWL	14.7846	1823.1	98.0007	126.969
547	AV07019	1823	Strike	Right	AOWL	15.488	1823.03	105.021	135.261
548	AV07019	1823	Strike	Right	AOWL	13.5532	1823.05	105.691	132.083
549	AV07019	1823	Strike	Right	AOWL	13.4737	1823.06	105.586	131.821
550	AV07019	1823	Strike	Right	AOWL	14.0003	1823.08	102.301	129.639
551	AV07019	1823	Strike	Right	AOWL	13.9607	1823.08	101.765	129.037
552	AV05598	1823	Strike	Right	AOWL	16.1591	1823.03	104.567	136.142
553	AV05598	1823	Strike	Right	AOWL	15.2385	1823.05	103.84	133.61
554	AV07019	1823	Strike	Right	AOWL	15.5775	1823.04	104.47	134.899
555	AV07019	1823	Strike	Right	AOWL	13.5443	1823.06	104.995	131.384
556	AV05598	1823	Sight	Right	AOWL	15.3857	1823.01	107.783	137.747
557	AV05598	1823	Sight	Right	AOWL	15.9812	1823.03	105.301	136.506
558	AV05598	1823	Sight	Right	AOWL	15.1669	1823.13	92.7035	122.501
559	AV07019	1823	Sight	Right	AOWL	15.0648	1823.01	107.205	136.553
560	AV07019	1823	Sight	Right	AOWL	15.3608	1823.02	106.433	136.385
561	AV07019	1823	Sight	Right	AOWL	15.3687	1823.03	105.997	135.977
562	AV07019	1823	Sight	Right	AOWL	15.5381	1823.03	105.66	135.983
563	AV07019	1823	Sight	Right	AOWL	15.6207	1823.04	103.988	134.512
564	AV07019	1823	Sight	Right	AOWL	15.4853	1823.05	103.842	134.101
565	AV07019	1823	Sight	Right	AOWL	13.1663	1823.05	105.876	131.505
566	AV07019	1823	Sight	Right	AOWL	13.906	1823.07	103.909	131.031
567	AV07019	1823	Sight	Right	AOWL	13.9879	1823.07	103.023	130.325
568	AV07019	1823	Sight	Right	AOWL	14.3824	1823.1	98.1305	126.295
569	AV01968	1823	Strike	Right	AOWL	19.419	1823.17	80.0184	118.404
570	AV01968	1823	Strike	Right	AOWL	20.1421	1823.2	73.7575	113.606
571	AV01968	1823	Strike	Right	AOWL	20.4411	1823.21	72.4472	112.891
572	AV01968	1823	Strike	Right	AOWL	20.492	1823.21	71.8693	112.415
573	AV01968	1823	Strike	Right	AOWL	19.4783	1823.3	57.3011	95.8233
574	AV01968	1823	Strike	Right	AOWL	18.9272	1823.33	53.1607	90.5531
575	AV01968	1823	Strike	Right	AOWL	18.9274	1823.33	52.7396	90.128
576	AV01968	1823	Strike	Right	AOWL	15.185	1823.76	81.0218	110.775
577	AV01968	1823	Strike	Right	AOWL	15.626	1823.82	90.4216	120.994
578	AV01968	1823	Strike	Right	AOWL	15.7138	1823.84	94.3675	125.08
579	AV01968	1823	Strike	Right	AOWL	15.5255	1823.85	95.3047	125.636
580	AV01968	1823	Strike	Right	AOWL	14.2323	1823.88	102.129	129.821
581	AV01968	1823	Strike	Right	AOWL	14.3354	1823.93	106.171	134.046
582	AV01968	1823	Strike	Right	AOWL	14.8871	1823.95	107.653	136.599
583	AV00455	1824	Sight	Finback	AOWL	23.7115	1824.13	88.9177	135.657
584	AV00455	1824	Sight	Finback	AOWL	22.6675	1824.13	88.6064	133.28
585	AV09399	1824	Sight	Finback	AOWL	4.55677	1824.13	97.2595	106.344
586	AV09399	1824	Sight	Finback	AOWL	9.54211	1824.63	66.9732	85.5404
587	AV15152	1824	Sight	Finback	AOWL	16.0632	1824.93	104.873	136.182
588	AV09399	1824	Sight	Humpback	AOWL	9.65519	1824.05	101.889	121.53
589	AV09399	1824	Sight	Humpback	AOWL	9.49036	1824.07	100.678	119.959
590	AV09399	1824	Sight	Humpback	AOWL	13.7543	1824.32	61.7893	88.9363
591	AV13262	1824	Strike	Right	AOWL	14.4704	1824.1	98.3226	126.664
592	AV13262	1824	Strike	Right	AOWL	14.2841	1824.12	95.167	123.19
593	AV13262	1824	Strike	Right	AOWL	14.8394	1824.03	106.635	135.551
594	AV13262	1824	Strike	Right	AOWL	14.8092	1824.03	106.467	135.327
595	AV13262	1824	Strike	Right	AOWL	14.7432	1824.04	106.375	135.106
596	AV13262	1824	Strike	Right	AOWL	14.9004	1824.05	104.398	133.483
597	AV13262	1824	Strike	Right	AOWL	16.4761	1824.06	101.957	134.208
598	AV13262	1824	Strike	Right	AOWL	15.826	1824.07	101.184	132.162
599	AV13262	1824	Strike	Right	AOWL	15.6136	1824.08	100.535	131.1
600	AV13262	1824	Strike	Right	AOWL	14.1793	1824.1	97.4668	125.25
601	AV09399	1824	Sight	Right	AOWL	16.6791	1824.5	44.4934	77.1369
602	AV13262	1824	Sight	Right	AOWL	14.2893	1824.12	95.6319	123.659
603	AV15152	1824	Sight	Right	AOWL	17.2008	1824.98	105.635	139.224
604	AV05600	1824	Strike	Right	AOWL	12.948	1824.96	110.777	135.829
605	AV05600	1824	Strike	Right	AOWL	16.4671	1824.76	80.2576	112.561
606	AV05600	1824	Strike	Right	AOWL	16.6298	1824.78	83.0215	115.632
607	AV05600	1824	Strike	Right	AOWL	16.6235	1824.79	84.4931	117.082
608	AV05600	1824	Strike	Right	AOWL	16.9047	1824.82	89.255	122.377
609	AV05600	1824	Strike	Right	AOWL	16.8406	1824.83	90.611	123.597
610	AV05600	1824	Strike	Right	AOWL	16.5311	1824.84	92.906	125.262
611	AV05600	1824	Strike	Right	AOWL	16.2084	1824.86	96.7158	128.4
612	AV05600	1824	Strike	Right	AOWL	16.7854	1824.88	98.4809	131.286
613	AV05600	1824	Strike	Right	AOWL	16.9979	1824.88	98.8153	132.043
614	AV05600	1824	Strike	Right	AOWL	13.5532	1824.95	109.617	135.879
615	AV05600	1824	Strike	Right	AOWL	12.9255	1824.96	110.814	135.818
616	AV05600	1824	Strike	Right	AOWL	13.0636	1824.98	110.421	135.725
617	AV05600	1824	Strike	Right	AOWL	13.3166	1825	110.195	136.012
618	AV05600	1824	Strike	Right	AOWL	16.5995	1824.77	81.1277	113.688
619	AV05600	1824	Strike	Right	AOWL	13.3782	1824.95	109.555	135.47
620	AV00456	1824	Sight	Right	AOWL	14.5957	1824.78	84.5863	113.158
621	AV00456	1824	Sight	Right	AOWL	15.721	1824.78	84.8351	115.625
622	AV00456	1824	Sight	Right	AOWL	19.6525	1824.88	99.8703	137.589
623	AV05600	1824	Sight	Right	AOWL	14.0246	1824.74	78.7308	106.191
624	AV05600	1824	Sight	Right	AOWL	14.5668	1824.74	78.6684	107.207
625	AV05600	1824	Sight	Right	AOWL	15.5339	1824.76	80.058	110.516
626	AV05600	1824	Sight	Right	AOWL	16.3065	1824.86	95.9346	127.818
627	AV05600	1824	Sight	Right	AOWL	16.1917	1824.86	96.3502	128.004
628	AV05600	1824	Sight	Right	AOWL	16.6816	1824.87	97.7968	130.403
629	AV05600	1824	Sight	Right	AOWL	12.6784	1825	110.815	135.356
630	AV04804	1824	Strike	Right	AOWL	16.751	1824.87	97.8825	130.63
631	AV01968	1824	Strike	Right	AOWL	16.4122	1824.07	100.851	132.998
632	AV01968	1824	Strike	Right	AOWL	20.1581	1824.13	87.3066	127.079
633	AV01968	1824	Strike	Right	AOWL	20.806	1824.17	79.7517	120.877
634	AV01968	1824	Strike	Right	AOWL	20.256	1824.2	74.2879	114.363
635	AV01968	1824	Strike	Right	AOWL	20.2563	1824.22	71.6501	111.736
636	AV01968	1824	Strike	Right	AOWL	20.396	1824.22	69.9403	110.307
637	AV01968	1824	Strike	Right	AOWL	20.2128	1824.26	63.3737	103.378
638	AV01968	1824	Strike	Right	AOWL	20.0452	1824.32	52.9387	92.5562
639	AV04804	1824	Strike	Right	AOWL	16.1658	1824.82	90.1993	121.849
640	AV04804	1824	Strike	Right	AOWL	16.6301	1824.83	91.2468	123.809
641	AV04804	1824	Strike	Right	AOWL	16.6828	1824.84	93.7995	126.445
642	AV04804	1824	Strike	Right	AOWL	16.8813	1824.85	94.1188	127.154
643	AV04804	1824	Strike	Right	AOWL	16.7012	1824.85	94.6031	127.278
644	AV04804	1824	Strike	Right	AOWL	15.9184	1824.91	102.833	133.881
645	AV04804	1824	Strike	Right	AOWL	15.5094	1824.92	104.132	134.364
646	AV04804	1824	Strike	Right	AOWL	14.8573	1824.96	108.535	137.407
647	AV04804	1824	Strike	Right	AOWL	15.2353	1824.98	108.61	138.242
648	AV04804	1824	Strike	Right	AOWL	12.8103	1824.99	110.941	135.737
649	AV01390	1825	Sight	Finback	AOWL	4.1158	1825.75	90.0377	97.8855
650	AV01390	1825	Sight	Finback	AOWL	17.9899	1825.99	106.792	141.916
651	AV09574	1825	Sight	Finback	AOWL	-31.7248	1825.43	90.696	27.9635
652	AV09574	1825	Sight	Finback	AOWL	-10.5821	1825.55	79.8839	58.6921
653	AV09574	1825	Sight	Finback	AOWL	5.48238	1825.57	65.335	75.85
654	AV09574	1825	Sight	Finback	AOWL	6.60718	1825.57	64.2454	76.979
655	AV09574	1825	Sight	Finback	AOWL	7.82244	1825.58	63.0389	78.173
656	AV09574	1825	Sight	Finback	AOWL	28.2995	1825.7	55.2868	111.139
657	AV09574	1825	Sight	Finback	AOWL	10.7121	1825.83	95.4264	116.23
658	AV09574	1825	Sight	Finback	AOWL	3.5469	1825.84	102.564	109.198
659	AV09574	1825	Sight	Finback	AOWL	2.92664	1825.84	103.226	108.653
660	AV09574	1825	Sight	Finback	AOWL	2.89295	1825.86	104.547	110.053
661	AV09574	1825	Sight	Finback	AOWL	4.45193	1825.91	106.707	115.433
662	AV09574	1825	Sight	Humpback	AOWL	9.68736	1825.83	96.4922	115.264
663	AV01390	1825	Sight	Right	AOWL	14.4303	1825.8	87.5781	115.815
664	AV01390	1825	Sight	Right	AOWL	14.7645	1825.8	87.7433	116.643
665	AV09574	1825	Sight	Right	AOWL	13.4704	1825.6	58.1681	84.4947
666	AV09574	1825	Sight	Right	AOWL	13.6857	1825.6	58.551	85.3062
667	AV09574	1825	Sight	Right	AOWL	14.356	1825.6	57.9521	86.0335
668	AV05600	1825	Strike	Right	AOWL	13.3245	1825	109.868	135.71
669	AV05600	1825	Strike	Right	AOWL	12.9798	1825.01	109.857	135.02
670	AV05600	1825	Strike	Right	AOWL	14.1923	1825.02	108.09	135.693
671	AV05600	1825	Strike	Right	AOWL	15.6378	1825.03	106.002	136.509
672	AV05600	1825	Strike	Right	AOWL	13.1802	1825.06	105.553	131.206
673	AV05600	1825	Strike	Right	AOWL	19.9686	1825.1	92.7285	132.053
674	AV05600	1825	Strike	Right	AOWL	20.2793	1825.16	82.1521	122.201
675	AV05600	1825	Strike	Right	AOWL	18.7963	1825.19	77.5217	114.661
676	AV05600	1825	Strike	Right	AOWL	17.8844	1825.2	76.8446	112.167
677	AV05600	1825	Strike	Right	AOWL	17.603	1825.21	75.0504	109.81
678	AV05600	1825	Strike	Right	AOWL	19.94	1825.1	92.2878	131.562
679	AV05600	1825	Strike	Right	AOWL	20.2236	1825.18	78.3856	118.356
680	AV05600	1825	Sight	Right	AOWL	20.103	1825.12	89.4485	129.084
681	AV05600	1825	Sight	Right	AOWL	20.9471	1825.14	85.6208	126.967
682	AV05600	1825	Sight	Right	AOWL	20.2618	1825.15	83.6105	123.617
683	AV01390	1825	Strike	Right	AOWL	16.0192	1825.83	92.7372	124.079
684	AV01390	1825	Strike	Right	AOWL	15.5961	1825.83	92.1224	122.632
685	AV01390	1825	Strike	Right	AOWL	15.6091	1825.85	95.114	125.634
686	AV01390	1825	Strike	Right	AOWL	15.8895	1825.86	97.035	128.088
687	AV01390	1825	Strike	Right	AOWL	17.2959	1825.93	103.78	137.548
688	AV01390	1825	Strike	Right	AOWL	17.4861	1825.93	103.893	138.038
689	AV04804	1825	Strike	Right	AOWL	12.6207	1825.01	110.347	134.789
690	AV04804	1825	Strike	Right	AOWL	14.7016	1825.01	107.821	136.436
691	AV04804	1825	Strike	Right	AOWL	19.9917	1825.11	91.8314	131.214
692	AV04804	1825	Strike	Right	AOWL	19.8553	1825.12	89.5041	128.651
693	AV04804	1825	Strike	Right	AOWL	20.6591	1825.16	81.5797	122.399
694	AV04804	1825	Strike	Right	AOWL	20.476	1825.17	79.5655	120.041
695	AV04804	1825	Strike	Right	AOWL	20.7481	1825.2	72.9632	114.014
696	AV04804	1825	Strike	Right	AOWL	20.8101	1825.21	72.3739	113.549
697	AV04804	1825	Strike	Right	AOWL	20.142	1825.24	66.6607	106.527
698	AV04805	1825	Strike	Right	AOWL	16.4914	1825.87	98.1697	130.396
699	AV04805	1825	Strike	Right	AOWL	16.301	1825.88	99.8893	131.712
700	AV04805	1825	Strike	Right	AOWL	16.1353	1825.89	101.53	133.011
701	AV04805	1825	Strike	Right	AOWL	16.3238	1825.93	105.392	137.208
702	AV04805	1825	Strike	Right	AOWL	16.3844	1825.93	105.465	137.403
703	AV04805	1825	Strike	Right	AOWL	16.3602	1825.96	106.515	138.408
704	AV04805	1825	Strike	Right	AOWL	15.892	1825.97	106.764	137.736
705	AV04805	1825	Strike	Right	AOWL	16.2227	1825.99	106.561	138.206
706	AV01390	1826	Sight	Finback	AOWL	18.9816	1826.13	89.3243	126.73
707	AV02118	1826	Sight	Finback	AOWL	-28.8551	1826.87	139.143	81.8896
708	AV02118	1826	Sight	Finback	AOWL	-18.4907	1826.9	129.512	92.7672
709	AV02118	1826	Sight	Finback	AOWL	-18.8393	1826.96	132.06	94.4452
710	AV02118	1826	Sight	Finback	AOWL	-21.5264	1826.97	134.916	91.9363
711	AV02118	1826	Sight	Finback	AOWL	-22.0777	1826.99	135.246	91.1926
712	AV09574	1826	Sight	Finback	AOWL	4.89702	1826.12	97.353	107.015
713	AV09574	1826	Sight	Finback	AOWL	5.15958	1826.13	96.7513	106.941
714	AV09574	1826	Sight	Finback	AOWL	5.58197	1826.14	94.9763	105.973
715	AV09574	1826	Sight	Finback	AOWL	6.62272	1826.14	92.8695	106.02
716	AV09574	1826	Sight	Finback	AOWL	0.586127	1826.36	68.7627	70.2845
717	AV09574	1826	Sight	Finback	AOWL	0.458489	1826.36	68.4929	69.7689
718	AV09574	1826	Sight	Finback	AOWL	0.0705155	1826.37	67.7943	68.3306
719	AV09574	1826	Sight	Finback	AOWL	0.0846245	1826.37	67.3156	67.8933
720	AV09574	1826	Sight	Finback	AOWL	0.629694	1826.38	65.9838	67.6401
721	AV09574	1826	Sight	Finback	AOWL	0.664629	1826.39	65.3052	67.0479
722	AV09574	1826	Sight	Finback	AOWL	0.73022	1826.39	65.0005	66.8786
723	AV09574	1826	Sight	Finback	AOWL	0.537332	1826.4	64.1502	65.6748
724	AV09574	1826	Sight	Finback	AOWL	0.40617	1826.41	63.7328	65.0049
725	AV09574	1826	Sight	Finback	AOWL	0.249812	1826.41	63.7157	64.6788
726	AV09574	1826	Sight	Finback	AOWL	0.787062	1826.45	61.083	63.1977
727	AV09574	1826	Sight	Finback	AOWL	0.871494	1826.47	60.5075	62.8299
728	AV09574	1826	Sight	Finback	AOWL	0.319105	1826.49	61.2516	62.4947
729	AV09574	1826	Sight	Finback	AOWL	-0.178245	1826.5	61.6387	61.9043
730	AV09574	1826	Sight	Finback	AOWL	0.165906	1826.5	61.6796	62.623
731	AV09574	1826	Sight	Finback	AOWL	0.84207	1826.53	62.8692	65.1798
732	AV09574	1826	Sight	Finback	AOWL	0.98974	1826.54	63.2565	65.858
733	AV09574	1826	Sight	Finback	AOWL	0.841762	1826.54	63.4824	65.7949
734	AV09574	1826	Sight	Finback	AOWL	0.889229	1826.62	72.3126	74.6923
735	AV09574	1826	Sight	Finback	AOWL	0.830727	1826.62	73.0701	75.332
736	AV09574	1826	Sight	Finback	AOWL	0.813272	1826.63	73.3303	75.5632
737	AV09574	1826	Sight	Finback	AOWL	0.965582	1826.63	73.5995	76.1333
738	AV09574	1826	Sight	Finback	AOWL	4.45256	1826.72	84.221	93.6876
739	AV09574	1826	Sight	Finback	AOWL	12.6109	1826.86	96.6262	122.5
740	AV09574	1826	Sight	Finback	AOWL	9.48774	1826.91	103.103	122.575
741	AV09574	1826	Sight	Finback	AOWL	8.65313	1826.94	104.81	122.488
742	AV09574	1826	Sight	Finback	AOWL	6.38838	1826.97	107.074	119.934
743	AV09574	1826	Sight	Humpback	AOWL	3.45841	1826.08	104.137	110.893
744	AV09574	1826	Sight	Humpback	AOWL	1.27948	1826.55	64.0803	67.2525
745	AV09574	1826	Sight	Humpback	AOWL	12.8913	1826.86	96.1317	122.573
746	AV09574	1826	Sight	Humpback	AOWL	12.6109	1826.86	96.6262	122.5
747	AV01390	1826	Sight	Right	AOWL	19.7299	1826.27	62.0224	101.05
748	AV06921	1826	Strike	Right	AOWL	15.1701	1826.73	75.6102	105.351
749	AV06921	1826	Strike	Right	AOWL	17.5808	1826.9	100.593	134.959
750	AV06921	1826	Strike	Right	AOWL	16.9142	1826.67	63.7033	96.8931
751	AV06921	1826	Strike	Right	AOWL	16.9175	1826.67	64.6299	97.8318
752	AV06921	1826	Strike	Right	AOWL	17.8631	1826.89	99.2826	134.218
753	AV06921	1826	Strike	Right	AOWL	17.5459	1826.93	103.352	137.627
754	AV06921	1826	Strike	Right	AOWL	17.4236	1826.93	103.72	137.752
755	AV06921	1826	Strike	Right	AOWL	17.5846	1826.95	104.613	138.963
756	AV06921	1826	Strike	Right	AOWL	17.1671	1826.96	104.856	138.386
757	AV06921	1826	Strike	Right	AOWL	18.1688	1826.99	104.568	140.102
758	AV06921	1826	Strike	Right	AOWL	17.874	1826.81	87.0446	122.103
759	AV06921	1826	Strike	Right	AOWL	18.085	1826.82	88.7659	124.231
760	AV06921	1826	Strike	Right	AOWL	17.0432	1826.84	92.8783	126.247
761	AV06921	1826	Strike	Right	AOWL	16.5537	1826.84	93.8719	126.266
762	AV06921	1826	Strike	Right	AOWL	18.0707	1826.87	97.1298	132.496
763	AV06921	1826	Strike	Right	AOWL	17.5352	1826.93	103.524	137.778
764	AV06921	1826	Sight	Right	AOWL	15.7747	1826.65	62.9394	93.8594
765	AV06921	1826	Sight	Right	AOWL	15.7375	1826.65	63.4409	94.2909
766	AV06921	1826	Sight	Right	AOWL	15.8113	1826.66	63.7796	94.7779
767	AV06921	1826	Sight	Right	AOWL	16.9169	1826.67	64.1667	97.3648
768	AV06921	1826	Sight	Right	AOWL	17.2388	1826.69	67.0043	100.853
769	AV06921	1826	Sight	Right	AOWL	16.9374	1826.69	67.8013	101.051
770	AV06921	1826	Sight	Right	AOWL	14.625	1826.72	75.242	103.893
771	AV06921	1826	Sight	Right	AOWL	15.8685	1826.76	81.4813	112.591
772	AV06921	1826	Sight	Right	AOWL	17.4543	1826.8	86.88	121.106
773	AV06921	1826	Sight	Right	AOWL	18.0829	1826.81	87.4372	122.905
774	AV01390	1826	Strike	Right	AOWL	20.3119	1826.06	99.6362	139.515
775	AV01390	1826	Strike	Right	AOWL	20.4391	1826.07	97.0282	137.208
776	AV01390	1826	Strike	Right	AOWL	20.4399	1826.1	92.7077	132.961
777	AV01390	1826	Strike	Right	AOWL	20.44	1826.11	91.7794	132.047
778	AV04805	1826	Strike	Right	AOWL	16.5016	1826.04	103.921	136.187
779	AV04805	1826	Strike	Right	AOWL	16.4486	1826.05	102.18	134.38
780	AV04805	1826	Strike	Right	AOWL	20.1555	1826.1	92.3511	132.049
781	AV04805	1826	Strike	Right	AOWL	20.4062	1826.13	87.4685	127.727
782	AV04805	1826	Strike	Right	AOWL	20.939	1826.17	78.8806	120.274
783	AV04805	1826	Strike	Right	AOWL	21.1351	1826.18	78.2262	120.011
784	AV04805	1826	Strike	Right	AOWL	20.7454	1826.19	76.8515	117.877
785	AV04805	1826	Strike	Right	AOWL	18.7777	1826.25	66.2407	103.408
786	AV05602	1826	Strike	Right	AOWL	15.4275	1826.8	86.8166	117.03
787	AV05602	1826	Strike	Right	AOWL	15.0142	1826.81	89.4501	118.823
788	AV05602	1826	Strike	Right	AOWL	15.8824	1826.82	90.1011	121.193
789	AV05602	1826	Strike	Right	AOWL	16.2856	1826.83	92.0914	123.965
790	AV05602	1826	Strike	Right	AOWL	17.0981	1826.86	95.6641	129.119
791	AV05602	1826	Strike	Right	AOWL	16.1634	1826.87	98.9104	130.474
792	AV05602	1826	Strike	Right	AOWL	16.1501	1826.88	99.3265	130.859
793	AV05602	1826	Strike	Right	AOWL	16.0342	1826.88	100.105	131.401
794	AV05602	1826	Strike	Right	AOWL	16.2624	1826.88	100.489	132.23
795	AV05602	1826	Strike	Right	AOWL	15.504	1826.91	103.44	133.657
796	AV05602	1826	Strike	Right	AOWL	15.4779	1826.91	103.628	133.793
797	AV05602	1826	Strike	Right	AOWL	15.5178	1826.93	105.563	135.776
798	AV05602	1826	Strike	Right	AOWL	13.6399	1826.98	109.719	136.178
799	AV02118	1827	Sight	Finback	AOWL	-22.918	1827.04	133.551	87.8793
800	AV02118	1827	Sight	Finback	AOWL	-24.0138	1827.11	127.757	79.9253
801	AV02118	1827	Sight	Finback	AOWL	-24.5336	1827.17	120.34	71.4673
802	AV02118	1827	Sight	Finback	AOWL	-24.5648	1827.18	119.641	70.7109
803	AV02118	1827	Sight	Finback	AOWL	-24.7588	1827.18	119.131	69.8031
804	AV02118	1827	Sight	Finback	AOWL	-24.6893	1827.19	118.695	69.5088
805	AV02118	1827	Sight	Finback	AOWL	-24.358	1827.19	117.26	68.7446
806	AV02118	1827	Sight	Finback	AOWL	-24.1984	1827.2	116.737	68.5408
807	AV02118	1827	Sight	Finback	AOWL	-24.0159	1827.2	116.184	68.3568
808	AV02118	1827	Sight	Finback	AOWL	-23.7107	1827.2	115.523	68.3019
809	AV02118	1827	Sight	Finback	AOWL	-23.3466	1827.2	114.799	68.304
810	AV02118	1827	Sight	Finback	AOWL	-14.2323	1827.25	99.6402	71.4696
811	AV02118	1827	Sight	Finback	AOWL	-14.3144	1827.26	98.5637	70.2508
812	AV02118	1827	Sight	Finback	AOWL	-28.7622	1827.32	101.997	45.0661
813	AV02118	1827	Sight	Finback	AOWL	-35.4188	1827.42	95.5294	25.3987
814	AV02763	1827	Sight	Finback	AOWL	10.1713	1827.36	61.0151	82.1265
815	AV02763	1827	Sight	Finback	AOWL	10.2395	1827.4	56.8614	78.1116
816	AV02763	1827	Sight	Finback	AOWL	10.3109	1827.4	56.5447	77.9442
817	AV05358	1827	Sight	Finback	AOWL	-1.78759	1827.44	59.776	56.9285
818	AV05358	1827	Sight	Finback	AOWL	9.80227	1827.68	73.7074	92.7691
819	AV05358	1827	Sight	Finback	AOWL	14.3564	1827.72	75.3964	103.517
820	AV05358	1827	Sight	Finback	AOWL	14.7751	1827.73	75.9023	104.847
821	AV05358	1827	Sight	Finback	AOWL	15.0912	1827.73	76.0612	105.633
822	AV05358	1827	Sight	Finback	AOWL	15.5295	1827.73	76.0962	106.542
823	AV05358	1827	Sight	Finback	AOWL	15.5546	1827.75	78.9731	109.452
824	AV05358	1827	Sight	Finback	AOWL	15.08	1827.78	85.525	115.037
825	AV05358	1827	Sight	Finback	AOWL	15.4217	1827.8	87.1039	117.286
826	AV05358	1827	Sight	Finback	AOWL	15.3644	1827.8	88.0146	118.08
827	AV05358	1827	Sight	Finback	AOWL	14.9167	1827.81	89.1449	118.319
828	AV05358	1827	Sight	Finback	AOWL	15.6758	1827.82	90.3905	121.062
829	AV05358	1827	Sight	Finback	AOWL	15.848	1827.87	99.1899	130.122
830	AV05358	1827	Sight	Finback	AOWL	15.7483	1827.88	100.702	131.423
831	AV05358	1827	Sight	Finback	AOWL	16.2843	1827.9	102.321	134.094
832	AV05358	1827	Sight	Finback	AOWL	16.172	1827.94	105.341	136.866
833	AV05358	1827	Sight	Finback	AOWL	15.4245	1827.94	106.814	136.829
834	AV07073	1827	Sight	Finback	AOWL	11.0222	1827.3	66.7756	89.6594
835	AV07073	1827	Sight	Finback	AOWL	10.7104	1827.31	65.4182	87.653
836	AV09574	1827	Sight	Finback	AOWL	4.0649	1827.12	98.0949	106.346
837	AV09574	1827	Sight	Finback	AOWL	4.28073	1827.13	96.859	105.544
838	AV09574	1827	Sight	Finback	AOWL	3.45126	1827.18	91.3849	98.3961
839	AV09574	1827	Sight	Finback	AOWL	3.55736	1827.19	90.516	97.7549
840	AV09574	1827	Sight	Finback	AOWL	3.16067	1827.28	79.088	85.5071
841	AV09574	1827	Sight	Finback	AOWL	3.70886	1827.3	75.7991	83.3068
842	AV09574	1827	Sight	Finback	AOWL	5.07368	1827.37	66.8216	77.0763
843	AV09574	1827	Sight	Finback	AOWL	4.8318	1827.39	64.9554	74.6974
844	AV09574	1827	Sight	Finback	AOWL	4.77177	1827.4	64.6068	74.2215
845	AV09574	1827	Sight	Finback	AOWL	3.69209	1827.52	64.3807	71.6304
846	AV09574	1827	Sight	Finback	AOWL	3.59886	1827.57	68.151	75.1718
847	AV09574	1827	Sight	Finback	AOWL	3.21762	1827.59	70.1354	76.3596
848	AV09574	1827	Sight	Finback	AOWL	13.44	1827.84	96.8784	123.046
849	AV02118	1827	Strike	Humpback	AOWL	-15.5713	1827.28	96.1313	65.3927
850	AV02118	1827	Sight	Humpback	AOWL	-15.3463	1827.28	96.2964	66.0034
851	AV05358	1827	Sight	Humpback	AOWL	9.80227	1827.68	73.7074	92.7691
852	AV05358	1827	Sight	Humpback	AOWL	11.6638	1827.68	72.49	95.2445
853	AV09574	1827	Sight	Humpback	AOWL	3.63219	1827.27	79.965	87.3643
854	AV09574	1827	Sight	Humpback	AOWL	3.66935	1827.53	64.7165	71.9096
855	AV09574	1827	Sight	Humpback	AOWL	4.22078	1827.53	64.506	72.79
856	AV09574	1827	Sight	Humpback	AOWL	3.6275	1827.54	65.2774	72.3685
857	AV09574	1827	Sight	Humpback	AOWL	3.68855	1827.55	66.2003	73.4125
858	AV09574	1827	Sight	Humpback	AOWL	3.59886	1827.57	68.151	75.1718
859	AV09574	1827	Sight	Humpback	AOWL	3.33399	1827.59	70.3	76.7518
860	AV09574	1827	Sight	Humpback	AOWL	3.46198	1827.61	71.621	78.3316
861	AV02118	1827	Strike	Humpback	AOWL	-16.3504	1827.28	96.9303	64.6308
862	AV05358	1827	Strike	Right	AOWL	15.913	1827.89	100.967	132.011
863	AV05358	1827	Strike	Right	AOWL	14.6307	1827.71	73.3131	101.974
864	AV05358	1827	Sight	Right	AOWL	14.3564	1827.72	75.3964	103.517
865	AV05358	1827	Sight	Right	AOWL	14.7751	1827.73	75.9023	104.847
866	AV05358	1827	Sight	Right	AOWL	15.0912	1827.73	76.0612	105.633
867	AV05358	1827	Sight	Right	AOWL	14.9167	1827.81	89.1449	118.319
868	AV05358	1827	Sight	Right	AOWL	15.7817	1827.94	106.645	137.375
869	AV06921	1827	Strike	Right	AOWL	19.9261	1827.04	101.215	140.299
870	AV06921	1827	Strike	Right	AOWL	19.9146	1827.06	99.9758	139.063
871	AV06921	1827	Strike	Right	AOWL	19.9968	1827.08	96.2788	135.596
872	AV06921	1827	Strike	Right	AOWL	20.1686	1827.09	95.7575	135.424
873	AV06921	1827	Strike	Right	AOWL	14.3386	1827.16	88.7211	116.909
874	AV06921	1827	Strike	Right	AOWL	18.311	1827	104.385	140.206
875	AV06921	1827	Strike	Right	AOWL	19.7157	1827.07	98.4989	137.224
876	AV06921	1827	Sight	Right	AOWL	18.0323	1827	104.267	139.543
877	AV06921	1827	Sight	Right	AOWL	19.2088	1827.04	101.405	139.072
878	AV11123	1827	Sight	Right	AOWL	22.0347	1827.1	93.0098	136.405
879	AV11123	1827	Sight	Right	AOWL	26.0328	1827.11	92.2113	143.521
880	AV01391	1827	Strike	Right	AOWL	15.9301	1827.88	99.6439	130.739
881	AV05603	1827	Strike	Right	AOWL	18.2967	1827.91	101.737	137.507
882	AV05704	1827	Strike	Right	AOWL	15.9916	1827.84	93.9612	125.234
883	AV01391	1827	Strike	Right	AOWL	16.1051	1827.74	77.8644	109.457
884	AV01391	1827	Strike	Right	AOWL	16.1053	1827.75	78.7999	110.391
885	AV01391	1827	Strike	Right	AOWL	16.1546	1827.81	89.2019	120.846
886	AV01391	1827	Strike	Right	AOWL	16.1446	1827.82	89.6433	121.264
887	AV01391	1827	Strike	Right	AOWL	16.1883	1827.83	91.8518	123.54
888	AV01391	1827	Strike	Right	AOWL	15.742	1827.86	96.2008	126.959
889	AV01391	1827	Strike	Right	AOWL	15.3481	1827.86	97.4796	127.449
890	AV01391	1827	Strike	Right	AOWL	15.9961	1827.89	101.013	132.225
891	AV01391	1827	Strike	Right	AOWL	15.8403	1827.91	102.672	133.567
892	AV05602	1827	Strike	Right	AOWL	15.902	1827.01	106.521	137.538
893	AV05602	1827	Strike	Right	AOWL	15.8789	1827.01	106.234	137.215
894	AV05602	1827	Strike	Right	AOWL	15.8401	1827.02	105.609	136.53
895	AV05602	1827	Strike	Right	AOWL	15.3219	1827.05	103.576	133.519
896	AV05602	1827	Strike	Right	AOWL	14.74	1827.05	103.865	132.65
897	AV05602	1827	Strike	Right	AOWL	20.4259	1827.11	91.4024	131.649
898	AV05602	1827	Strike	Right	AOWL	22.4015	1827.13	87.086	131.282
899	AV05602	1827	Strike	Right	AOWL	22.1958	1827.14	86.0288	129.832
900	AV05602	1827	Strike	Right	AOWL	22.2776	1827.14	85.4724	129.443
901	AV05602	1827	Strike	Right	AOWL	22.2108	1827.16	81.0704	124.954
902	AV05602	1827	Strike	Right	AOWL	22.1627	1827.17	78.8507	122.659
903	AV05602	1827	Strike	Right	AOWL	22.5158	1827.19	74.6786	119.21
904	AV05602	1827	Strike	Right	AOWL	22.1825	1827.2	72.6269	116.512
905	AV05602	1827	Strike	Right	AOWL	22.4215	1827.22	69.5932	113.961
906	AV05602	1827	Strike	Right	AOWL	22.6239	1827.23	67.1214	111.894
907	AV05603	1827	Strike	Right	AOWL	16.8711	1827.76	79.5812	112.688
908	AV05603	1827	Strike	Right	AOWL	17.2308	1827.78	82.6699	116.476
909	AV05603	1827	Strike	Right	AOWL	17.3765	1827.78	83.5084	117.6
910	AV05603	1827	Strike	Right	AOWL	16.8688	1827.8	86.2845	119.352
911	AV05603	1827	Strike	Right	AOWL	16.778	1827.8	87.3248	120.204
912	AV05603	1827	Strike	Right	AOWL	17.2412	1827.81	88.8548	122.642
913	AV05603	1827	Strike	Right	AOWL	17.2146	1827.82	89.7778	123.506
914	AV05603	1827	Strike	Right	AOWL	17.2472	1827.83	91.5549	125.334
915	AV05603	1827	Strike	Right	AOWL	17.358	1827.84	92.4064	126.397
916	AV05603	1827	Strike	Right	AOWL	17.1526	1827.84	93.4841	127.057
917	AV05603	1827	Strike	Right	AOWL	18.1713	1827.9	100.944	136.473
918	AV05603	1827	Strike	Right	AOWL	18.1099	1827.94	103.686	139.073
919	AV05603	1827	Strike	Right	AOWL	20.4677	1827.96	104.921	144.963
920	AV05603	1827	Strike	Right	AOWL	20.2885	1827.98	104.946	144.645
921	AV05603	1827	Strike	Right	AOWL	20.1398	1827.99	104.83	144.24
922	AV05704	1827	Strike	Right	AOWL	15.3324	1827.73	75.3518	105.409
923	AV05704	1827	Strike	Right	AOWL	16.8945	1827.79	85.5819	118.694
924	AV05704	1827	Strike	Right	AOWL	16.8945	1827.8	86.0615	119.171
925	AV05704	1827	Strike	Right	AOWL	16.8945	1827.81	88.4349	121.529
926	AV05704	1827	Strike	Right	AOWL	15.9915	1827.84	94.3761	125.645
927	AV05704	1827	Strike	Right	AOWL	16.8612	1827.92	104.193	137.083
928	AV05358	1828	Sight	Finback	AOWL	19.6295	1828.01	104.21	142.638
929	AV05358	1828	Sight	Finback	AOWL	20.2983	1828.27	60.68	100.843
930	AV07074	1828	Sight	Finback	AOWL	11.0755	1828.34	61.4256	84.4585
931	AV07074	1828	Sight	Finback	AOWL	11.2929	1828.35	59.6955	83.2032
932	AV13417	1828	Sight	Finback	AOWL	24.4346	1828.32	44.2643	93.1134
933	AV13417	1828	Sight	Finback	AOWL	15.3885	1828.35	54.6697	85.3802
934	AV13417	1828	Sight	Finback	AOWL	5.75499	1828.4	61.9376	73.1289
935	AV13417	1828	Sight	Finback	AOWL	5.882	1828.41	61.3968	72.8305
936	AV13417	1828	Sight	Finback	AOWL	5.44621	1828.41	61.7722	72.3432
937	AV13417	1828	Sight	Finback	AOWL	3.73604	1828.42	63.4877	70.6902
938	AV13417	1828	Sight	Finback	AOWL	2.87916	1828.42	64.461	69.9895
939	AV13417	1828	Sight	Finback	AOWL	2.72253	1828.42	64.5527	69.7784
940	AV13417	1828	Sight	Finback	AOWL	2.68555	1828.43	64.501	69.6578
941	AV13417	1828	Sight	Finback	AOWL	2.93007	1828.45	63.8667	69.649
942	AV13417	1828	Sight	Finback	AOWL	4.19537	1828.46	62.4727	70.8188
943	AV13417	1828	Sight	Finback	AOWL	3.64737	1828.51	63.6157	70.8284
944	AV13417	1828	Sight	Finback	AOWL	3.43069	1828.51	63.9452	70.7143
945	AV13417	1828	Sight	Finback	AOWL	4.02934	1828.52	63.7226	71.6656
946	AV13417	1828	Sight	Finback	AOWL	3.57159	1828.52	64.319	71.338
947	AV13417	1828	Sight	Finback	AOWL	3.09707	1828.57	68.0805	74.0278
948	AV13417	1828	Sight	Finback	AOWL	3.08831	1828.57	68.3475	74.2895
949	AV13417	1828	Sight	Finback	AOWL	3.07664	1828.59	70.4871	76.4045
950	AV13417	1828	Sight	Finback	AOWL	3.06337	1828.6	70.781	76.6639
951	AV13417	1828	Sight	Finback	AOWL	3.08187	1828.6	71.0522	76.9797
952	AV13417	1828	Sight	Finback	AOWL	3.08035	1828.65	76.7025	82.612
953	AV13417	1828	Sight	Finback	AOWL	3.09509	1828.65	77.3566	83.2997
954	AV13417	1828	Sight	Finback	AOWL	3.09044	1828.66	78.0397	83.9711
955	AV13417	1828	Sight	Finback	AOWL	3.06352	1828.67	79.4472	85.3124
956	AV13417	1828	Sight	Finback	AOWL	3.07203	1828.68	80.4789	86.3644
957	AV13417	1828	Sight	Finback	AOWL	3.06619	1828.68	81.1885	87.0589
958	AV13417	1828	Sight	Finback	AOWL	3.06743	1828.7	83.3113	89.1832
959	AV13417	1828	Sight	Finback	AOWL	3.07473	1828.7	83.6558	89.5454
960	AV13417	1828	Sight	Finback	AOWL	3.0756	1828.7	84.0116	89.903
961	AV13417	1828	Sight	Finback	AOWL	3.08329	1828.71	85.0736	90.9824
962	AV13417	1828	Sight	Finback	AOWL	3.07742	1828.72	86.5223	92.4161
963	AV13417	1828	Sight	Finback	AOWL	3.09583	1828.73	87.2121	93.1483
964	AV13417	1828	Sight	Finback	AOWL	3.10074	1828.74	88.2864	94.233
965	AV13417	1828	Sight	Finback	AOWL	3.13045	1828.75	90.4028	96.4145
966	AV13417	1828	Sight	Finback	AOWL	3.11368	1828.8	96.1388	102.109
967	AV13417	1828	Sight	Finback	AOWL	4.16325	1828.84	100.786	108.864
968	AV13417	1828	Sight	Finback	AOWL	5.39538	1828.88	103.704	114.323
969	AV13417	1828	Sight	Finback	AOWL	4.37605	1828.91	106.585	115.367
970	AV13417	1828	Sight	Finback	AOWL	3.08223	1828.98	110.53	116.587
971	AV07074	1828	Strike	Humpback	AOWL	0.2333	1828.1	104.694	105.581
972	AV07074	1828	Strike	Humpback	AOWL	0.128119	1828.11	103.777	104.441
973	AV07074	1828	Sight	Humpback	AOWL	0.327641	1828.08	107.161	108.256
974	AV07074	1828	Sight	Humpback	AOWL	0.175052	1828.11	103.412	104.176
975	AV13417	1828	Sight	Humpback	AOWL	13.5736	1828.37	54.8194	81.5254
976	AV13417	1828	Sight	Humpback	AOWL	13.2765	1828.37	54.9163	81.0291
977	AV13417	1828	Sight	Humpback	AOWL	2.87916	1828.42	64.461	69.9895
978	AV13417	1828	Sight	Humpback	AOWL	4.02934	1828.52	63.7226	71.6656
979	AV13417	1828	Sight	Humpback	AOWL	3.31317	1828.54	65.9195	72.3588
980	AV13417	1828	Sight	Humpback	AOWL	3.43285	1828.83	99.2673	105.872
981	AV13417	1828	Sight	Humpback	AOWL	4.26852	1828.85	100.98	109.274
982	AV13417	1828	Sight	Humpback	AOWL	4.35237	1828.85	101.209	109.671
983	AV13417	1828	Sight	Humpback	AOWL	4.4019	1828.85	101.498	110.051
984	AV14071	1828	Sight	Humpback	AOWL	-12.9321	1828.72	102.045	76.1131
985	AV14071	1828	Sight	Humpback	AOWL	7.29822	1828.78	90.8009	104.926
986	AV14071	1828	Sight	Humpback	AOWL	6.00798	1828.78	92.5398	104.074
987	AV14071	1828	Sight	Humpback	AOWL	2.63892	1829	111.551	116.577
988	AV05358	1828	Sight	Right	AOWL	19.6347	1828	104.793	143.214
989	AV05358	1828	Sight	Right	AOWL	19.8191	1828	104.753	143.541
990	AV05358	1828	Sight	Right	AOWL	20.3605	1828.02	104.017	143.896
991	AV05358	1828	Sight	Right	AOWL	19.6243	1828.05	101.051	139.544
992	AV14071	1828	Sight	Right	AOWL	16.4074	1828.83	91.1395	123.255
993	AV00457	1828	Sight	Right	AOWL	7.60479	1828.42	54.1651	69.9246
994	AV12449	1828	Sight	Right	AOWL	18.0961	1828.03	103.198	138.629
995	AV12449	1828	Sight	Right	AOWL	19.2153	1828.03	102.807	140.453
996	AV12449	1828	Sight	Right	AOWL	21.0105	1828.1	95.9047	136.457
997	AV15154	1828	Sight	Right	AOWL	5.29551	1828.24	81.2889	92.1297
998	AV05603	1828	Strike	Right	AOWL	20.4157	1828.03	102.161	142.191
999	AV05603	1828	Strike	Right	AOWL	20.2889	1828	104.435	144.156
1000	AV05603	1828	Strike	Right	AOWL	20.5611	1828.01	103.754	144.033
1001	AV05603	1828	Strike	Right	AOWL	20.6161	1828.06	99.0667	139.557
1002	AV05603	1828	Strike	Right	AOWL	22.9533	1828.13	87.1988	132.481
1003	AV05603	1828	Strike	Right	AOWL	23.0301	1828.14	84.3868	129.852
1004	AV05603	1828	Strike	Right	AOWL	23.0749	1828.15	83.2379	128.804
1005	AV05603	1828	Strike	Right	AOWL	22.9084	1828.17	78.0755	123.359
1006	AV05603	1828	Strike	Right	AOWL	22.9402	1828.18	77.4793	122.83
1007	AV05603	1828	Strike	Right	AOWL	22.9176	1828.19	75.155	120.476
1008	AV05603	1828	Strike	Right	AOWL	22.7262	1828.19	74.1052	119.055
1009	AV05603	1828	Strike	Right	AOWL	22.9855	1828.21	69.8371	115.317
1010	AV05704	1828	Strike	Right	AOWL	20.5269	1828.03	103.471	142.976
1011	AV05704	1828	Strike	Right	AOWL	20.5271	1828.03	102.955	142.472
1012	AV05704	1828	Strike	Right	AOWL	20.5282	1828.06	100.468	140.04
1013	AV05704	1828	Strike	Right	AOWL	20.5293	1828.08	96.5559	136.204
1014	AV05704	1828	Strike	Right	AOWL	20.5302	1828.1	94.3368	134.025
1015	AV05704	1828	Strike	Right	AOWL	20.5309	1828.11	91.498	131.232
1016	AV05704	1828	Strike	Right	AOWL	20.5312	1828.12	90.02	129.777
1017	AV05704	1828	Strike	Right	AOWL	20.5324	1828.15	84.888	125.418
1018	AV05704	1828	Strike	Right	AOWL	20.534	1828.18	79.0162	119.604
1019	AV05704	1828	Strike	Right	AOWL	20.535	1828.2	74.1408	114.761
1020	AV05704	1828	Strike	Right	AOWL	20.5353	1828.21	73.056	113.681
1021	AV05704	1828	Strike	Right	AOWL	19.2493	1828.29	58.7017	96.7811
1022	AV05704	1828	Strike	Right	AOWL	19.2495	1828.3	58.2341	96.311
1023	AV05893	1828	Strike	Right	AOWL	14.9337	1828.88	100.954	130.046
1024	AV05893	1828	Strike	Right	AOWL	14.9335	1828.89	102.318	131.398
1025	AV05893	1828	Strike	Right	AOWL	15.097	1828.9	103.549	132.934
1026	AV05893	1828	Strike	Right	AOWL	14.9545	1828.9	103.887	132.994
1027	AV05893	1828	Strike	Right	AOWL	14.9238	1828.91	104.652	133.693
1028	AV05893	1828	Strike	Right	AOWL	14.9364	1828.91	104.928	133.991
1029	AV05893	1828	Strike	Right	AOWL	14.8773	1828.95	107.063	136.002
1030	AV05893	1828	Strike	Right	AOWL	16.3669	1828.97	107.525	139.416
1031	AV07075	1829	Sight	Finback	AOWL	4.3702	1829.1	100.153	109.362
1032	AV13417	1829	Sight	Finback	AOWL	2.77364	1829.07	105.019	110.429
1033	AV13417	1829	Sight	Finback	AOWL	2.31162	1829.08	104.64	109.105
1034	AV13417	1829	Sight	Finback	AOWL	1.29938	1829.12	101.662	104.021
1035	AV13417	1829	Sight	Finback	AOWL	4.53811	1829.16	92.7571	101.667
1036	AV13417	1829	Sight	Finback	AOWL	6.16474	1829.18	88.951	101.15
1037	AV13417	1829	Sight	Finback	AOWL	8.80998	1829.37	58.7056	76.7373
1038	AV13417	1829	Sight	Finback	AOWL	8.73196	1829.37	58.1333	76.02
1039	AV13417	1829	Sight	Finback	AOWL	7.67445	1829.49	53.9706	69.9237
1040	AV13417	1829	Sight	Finback	AOWL	7.55062	1829.5	54.3144	70.0301
1041	AV14071	1829	Sight	Finback	AOWL	2.74735	1829.01	110.97	116.244
1042	AV14071	1829	Sight	Finback	AOWL	3.15582	1829.04	107.886	114.18
1043	AV14071	1829	Sight	Finback	AOWL	3.1796	1829.09	102.56	108.963
1044	AV14071	1829	Sight	Finback	AOWL	3.22134	1829.1	101.939	108.417
1045	AV14071	1829	Sight	Finback	AOWL	3.29706	1829.1	101.494	108.14
1046	AV14071	1829	Sight	Finback	AOWL	4.16038	1829.16	93.3515	101.782
1047	AV14071	1829	Sight	Finback	AOWL	4.55543	1829.19	89.3092	98.5518
1048	AV14071	1829	Sight	Finback	AOWL	1.91809	1829.29	78.2776	81.9458
1049	AV14071	1829	Sight	Finback	AOWL	4.47834	1829.45	57.6787	67.1584
1050	AV14071	1829	Sight	Finback	AOWL	4.65561	1829.47	56.9383	66.8214
1051	AV14071	1829	Sight	Finback	AOWL	2.68225	1829.5	59.0521	65.0328
1052	AV14071	1829	Sight	Finback	AOWL	9.66274	1829.95	104.775	124.549
1053	AV14071	1829	Sight	Finback	AOWL	9.05832	1829.95	105.202	123.718
1054	AV14071	1829	Sight	Finback	AOWL	7.44129	1829.98	106.265	121.353
1055	AV14071	1829	Sight	Finback	AOWL	7.21022	1829.99	106.294	120.864
1056	AV07075	1829	Sight	Humpback	AOWL	0.292428	1829.04	110.83	111.832
1057	AV07075	1829	Sight	Humpback	AOWL	0.219816	1829.04	110.41	111.257
1058	AV07075	1829	Sight	Humpback	AOWL	0.341942	1829.07	108.084	109.207
1059	AV14071	1829	Sight	Humpback	AOWL	2.79976	1829.01	110.428	115.837
1060	AV14071	1829	Sight	Humpback	AOWL	2.88401	1829.02	110.027	115.617
1061	AV14071	1829	Sight	Humpback	AOWL	2.84828	1829.03	109.508	115.079
1062	AV14071	1829	Sight	Humpback	AOWL	2.87278	1829.03	109.198	114.846
1063	AV14071	1829	Sight	Humpback	AOWL	3.29706	1829.1	101.494	108.14
1064	AV07426	1829	Strike	Right	AOWL	-28.9344	1829.93	148.096	89.4942
1065	AV07426	1829	Strike	Right	AOWL	-28.7652	1829.99	149.349	91.1122
1066	AV13237	1829	Strike	Right	AOWL	-36.5858	1829.94	156.055	82.1675
1067	AV13237	1829	Strike	Right	AOWL	-36.4195	1830	156.751	83.2202
1068	AV07426	1829	Strike	Right	AOWL	-23.2803	1829.76	120.638	73.4468
1069	AV07426	1829	Strike	Right	AOWL	-27.2502	1829.81	131.148	76.0001
1070	AV07426	1829	Strike	Right	AOWL	-27.5632	1829.81	132.786	77.0027
1071	AV07426	1829	Strike	Right	AOWL	-26.8318	1829.85	137.509	83.1499
1072	AV09262	1829	Strike	Right	AOWL	13.3387	1829.79	88.3548	114.381
1073	AV09262	1829	Strike	Right	AOWL	13.4378	1829.83	94.1332	120.318
1074	AV09262	1829	Strike	Right	AOWL	14.2415	1829.89	102.962	130.657
1075	AV09262	1829	Strike	Right	AOWL	14.2584	1829.92	106.028	133.733
1076	AV09262	1829	Strike	Right	AOWL	13.5023	1829.92	106.9	133.1
1077	AV13237	1829	Strike	Right	AOWL	-35.3792	1829.84	144.139	72.7091
1078	AV13237	1829	Strike	Right	AOWL	-35.3876	1829.85	145.223	73.7737
1079	AV13237	1829	Strike	Right	AOWL	-35.3624	1829.85	145.971	74.5674
1080	AV13237	1829	Strike	Right	AOWL	-35.8097	1829.88	150.522	78.1997
1081	AV13237	1829	Strike	Right	AOWL	-36.0193	1829.9	151.976	79.236
1082	AV13237	1829	Strike	Right	AOWL	-36.1553	1829.9	152.344	79.3318
1083	AV13237	1829	Strike	Right	AOWL	-36.3545	1829.93	154.911	81.4971
1084	AV13237	1829	Strike	Right	AOWL	-36.6632	1829.96	156.24	82.2323
1085	AV13237	1829	Strike	Right	AOWL	-36.4193	1829.99	156.854	83.3184
1086	AV13237	1829	Strike	Right	AOWL	-36.4196	1829.99	156.85	83.3149
1087	AV15378	1829	Strike	Right	AOWL	2.56204	1829.52	61.0726	66.7893
1088	AV07426	1829	Strike	Right	AOWL	-20.6771	1829.71	109.738	67.7761
1089	AV07426	1829	Strike	Right	AOWL	-27.7812	1829.72	118.189	62.0217
1090	AV09262	1829	Strike	Right	AOWL	15.3377	1829.86	98.1053	128.03
1091	AV13237	1829	Strike	Right	AOWL	-20.8104	1829.75	115.249	73.0254
1092	AV13237	1829	Strike	Right	AOWL	-22.016	1829.77	120.487	75.8401
1093	AV13237	1829	Strike	Right	AOWL	-31.5649	1829.82	137.033	73.2523
1094	AV13237	1829	Strike	Right	AOWL	-35.4025	1829.85	145.632	74.1504
1095	AV07426	1829	Sight	Right	AOWL	-16.2932	1829.7	103.137	69.952
1096	AV07426	1829	Sight	Right	AOWL	-15.8026	1829.7	103.082	70.8763
1097	AV07426	1829	Sight	Right	AOWL	-27.5197	1829.72	117.476	61.8334
1098	AV07426	1829	Sight	Right	AOWL	-28.4245	1829.73	119.282	61.8282
1099	AV07426	1829	Sight	Right	AOWL	-25.19	1829.75	119.745	68.7461
1100	AV07426	1829	Sight	Right	AOWL	-23.3689	1829.77	122.034	74.6662
1101	AV07426	1829	Sight	Right	AOWL	-23.1406	1829.78	122.746	75.8295
1102	AV07426	1829	Sight	Right	AOWL	-22.9496	1829.78	123.006	76.4702
1103	AV07426	1829	Sight	Right	AOWL	-22.5567	1829.78	123.08	77.3266
1104	AV07426	1829	Sight	Right	AOWL	-22.9901	1829.79	123.911	77.2921
1105	AV07426	1829	Sight	Right	AOWL	-25.848	1829.8	128.007	75.6719
1106	AV07426	1829	Sight	Right	AOWL	-28.1479	1829.97	149.101	92.0756
1107	AV09262	1829	Sight	Right	AOWL	12.4951	1829.76	84.6152	108.969
1108	AV09262	1829	Sight	Right	AOWL	12.8888	1829.76	84.723	109.86
1109	AV09262	1829	Sight	Right	AOWL	13.0928	1829.77	84.909	110.459
1110	AV09262	1829	Sight	Right	AOWL	13.0937	1829.77	85.7953	111.346
1111	AV09262	1829	Sight	Right	AOWL	13.0235	1829.81	92.6252	117.986
1112	AV09262	1829	Sight	Right	AOWL	14.1435	1829.83	94.3488	121.937
1113	AV09262	1829	Sight	Right	AOWL	14.3346	1829.83	94.5709	122.538
1114	AV09262	1829	Sight	Right	AOWL	14.4674	1829.88	101.348	129.515
1115	AV09262	1829	Sight	Right	AOWL	14.5164	1829.88	102.333	130.581
1116	AV09262	1829	Sight	Right	AOWL	14.6503	1829.89	102.575	131.101
1117	AV09262	1829	Sight	Right	AOWL	13.7406	1829.9	104.986	131.673
1118	AV09262	1829	Sight	Right	AOWL	13.9909	1829.91	104.9	132.088
1119	AV09262	1829	Sight	Right	AOWL	13.8471	1829.91	106.117	133.004
1120	AV09262	1829	Sight	Right	AOWL	13.7032	1829.92	106.599	133.198
1121	AV09262	1829	Sight	Right	AOWL	12.2574	1829.95	109.822	133.526
1122	AV09262	1829	Sight	Right	AOWL	12.55	1829.96	110.43	134.705
1123	AV09262	1829	Sight	Right	AOWL	11.8317	1829.96	110.937	133.785
1124	AV13237	1829	Sight	Right	AOWL	-16.81	1829.71	105.41	71.1738
1125	AV13237	1829	Sight	Right	AOWL	-20.1715	1829.74	113.725	72.7795
1126	AV13237	1829	Sight	Right	AOWL	-21.4709	1829.75	116.32	72.7794
1127	AV13237	1829	Sight	Right	AOWL	-22.7256	1829.75	117.971	71.9257
1128	AV13237	1829	Sight	Right	AOWL	-22.4987	1829.76	119.141	73.5393
1129	AV13237	1829	Sight	Right	AOWL	-23.847	1829.77	121.343	73.0448
1130	AV13237	1829	Sight	Right	AOWL	-21.9291	1829.79	123.048	78.5651
1131	AV13237	1829	Sight	Right	AOWL	-29.0096	1829.81	133.545	74.8849
1132	AV13237	1829	Sight	Right	AOWL	-33.1354	1829.83	139.822	72.8946
1133	AV13237	1829	Sight	Right	AOWL	-33.7876	1829.83	140.754	72.5263
1134	AV13237	1829	Sight	Right	AOWL	-34.0642	1829.83	141.614	72.8217
1135	AV13237	1829	Sight	Right	AOWL	-35.4856	1829.84	143.767	72.1304
1136	AV13237	1829	Sight	Right	AOWL	-35.3676	1829.84	144.799	73.3931
1137	AV13237	1829	Sight	Right	AOWL	-35.0946	1829.88	149.222	78.3316
1138	AV13237	1829	Sight	Right	AOWL	-35.9636	1829.89	151.27	78.6376
1139	AV13237	1829	Sight	Right	AOWL	-36.0434	1829.9	152.381	79.5964
1140	AV13237	1829	Sight	Right	AOWL	-35.9241	1829.91	152.423	79.8802
1141	AV13237	1829	Sight	Right	AOWL	-36.1718	1829.92	153.7	80.6632
1142	AV13237	1829	Sight	Right	AOWL	-36.3241	1829.92	154.001	80.6615
1143	AV13237	1829	Sight	Right	AOWL	-36.5178	1829.93	154.639	80.9018
1144	AV13237	1829	Sight	Right	AOWL	-36.354	1829.93	154.742	81.3282
1145	AV13237	1829	Sight	Right	AOWL	-36.3683	1829.93	155.182	81.7362
1146	AV13237	1829	Sight	Right	AOWL	-36.4103	1829.96	156.607	83.0666
1147	AV13237	1829	Sight	Right	AOWL	-36.5868	1829.96	156.276	82.4125
1148	AV00395	1829	Strike	Right	AOWL	15.2215	1829.87	99.693	129.358
1149	AV00395	1829	Strike	Right	AOWL	12.8836	1829.96	110.405	135.336
1150	AV06472	1829	Strike	Right	AOWL	16.2089	1829.99	105.881	137.521
1151	AV00395	1829	Strike	Right	AOWL	14.0198	1829.77	84.6472	112.037
1152	AV00395	1829	Strike	Right	AOWL	13.6816	1829.81	91.299	117.972
1153	AV00395	1829	Strike	Right	AOWL	15.122	1829.84	94.8297	124.348
1154	AV00395	1829	Strike	Right	AOWL	15.345	1829.84	95.9719	125.923
1155	AV00395	1829	Strike	Right	AOWL	15.1329	1829.86	98.7825	128.284
1156	AV00395	1829	Strike	Right	AOWL	14.3964	1829.87	101.582	129.588
1157	AV00395	1829	Strike	Right	AOWL	13.7451	1829.89	104.563	131.248
1158	AV00395	1829	Strike	Right	AOWL	12.5747	1829.96	111.261	135.565
1159	AV05893	1829	Strike	Right	AOWL	23.8457	1829.07	98.0028	144.894
1160	AV05893	1829	Strike	Right	AOWL	23.8457	1829.08	96.5515	143.466
1161	AV05893	1829	Strike	Right	AOWL	23.8457	1829.09	95.5483	142.478
1162	AV05893	1829	Strike	Right	AOWL	23.8803	1829.1	93.4862	140.515
1163	AV05893	1829	Strike	Right	AOWL	23.7023	1829.12	89.0142	135.753
1164	AV05893	1829	Strike	Right	AOWL	23.8673	1829.14	85.5917	132.696
1165	AV05893	1829	Strike	Right	AOWL	23.8672	1829.14	83.8198	130.943
1166	AV05893	1829	Strike	Right	AOWL	23.8674	1829.15	83.2246	130.354
1167	AV05894	1829	Strike	Right	AOWL	12.7059	1829.83	95.4512	120.177
1168	AV05894	1829	Strike	Right	AOWL	15.9484	1829.86	95.8614	127.042
1169	AV05894	1829	Strike	Right	AOWL	15.1594	1829.91	105.671	135.157
1170	AV06472	1829	Strike	Right	AOWL	13.814	1829.78	86.2686	113.241
1171	AV06472	1829	Strike	Right	AOWL	14.6782	1829.8	88.6355	117.322
1172	AV06472	1829	Strike	Right	AOWL	14.9453	1829.81	89.7933	119.004
1173	AV06472	1829	Strike	Right	AOWL	14.6289	1829.85	97.0813	125.597
1174	AV06472	1829	Strike	Right	AOWL	15.3242	1829.85	96.8722	126.773
1175	AV06472	1829	Strike	Right	AOWL	13.8862	1829.86	100.048	127.055
1176	AV06472	1829	Strike	Right	AOWL	14.4639	1829.87	100.686	128.837
1177	AV06472	1829	Strike	Right	AOWL	13.857	1829.87	101.957	128.889
1178	AV06472	1829	Strike	Right	AOWL	14.0648	1829.89	103.943	131.275
1179	AV06472	1829	Strike	Right	AOWL	16.3961	1829.94	106.565	138.512
1180	AV06472	1829	Strike	Right	AOWL	15.7405	1829.96	107.035	137.692
1181	AV08910	1830	Sight	Finback	AOWL	-12.3167	1830.74	103.345	78.6863
1182	AV08910	1830	Sight	Finback	AOWL	-12.1245	1830.74	103.528	79.2489
1183	AV08910	1830	Sight	Finback	AOWL	5.63106	1830.82	97.1154	107.943
1184	AV08910	1830	Sight	Finback	AOWL	19.6733	1830.87	97.3395	135.871
1185	AV08910	1830	Sight	Finback	AOWL	20.61	1830.88	97.5042	137.89
1186	AV08910	1830	Sight	Finback	AOWL	25.5307	1830.91	103.831	153.119
1187	AV11755	1830	Sight	Finback	AOWL	-34.5663	1830.84	141.278	72.5984
1188	AV11755	1830	Sight	Finback	AOWL	-14.934	1830.88	123.867	94.1034
1189	AV11755	1830	Sight	Finback	AOWL	16.0672	1830.98	105.474	136.844
1190	AV11755	1830	Sight	Finback	AOWL	16.0672	1830.98	105.474	136.844
1191	AV14071	1830	Sight	Finback	AOWL	10.9802	1830.66	68.6718	91.1997
1192	AV14071	1830	Sight	Finback	AOWL	23.6775	1830.95	111.11	156.615
1193	AV14071	1830	Sight	Finback	AOWL	11.2318	1830.99	111.289	132.963
1194	AV11755	1830	Sight	Humpback	AOWL	16.0672	1830.98	105.474	136.844
1195	AV08910	1830	Sight	Right	AOWL	13.9902	1830.86	97.4226	124.699
1196	AV08910	1830	Sight	Right	AOWL	15.2867	1830.86	97.3837	127.219
1197	AV08910	1830	Sight	Right	AOWL	19.6733	1830.87	97.3395	135.871
1198	AV08910	1830	Sight	Right	AOWL	23.8086	1830.9	101.221	147.909
1199	AV13237	1830	Strike	Right	AOWL	-35.4849	1830.04	152.836	81.2533
1200	AV09262	1830	Strike	Right	AOWL	13.0643	1830.04	105.543	130.989
1201	AV09262	1830	Strike	Right	AOWL	13.195	1830.06	104.286	130.016
1202	AV09262	1830	Strike	Right	AOWL	12.9355	1830.09	101.137	126.4
1203	AV13237	1830	Strike	Right	AOWL	-35.8623	1830.01	155.252	82.8675
1204	AV13237	1830	Strike	Right	AOWL	-35.8199	1830.02	154.684	82.3977
1205	AV13237	1830	Strike	Right	AOWL	20.0129	1830.23	68.9821	108.588
1206	AV09262	1830	Sight	Right	AOWL	15.0095	1830.02	106.91	136.156
1207	AV09262	1830	Sight	Right	AOWL	14.5755	1830.03	106.115	134.526
1208	AV09262	1830	Sight	Right	AOWL	12.933	1830.04	105.879	131.059
1209	AV09262	1830	Sight	Right	AOWL	12.4844	1830.06	104.38	128.701
1210	AV09262	1830	Sight	Right	AOWL	13.2587	1830.08	101.518	127.41
1211	AV09262	1830	Sight	Right	AOWL	14.3803	1830.12	95.2746	123.488
1212	AV09262	1830	Sight	Right	AOWL	15.0505	1830.12	94.3725	123.923
1213	AV09262	1830	Sight	Right	AOWL	19.3936	1830.21	73.1427	111.524
1214	AV09262	1830	Sight	Right	AOWL	19.5271	1830.21	72.5129	111.16
1215	AV09262	1830	Sight	Right	AOWL	19.8444	1830.22	71.7125	110.989
1216	AV09262	1830	Sight	Right	AOWL	20.5469	1830.24	65.834	106.507
1217	AV09262	1830	Sight	Right	AOWL	20.0885	1830.25	65.8062	105.57
1218	AV13237	1830	Sight	Right	AOWL	-35.8583	1830.02	155.153	82.7782
1219	AV13237	1830	Sight	Right	AOWL	-35.7324	1830.04	153.646	81.5548
1220	AV13237	1830	Sight	Right	AOWL	-35.176	1830.06	150.273	79.3584
1221	AV13237	1830	Sight	Right	AOWL	20.2242	1830.2	74.0228	114.036
1222	AV13237	1830	Sight	Right	AOWL	20.6414	1830.21	72.6323	113.473
1223	AV13237	1830	Sight	Right	AOWL	20.1357	1830.23	69.3847	109.234
1224	AV13237	1830	Sight	Right	AOWL	20.2862	1830.23	68.1861	108.331
1225	AV13237	1830	Sight	Right	AOWL	20.2517	1830.24	67.6937	107.771
1226	AV13237	1830	Sight	Right	AOWL	20.0703	1830.24	67.3564	107.074
1227	AV13237	1830	Sight	Right	AOWL	19.8622	1830.24	67.0545	106.361
1228	AV00395	1830	Strike	Right	AOWL	13.6844	1830.03	108.364	134.955
1229	AV00395	1830	Strike	Right	AOWL	12.795	1830.08	102.068	127.03
1230	AV00725	1830	Strike	Right	AOWL	-22.4317	1830.8	126.123	80.5988
1231	AV01367	1830	Strike	Right	AOWL	-24.6136	1830.79	125.975	76.1017
1232	AV01367	1830	Strike	Right	AOWL	-26.3721	1830.93	145.552	92.0656
1233	AV01367	1830	Strike	Right	AOWL	-27.0633	1830.94	147.035	92.167
1234	AV05894	1830	Strike	Right	AOWL	24.2938	1830.19	74.0029	122.048
1235	AV06472	1830	Strike	Right	AOWL	24.2939	1830.22	65.9526	114.029
1236	AV06473	1830	Strike	Right	AOWL	-23.7102	1830.9	141.34	93.1599
1237	AV06473	1830	Strike	Right	AOWL	-24.7661	1830.95	145.661	95.3724
1238	AV00395	1830	Strike	Right	AOWL	13.4371	1830	109.766	135.832
1239	AV00395	1830	Strike	Right	AOWL	13.0247	1830.01	109.902	135.152
1240	AV00395	1830	Strike	Right	AOWL	13.3646	1830.03	108.007	133.976
1241	AV00395	1830	Strike	Right	AOWL	12.0825	1830.04	107.62	131.069
1242	AV00395	1830	Strike	Right	AOWL	12.0821	1830.04	107.336	130.79
1243	AV00395	1830	Strike	Right	AOWL	12.3956	1830.05	106.865	130.944
1244	AV00395	1830	Strike	Right	AOWL	12.2826	1830.06	106.316	130.183
1245	AV00395	1830	Strike	Right	AOWL	12.1103	1830.07	104.596	128.157
1246	AV00395	1830	Strike	Right	AOWL	12.1439	1830.07	103.706	127.351
1247	AV00725	1830	Strike	Right	AOWL	-23.6706	1830.78	123.557	75.5831
1248	AV00725	1830	Strike	Right	AOWL	-23.2202	1830.79	124.631	77.5421
1249	AV00725	1830	Strike	Right	AOWL	-22.6767	1830.83	131.085	85.0441
1250	AV00725	1830	Strike	Right	AOWL	-22.5199	1830.84	131.278	85.5496
1251	AV00725	1830	Strike	Right	AOWL	-22.8116	1830.85	133.36	87.0313
1252	AV00725	1830	Strike	Right	AOWL	-24.1468	1830.88	138.801	89.7725
1253	AV00725	1830	Strike	Right	AOWL	-24.4111	1830.88	139.433	89.8719
1254	AV00725	1830	Strike	Right	AOWL	-25.346	1830.89	142.021	90.5784
1255	AV00725	1830	Strike	Right	AOWL	-25.2465	1830.9	142.135	90.8917
1256	AV00725	1830	Strike	Right	AOWL	-25.3619	1830.92	144.492	93.0139
1257	AV00725	1830	Strike	Right	AOWL	-25.5291	1830.93	145.269	93.4541
1258	AV00725	1830	Strike	Right	AOWL	-25.3026	1830.93	145.323	93.9577
1259	AV00725	1830	Strike	Right	AOWL	-25.6881	1830.94	145.732	93.6169
1260	AV00725	1830	Strike	Right	AOWL	-26.0105	1830.95	146.256	93.493
1261	AV01367	1830	Strike	Right	AOWL	-16.0105	1830.72	105.877	73.239
1262	AV01367	1830	Strike	Right	AOWL	-24.6193	1830.78	124.571	74.6956
1263	AV01367	1830	Strike	Right	AOWL	-24.3846	1830.79	126.207	76.7893
1264	AV01367	1830	Strike	Right	AOWL	-24.8831	1830.83	132.639	82.1969
1265	AV01367	1830	Strike	Right	AOWL	-26.1577	1830.84	135.928	82.9245
1266	AV01367	1830	Strike	Right	AOWL	-27.0116	1830.87	140.564	85.8259
1267	AV01367	1830	Strike	Right	AOWL	-26.7367	1830.88	141.817	87.6221
1268	AV01367	1830	Strike	Right	AOWL	-26.3457	1830.89	142.438	89.0164
1269	AV01367	1830	Strike	Right	AOWL	-26.2959	1830.9	142.778	89.4498
1270	AV01367	1830	Strike	Right	AOWL	-26.4633	1830.9	143.282	89.6158
1271	AV01367	1830	Strike	Right	AOWL	-28.0816	1830.93	147.565	90.6615
1272	AV01367	1830	Strike	Right	AOWL	-27.1945	1830.95	147.367	92.2439
1273	AV01367	1830	Strike	Right	AOWL	-27.2612	1830.95	147.598	92.3409
1274	AV05894	1830	Strike	Right	AOWL	23.8535	1830.09	95.6784	142.622
1275	AV05894	1830	Strike	Right	AOWL	24.2941	1830.13	87.9896	135.911
1276	AV05894	1830	Strike	Right	AOWL	24.2939	1830.19	74.6229	122.665
1277	AV05894	1830	Strike	Right	AOWL	23.8534	1830.21	70.026	117.219
1278	AV05894	1830	Strike	Right	AOWL	23.8534	1830.24	63.3541	110.56
1279	AV05895	1830	Strike	Right	AOWL	12.8589	1830.9	105.443	130.372
1280	AV05895	1830	Strike	Right	AOWL	13.5706	1830.94	108.11	134.443
1281	AV06472	1830	Strike	Right	AOWL	17.0185	1830.02	104.626	137.898
1282	AV06472	1830	Strike	Right	AOWL	17.0342	1830.02	104.242	137.555
1283	AV06472	1830	Strike	Right	AOWL	24.5409	1830.14	83.5803	132.042
1284	AV06472	1830	Strike	Right	AOWL	24.5731	1830.15	82.3679	130.905
1285	AV06472	1830	Strike	Right	AOWL	24.7624	1830.17	77.3078	126.264
1286	AV06472	1830	Strike	Right	AOWL	24.336	1830.19	73.9605	122.091
1287	AV06472	1830	Strike	Right	AOWL	24.4583	1830.2	70.1003	118.495
1288	AV06472	1830	Strike	Right	AOWL	22.4207	1830.26	60.4989	104.877
1289	AV06473	1830	Strike	Right	AOWL	-24.5405	1830.79	126.256	76.5324
1290	AV06473	1830	Strike	Right	AOWL	-25.2277	1830.8	128.702	77.5961
1291	AV06473	1830	Strike	Right	AOWL	-25.4151	1830.81	129.325	77.8422
1292	AV06473	1830	Strike	Right	AOWL	-25.3697	1830.83	132.374	80.9609
1293	AV06473	1830	Strike	Right	AOWL	-27.9277	1830.83	136.226	79.6864
1294	AV06473	1830	Strike	Right	AOWL	-27.7875	1830.84	137.677	81.4087
1295	AV06473	1830	Strike	Right	AOWL	-27.7117	1830.85	138.133	82.0089
1296	AV06473	1830	Strike	Right	AOWL	-25.9023	1830.87	139.955	87.4169
1297	AV06473	1830	Strike	Right	AOWL	-23.8803	1830.88	139.146	90.6383
1298	AV06473	1830	Strike	Right	AOWL	-23.8571	1830.88	139.726	91.2629
1299	AV06473	1830	Strike	Right	AOWL	-23.9477	1830.92	143.202	94.5359
1300	AV06473	1830	Strike	Right	AOWL	-25.7944	1830.93	145.75	93.3972
1301	AV06473	1830	Strike	Right	AOWL	-25.6159	1830.93	145.737	93.741
1302	AV06473	1830	Strike	Right	AOWL	-25.1815	1830.94	145.662	94.5283
1303	AV06473	1830	Strike	Right	AOWL	-24.7668	1830.96	145.743	95.4548
1304	AV02143	1831	Sight	Finback	AOWL	13.375	1831.78	86.384	112.521
1305	AV02143	1831	Sight	Finback	AOWL	6.8924	1831.57	64.1635	77.558
1306	AV02143	1831	Sight	Finback	AOWL	7.10302	1831.57	64.1728	77.98
1307	AV02143	1831	Sight	Finback	AOWL	7.62164	1831.58	63.8076	78.631
1308	AV02143	1831	Sight	Finback	AOWL	11.3002	1831.76	84.566	106.599
1309	AV02143	1831	Sight	Finback	AOWL	3.94351	1831.84	101.19	108.638
1310	AV02143	1831	Sight	Finback	AOWL	3.05753	1831.85	103.377	109.094
1311	AV02143	1831	Sight	Finback	AOWL	2.77518	1831.85	103.832	109.005
1312	AV02143	1831	Sight	Finback	AOWL	2.5882	1831.86	104.222	109.039
1313	AV02143	1831	Sight	Finback	AOWL	3.81475	1831.91	108.032	115.432
1314	AV02143	1831	Sight	Finback	AOWL	5.22357	1831.93	107.095	117.449
1315	AV02143	1831	Sight	Finback	AOWL	4.77504	1831.99	108.85	118.256
1316	AV07157	1831	Sight	Finback	AOWL	3.02304	1831.87	105.442	111.104
1317	AV07157	1831	Sight	Finback	AOWL	3.26668	1831.88	105.745	111.998
1318	AV07157	1831	Sight	Finback	AOWL	4.8067	1831.91	106.812	116.265
1319	AV07157	1831	Sight	Finback	AOWL	5.07853	1831.92	106.68	116.695
1320	AV07157	1831	Sight	Finback	AOWL	5.37159	1831.94	107.5	118.143
1321	AV07157	1831	Sight	Finback	AOWL	5.65155	1831.98	107.812	119.102
1322	AV11281	1831	Sight	Finback	AOWL	-28.5299	1831.83	133.534	76.8241
1323	AV11755	1831	Sight	Finback	AOWL	29.235	1831.03	109.733	166.325
1324	AV11755	1831	Sight	Finback	AOWL	7.34682	1831.14	94.1239	108.567
1325	AV11755	1831	Sight	Finback	AOWL	6.41616	1831.15	94.4399	107.05
1326	AV11755	1831	Sight	Finback	AOWL	4.34326	1831.21	86.7269	95.1759
1327	AV11755	1831	Sight	Finback	AOWL	3.87302	1831.25	82.4817	90.009
1328	AV11755	1831	Sight	Finback	AOWL	4.04921	1831.25	81.9379	89.8314
1329	AV11755	1831	Sight	Finback	AOWL	4.28459	1831.26	80.5804	89.0009
1330	AV11755	1831	Sight	Finback	AOWL	2.05133	1831.27	81.0752	84.9988
1331	AV11755	1831	Sight	Finback	AOWL	1.74998	1831.27	81.0295	84.3452
1332	AV11755	1831	Sight	Finback	AOWL	6.91235	1831.46	55.1318	69.4859
1333	AV11755	1831	Sight	Finback	AOWL	7.42946	1831.47	55.2933	70.6552
1334	AV11755	1831	Sight	Finback	AOWL	8.70073	1831.48	55.5762	73.3903
1335	AV11755	1831	Sight	Finback	AOWL	6.96881	1831.49	56.0361	70.4942
1336	AV11755	1831	Sight	Finback	AOWL	6.01761	1831.49	55.9287	68.5464
1337	AV11755	1831	Sight	Finback	AOWL	4.74015	1831.5	57.8182	67.8867
1338	AV11755	1831	Sight	Finback	AOWL	4.48612	1831.51	58.2199	67.7811
1339	AV11755	1831	Sight	Finback	AOWL	1.05914	1831.63	73.375	76.0992
1340	AV11755	1831	Sight	Finback	AOWL	3.85573	1831.76	89.814	98.0791
1341	AV11755	1831	Sight	Finback	AOWL	15.227	1831.98	98.1945	128.684
1342	AV02143	1831	Sight	Humpback	AOWL	7.10302	1831.57	64.1728	77.98
1343	AV02143	1831	Sight	Humpback	AOWL	7.62164	1831.58	63.8076	78.631
1344	AV02143	1831	Sight	Humpback	AOWL	16.5098	1831.72	73.2972	105.684
1345	AV02143	1831	Sight	Humpback	AOWL	3.81475	1831.91	108.032	115.432
1346	AV02143	1831	Sight	Humpback	AOWL	5.22357	1831.93	107.095	117.449
1347	AV02143	1831	Sight	Right	AOWL	16.5098	1831.72	73.2972	105.684
1348	AV07157	1831	Sight	Right	AOWL	3.02304	1831.87	105.442	111.104
1349	AV11281	1831	Sight	Right	AOWL	19.6527	1831.99	105.269	143.712
1350	AV03056	1831	Strike	Right	AOWL	-29.2082	1831.99	150.43	91.2825
1351	AV03056	1831	Strike	Right	AOWL	-25.848	1831.81	129.948	77.5849
1352	AV03056	1831	Strike	Right	AOWL	-25.8236	1831.9	143.881	91.46
1353	AV03056	1831	Strike	Right	AOWL	-29.0167	1831.97	150.4	91.6209
1354	AV03056	1831	Strike	Right	AOWL	-12.7506	1831.7	98.8843	72.7722
1355	AV03056	1831	Strike	Right	AOWL	-15.0441	1831.72	104.798	74.0963
1356	AV03056	1831	Strike	Right	AOWL	-14.3634	1831.73	105.921	76.5897
1357	AV03056	1831	Strike	Right	AOWL	-14.4516	1831.75	108.813	79.2907
1358	AV03056	1831	Strike	Right	AOWL	-15.8439	1831.76	112.5	80.1873
1359	AV03056	1831	Strike	Right	AOWL	-26.6576	1831.82	133.049	79.0506
1360	AV03056	1831	Strike	Right	AOWL	-26.1365	1831.82	132.901	79.945
1361	AV03056	1831	Strike	Right	AOWL	-26.5445	1831.83	133.783	80.006
1362	AV03056	1831	Strike	Right	AOWL	-26.2116	1831.84	135.147	82.0252
1363	AV03056	1831	Strike	Right	AOWL	-26.1568	1831.84	135.451	82.4386
1364	AV03056	1831	Strike	Right	AOWL	-26.7726	1831.85	137.943	83.6788
1365	AV03056	1831	Strike	Right	AOWL	-26.8504	1831.85	138.057	83.6468
1366	AV03056	1831	Strike	Right	AOWL	-26.5493	1831.86	139.504	85.6775
1367	AV03056	1831	Strike	Right	AOWL	-26.3063	1831.87	139.607	86.2646
1368	AV03056	1831	Strike	Right	AOWL	-25.8563	1831.87	140.059	87.6157
1369	AV03056	1831	Strike	Right	AOWL	-26.038	1831.88	141.628	88.7935
1370	AV03056	1831	Strike	Right	AOWL	-25.9894	1831.88	142.296	89.5527
1371	AV03056	1831	Strike	Right	AOWL	-26.4783	1831.89	143.073	89.3508
1372	AV03056	1831	Strike	Right	AOWL	-26.331	1831.91	144.87	91.4395
1373	AV03056	1831	Strike	Right	AOWL	-25.9656	1831.92	145.468	92.7572
1374	AV03056	1831	Strike	Right	AOWL	-26.2307	1831.92	145.838	92.5997
1375	AV03056	1831	Strike	Right	AOWL	-27.2867	1831.94	147.862	92.519
1376	AV03056	1831	Strike	Right	AOWL	-26.2872	1831.95	147.396	94.0577
1377	AV03056	1831	Strike	Right	AOWL	-26.5976	1831.96	147.874	93.9128
1378	AV03056	1831	Strike	Right	AOWL	-26.025	1831.96	147.516	94.7002
1379	AV03056	1831	Strike	Right	AOWL	-26.2659	1831.96	147.705	94.4128
1380	AV03056	1831	Strike	Right	AOWL	-26.1271	1831.97	147.536	94.528
1381	AV03056	1831	Strike	Right	AOWL	-28.8493	1831.98	150.097	91.6634
1382	AV03056	1831	Strike	Right	AOWL	-14.6007	1831.74	107.575	77.7566
1383	AV03056	1831	Strike	Right	AOWL	-25.0446	1831.79	126.632	75.9019
1384	AV03056	1831	Strike	Right	AOWL	-25.838	1831.81	131.288	78.9374
1385	AV03056	1831	Strike	Right	AOWL	-26.2649	1831.82	132.149	78.9419
1386	AV03056	1831	Strike	Right	AOWL	-26.126	1831.87	140.337	87.3447
1387	AV03056	1831	Strike	Right	AOWL	-25.7903	1831.88	141.663	89.3232
1388	AV03056	1831	Strike	Right	AOWL	-26.0878	1831.9	144.011	91.0587
1389	AV03056	1831	Strike	Right	AOWL	-27.5508	1831.93	148.171	92.2836
1390	AV03056	1831	Sight	Right	AOWL	-12.5903	1831.7	98.286	72.4957
1391	AV03056	1831	Sight	Right	AOWL	-14.134	1831.71	102.97	74.0854
1392	AV03056	1831	Sight	Right	AOWL	-16.543	1831.72	105.837	72.132
1393	AV03056	1831	Sight	Right	AOWL	-13.7891	1831.72	104.009	75.8117
1394	AV03056	1831	Sight	Right	AOWL	-14.4508	1831.73	105.603	76.0792
1395	AV03056	1831	Sight	Right	AOWL	-14.1288	1831.74	107.588	78.7096
1396	AV03056	1831	Sight	Right	AOWL	-13.981	1831.75	109.29	80.7035
1397	AV03056	1831	Sight	Right	AOWL	-16.002	1831.76	113.087	80.4599
1398	AV03056	1831	Sight	Right	AOWL	-25.9981	1831.8	129.056	76.4049
1399	AV03056	1831	Sight	Right	AOWL	-26.3635	1831.81	131.393	77.9925
1400	AV03056	1831	Sight	Right	AOWL	-25.7395	1831.84	135.424	83.2439
1401	AV03056	1831	Sight	Right	AOWL	-26.0601	1831.84	136.331	83.5007
1402	AV03056	1831	Sight	Right	AOWL	-25.8099	1831.86	137.709	85.3663
1403	AV03056	1831	Sight	Right	AOWL	-26.8321	1831.86	139.011	84.6256
1404	AV03056	1831	Sight	Right	AOWL	-26.1036	1831.86	138.693	85.7599
1405	AV03056	1831	Sight	Right	AOWL	-26.2293	1831.92	145.987	92.7529
1406	AV03056	1831	Sight	Right	AOWL	-25.9941	1831.97	147.497	94.749
1407	AV03056	1831	Sight	Right	AOWL	-28.7039	1831.99	149.866	91.7275
1408	AV04518	1831	Sight	Right	AOWL	17.1918	1831.8	85.7189	119.425
1409	AV04518	1831	Sight	Right	AOWL	18.4272	1831.86	96.8897	132.263
1410	AV04518	1831	Sight	Right	AOWL	17.4404	1831.87	97.4564	130.896
1411	AV07157	1831	Sight	Right	AOWL	2.94423	1831.87	105.72	111.238
1412	AV08525	1831	Sight	Right	AOWL	26.5532	1831.03	107.276	158.579
1413	AV12290	1831	Sight	Right	AOWL	16.8708	1831.54	45.3276	78.3053
1414	AV12311	1831	Sight	Right	AOWL	15.4483	1831.82	90.9494	121.153
1415	AV12311	1831	Sight	Right	AOWL	17.8123	1831.83	91.1222	126.017
1416	AV12311	1831	Sight	Right	AOWL	18.861	1831.95	106.646	142.756
1417	AV12311	1831	Sight	Right	AOWL	17.6682	1831.96	106.728	140.502
1418	AV12311	1831	Sight	Right	AOWL	15.3751	1831.96	106.564	135.887
1419	AV12311	1831	Sight	Right	AOWL	14.9678	1831.96	106.418	134.966
1420	AV05895	1831	Strike	Right	AOWL	20.8304	1831.97	106.113	146.132
1421	AV06606	1831	Strike	Right	AOWL	-27.2927	1831.97	148.59	93.2613
1422	AV00396	1831	Strike	Right	AOWL	-36.3019	1831.89	150.864	77.5804
1423	AV00396	1831	Strike	Right	AOWL	-36.0054	1831.93	154.09	81.382
1424	AV00396	1831	Strike	Right	AOWL	-35.9428	1831.95	156.201	83.5764
1425	AV00396	1831	Strike	Right	AOWL	-36.06	1831.95	157.008	84.1343
1426	AV04222	1831	Strike	Right	AOWL	22.7123	1831.77	74.0908	119.178
1427	AV04222	1831	Strike	Right	AOWL	-35.1226	1831.83	143.035	72.103
1428	AV05895	1831	Strike	Right	AOWL	20.1126	1831.93	104.121	142.733
1429	AV06606	1831	Strike	Right	AOWL	-25.832	1831.85	137.144	84.7561
1430	AV06606	1831	Strike	Right	AOWL	-27.3751	1831.87	141.148	85.6716
1431	AV06606	1831	Strike	Right	AOWL	-27.5731	1831.98	148.74	92.8613
1432	AV00396	1831	Strike	Right	AOWL	-15.6717	1831.74	108.65	76.6886
1433	AV00396	1831	Strike	Right	AOWL	-14.6797	1831.75	109.131	79.1405
1434	AV00396	1831	Strike	Right	AOWL	-36.0394	1831.79	136.94	64.2345
1435	AV00396	1831	Strike	Right	AOWL	-35.5365	1831.8	138.08	66.3784
1436	AV00396	1831	Strike	Right	AOWL	-35.5369	1831.8	138.516	66.8111
1437	AV00396	1831	Strike	Right	AOWL	-35.2783	1831.81	139.492	68.3003
1438	AV00396	1831	Strike	Right	AOWL	-35.5384	1831.81	140.187	68.4726
1439	AV00396	1831	Strike	Right	AOWL	-36.4589	1831.84	144.826	71.2477
1440	AV00396	1831	Strike	Right	AOWL	-36.4584	1831.85	145.988	72.4035
1441	AV00396	1831	Strike	Right	AOWL	-36.2248	1831.85	146.348	73.2338
1442	AV00396	1831	Strike	Right	AOWL	-36.2146	1831.86	146.654	73.5608
1443	AV00396	1831	Strike	Right	AOWL	-36.2051	1831.86	146.964	73.8892
1444	AV00396	1831	Strike	Right	AOWL	-35.7361	1831.86	147.023	74.8913
1445	AV00396	1831	Strike	Right	AOWL	-36.1672	1831.87	148.512	75.5103
1446	AV00396	1831	Strike	Right	AOWL	-36.5322	1831.87	149.194	75.4614
1447	AV00396	1831	Strike	Right	AOWL	-36.3804	1831.88	149.456	76.0217
1448	AV00396	1831	Strike	Right	AOWL	-36.3788	1831.88	149.771	76.3376
1449	AV00396	1831	Strike	Right	AOWL	-36.3769	1831.88	150.075	76.6446
1450	AV00396	1831	Strike	Right	AOWL	-36.31	1831.89	150.608	77.3084
1451	AV00396	1831	Strike	Right	AOWL	-36.3745	1831.9	151.536	78.1034
1452	AV00396	1831	Strike	Right	AOWL	-36.4214	1831.9	152.328	78.7908
1453	AV00396	1831	Strike	Right	AOWL	-35.9939	1831.91	152.311	79.631
1454	AV00396	1831	Strike	Right	AOWL	-35.9987	1831.91	152.588	79.8964
1455	AV00396	1831	Strike	Right	AOWL	-36.2129	1831.91	153.055	79.9343
1456	AV00396	1831	Strike	Right	AOWL	-35.9986	1831.92	153.262	80.5701
1457	AV00396	1831	Strike	Right	AOWL	-36.0055	1831.92	153.723	81.0151
1458	AV00396	1831	Strike	Right	AOWL	-36.2235	1831.93	154.518	81.3724
1459	AV00726	1831	Strike	Right	AOWL	-33.4064	1831.73	124.028	56.6161
1460	AV00726	1831	Strike	Right	AOWL	-36.8995	1831.76	133.634	59.2382
1461	AV00726	1831	Strike	Right	AOWL	-36.8208	1831.78	136.085	61.845
1462	AV00726	1831	Strike	Right	AOWL	-36.8215	1831.79	136.943	62.6993
1463	AV00726	1831	Strike	Right	AOWL	-32.9388	1831.8	135.689	69.1955
1464	AV00726	1831	Strike	Right	AOWL	-32.9391	1831.81	136.111	69.6145
1465	AV00726	1831	Strike	Right	AOWL	-32.9401	1831.81	136.949	70.4464
1466	AV00726	1831	Strike	Right	AOWL	-32.9406	1831.81	137.365	70.8593
1467	AV00726	1831	Strike	Right	AOWL	-32.941	1831.82	137.779	71.2702
1468	AV00726	1831	Strike	Right	AOWL	-32.9476	1831.86	143.636	77.0796
1469	AV00726	1831	Strike	Right	AOWL	-32.9495	1831.87	145.386	78.8153
1470	AV00726	1831	Strike	Right	AOWL	-32.9501	1831.87	145.721	79.1467
1471	AV00726	1831	Strike	Right	AOWL	-32.9522	1831.89	147.302	80.7148
1472	AV00726	1831	Strike	Right	AOWL	-32.9525	1831.89	147.598	81.0094
1473	AV00726	1831	Strike	Right	AOWL	-32.9544	1831.9	148.715	82.1167
1474	AV00726	1831	Strike	Right	AOWL	-32.9549	1831.9	148.975	82.3748
1475	AV00726	1831	Strike	Right	AOWL	-32.9575	1831.92	150.362	83.753
1476	AV00726	1831	Strike	Right	AOWL	-34.2119	1831.92	151.549	82.444
1477	AV00726	1831	Strike	Right	AOWL	-34.2129	1831.93	151.919	82.812
1478	AV04222	1831	Strike	Right	AOWL	-35.1185	1831.81	139.114	68.2127
1479	AV04222	1831	Strike	Right	AOWL	-35.9097	1831.86	148.656	76.1071
1480	AV04222	1831	Strike	Right	AOWL	-33.8621	1831.88	148.719	80.2615
1481	AV04222	1831	Strike	Right	AOWL	-33.8629	1831.88	149.383	80.9194
1482	AV04222	1831	Strike	Right	AOWL	-36.0167	1831.9	152.479	79.7105
1483	AV04222	1831	Strike	Right	AOWL	-36.0173	1831.9	153.048	80.2755
1484	AV04222	1831	Strike	Right	AOWL	-36.0178	1831.9	153.321	80.546
1485	AV04222	1831	Strike	Right	AOWL	-33.9083	1831.91	152.156	83.5889
1486	AV04222	1831	Strike	Right	AOWL	-33.9098	1831.92	152.847	84.2752
1487	AV04222	1831	Strike	Right	AOWL	-36.1109	1831.94	156.934	83.949
1488	AV04222	1831	Strike	Right	AOWL	-36.1117	1831.95	157.163	84.1775
1489	AV04222	1831	Strike	Right	AOWL	-36.1136	1831.96	157.484	84.5
1490	AV04222	1831	Strike	Right	AOWL	-36.1149	1831.97	157.603	84.6221
1491	AV04222	1831	Strike	Right	AOWL	-36.7439	1831.99	158.206	83.9839
1492	AV05895	1831	Strike	Right	AOWL	15.6413	1831.01	106.697	137.196
1493	AV05895	1831	Strike	Right	AOWL	16.5091	1831.02	105.725	137.961
1494	AV05895	1831	Strike	Right	AOWL	26.1551	1831.11	92.1661	143.717
1495	AV05895	1831	Strike	Right	AOWL	20.532	1831.23	69.1596	109.767
1496	AV05895	1831	Strike	Right	AOWL	15.7243	1831.3	62.302	93.3821
1497	AV05895	1831	Strike	Right	AOWL	15.725	1831.31	60.578	91.6475
1498	AV05895	1831	Strike	Right	AOWL	15.7267	1831.33	56.493	87.5281
1499	AV05895	1831	Strike	Right	AOWL	18.2598	1831.88	101.11	136.074
1500	AV05895	1831	Strike	Right	AOWL	20.4199	1831.94	104.975	144.182
1501	AV05895	1831	Strike	Right	AOWL	21.0477	1831.94	105.23	145.667
1502	AV05895	1831	Strike	Right	AOWL	21.4211	1831.94	105.386	146.562
1503	AV05895	1831	Strike	Right	AOWL	21.1823	1831.96	105.884	146.587
1504	AV05895	1831	Strike	Right	AOWL	20.8304	1831.97	106.093	146.111
1505	AV06473	1831	Strike	Right	AOWL	24.3458	1831.11	91.8254	139.801
1506	AV06473	1831	Strike	Right	AOWL	24.346	1831.11	91.2731	139.257
1507	AV06473	1831	Strike	Right	AOWL	24.5322	1831.15	82.9327	131.387
1508	AV06473	1831	Strike	Right	AOWL	24.4737	1831.16	80.0899	128.452
1509	AV06606	1831	Strike	Right	AOWL	-11.3063	1831.72	100.604	77.3792
1510	AV06606	1831	Strike	Right	AOWL	-11.4557	1831.72	101.213	77.6858
1511	AV06606	1831	Strike	Right	AOWL	-11.5673	1831.73	103.656	79.8987
1512	AV06606	1831	Strike	Right	AOWL	-10.7881	1831.74	103.34	81.1411
1513	AV06606	1831	Strike	Right	AOWL	-26.8611	1831.82	132.55	78.1588
1514	AV06606	1831	Strike	Right	AOWL	-26.8431	1831.83	134.135	79.7587
1515	AV06606	1831	Strike	Right	AOWL	-26.528	1831.84	135.781	82.0274
1516	AV06606	1831	Strike	Right	AOWL	-26.5435	1831.84	136.331	82.5387
1517	AV06606	1831	Strike	Right	AOWL	-26.544	1831.84	136.743	82.9469
1518	AV06606	1831	Strike	Right	AOWL	-25.9361	1831.86	139.195	86.5848
1519	AV06606	1831	Strike	Right	AOWL	-27.2301	1831.87	141.484	86.291
1520	AV06606	1831	Strike	Right	AOWL	-27.3787	1831.88	142.431	86.9323
1521	AV06606	1831	Strike	Right	AOWL	-28.159	1831.89	144.704	87.6295
1522	AV06606	1831	Strike	Right	AOWL	-26.7822	1831.91	145.042	90.7105
1523	AV06606	1831	Strike	Right	AOWL	-26.7827	1831.91	145.304	90.9704
1524	AV06606	1831	Strike	Right	AOWL	-26.8795	1831.91	145.843	91.3153
1525	AV06606	1831	Strike	Right	AOWL	-27.2944	1831.92	146.536	91.1817
1526	AV06606	1831	Strike	Right	AOWL	-26.8971	1831.92	146.498	91.9327
1527	AV06606	1831	Strike	Right	AOWL	-26.5263	1831.93	146.406	92.5795
1528	AV06606	1831	Strike	Right	AOWL	-27.7484	1831.94	148.318	92.0528
1529	AV06606	1831	Strike	Right	AOWL	-27.2031	1831.94	148.096	92.9156
1530	AV06606	1831	Strike	Right	AOWL	-27.6574	1831.95	148.833	92.7479
1531	AV06606	1831	Strike	Right	AOWL	-27.8097	1831.96	148.989	92.6077
1532	AV06606	1831	Strike	Right	AOWL	-27.2269	1831.96	148.281	93.0727
1533	AV06606	1831	Strike	Right	AOWL	-27.1361	1831.96	148.252	93.2268
1534	AV06606	1831	Strike	Right	AOWL	-27.2232	1831.98	148.484	93.2977
1535	AV02143	1832	Sight	Finback	AOWL	3.5965	1832.01	109.472	116.513
1536	AV02143	1832	Sight	Finback	AOWL	2.12625	1832.03	109.727	113.861
1537	AV02143	1832	Sight	Finback	AOWL	1.82555	1832.04	109.277	112.811
1538	AV02143	1832	Sight	Finback	AOWL	5.74251	1832.55	58.9486	71.0817
1539	AV02143	1832	Sight	Finback	AOWL	5.60035	1832.55	59.3226	71.1723
1540	AV02143	1832	Sight	Finback	AOWL	6.35289	1832.58	62.4596	75.7738
1541	AV02143	1832	Sight	Finback	AOWL	4.96243	1832.97	108.491	118.41
1542	AV07157	1832	Sight	Finback	AOWL	4.17741	1832.02	108.225	116.429
1543	AV07157	1832	Sight	Finback	AOWL	4.02341	1832.04	107.232	115.081
1544	AV07157	1832	Sight	Finback	AOWL	3.91159	1832.08	103.592	111.223
1545	AV07157	1832	Sight	Finback	AOWL	2.39178	1832.13	98.8028	103.338
1546	AV07157	1832	Sight	Finback	AOWL	2.32433	1832.14	97.514	101.896
1547	AV07157	1832	Sight	Finback	AOWL	1.79141	1832.23	86.7577	90.1614
1548	AV07157	1832	Sight	Finback	AOWL	4.60793	1832.45	57.7143	67.444
1549	AV07157	1832	Sight	Finback	AOWL	3.40469	1832.54	61.4627	68.8568
1550	AV07157	1832	Sight	Finback	AOWL	3.9716	1832.67	76.3596	84.8575
1551	AV09201	1832	Sight	Finback	AOWL	-26.28	1832.97	143.37	91.4789
1552	AV09201	1832	Sight	Finback	AOWL	-27.9766	1832.98	145.06	89.7786
1553	AV09201	1832	Sight	Finback	AOWL	-29.1651	1832.99	145.797	88.1413
1554	AV11281	1832	Sight	Finback	AOWL	20.9657	1832.01	104.451	145.511
1555	AV11281	1832	Sight	Finback	AOWL	24.273	1832.04	102.52	149.411
1556	AV11281	1832	Sight	Finback	AOWL	23.3928	1832.06	101.659	146.808
1557	AV11281	1832	Sight	Finback	AOWL	20.4348	1832.07	98.9115	138.322
1558	AV11281	1832	Sight	Finback	AOWL	11.0806	1832.1	97.4297	119.174
1559	AV11281	1832	Sight	Finback	AOWL	9.68338	1832.11	97.5833	116.579
1560	AV11281	1832	Sight	Finback	AOWL	8.40933	1832.11	98.0702	114.557
1561	AV11281	1832	Sight	Finback	AOWL	8.58916	1832.36	59.7896	77.3547
1562	AV11281	1832	Sight	Finback	AOWL	6.32674	1832.42	56.509	69.6669
1563	AV11281	1832	Sight	Finback	AOWL	4.58774	1832.48	57.4583	67.1944
1564	AV11281	1832	Sight	Finback	AOWL	4.39924	1832.49	57.667	67.0418
1565	AV11281	1832	Sight	Finback	AOWL	5.46882	1832.5	57.3045	68.8096
1566	AV11281	1832	Sight	Finback	AOWL	3.94169	1832.6	66.444	74.9156
1567	AV11755	1832	Sight	Finback	AOWL	13.2868	1832.13	88.4533	114.82
1568	AV11755	1832	Sight	Finback	AOWL	11.1545	1832.14	88.486	110.604
1569	AV11755	1832	Sight	Finback	AOWL	0.340201	1832.44	63.0029	64.1447
1570	AV11755	1832	Sight	Finback	AOWL	1.34206	1832.47	61.2772	64.4729
1571	AV11755	1832	Sight	Finback	AOWL	1.3177	1832.47	61.3212	64.4705
1572	AV11755	1832	Sight	Finback	AOWL	2.84533	1832.6	66.4361	72.7703
1573	AV11755	1832	Sight	Finback	AOWL	5.62508	1832.68	75.6176	87.4476
1574	AV11755	1832	Sight	Finback	AOWL	11.7416	1832.88	98.6189	122.644
1575	AV11281	1832	Sight	Humpback	AOWL	11.0806	1832.1	97.4297	119.174
1576	AV11755	1832	Sight	Humpback	AOWL	-0.38057	1832.37	69.5396	69.0987
1577	AV11755	1832	Sight	Humpback	AOWL	-0.271872	1832.38	68.6415	68.4263
1578	AV11755	1832	Sight	Humpback	AOWL	11.9353	1832.88	97.9697	122.364
1579	AV11755	1832	Sight	Humpback	AOWL	11.7416	1832.88	98.6189	122.644
1580	AV11281	1832	Sight	Right	AOWL	22.4422	1832.01	104.255	147.513
1581	AV11281	1832	Sight	Right	AOWL	24.1769	1832.03	104.248	150.915
1582	AV11281	1832	Sight	Right	AOWL	26.2135	1832.04	105.849	156.502
1583	AV11281	1832	Sight	Right	AOWL	18.4509	1832.07	98.5123	134.051
1584	AV11281	1832	Sight	Right	AOWL	6.93139	1832.41	56.2951	70.6518
1585	AV11281	1832	Sight	Right	AOWL	6.32674	1832.42	56.509	69.6669
1586	AV00747	1832	Strike	Right	AOWL	-35.563	1832.86	146.018	74.2381
1587	AV00747	1832	Strike	Right	AOWL	-33.8797	1832.89	148.755	80.3098
1588	AV00747	1832	Strike	Right	AOWL	-33.7423	1832.9	149.758	81.5709
1589	AV00747	1832	Strike	Right	AOWL	-26.9297	1832.99	148.662	94.0539
1590	AV02502	1832	Strike	Right	AOWL	-35.0106	1832.84	143.61	72.9463
1591	AV02502	1832	Strike	Right	AOWL	-29.6438	1832.93	149.425	89.3838
1592	AV02502	1832	Strike	Right	AOWL	-26.9236	1833	148.583	93.9904
1593	AV04823	1832	Strike	Right	AOWL	-34.6686	1832.86	145.607	75.6235
1594	AV12753	1832	Strike	Right	AOWL	-31.4425	1832.93	150.858	87.233
1595	AV00747	1832	Strike	Right	AOWL	-36.5114	1832.77	133.579	59.9586
1596	AV00747	1832	Strike	Right	AOWL	-36.8751	1832.78	135.219	60.8703
1597	AV00747	1832	Strike	Right	AOWL	-37.2287	1832.81	140.314	65.2361
1598	AV00747	1832	Strike	Right	AOWL	-37.1412	1832.81	140.607	65.7046
1599	AV00747	1832	Strike	Right	AOWL	-37.2048	1832.81	141.131	66.0972
1600	AV00747	1832	Strike	Right	AOWL	-37.1468	1832.81	141.523	66.6013
1601	AV00747	1832	Strike	Right	AOWL	-37.2076	1832.82	142.433	67.3845
1602	AV00747	1832	Strike	Right	AOWL	-37.1516	1832.82	142.646	67.7151
1603	AV00747	1832	Strike	Right	AOWL	-37.1864	1832.83	143.639	68.6258
1604	AV00747	1832	Strike	Right	AOWL	-37.2413	1832.83	144.55	69.4194
1605	AV00747	1832	Strike	Right	AOWL	-35.4111	1832.86	146.281	74.8009
1606	AV00747	1832	Strike	Right	AOWL	-35.57	1832.86	146.828	75.026
1607	AV00747	1832	Strike	Right	AOWL	-34.5719	1832.88	147.843	78.0259
1608	AV00747	1832	Strike	Right	AOWL	-34.3022	1832.88	148.304	79.0183
1609	AV00747	1832	Strike	Right	AOWL	-34.1826	1832.89	148.728	79.6692
1610	AV00747	1832	Strike	Right	AOWL	-33.2365	1832.91	149.879	82.6967
1611	AV00747	1832	Strike	Right	AOWL	-30.8116	1832.92	149.667	87.2983
1612	AV00747	1832	Strike	Right	AOWL	-28.7683	1832.93	148.403	90.1118
1613	AV00747	1832	Strike	Right	AOWL	-30.1258	1832.94	151.023	89.9965
1614	AV00747	1832	Strike	Right	AOWL	-29.2339	1832.95	150.069	90.8419
1615	AV00747	1832	Strike	Right	AOWL	-27.34	1832.97	148.937	93.4993
1616	AV00747	1832	Strike	Right	AOWL	-26.7511	1833	148.431	94.1827
1617	AV02502	1832	Strike	Right	AOWL	-28.7775	1832.8	130.755	72.554
1618	AV02502	1832	Strike	Right	AOWL	-35.4642	1832.81	139.703	68.1549
1619	AV02502	1832	Strike	Right	AOWL	-35.051	1832.82	140.656	69.9205
1620	AV02502	1832	Strike	Right	AOWL	-35.1642	1832.83	141.658	70.6879
1621	AV02502	1832	Strike	Right	AOWL	-35.0368	1832.85	144.281	73.5657
1622	AV02502	1832	Strike	Right	AOWL	-34.9264	1832.87	146.196	75.696
1623	AV02502	1832	Strike	Right	AOWL	-34.5306	1832.87	146.254	76.5373
1624	AV02502	1832	Strike	Right	AOWL	-34.4656	1832.87	146.508	76.9209
1625	AV02502	1832	Strike	Right	AOWL	-34.6635	1832.87	146.98	76.9978
1626	AV02502	1832	Strike	Right	AOWL	-34.4418	1832.88	147.247	77.7125
1627	AV02502	1832	Strike	Right	AOWL	-34.0921	1832.88	147.991	79.1296
1628	AV02502	1832	Strike	Right	AOWL	-34.2762	1832.9	148.923	79.7075
1629	AV02502	1832	Strike	Right	AOWL	-34.0262	1832.9	148.963	80.2458
1630	AV02502	1832	Strike	Right	AOWL	-33.769	1832.91	149.381	81.1803
1631	AV12677	1832	Strike	Right	AOWL	-13.2514	1832.98	134.539	107.291
1632	AV12753	1832	Strike	Right	AOWL	-36.4062	1832.77	134.182	60.7468
1633	AV12753	1832	Strike	Right	AOWL	-36.3252	1832.82	141.769	68.4737
1634	AV12753	1832	Strike	Right	AOWL	-36.2476	1832.82	142.089	68.9472
1635	AV12753	1832	Strike	Right	AOWL	-36.41	1832.83	143.186	69.7101
1636	AV12753	1832	Strike	Right	AOWL	-36.4121	1832.83	144.025	70.5388
1637	AV12753	1832	Strike	Right	AOWL	-35.9682	1832.85	145.799	73.2077
1638	AV12753	1832	Strike	Right	AOWL	-35.4754	1832.86	146.054	74.4436
1639	AV12753	1832	Strike	Right	AOWL	-35.5443	1832.87	147.175	75.4216
1640	AV12753	1832	Strike	Right	AOWL	-35.5931	1832.87	147.642	75.7854
1641	AV12753	1832	Strike	Right	AOWL	-35.4143	1832.87	147.684	76.1888
1642	AV12753	1832	Strike	Right	AOWL	-34.794	1832.89	149.031	78.7627
1643	AV12753	1832	Strike	Right	AOWL	-34.8972	1832.89	149.153	78.7026
1644	AV12753	1832	Strike	Right	AOWL	-34.88	1832.9	149.779	79.344
1645	AV12753	1832	Strike	Right	AOWL	-32.863	1832.91	149.385	82.9739
1646	AV12753	1832	Strike	Right	AOWL	-31.3266	1832.92	148.993	85.6235
1647	AV12753	1832	Strike	Right	AOWL	-31.856	1832.92	149.787	85.3567
1648	AV12753	1832	Strike	Right	AOWL	-31.632	1832.93	150.334	86.3373
1649	AV12753	1832	Strike	Right	AOWL	-31.583	1832.93	150.827	86.9213
1650	AV12753	1832	Strike	Right	AOWL	-27.5545	1832.98	149.272	93.4065
1651	AV12753	1832	Strike	Right	AOWL	-27.7011	1832.98	149.006	92.8653
1652	AV12753	1832	Strike	Right	AOWL	-26.9523	1833	148.446	93.8021
1653	AV00747	1832	Strike	Right	AOWL	-36.8203	1832.77	134.23	59.9995
1654	AV00747	1832	Strike	Right	AOWL	-37.1528	1832.84	144.884	69.9274
1655	AV02502	1832	Strike	Right	AOWL	-35.017	1832.84	142.861	72.1885
1656	AV02502	1832	Strike	Right	AOWL	-35.224	1832.85	144.717	73.6318
1657	AV02502	1832	Strike	Right	AOWL	-33.8995	1832.91	149.648	81.1904
1658	AV12753	1832	Strike	Right	AOWL	-34.9545	1832.73	125.902	55.3979
1659	AV12753	1832	Strike	Right	AOWL	-37.3317	1832.81	141.324	66.0113
1660	AV12753	1832	Strike	Right	AOWL	-31.6419	1832.92	150.108	86.0931
1661	AV00747	1832	Sight	Right	AOWL	-36.8445	1832.78	136.111	61.8159
1662	AV00747	1832	Sight	Right	AOWL	-37.1733	1832.78	136.853	61.9001
1663	AV00747	1832	Sight	Right	AOWL	-37.3903	1832.8	139.994	64.5987
1664	AV00747	1832	Sight	Right	AOWL	-37.0859	1832.83	143.042	68.2366
1665	AV00747	1832	Sight	Right	AOWL	-35.7929	1832.85	145.507	73.2724
1666	AV00747	1832	Sight	Right	AOWL	-35.0322	1832.87	147.498	76.7574
1667	AV00747	1832	Sight	Right	AOWL	-34.7932	1832.88	147.796	77.5352
1668	AV00747	1832	Sight	Right	AOWL	-34.5008	1832.88	148.067	78.3914
1669	AV00747	1832	Sight	Right	AOWL	-34.0869	1832.89	148.768	79.9059
1670	AV00747	1832	Sight	Right	AOWL	-33.7168	1832.9	149.04	80.9123
1671	AV00747	1832	Sight	Right	AOWL	-33.4971	1832.9	149.529	81.8422
1672	AV00747	1832	Sight	Right	AOWL	-26.6965	1832.94	147.232	93.0644
1673	AV00747	1832	Sight	Right	AOWL	-29.5749	1832.95	150.45	90.5355
1674	AV00747	1832	Sight	Right	AOWL	-27.6193	1832.97	148.869	92.8819
1675	AV00747	1832	Sight	Right	AOWL	-26.8374	1832.98	148.429	94.0036
1676	AV00747	1832	Sight	Right	AOWL	-27.3437	1832.99	148.099	92.6972
1677	AV01149	1832	Sight	Right	AOWL	17.4687	1832.01	105.821	139.946
1678	AV01149	1832	Sight	Right	AOWL	26.6357	1832.05	104.286	155.799
1679	AV02502	1832	Sight	Right	AOWL	-22.4984	1832.78	121.336	75.7054
1680	AV02502	1832	Sight	Right	AOWL	-23.8044	1832.78	123.136	74.8894
1681	AV02502	1832	Sight	Right	AOWL	-27.1671	1832.79	127.66	72.6949
1682	AV02502	1832	Sight	Right	AOWL	-34.9779	1832.82	139.6	69.0243
1683	AV02502	1832	Sight	Right	AOWL	-34.7803	1832.82	139.863	69.6777
1684	AV02502	1832	Sight	Right	AOWL	-34.9404	1832.83	140.951	70.435
1685	AV02502	1832	Sight	Right	AOWL	-35.0149	1832.83	141.882	71.209
1686	AV02502	1832	Sight	Right	AOWL	-34.8173	1832.85	143.735	73.4583
1687	AV02502	1832	Sight	Right	AOWL	-34.9924	1832.86	145.48	74.8558
1688	AV02502	1832	Sight	Right	AOWL	-34.954	1832.86	145.914	75.3579
1689	AV02502	1832	Sight	Right	AOWL	-34.5994	1832.88	147.122	77.2717
1690	AV02502	1832	Sight	Right	AOWL	-34.261	1832.89	148.777	79.5739
1691	AV02502	1832	Sight	Right	AOWL	-34.3851	1832.89	148.884	79.4462
1692	AV02502	1832	Sight	Right	AOWL	-32.9879	1832.91	149.31	82.6688
1693	AV02502	1832	Sight	Right	AOWL	-31.5562	1832.92	149.823	85.9867
1694	AV02502	1832	Sight	Right	AOWL	-31.5668	1832.93	149.992	86.1356
1695	AV02502	1832	Sight	Right	AOWL	-28.1316	1832.94	148.923	91.893
1696	AV02502	1832	Sight	Right	AOWL	-28.7503	1832.96	150.122	91.8559
1697	AV02502	1832	Sight	Right	AOWL	-26.7979	1832.99	148.53	94.1844
1698	AV02502	1832	Sight	Right	AOWL	-26.4943	1832.99	148.211	94.4743
1699	AV04823	1832	Sight	Right	AOWL	-26.9997	1832.78	126.83	72.187
1700	AV04823	1832	Sight	Right	AOWL	-30.978	1832.79	131.77	69.1893
1701	AV04823	1832	Sight	Right	AOWL	-34.6701	1832.8	137.497	67.5301
1702	AV04823	1832	Sight	Right	AOWL	-34.9646	1832.81	138.195	67.6378
1703	AV04823	1832	Sight	Right	AOWL	-34.9113	1832.81	139.331	68.8783
1704	AV04823	1832	Sight	Right	AOWL	-35.1467	1832.82	139.908	68.9867
1705	AV04823	1832	Sight	Right	AOWL	-34.8999	1832.82	140.482	70.0499
1706	AV04823	1832	Sight	Right	AOWL	-35.641	1832.83	141.938	70.0246
1707	AV04823	1832	Sight	Right	AOWL	-35.9497	1832.83	142.651	70.1172
1708	AV04823	1832	Sight	Right	AOWL	-36.1178	1832.83	143.273	70.3975
1709	AV04823	1832	Sight	Right	AOWL	-35.9896	1832.84	143.466	70.8484
1710	AV04823	1832	Sight	Right	AOWL	-35.791	1832.84	143.646	71.4244
1711	AV04823	1832	Sight	Right	AOWL	-35.6456	1832.84	143.924	71.9889
1712	AV04823	1832	Sight	Right	AOWL	-35.7361	1832.84	144.448	72.3271
1713	AV04823	1832	Sight	Right	AOWL	-35.901	1832.85	145.266	72.8167
1714	AV04823	1832	Sight	Right	AOWL	-35.7869	1832.85	145.514	73.2906
1715	AV04823	1832	Sight	Right	AOWL	-35.0195	1832.86	145.343	74.6573
1716	AV04823	1832	Sight	Right	AOWL	-34.8728	1832.86	145.477	75.0859
1717	AV04823	1832	Sight	Right	AOWL	-34.9252	1832.87	146.217	75.7175
1718	AV04823	1832	Sight	Right	AOWL	-34.281	1832.87	145.919	76.706
1719	AV04823	1832	Sight	Right	AOWL	-33.8271	1832.87	146.23	77.916
1720	AV04823	1832	Sight	Right	AOWL	-33.8583	1832.88	146.561	78.1838
1721	AV04823	1832	Sight	Right	AOWL	-33.9515	1832.88	146.941	78.3777
1722	AV04823	1832	Sight	Right	AOWL	-33.9672	1832.88	147.226	78.6314
1723	AV04823	1832	Sight	Right	AOWL	-34.0712	1832.88	147.621	78.818
1724	AV04823	1832	Sight	Right	AOWL	-33.9009	1832.9	149.034	80.5463
1725	AV04823	1832	Sight	Right	AOWL	-33.9929	1832.9	149.352	80.6821
1726	AV04823	1832	Sight	Right	AOWL	-34.0894	1832.91	150.154	81.2908
1727	AV04823	1832	Sight	Right	AOWL	-34.0889	1832.91	150.33	81.4704
1728	AV04823	1832	Sight	Right	AOWL	-33.8853	1832.91	150.762	82.3007
1729	AV04823	1832	Sight	Right	AOWL	-34.4869	1832.92	151.808	82.1341
1730	AV04823	1832	Sight	Right	AOWL	-33.6693	1832.92	151.378	83.3312
1731	AV04823	1832	Sight	Right	AOWL	-33.0111	1832.92	151.595	84.8371
1732	AV04823	1832	Sight	Right	AOWL	-33.3834	1832.93	151.967	84.4722
1733	AV04823	1832	Sight	Right	AOWL	-33.8853	1832.93	152.565	84.0699
1734	AV04823	1832	Sight	Right	AOWL	-34.6521	1832.93	153.851	83.8166
1735	AV04823	1832	Sight	Right	AOWL	-34.5387	1832.94	153.91	84.102
1736	AV04823	1832	Sight	Right	AOWL	-34.432	1832.94	153.869	84.2783
1737	AV04823	1832	Sight	Right	AOWL	-33.3903	1832.94	153.171	85.6611
1738	AV04823	1832	Sight	Right	AOWL	-33.7025	1832.95	153.686	85.5498
1739	AV04823	1832	Sight	Right	AOWL	-33.8793	1832.95	153.944	85.4564
1740	AV04823	1832	Sight	Right	AOWL	-34.4558	1832.96	154.354	84.7295
1741	AV04823	1832	Sight	Right	AOWL	-32.5863	1832.97	154.216	88.282
1742	AV04823	1832	Sight	Right	AOWL	-34.2861	1832.97	155.448	86.1367
1743	AV04823	1832	Sight	Right	AOWL	-34.2366	1832.97	155.191	85.9888
1744	AV04823	1832	Sight	Right	AOWL	-33.6898	1832.98	154.9	86.7847
1745	AV04823	1832	Sight	Right	AOWL	-33.8053	1832.98	155.089	86.7424
1746	AV04823	1832	Sight	Right	AOWL	-32.9777	1832.99	154.344	87.6548
1747	AV04823	1832	Sight	Right	AOWL	-33.6188	1833	155.459	87.4728
1748	AV06419	1832	Sight	Right	AOWL	14.9449	1832.14	88.6221	118.093
1749	AV06886	1832	Sight	Right	AOWL	17.4187	1832.89	100.598	134.626
1750	AV06886	1832	Sight	Right	AOWL	21.1151	1832.9	101.179	142.523
1751	AV06886	1832	Sight	Right	AOWL	21.7238	1832.9	101.918	144.459
1752	AV12677	1832	Sight	Right	AOWL	-13.0094	1832.98	134.41	107.641
1753	AV12677	1832	Sight	Right	AOWL	-15.3467	1832.99	136.87	105.428
1754	AV12677	1832	Sight	Right	AOWL	-15.5896	1833	137.53	105.592
1755	AV12677	1832	Sight	Right	AOWL	-18.0201	1833	139.449	102.668
1756	AV12753	1832	Sight	Right	AOWL	-36.5161	1832.74	130.065	56.4448
1757	AV12753	1832	Sight	Right	AOWL	-36.5653	1832.75	131.057	57.3273
1758	AV12753	1832	Sight	Right	AOWL	-36.3522	1832.76	132.46	59.1703
1759	AV12753	1832	Sight	Right	AOWL	-36.3965	1832.78	135.376	61.9665
1760	AV12753	1832	Sight	Right	AOWL	-36.4431	1832.78	135.858	62.3538
1761	AV12753	1832	Sight	Right	AOWL	-37.554	1832.81	141.07	65.3165
1762	AV12753	1832	Sight	Right	AOWL	-36.6143	1832.84	144.531	70.6428
1763	AV12753	1832	Sight	Right	AOWL	-35.8677	1832.84	144.872	72.4743
1764	AV12753	1832	Sight	Right	AOWL	-35.5892	1832.86	146.561	74.7197
1765	AV12753	1832	Sight	Right	AOWL	-35.5457	1832.86	146.84	75.0851
1766	AV12753	1832	Sight	Right	AOWL	-35.1574	1832.88	148.413	77.4253
1767	AV12753	1832	Sight	Right	AOWL	-34.604	1832.88	148.622	78.7315
1768	AV12753	1832	Sight	Right	AOWL	-34.876	1832.89	149.227	78.8016
1769	AV12753	1832	Sight	Right	AOWL	-34.6042	1832.9	149.956	80.0641
1770	AV12753	1832	Sight	Right	AOWL	-33.6707	1832.9	149.157	81.1363
1771	AV12753	1832	Sight	Right	AOWL	-33.6712	1832.9	149.401	81.3787
1772	AV12753	1832	Sight	Right	AOWL	-33.6721	1832.91	149.863	81.8394
1773	AV12753	1832	Sight	Right	AOWL	-31.4981	1832.93	150.37	86.6411
1774	AV12753	1832	Sight	Right	AOWL	-28.3999	1832.95	149.055	91.4976
1775	AV12753	1832	Sight	Right	AOWL	-28.5741	1832.95	149.316	91.4116
1776	AV12753	1832	Sight	Right	AOWL	-28.0199	1832.98	149.401	92.6187
1777	AV12753	1832	Sight	Right	AOWL	-27.3578	1832.99	148.651	93.199
1778	AV12753	1832	Sight	Right	AOWL	-26.6346	1833	148.177	94.1663
1779	AV15860	1832	Sight	Right	AOWL	18.6045	1832.83	91.4721	127.937
1780	AV15860	1832	Sight	Right	AOWL	18.8502	1832.84	91.7568	128.707
1781	AV15860	1832	Sight	Right	AOWL	18.9053	1832.84	92.1253	129.182
1782	AV15860	1832	Sight	Right	AOWL	19.0159	1832.84	92.4954	129.768
1783	AV15860	1832	Sight	Right	AOWL	18.9666	1832.84	92.9234	130.095
1784	AV00397	1832	Strike	Right	AOWL	-36.5904	1832.87	148.941	75.0894
1785	AV00397	1832	Strike	Right	AOWL	-35.7508	1832.93	153.422	81.2314
1786	AV00521	1832	Strike	Right	AOWL	-37.3702	1832.8	139.558	64.2047
1787	AV00521	1832	Strike	Right	AOWL	-37.0748	1832.89	152.057	77.2189
1788	AV02502	1832	Strike	Right	AOWL	22.6655	1832.85	85.8525	130.809
1789	AV02502	1832	Strike	Right	AOWL	22.8508	1832.93	96.2824	141.336
1790	AV02502	1832	Strike	Right	AOWL	22.8892	1833	98.1423	143.127
1791	AV06607	1832	Strike	Right	AOWL	-27.197	1832.89	142.966	87.8312
1792	AV00397	1832	Strike	Right	AOWL	-17.503	1832.69	102.566	66.9364
1793	AV00397	1832	Strike	Right	AOWL	-36.4331	1832.75	130.62	57.1348
1794	AV00397	1832	Strike	Right	AOWL	-35.7959	1832.78	135.434	63.2399
1795	AV00397	1832	Strike	Right	AOWL	-35.9524	1832.8	138.249	65.7252
1796	AV00397	1832	Strike	Right	AOWL	-36.7267	1832.81	140.267	66.1894
1797	AV00397	1832	Strike	Right	AOWL	-35.9827	1832.83	143.135	70.5121
1798	AV00397	1832	Strike	Right	AOWL	-37.0321	1832.85	147.031	72.3041
1799	AV00397	1832	Strike	Right	AOWL	-36.7165	1832.86	148.057	73.9582
1800	AV00397	1832	Strike	Right	AOWL	-36.6229	1832.87	148.402	74.4844
1801	AV00397	1832	Strike	Right	AOWL	-36.6623	1832.88	149.542	75.5495
1802	AV00397	1832	Strike	Right	AOWL	-36.044	1832.88	149.859	77.0856
1803	AV00397	1832	Strike	Right	AOWL	-35.709	1832.9	151.62	79.5148
1804	AV00397	1832	Strike	Right	AOWL	-35.6585	1832.91	151.975	79.9741
1805	AV00397	1832	Strike	Right	AOWL	-35.7627	1832.91	152.244	80.0369
1806	AV00397	1832	Strike	Right	AOWL	-35.6579	1832.92	153.052	81.0504
1807	AV00397	1832	Strike	Right	AOWL	-35.8326	1832.93	153.908	81.5523
1808	AV00397	1832	Strike	Right	AOWL	-35.7765	1832.94	154.332	82.082
1809	AV00397	1832	Strike	Right	AOWL	-35.8708	1832.94	154.947	82.4996
1810	AV00397	1832	Strike	Right	AOWL	-35.1717	1832.95	155.677	84.5888
1811	AV00397	1832	Strike	Right	AOWL	-34.0012	1832.97	155.459	86.7074
1812	AV00397	1832	Strike	Right	AOWL	-33.5816	1832.97	155.288	87.369
1813	AV00521	1832	Strike	Right	AOWL	-37.569	1832.82	142.378	66.6083
1814	AV00521	1832	Strike	Right	AOWL	-37.6073	1832.82	142.836	66.9873
1815	AV00521	1832	Strike	Right	AOWL	-37.5548	1832.82	143.17	67.4253
1816	AV00521	1832	Strike	Right	AOWL	-37.6265	1832.83	144.47	68.5746
1817	AV00521	1832	Strike	Right	AOWL	-37.7744	1832.86	148.034	71.8254
1818	AV00521	1832	Strike	Right	AOWL	-37.8015	1832.86	148.886	72.6153
1819	AV00521	1832	Strike	Right	AOWL	-37.4932	1832.88	151.077	75.4043
1820	AV00521	1832	Strike	Right	AOWL	-36.7495	1832.9	152.035	77.8449
1821	AV00521	1832	Strike	Right	AOWL	-36.4003	1832.92	154.125	80.6171
1822	AV00521	1832	Strike	Right	AOWL	-35.8016	1832.94	154.372	82.0713
1823	AV00521	1832	Strike	Right	AOWL	-33.9714	1832.96	153.951	85.2966
1824	AV00521	1832	Strike	Right	AOWL	-28.8639	1833	150.585	92.1104
1825	AV02502	1832	Strike	Right	AOWL	22.8317	1832.8	78.4342	123.732
1826	AV02502	1832	Strike	Right	AOWL	22.7059	1832.81	80.8721	125.952
1827	AV02502	1832	Strike	Right	AOWL	22.7361	1832.82	82.2007	127.32
1828	AV02502	1832	Strike	Right	AOWL	22.7497	1832.83	83.07	128.203
1829	AV02502	1832	Strike	Right	AOWL	22.7063	1832.84	85.2446	130.28
1830	AV02502	1832	Strike	Right	AOWL	22.6687	1832.87	88.0028	132.934
1831	AV02502	1832	Strike	Right	AOWL	22.6818	1832.87	88.3941	133.342
1832	AV02502	1832	Strike	Right	AOWL	22.681	1832.87	88.7268	133.668
1833	AV02502	1832	Strike	Right	AOWL	22.6678	1832.87	89.0044	133.917
1834	AV02502	1832	Strike	Right	AOWL	22.6332	1832.88	89.521	134.363
1835	AV02502	1832	Strike	Right	AOWL	22.7138	1832.88	90.4792	135.446
1836	AV02502	1832	Strike	Right	AOWL	22.6964	1832.9	91.5577	136.472
1837	AV02502	1832	Strike	Right	AOWL	22.6967	1832.9	91.8332	136.741
1838	AV02502	1832	Strike	Right	AOWL	22.6374	1832.91	92.3448	137.135
1839	AV02502	1832	Strike	Right	AOWL	22.8733	1832.94	97.2969	142.355
1840	AV02502	1832	Strike	Right	AOWL	22.8691	1832.96	97.7638	142.786
1841	AV04222	1832	Strike	Right	AOWL	-33.7868	1832.02	155.817	87.487
1842	AV04222	1832	Strike	Right	AOWL	-31.8056	1832.03	152.74	88.4003
1843	AV04222	1832	Strike	Right	AOWL	-33.4064	1832.05	152.225	84.7339
1844	AV04222	1832	Strike	Right	AOWL	-33.2632	1832.05	152.118	84.9074
1845	AV05895	1832	Strike	Right	AOWL	20.7761	1832	105.517	145.455
1846	AV05895	1832	Strike	Right	AOWL	21.6548	1832.03	103.986	145.677
1847	AV05895	1832	Strike	Right	AOWL	15.7806	1832.11	94.3398	124.73
1848	AV05895	1832	Strike	Right	AOWL	15.8853	1832.13	91.1447	122.438
1849	AV05895	1832	Strike	Right	AOWL	15.779	1832.14	88.9587	120.071
1850	AV05895	1832	Strike	Right	AOWL	15.7826	1832.19	79.5601	110.761
1851	AV05895	1832	Strike	Right	AOWL	15.784	1832.22	75.7408	106.961
1852	AV05895	1832	Strike	Right	AOWL	15.7854	1832.24	71.9445	103.174
1853	AV05895	1832	Strike	Right	AOWL	15.7857	1832.24	71.0031	102.234
1854	AV05895	1832	Strike	Right	AOWL	15.7875	1832.27	66.3674	97.5938
1855	AV05895	1832	Strike	Right	AOWL	15.789	1832.29	62.7811	93.9939
1856	AV05895	1832	Strike	Right	AOWL	16.0561	1832.34	55.3927	87.0737
1857	AV05895	1832	Strike	Right	AOWL	15.7927	1832.35	54.2587	85.3997
1858	AV05895	1832	Strike	Right	AOWL	15.7937	1832.37	52.1763	83.2891
1859	AV05895	1832	Strike	Right	AOWL	15.7942	1832.38	51.2132	82.3113
1860	AV06514	1832	Strike	Right	AOWL	-23.1061	1832.93	142.985	96.0084
1861	AV06514	1832	Strike	Right	AOWL	-24.5783	1832.94	144.804	94.8874
1862	AV06514	1832	Strike	Right	AOWL	-25.7181	1832.94	145.967	93.7763
1863	AV06514	1832	Strike	Right	AOWL	-26.2782	1832.95	146.71	93.4029
1864	AV06514	1832	Strike	Right	AOWL	-28.6463	1832.96	149.868	91.8151
1865	AV06514	1832	Strike	Right	AOWL	-27.6895	1832.98	149.228	93.1021
1866	AV06514	1832	Strike	Right	AOWL	-27.3586	1833	148.282	92.8452
1867	AV06607	1832	Strike	Right	AOWL	-25.6492	1832.81	131.115	79.1367
1868	AV06607	1832	Strike	Right	AOWL	-28.6683	1832.87	142.781	84.714
1869	AV06607	1832	Strike	Right	AOWL	-27.1985	1832.9	143.894	88.7493
1870	AV06607	1832	Strike	Right	AOWL	-27.1999	1832.9	144.751	89.5989
1871	AV06607	1832	Strike	Right	AOWL	-27.2014	1832.91	145.534	90.3743
1872	AV06607	1832	Strike	Right	AOWL	-27.2019	1832.91	145.777	90.6153
1873	AV06607	1832	Strike	Right	AOWL	-27.2042	1832.93	146.852	91.6815
1874	AV06607	1832	Strike	Right	AOWL	-27.2049	1832.93	147.037	91.8654
1875	AV06607	1832	Strike	Right	AOWL	-27.2062	1832.94	147.531	92.3565
1876	AV06607	1832	Strike	Right	AOWL	-27.2077	1832.95	147.929	92.7526
1877	AV06607	1832	Strike	Right	AOWL	-26.5127	1832.96	147.46	93.6788
1878	AV06607	1832	Strike	Right	AOWL	-26.5134	1832.96	147.536	93.7554
1879	AV02143	1833	Sight	Finback	AOWL	23.7918	1833.8	78.1603	125.381
1880	AV02143	1833	Sight	Finback	AOWL	23.6209	1833.81	80.2744	127.101
1881	AV02143	1833	Sight	Finback	AOWL	23.4044	1833.81	82.1308	128.476
1882	AV07157	1833	Sight	Finback	AOWL	2.14963	1833.23	86.5017	90.6122
1883	AV07157	1833	Sight	Finback	AOWL	1.71903	1833.23	86.215	89.4571
1884	AV10772	1833	Sight	Finback	AOWL	-38.6345	1833.67	116.332	39.4813
1885	AV10772	1833	Sight	Finback	AOWL	17.6897	1833.84	92.0823	126.742
1886	AV10772	1833	Sight	Finback	AOWL	21.4795	1833.85	93.8461	135.99
1887	AV10772	1833	Sight	Finback	AOWL	28.4377	1833.89	103.36	158.411
1888	AV10772	1833	Sight	Finback	AOWL	25.7221	1833.9	103.785	153.446
1889	AV10772	1833	Sight	Finback	AOWL	20.1289	1833.91	103.75	142.383
1890	AV10772	1833	Sight	Finback	AOWL	4.83372	1833.95	111.076	120.245
1891	AV10772	1833	Sight	Finback	AOWL	3.54848	1833.96	112.002	118.659
1892	AV10772	1833	Sight	Finback	AOWL	3.39963	1833.96	112.006	118.388
1893	AV10772	1833	Sight	Finback	AOWL	2.88001	1833.98	111.904	117.343
1894	AV11281	1833	Sight	Finback	AOWL	2.27808	1833.07	106.027	110.499
1895	AV11281	1833	Sight	Finback	AOWL	10.4205	1833.33	62.24	83.3959
1896	AV11281	1833	Sight	Finback	AOWL	9.97302	1833.34	61.6533	81.9428
1897	AV11281	1833	Sight	Finback	AOWL	9.56912	1833.35	60.3786	79.8754
1898	AV11281	1833	Sight	Finback	AOWL	7.33906	1833.38	58.7434	73.8442
1899	AV11281	1833	Sight	Finback	AOWL	7.46717	1833.39	58.1512	73.5144
1900	AV11281	1833	Sight	Finback	AOWL	5.21941	1833.72	82.7898	93.7757
1901	AV11281	1833	Sight	Finback	AOWL	5.11361	1833.75	88.3366	99.1117
1902	AV11755	1833	Sight	Finback	AOWL	7.59179	1833.12	95.4215	110.642
1903	AV11755	1833	Sight	Finback	AOWL	5.59737	1833.29	75.305	86.3193
1904	AV11755	1833	Sight	Finback	AOWL	5.34963	1833.3	74.5518	85.0273
1905	AV11755	1833	Sight	Finback	AOWL	-1.10363	1833.56	70.2997	67.8118
1906	AV11755	1833	Sight	Finback	AOWL	-1.16205	1833.57	71.0674	68.4418
1907	AV11755	1833	Sight	Finback	AOWL	15.4112	1833.94	106.39	136.388
1908	AV11755	1833	Sight	Finback	AOWL	13.5225	1833.97	108.707	134.961
1909	AV11755	1833	Strike	Humpback	AOWL	9.6435	1833.01	104.683	124.362
1910	AV02143	1833	Sight	Humpback	AOWL	23.6209	1833.81	80.2744	127.101
1911	AV02143	1833	Sight	Humpback	AOWL	23.5188	1833.81	81.1174	127.719
1912	AV09201	1833	Sight	Humpback	AOWL	10.4459	1833.36	60.0897	80.6327
1913	AV10772	1833	Sight	Humpback	AOWL	7.95285	1833.8	92.6916	108.124
1914	AV10772	1833	Sight	Humpback	AOWL	19.4644	1833.84	92.8837	131.045
1915	AV10772	1833	Sight	Humpback	AOWL	20.4632	1833.85	92.9419	133.083
1916	AV10772	1833	Sight	Humpback	AOWL	20.8603	1833.85	93.5169	134.436
1917	AV10772	1833	Sight	Humpback	AOWL	27.1172	1833.87	96.9656	149.468
1918	AV10772	1833	Sight	Humpback	AOWL	12.7585	1833.93	105.909	130.698
1919	AV10772	1833	Sight	Humpback	AOWL	4.83372	1833.95	111.076	120.245
1920	AV11755	1833	Sight	Humpback	AOWL	9.77036	1833	104.92	124.876
1921	AV11755	1833	Sight	Humpback	AOWL	9.70574	1833.01	104.807	124.622
1922	AV11755	1833	Sight	Humpback	AOWL	9.64373	1833.01	104.418	124.089
1923	AV11755	1833	Sight	Humpback	AOWL	8.63574	1833.07	99.9236	117.401
1924	AV11755	1833	Sight	Humpback	AOWL	7.70689	1833.11	96.0154	111.485
1925	AV11755	1833	Sight	Humpback	AOWL	7.64916	1833.12	95.7189	111.063
1926	AV11755	1833	Sight	Humpback	AOWL	7.59179	1833.12	95.4215	110.642
1927	AV10772	1833	Strike	Right	AOWL	17.1632	1833.92	104.407	137.229
1928	AV11755	1833	Strike	Right	AOWL	16.522	1833.81	88.254	120.622
1929	AV10772	1833	Sight	Right	AOWL	18.0596	1833.92	103.807	138.399
1930	AV11755	1833	Sight	Right	AOWL	14.4841	1833.68	68.3566	96.7224
1931	AV11755	1833	Sight	Right	AOWL	16.9025	1833.81	88.4895	121.609
1932	AV11755	1833	Sight	Right	AOWL	13.5517	1833.93	106.927	133.228
1933	AV11755	1833	Sight	Right	AOWL	15.4112	1833.94	106.39	136.388
1934	AV02843	1833	Strike	Right	AOWL	-37.2394	1833.84	145.359	70.24
1935	AV02843	1833	Strike	Right	AOWL	-35.7225	1833.9	152.895	80.711
1936	AV04823	1833	Strike	Right	AOWL	-27.6229	1833.07	145.047	89.1298
1937	AV12677	1833	Strike	Right	AOWL	-17.1265	1833.17	113.851	79.4015
1938	AV12677	1833	Strike	Right	AOWL	-35.2323	1833.89	150.079	78.9172
1939	AV13271	1833	Strike	Right	AOWL	-35.4258	1833.9	151.201	79.6453
1940	AV13271	1833	Strike	Right	AOWL	-35.7248	1833.98	157.559	85.3552
1941	AV02502	1833	Strike	Right	AOWL	-15.015	1833.07	134.151	103.398
1942	AV02502	1833	Strike	Right	AOWL	-37.1594	1833.8	139.643	64.7118
1943	AV02502	1833	Strike	Right	AOWL	-37.003	1833.81	141.014	66.3964
1944	AV02502	1833	Strike	Right	AOWL	-36.5012	1833.85	145.75	72.1016
1945	AV02502	1833	Strike	Right	AOWL	-36.346	1833.86	146.755	73.4075
1946	AV02502	1833	Strike	Right	AOWL	-36.2053	1833.86	147.469	74.393
1947	AV02502	1833	Strike	Right	AOWL	-36.1727	1833.86	147.801	74.7873
1948	AV02502	1833	Strike	Right	AOWL	-35.9297	1833.88	149.818	77.2681
1949	AV02502	1833	Strike	Right	AOWL	-35.7165	1833.89	150.59	78.4585
1950	AV02502	1833	Strike	Right	AOWL	-35.4727	1833.89	150.658	79.0226
1951	AV02843	1833	Strike	Right	AOWL	-37.3956	1833.78	137.472	62.0682
1952	AV02843	1833	Strike	Right	AOWL	-37.4532	1833.79	138.807	63.2841
1953	AV02843	1833	Strike	Right	AOWL	-36.7288	1833.86	147.886	73.7672
1954	AV02843	1833	Strike	Right	AOWL	-36.6384	1833.86	148.166	74.2258
1955	AV02843	1833	Strike	Right	AOWL	-35.82	1833.89	151.102	78.7468
1956	AV02843	1833	Strike	Right	AOWL	-35.7141	1833.9	152.555	80.3913
1957	AV02843	1833	Strike	Right	AOWL	-35.4326	1833.93	154.66	83.049
1958	AV02843	1833	Strike	Right	AOWL	-28.068	1833.97	150.058	93.1536
1959	AV02843	1833	Strike	Right	AOWL	-30.2855	1833.98	152.392	91.0582
1960	AV04361	1833	Strike	Right	AOWL	-16.305	1833.67	98.131	64.891
1961	AV12677	1833	Strike	Right	AOWL	-34.363	1833.05	152.44	83.0489
1962	AV12677	1833	Strike	Right	AOWL	-17.5509	1833.26	101.871	66.5923
1963	AV12677	1833	Strike	Right	AOWL	-37.9557	1833.78	138.252	61.7113
1964	AV12677	1833	Strike	Right	AOWL	-38.0148	1833.79	138.727	62.0685
1965	AV12677	1833	Strike	Right	AOWL	-37.9671	1833.8	140.421	63.8513
1966	AV12677	1833	Strike	Right	AOWL	-37.9737	1833.8	140.816	64.234
1967	AV12677	1833	Strike	Right	AOWL	-37.9164	1833.83	145.087	68.5917
1968	AV12677	1833	Strike	Right	AOWL	-37.5086	1833.84	145.809	70.1423
1969	AV12677	1833	Strike	Right	AOWL	-36.8787	1833.86	147.826	73.4028
1970	AV12677	1833	Strike	Right	AOWL	-36.7298	1833.86	147.962	73.8382
1971	AV12753	1833	Strike	Right	AOWL	-27.9115	1833.01	149.139	92.5859
1972	AV12753	1833	Strike	Right	AOWL	-24.2769	1833.04	143.87	94.6199
1973	AV12753	1833	Strike	Right	AOWL	-24.4074	1833.05	143.884	94.3594
1974	AV12753	1833	Strike	Right	AOWL	-25.6036	1833.07	142.78	90.9091
1975	AV13271	1833	Strike	Right	AOWL	-37.5519	1833.79	138.851	63.1335
1976	AV13271	1833	Strike	Right	AOWL	-37.5064	1833.8	139.63	64.002
1977	AV13271	1833	Strike	Right	AOWL	-37.4184	1833.8	139.952	64.4996
1978	AV13271	1833	Strike	Right	AOWL	-37.4211	1833.8	140.405	64.9435
1979	AV13271	1833	Strike	Right	AOWL	-37.3068	1833.83	143.769	68.5099
1980	AV13271	1833	Strike	Right	AOWL	-36.7677	1833.84	144.583	70.4059
1981	AV13271	1833	Strike	Right	AOWL	-36.536	1833.84	144.707	70.9927
1982	AV13271	1833	Strike	Right	AOWL	-36.5992	1833.85	146.64	72.7889
1983	AV13271	1833	Strike	Right	AOWL	-35.9549	1833.87	148.907	76.3222
1984	AV13271	1833	Strike	Right	AOWL	-35.9009	1833.89	150.531	78.0408
1985	AV13271	1833	Strike	Right	AOWL	-35.2458	1833.9	151.368	80.1683
1986	AV13271	1833	Strike	Right	AOWL	-35.5086	1833.91	152.357	80.63
1987	AV13271	1833	Strike	Right	AOWL	-35.5019	1833.93	154.115	82.3887
1988	AV13271	1833	Strike	Right	AOWL	-35.6126	1833.96	156.998	85.0131
1989	AV13271	1833	Strike	Right	AOWL	-35.1541	1833.97	156.932	85.8611
1990	AV13271	1833	Strike	Right	AOWL	-35.0805	1833.97	156.781	85.8618
1991	AV13271	1833	Strike	Right	AOWL	-34.7311	1833.99	156.831	86.6107
1992	AV02502	1833	Strike	Right	AOWL	-36.8887	1833.72	126.393	51.9901
1993	AV02502	1833	Strike	Right	AOWL	-36.8442	1833.81	141.158	66.8629
1994	AV02843	1833	Strike	Right	AOWL	-37.5089	1833.79	138.394	62.7633
1995	AV02843	1833	Strike	Right	AOWL	-37.6894	1833.8	139.874	63.8763
1996	AV02843	1833	Strike	Right	AOWL	-37.4875	1833.82	143.239	67.6365
1997	AV02843	1833	Strike	Right	AOWL	-35.8404	1833.89	151.508	79.1074
1998	AV02843	1833	Strike	Right	AOWL	-32.8237	1833.96	153.595	87.2044
1999	AV02843	1833	Strike	Right	AOWL	-29.4489	1833.98	151.484	91.8218
[truncated: 37,303 more rows]
